# Supplementary material for: The Amidation Step of Diphthamide Biosynthesis in Yeast Requires DPH6, a Gene Identified through Mining the DPH1-DPH5 Interaction Network
Source: PLoS Genet. 2013 Feb 28;9(2):e1003334. doi: 10.1371/journal.pgen.1003334 (PMC3585130; doi:10.1371/journal.pgen.1003334)
Supplement: Table S1 — SGA-based Excel spreadsheet extracted from the DRYGIN database for comprehensive presentation of genetic interactions between query genes DPH1, DPH2, DPH4, DPH5, DPH6/YLR143w and DPH7/YBR246w and array ORFs totaling 3885 (DPH1, DPH2, DPH6/YLR143w and DPH7/YBR246w) and 4457 (DPH4 and DPH5). Genetic interaction profiles among the six queries were ranked according to Pearson Correlation Coefficient determination (PCC). Correlation scores of the top ten interactors identified with each query gene identified a tightly clustered and highly robust, SGA-based DPH gene network (Figure 2C). (XLSX) [file pgen.1003334.s010.xlsx]

## Sheet: DPH1
ORF1	Gene1	ORF2	Gene2	Correlation
YIL103W	DPH1	YKL191W	DPH2	0.303
YIL103W	DPH1	YJR097W	DPH4/JJJ3	0.3
YIL103W	DPH1	YLR172C	DPH5	0.275
YIL103W	DPH1	YGR205W	YGR205W	0.241
YIL103W	DPH1	YDR385W	EFT2	0.218
YIL103W	DPH1	YDR110W	FOB1	0.215
YIL103W	DPH1	YBR246W	YBR246W	0.21
YIL103W	DPH1	YHR210C	YHR210C	0.202
YIL103W	DPH1	YDL121C	YDL121C	0.191
YIL103W	DPH1	YDR223W	CRF1	0.186
YIL103W	DPH1	YPR022C	YPR022C	0.177
YIL103W	DPH1	YKL098W	MTC2	0.169
YIL103W	DPH1	YJL124C	LSM1	0.164
YIL103W	DPH1	YDR474C	YDR474C	0.163
YIL103W	DPH1	YGR107W	YGR107W	0.162
YIL103W	DPH1	YPL145C	KES1	0.162
YIL103W	DPH1	YFR044C	DUG1	0.157
YIL103W	DPH1	YNR073C	YNR073C	0.157
YIL103W	DPH1	YBR263W	SHM1	0.155
YIL103W	DPH1	YLR368W	MDM30	0.155
YIL103W	DPH1	YGR203W	YGR203W	0.154
YIL103W	DPH1	YDL186W	YDL186W	0.153
YIL103W	DPH1	YBL060W	YEL1	0.148
YIL103W	DPH1	YDL133W	YDL133W	0.146
YIL103W	DPH1	YIL149C	MLP2	0.146
YIL103W	DPH1	YLR143W	YLR143W	0.144
YIL103W	DPH1	YKR095W	MLP1	0.143
YIL103W	DPH1	YBR024W	SCO2	0.142
YIL103W	DPH1	YGL014W	PUF4	0.137
YIL103W	DPH1	YJR140C	HIR3	0.136
YIL103W	DPH1	YPR023C	EAF3	0.136
YIL103W	DPH1	YAL045C	YAL045C	0.131
YIL103W	DPH1	YIL134W	FLX1	0.131
YIL103W	DPH1	YLR018C	POM34	0.13
YIL103W	DPH1	YCR077C	PAT1	0.129
YIL103W	DPH1	YJL020C	BBC1	0.128
YIL103W	DPH1	YDL177C	YDL177C	0.127
YIL103W	DPH1	YNR025C	YNR025C	0.123
YIL103W	DPH1	YIL101C	XBP1	0.122
YIL103W	DPH1	YML067C	ERV41	0.122
YIL103W	DPH1	YHR146W	CRP1	0.12
YIL103W	DPH1	YBR178W	YBR178W	0.118
YIL103W	DPH1	YOR133W	EFT1	0.118
YIL103W	DPH1	YMR080C	NAM7	0.116
YIL103W	DPH1	YDR244W	PEX5	0.113
YIL103W	DPH1	YKL157W	APE2	0.113
YIL103W	DPH1	YPL089C	RLM1	0.113
YIL103W	DPH1	YIR042C	YIR042C	0.111
YIL103W	DPH1	YPL066W	YPL066W	0.111
YIL103W	DPH1	YIL030C	SSM4	0.11
YIL103W	DPH1	YKL110C	KTI12	0.11
YIL103W	DPH1	YIL123W	SIM1	0.109
YIL103W	DPH1	YKR024C	DBP7	0.109
YIL103W	DPH1	YAL043C-A	YAL043C-A	0.108
YIL103W	DPH1	YGR178C	PBP1	0.106
YIL103W	DPH1	YKL025C	PAN3	0.106
YIL103W	DPH1	YDR430C	CYM1	0.104
YIL103W	DPH1	YNL100W	AIM37	0.104
YIL103W	DPH1	YCR079W	PTC6	0.103
YIL103W	DPH1	YLR003C	CMS1	0.103
YIL103W	DPH1	YJR066W	TOR1	0.102
YIL103W	DPH1	YKL213C	DOA1	0.102
YIL103W	DPH1	YDR395W	SXM1	0.101
YIL103W	DPH1	YKR088C	TVP38	0.101
YIL103W	DPH1	YMR019W	STB4	0.101
YIL103W	DPH1	YMR299C	DYN3	0.101
YIL103W	DPH1	YPL060W	LPE10	0.101
YIL103W	DPH1	YNL064C	YDJ1	0.099
YIL103W	DPH1	YNR002C	ATO2	0.099
YIL103W	DPH1	YPR095C	SYT1	0.099
YIL103W	DPH1	YKL087C	CYT2	0.098
YIL103W	DPH1	YDR386W	MUS81	0.097
YIL103W	DPH1	YER085C	YER085C	0.097
YIL103W	DPH1	YOR136W	IDH2	0.097
YIL103W	DPH1	YBR260C	RGD1	0.096
YIL103W	DPH1	YKL056C	TMA19	0.096
YIL103W	DPH1	YPL155C	KIP2	0.096
YIL103W	DPH1	YJL171C	YJL171C	0.095
YIL103W	DPH1	YKR093W	PTR2	0.095
YIL103W	DPH1	YML030W	AIM31	0.095
YIL103W	DPH1	YDR159W	SAC3	0.094
YIL103W	DPH1	YJL053W	PEP8	0.094
YIL103W	DPH1	YJR069C	HAM1	0.094
YIL103W	DPH1	YLR238W	FAR10	0.094
YIL103W	DPH1	YLR453C	RIF2	0.094
YIL103W	DPH1	YMR175W	SIP18	0.094
YIL103W	DPH1	YNL080C	EOS1	0.094
YIL103W	DPH1	YNL144C	YNL144C	0.094
YIL103W	DPH1	YDR073W	SNF11	0.093
YIL103W	DPH1	YJL047C	RTT101	0.093
YIL103W	DPH1	YBR083W	TEC1	0.092
YIL103W	DPH1	YDR250C	YDR250C	0.092
YIL103W	DPH1	YIL119C	RPI1	0.092
YIL103W	DPH1	YIR013C	GAT4	0.092
YIL103W	DPH1	YJR037W	YJR037W	0.092
YIL103W	DPH1	YJR053W	BFA1	0.092
YIL103W	DPH1	YNR042W	YNR042W	0.092
YIL103W	DPH1	YGL086W	MAD1	0.091
YIL103W	DPH1	YGL218W	YGL218W	0.091
YIL103W	DPH1	YHR016C	YSC84	0.091
YIL103W	DPH1	YLR095C	IOC2	0.091
YIL103W	DPH1	YOR062C	YOR062C	0.091
YIL103W	DPH1	YCL061C	MRC1	0.09
YIL103W	DPH1	YDR256C	CTA1	0.09
YIL103W	DPH1	YBR161W	CSH1	0.089
YIL103W	DPH1	YCR037C	PHO87	0.089
YIL103W	DPH1	YCR100C	YCR100C	0.089
YIL103W	DPH1	YIL014W	MNT3	0.089
YIL103W	DPH1	YOR076C	SKI7	0.089
YIL103W	DPH1	YPR026W	ATH1	0.089
YIL103W	DPH1	YER092W	IES5	0.088
YIL103W	DPH1	YHL027W	RIM101	0.088
YIL103W	DPH1	YIL034C	CAP2	0.088
YIL103W	DPH1	YNL016W	PUB1	0.088
YIL103W	DPH1	YNL093W	YPT53	0.088
YIL103W	DPH1	YOL086C	ADH1	0.088
YIL103W	DPH1	YPR153W	YPR153W	0.088
YIL103W	DPH1	YDR349C	YPS7	0.087
YIL103W	DPH1	YMR127C	SAS2	0.087
YIL103W	DPH1	YNL129W	NRK1	0.087
YIL103W	DPH1	YDL123W	SNA4	0.086
YIL103W	DPH1	YDR384C	ATO3	0.086
YIL103W	DPH1	YMR204C	INP1	0.086
YIL103W	DPH1	YOL062C	APM4	0.086
YIL103W	DPH1	YOR066W	MSA1	0.086
YIL103W	DPH1	YOR135C	IRC14	0.086
YIL103W	DPH1	YBR042C	CST26	0.085
YIL103W	DPH1	YDR007W	TRP1	0.085
YIL103W	DPH1	YBR020W	GAL1	0.084
YIL103W	DPH1	YDL080C	THI3	0.084
YIL103W	DPH1	YGL197W	MDS3	0.084
YIL103W	DPH1	YKR065C	PAM17	0.084
YIL103W	DPH1	YLL016W	SDC25	0.084
YIL103W	DPH1	YPL101W	ELP4	0.084
YIL103W	DPH1	YPR167C	MET16	0.084
YIL103W	DPH1	YBR214W	SDS24	0.083
YIL103W	DPH1	YDL129W	YDL129W	0.083
YIL103W	DPH1	YFR033C	QCR6	0.083
YIL103W	DPH1	YGR182C	YGR182C	0.083
YIL103W	DPH1	YLR189C	ATG26	0.083
YIL103W	DPH1	YPL086C	ELP3	0.083
YIL103W	DPH1	YDR005C	MAF1	0.082
YIL103W	DPH1	YER046W	SPO73	0.082
YIL103W	DPH1	YKR021W	ALY1	0.082
YIL103W	DPH1	YLR085C	ARP6	0.082
YIL103W	DPH1	YLR384C	IKI3	0.082
YIL103W	DPH1	YOR121C	YOR121C	0.082
YIL103W	DPH1	YOR162C	YRR1	0.082
YIL103W	DPH1	YER140W	YER140W	0.081
YIL103W	DPH1	YFR023W	PES4	0.081
YIL103W	DPH1	YHR044C	DOG1	0.081
YIL103W	DPH1	YIL141W	YIL141W	0.081
YIL103W	DPH1	YKL162C	YKL162C	0.081
YIL103W	DPH1	YLR354C	TAL1	0.081
YIL103W	DPH1	YPR051W	MAK3	0.081
YIL103W	DPH1	YBR084W	MIS1	0.08
YIL103W	DPH1	YBR262C	AIM5	0.08
YIL103W	DPH1	YDR471W	RPL27B	0.08
YIL103W	DPH1	YMR052W	FAR3	0.08
YIL103W	DPH1	YOL046C	YOL046C	0.08
YIL103W	DPH1	YOR213C	SAS5	0.08
YIL103W	DPH1	YDR126W	SWF1	0.079
YIL103W	DPH1	YER155C	BEM2	0.079
YIL103W	DPH1	YGR181W	TIM13	0.079
YIL103W	DPH1	YJL217W	REE1	0.079
YIL103W	DPH1	YML100W	TSL1	0.079
YIL103W	DPH1	YOR195W	SLK19	0.079
YIL103W	DPH1	YDL157C	YDL157C	0.078
YIL103W	DPH1	YFR026C	ULI1	0.078
YIL103W	DPH1	YIL077C	YIL077C	0.078
YIL103W	DPH1	YJL154C	VPS35	0.078
YIL103W	DPH1	YMR279C	YMR279C	0.078
YIL103W	DPH1	YNR051C	BRE5	0.078
YIL103W	DPH1	YOR137C	SIA1	0.078
YIL103W	DPH1	YBR098W	MMS4	0.077
YIL103W	DPH1	YDL130W-A	STF1	0.077
YIL103W	DPH1	YDL241W	YDL241W	0.077
YIL103W	DPH1	YDR148C	KGD2	0.077
YIL103W	DPH1	YIL124W	AYR1	0.077
YIL103W	DPH1	YJL164C	TPK1	0.077
YIL103W	DPH1	YLR356W	YLR356W	0.077
YIL103W	DPH1	YOR333C	YOR333C	0.077
YIL103W	DPH1	YPL207W	TYW1	0.077
YIL103W	DPH1	YPL249C	GYP5	0.077
YIL103W	DPH1	YDR281C	PHM6	0.076
YIL103W	DPH1	YDR436W	PPZ2	0.076
YIL103W	DPH1	YGR270W	YTA7	0.076
YIL103W	DPH1	YHR121W	LSM12	0.076
YIL103W	DPH1	YKR039W	GAP1	0.076
YIL103W	DPH1	YLL041C	SDH2	0.076
YIL103W	DPH1	YLR407W	YLR407W	0.076
YIL103W	DPH1	YML053C	YML053C	0.076
YIL103W	DPH1	YMR198W	CIK1	0.076
YIL103W	DPH1	YBR229C	ROT2	0.075
YIL103W	DPH1	YDL039C	PRM7	0.075
YIL103W	DPH1	YLR094C	GIS3	0.075
YIL103W	DPH1	YLR308W	CDA2	0.075
YIL103W	DPH1	YNL037C	IDH1	0.075
YIL103W	DPH1	YBR082C	UBC4	0.074
YIL103W	DPH1	YBR107C	IML3	0.074
YIL103W	DPH1	YCR059C	YIH1	0.074
YIL103W	DPH1	YDR539W	YDR539W	0.074
YIL103W	DPH1	YIL025C	YIL025C	0.074
YIL103W	DPH1	YIR032C	DAL3	0.074
YIL103W	DPH1	YKR050W	TRK2	0.074
YIL103W	DPH1	YLR292C	SEC72	0.074
YIL103W	DPH1	YAL020C	ATS1	0.073
YIL103W	DPH1	YDR116C	MRPL1	0.073
YIL103W	DPH1	YDR485C	VPS72	0.073
YIL103W	DPH1	YGL152C	YGL152C	0.073
YIL103W	DPH1	YGR187C	HGH1	0.073
YIL103W	DPH1	YGR201C	YGR201C	0.073
YIL103W	DPH1	YIL145C	PAN6	0.073
YIL103W	DPH1	YJL141C	YAK1	0.073
YIL103W	DPH1	YJL213W	YJL213W	0.073
YIL103W	DPH1	YLR337C	VRP1	0.073
YIL103W	DPH1	YNR018W	AIM38	0.073
YIL103W	DPH1	YNR022C	MRPL50	0.073
YIL103W	DPH1	YNR049C	MSO1	0.073
YIL103W	DPH1	YOL009C	MDM12	0.073
YIL103W	DPH1	YOL054W	PSH1	0.073
YIL103W	DPH1	YDR379W	RGA2	0.072
YIL103W	DPH1	YER142C	MAG1	0.072
YIL103W	DPH1	YIL159W	BNR1	0.072
YIL103W	DPH1	YMR154C	RIM13	0.072
YIL103W	DPH1	YMR244C-A	YMR244C-A	0.072
YIL103W	DPH1	YOL084W	PHM7	0.072
YIL103W	DPH1	YPL244C	HUT1	0.072
YIL103W	DPH1	YPL247C	YPL247C	0.072
YIL103W	DPH1	YPR157W	YPR157W	0.072
YIL103W	DPH1	YDR490C	PKH1	0.071
YIL103W	DPH1	YGR124W	ASN2	0.071
YIL103W	DPH1	YHL009C	YAP3	0.071
YIL103W	DPH1	YHR021C	RPS27B	0.071
YIL103W	DPH1	YJL013C	MAD3	0.071
YIL103W	DPH1	YJR087W	YJR087W	0.071
YIL103W	DPH1	YMR123W	PKR1	0.071
YIL103W	DPH1	YMR136W	GAT2	0.071
YIL103W	DPH1	YMR224C	MRE11	0.071
YIL103W	DPH1	YMR294W	JNM1	0.071
YIL103W	DPH1	YMR295C	IBI2	0.071
YIL103W	DPH1	YNL046W	YNL046W	0.071
YIL103W	DPH1	YOL045W	PSK2	0.071
YIL103W	DPH1	YOL103W	ITR2	0.071
YIL103W	DPH1	YPR074C	TKL1	0.071
YIL103W	DPH1	YAR003W	SWD1	0.07
YIL103W	DPH1	YBR219C	YBR219C	0.07
YIL103W	DPH1	YBR270C	BIT2	0.07
YIL103W	DPH1	YDL065C	PEX19	0.07
YIL103W	DPH1	YDR179C	CSN9	0.07
YIL103W	DPH1	YDR447C	RPS17B	0.07
YIL103W	DPH1	YER158C	YER158C	0.07
YIL103W	DPH1	YFL049W	SWP82	0.07
YIL103W	DPH1	YGR126W	YGR126W	0.07
YIL103W	DPH1	YGR127W	YGR127W	0.07
YIL103W	DPH1	YJL099W	CHS6	0.07
YIL103W	DPH1	YJL170C	ASG7	0.07
YIL103W	DPH1	YJL211C	YJL211C	0.07
YIL103W	DPH1	YLL021W	SPA2	0.07
YIL103W	DPH1	YLR332W	MID2	0.07
YIL103W	DPH1	YLR371W	ROM2	0.07
YIL103W	DPH1	YMR126C	DLT1	0.07
YIL103W	DPH1	YOR027W	STI1	0.07
YIL103W	DPH1	YOR266W	PNT1	0.07
YIL103W	DPH1	YPL041C	YPL041C	0.07
YIL103W	DPH1	YGL059W	PKP2	0.069
YIL103W	DPH1	YHR178W	STB5	0.069
YIL103W	DPH1	YJL030W	MAD2	0.069
YIL103W	DPH1	YKL137W	CMC1	0.069
YIL103W	DPH1	YLR374C	YLR374C	0.069
YIL103W	DPH1	YML005W	TRM12	0.069
YIL103W	DPH1	YOR293W	RPS10A	0.069
YIL103W	DPH1	YIL029C	YIL029C	0.068
YIL103W	DPH1	YIL043C	CBR1	0.068
YIL103W	DPH1	YJR117W	STE24	0.068
YIL103W	DPH1	YLR289W	GUF1	0.068
YIL103W	DPH1	YNL090W	RHO2	0.068
YIL103W	DPH1	YPR060C	ARO7	0.068
YIL103W	DPH1	YDR391C	YDR391C	0.067
YIL103W	DPH1	YER091C	MET6	0.067
YIL103W	DPH1	YFL019C	YFL019C	0.067
YIL103W	DPH1	YHR096C	HXT5	0.067
YIL103W	DPH1	YIL167W	SDL1	0.067
YIL103W	DPH1	YJL095W	BCK1	0.067
YIL103W	DPH1	YJL210W	PEX2	0.067
YIL103W	DPH1	YKL010C	UFD4	0.067
YIL103W	DPH1	YMR004W	MVP1	0.067
YIL103W	DPH1	YMR177W	MMT1	0.067
YIL103W	DPH1	YOR243C	PUS7	0.067
YIL103W	DPH1	YOR315W	SFG1	0.067
YIL103W	DPH1	YBR078W	ECM33	0.066
YIL103W	DPH1	YDL053C	PBP4	0.066
YIL103W	DPH1	YDL175C	AIR2	0.066
YIL103W	DPH1	YDR004W	RAD57	0.066
YIL103W	DPH1	YGL242C	YGL242C	0.066
YIL103W	DPH1	YHR204W	MNL1	0.066
YIL103W	DPH1	YJL094C	KHA1	0.066
YIL103W	DPH1	YKR011C	YKR011C	0.066
YIL103W	DPH1	YLR381W	CTF3	0.066
YIL103W	DPH1	YML057W	CMP2	0.066
YIL103W	DPH1	YNL140C	YNL140C	0.066
YIL103W	DPH1	YOL067C	RTG1	0.066
YIL103W	DPH1	YOL131W	YOL131W	0.066
YIL103W	DPH1	YOR166C	SWT1	0.066
YIL103W	DPH1	YPR063C	YPR063C	0.066
YIL103W	DPH1	YBR287W	YBR287W	0.065
YIL103W	DPH1	YDR488C	PAC11	0.065
YIL103W	DPH1	YGL035C	MIG1	0.065
YIL103W	DPH1	YGR279C	SCW4	0.065
YIL103W	DPH1	YHR133C	NSG1	0.065
YIL103W	DPH1	YJR014W	TMA22	0.065
YIL103W	DPH1	YML051W	GAL80	0.065
YIL103W	DPH1	YOL089C	HAL9	0.065
YIL103W	DPH1	YOR140W	SFL1	0.065
YIL103W	DPH1	YOR298C-A	MBF1	0.065
YIL103W	DPH1	YDR282C	YDR282C	0.064
YIL103W	DPH1	YGR207C	YGR207C	0.064
YIL103W	DPH1	YHR182W	YHR182W	0.064
YIL103W	DPH1	YJR095W	SFC1	0.064
YIL103W	DPH1	YJR103W	URA8	0.064
YIL103W	DPH1	YKR014C	YPT52	0.064
YIL103W	DPH1	YLR114C	AVL9	0.064
YIL103W	DPH1	YMR162C	DNF3	0.064
YIL103W	DPH1	YPL091W	GLR1	0.064
YIL103W	DPH1	YDR150W	NUM1	0.063
YIL103W	DPH1	YER078C	ICP55	0.063
YIL103W	DPH1	YIL038C	NOT3	0.063
YIL103W	DPH1	YIL058W	YIL058W	0.063
YIL103W	DPH1	YJR025C	BNA1	0.063
YIL103W	DPH1	YJR130C	STR2	0.063
YIL103W	DPH1	YLL028W	TPO1	0.063
YIL103W	DPH1	YML096W	YML096W	0.063
YIL103W	DPH1	YMR266W	RSN1	0.063
YIL103W	DPH1	YOL003C	PFA4	0.063
YIL103W	DPH1	YBL102W	SFT2	0.062
YIL103W	DPH1	YBR185C	MBA1	0.062
YIL103W	DPH1	YDR072C	IPT1	0.062
YIL103W	DPH1	YDR120C	TRM1	0.062
YIL103W	DPH1	YDR424C	DYN2	0.062
YIL103W	DPH1	YDR431W	YDR431W	0.062
YIL103W	DPH1	YGL079W	YGL079W	0.062
YIL103W	DPH1	YJL137C	GLG2	0.062
YIL103W	DPH1	YKL043W	PHD1	0.062
YIL103W	DPH1	YKL168C	KKQ8	0.062
YIL103W	DPH1	YLL006W	MMM1	0.062
YIL103W	DPH1	YMR075W	RCO1	0.062
YIL103W	DPH1	YMR092C	AIP1	0.062
YIL103W	DPH1	YMR109W	MYO5	0.062
YIL103W	DPH1	YNR060W	FRE4	0.062
YIL103W	DPH1	YOL007C	CSI2	0.062
YIL103W	DPH1	YDR528W	HLR1	0.061
YIL103W	DPH1	YGL114W	YGL114W	0.061
YIL103W	DPH1	YGR223C	HSV2	0.061
YIL103W	DPH1	YHR191C	CTF8	0.061
YIL103W	DPH1	YLR152C	YLR152C	0.061
YIL103W	DPH1	YLR441C	RPS1A	0.061
YIL103W	DPH1	YOL030W	GAS5	0.061
YIL103W	DPH1	YOR123C	LEO1	0.061
YIL103W	DPH1	YPL253C	VIK1	0.061
YIL103W	DPH1	YBR022W	POA1	0.06
YIL103W	DPH1	YBR051W	YBR051W	0.06
YIL103W	DPH1	YBR230C	OM14	0.06
YIL103W	DPH1	YDR272W	GLO2	0.06
YIL103W	DPH1	YDR446W	ECM11	0.06
YIL103W	DPH1	YGR035C	YGR035C	0.06
YIL103W	DPH1	YHR061C	GIC1	0.06
YIL103W	DPH1	YJL115W	ASF1	0.06
YIL103W	DPH1	YJR078W	BNA2	0.06
YIL103W	DPH1	YKL074C	MUD2	0.06
YIL103W	DPH1	YKR010C	TOF2	0.06
YIL103W	DPH1	YLL024C	SSA2	0.06
YIL103W	DPH1	YLR460C	YLR460C	0.06
YIL103W	DPH1	YMR063W	RIM9	0.06
YIL103W	DPH1	YMR095C	SNO1	0.06
YIL103W	DPH1	YPL062W	YPL062W	0.06
YIL103W	DPH1	YBR164C	ARL1	0.059
YIL103W	DPH1	YBR199W	KTR4	0.059
YIL103W	DPH1	YBR200W	BEM1	0.059
YIL103W	DPH1	YDR263C	DIN7	0.059
YIL103W	DPH1	YFL035C-B	YFL035C-B	0.059
YIL103W	DPH1	YGL042C	YGL042C	0.059
YIL103W	DPH1	YIL001W	YIL001W	0.059
YIL103W	DPH1	YIL090W	ICE2	0.059
YIL103W	DPH1	YIL138C	TPM2	0.059
YIL103W	DPH1	YJR129C	YJR129C	0.059
YIL103W	DPH1	YKL106W	AAT1	0.059
YIL103W	DPH1	YLR353W	BUD8	0.059
YIL103W	DPH1	YMR216C	SKY1	0.059
YIL103W	DPH1	YNL056W	OCA2	0.059
YIL103W	DPH1	YNL065W	AQR1	0.059
YIL103W	DPH1	YAL030W	SNC1	0.058
YIL103W	DPH1	YER183C	FAU1	0.058
YIL103W	DPH1	YIR002C	MPH1	0.058
YIL103W	DPH1	YIR020W-B	YIR020W-B	0.058
YIL103W	DPH1	YKR098C	UBP11	0.058
YIL103W	DPH1	YLR041W	YLR041W	0.058
YIL103W	DPH1	YLR395C	COX8	0.058
YIL103W	DPH1	YMR036C	MIH1	0.058
YIL103W	DPH1	YMR116C	ASC1	0.058
YIL103W	DPH1	YNL009W	IDP3	0.058
YIL103W	DPH1	YOR043W	WHI2	0.058
YIL103W	DPH1	YOR384W	FRE5	0.058
YIL103W	DPH1	YBR194W	AIM4	0.057
YIL103W	DPH1	YDR156W	RPA14	0.057
YIL103W	DPH1	YGL257C	MNT2	0.057
YIL103W	DPH1	YHR078W	YHR078W	0.057
YIL103W	DPH1	YHR087W	RTC3	0.057
YIL103W	DPH1	YIL087C	LRC2	0.057
YIL103W	DPH1	YJL038C	LOH1	0.057
YIL103W	DPH1	YPL027W	SMA1	0.057
YIL103W	DPH1	YBR212W	NGR1	0.056
YIL103W	DPH1	YBR280C	SAF1	0.056
YIL103W	DPH1	YCL025C	AGP1	0.056
YIL103W	DPH1	YDL174C	DLD1	0.056
YIL103W	DPH1	YDR014W	RAD61	0.056
YIL103W	DPH1	YDR149C	YDR149C	0.056
YIL103W	DPH1	YDR326C	YSP2	0.056
YIL103W	DPH1	YDR408C	ADE8	0.056
YIL103W	DPH1	YER090W	TRP2	0.056
YIL103W	DPH1	YFR010W	UBP6	0.056
YIL103W	DPH1	YGL094C	PAN2	0.056
YIL103W	DPH1	YJR047C	ANB1	0.056
YIL103W	DPH1	YJR146W	YJR146W	0.056
YIL103W	DPH1	YLR227C	ADY4	0.056
YIL103W	DPH1	YLR255C	YLR255C	0.056
YIL103W	DPH1	YLR389C	STE23	0.056
YIL103W	DPH1	YLR398C	SKI2	0.056
YIL103W	DPH1	YML002W	YML002W	0.056
YIL103W	DPH1	YNL001W	DOM34	0.056
YIL103W	DPH1	YNL024C	YNL024C	0.056
YIL103W	DPH1	YNL096C	RPS7B	0.056
YIL103W	DPH1	YNL116W	DMA2	0.056
YIL103W	DPH1	YPL236C	ENV7	0.056
YIL103W	DPH1	YBL001C	ECM15	0.055
YIL103W	DPH1	YDL199C	YDL199C	0.055
YIL103W	DPH1	YDR242W	AMD2	0.055
YIL103W	DPH1	YDR249C	YDR249C	0.055
YIL103W	DPH1	YER156C	YER156C	0.055
YIL103W	DPH1	YIL117C	PRM5	0.055
YIL103W	DPH1	YIR003W	AIM21	0.055
YIL103W	DPH1	YJL216C	YJL216C	0.055
YIL103W	DPH1	YKL081W	TEF4	0.055
YIL103W	DPH1	YLL043W	FPS1	0.055
YIL103W	DPH1	YLR087C	CSF1	0.055
YIL103W	DPH1	YLR191W	PEX13	0.055
YIL103W	DPH1	YLR334C	YLR334C	0.055
YIL103W	DPH1	YML111W	BUL2	0.055
YIL103W	DPH1	YNL012W	SPO1	0.055
YIL103W	DPH1	YOR269W	PAC1	0.055
YIL103W	DPH1	YPL179W	PPQ1	0.055
YIL103W	DPH1	YBR025C	OLA1	0.054
YIL103W	DPH1	YBR075W	YBR075W	0.054
YIL103W	DPH1	YDR094W	YDR094W	0.054
YIL103W	DPH1	YER042W	MXR1	0.054
YIL103W	DPH1	YGR052W	FMP48	0.054
YIL103W	DPH1	YHL040C	ARN1	0.054
YIL103W	DPH1	YHR075C	PPE1	0.054
YIL103W	DPH1	YHR150W	PEX28	0.054
YIL103W	DPH1	YHR189W	PTH1	0.054
YIL103W	DPH1	YIL160C	POT1	0.054
YIL103W	DPH1	YKL079W	SMY1	0.054
YIL103W	DPH1	YKR106W	YKR106W	0.054
YIL103W	DPH1	YLR394W	CST9	0.054
YIL103W	DPH1	YNL074C	MLF3	0.054
YIL103W	DPH1	YOL044W	PEX15	0.054
YIL103W	DPH1	YOL085C	YOL085C	0.054
YIL103W	DPH1	YPL174C	NIP100	0.054
YIL103W	DPH1	YPL183C	RTT10	0.054
YIL103W	DPH1	YAL055W	PEX22	0.053
YIL103W	DPH1	YBR242W	YBR242W	0.053
YIL103W	DPH1	YDL051W	LHP1	0.053
YIL103W	DPH1	YDL081C	RPP1A	0.053
YIL103W	DPH1	YDR124W	YDR124W	0.053
YIL103W	DPH1	YGL210W	YPT32	0.053
YIL103W	DPH1	YIL066C	RNR3	0.053
YIL103W	DPH1	YKR078W	YKR078W	0.053
YIL103W	DPH1	YOL153C	YOL153C	0.053
YIL103W	DPH1	YAL011W	SWC3	0.052
YIL103W	DPH1	YBL101C	ECM21	0.052
YIL103W	DPH1	YDR093W	DNF2	0.052
YIL103W	DPH1	YDR181C	SAS4	0.052
YIL103W	DPH1	YDR184C	ATC1	0.052
YIL103W	DPH1	YDR315C	IPK1	0.052
YIL103W	DPH1	YDR321W	ASP1	0.052
YIL103W	DPH1	YER059W	PCL6	0.052
YIL103W	DPH1	YFL046W	FMP32	0.052
YIL103W	DPH1	YGR021W	YGR021W	0.052
YIL103W	DPH1	YIL064W	SEE1	0.052
YIL103W	DPH1	YJR062C	NTA1	0.052
YIL103W	DPH1	YKL005C	BYE1	0.052
YIL103W	DPH1	YKL090W	CUE2	0.052
YIL103W	DPH1	YKR099W	BAS1	0.052
YIL103W	DPH1	YLR352W	YLR352W	0.052
YIL103W	DPH1	YMR274C	RCE1	0.052
YIL103W	DPH1	YNL066W	SUN4	0.052
YIL103W	DPH1	YAL029C	MYO4	0.051
YIL103W	DPH1	YBR016W	YBR016W	0.051
YIL103W	DPH1	YBR116C	YBR116C	0.051
YIL103W	DPH1	YBR272C	HSM3	0.051
YIL103W	DPH1	YCL035C	GRX1	0.051
YIL103W	DPH1	YHR113W	YHR113W	0.051
YIL103W	DPH1	YHR167W	THP2	0.051
YIL103W	DPH1	YJR050W	ISY1	0.051
YIL103W	DPH1	YLL012W	YEH1	0.051
YIL103W	DPH1	YLR046C	YLR046C	0.051
YIL103W	DPH1	YLR279W	YLR279W	0.051
YIL103W	DPH1	YMR075C-A	YMR075C-A	0.051
YIL103W	DPH1	YMR191W	SPG5	0.051
YIL103W	DPH1	YMR222C	FSH2	0.051
YIL103W	DPH1	YOL019W	YOL019W	0.051
YIL103W	DPH1	YOL112W	MSB4	0.051
YIL103W	DPH1	YOR038C	HIR2	0.051
YIL103W	DPH1	YPL120W	VPS30	0.051
YIL103W	DPH1	YPL258C	THI21	0.051
YIL103W	DPH1	YBL062W	YBL062W	0.05
YIL103W	DPH1	YBR299W	MAL32	0.05
YIL103W	DPH1	YCL049C	YCL049C	0.05
YIL103W	DPH1	YDR259C	YAP6	0.05
YIL103W	DPH1	YDR261C	EXG2	0.05
YIL103W	DPH1	YGL089C	MF(ALPHA)2	0.05
YIL103W	DPH1	YGR072W	UPF3	0.05
YIL103W	DPH1	YGR226C	YGR226C	0.05
YIL103W	DPH1	YHR132C	ECM14	0.05
YIL103W	DPH1	YKR033C	YKR033C	0.05
YIL103W	DPH1	YKR097W	PCK1	0.05
YIL103W	DPH1	YLR248W	RCK2	0.05
YIL103W	DPH1	YLR341W	SPO77	0.05
YIL103W	DPH1	YMR114C	YMR114C	0.05
YIL103W	DPH1	YNR048W	YNR048W	0.05
YIL103W	DPH1	YOR284W	HUA2	0.05
YIL103W	DPH1	YPL123C	RNY1	0.05
YIL103W	DPH1	YBR245C	ISW1	0.049
YIL103W	DPH1	YDL234C	GYP7	0.049
YIL103W	DPH1	YDR146C	SWI5	0.049
YIL103W	DPH1	YDR155C	CPR1	0.049
YIL103W	DPH1	YER065C	ICL1	0.049
YIL103W	DPH1	YFL052W	YFL052W	0.049
YIL103W	DPH1	YFL053W	DAK2	0.049
YIL103W	DPH1	YGR080W	TWF1	0.049
YIL103W	DPH1	YHR151C	MTC6	0.049
YIL103W	DPH1	YIR033W	MGA2	0.049
YIL103W	DPH1	YJL122W	ALB1	0.049
YIL103W	DPH1	YJR024C	MDE1	0.049
YIL103W	DPH1	YJR135C	MCM22	0.049
YIL103W	DPH1	YLL002W	RTT109	0.049
YIL103W	DPH1	YLR171W	YLR171W	0.049
YIL103W	DPH1	YLR410W	VIP1	0.049
YIL103W	DPH1	YML018C	YML018C	0.049
YIL103W	DPH1	YMR245W	YMR245W	0.049
YIL103W	DPH1	YMR294W-A	YMR294W-A	0.049
YIL103W	DPH1	YNL156C	NSG2	0.049
YIL103W	DPH1	YOR015W	YOR015W	0.049
YIL103W	DPH1	YOR334W	MRS2	0.049
YIL103W	DPH1	YPL116W	HOS3	0.049
YIL103W	DPH1	YPL241C	CIN2	0.049
YIL103W	DPH1	YPR075C	OPY2	0.049
YIL103W	DPH1	YAR030C	YAR030C	0.048
YIL103W	DPH1	YBL046W	PSY4	0.048
YIL103W	DPH1	YBR066C	NRG2	0.048
YIL103W	DPH1	YBR182C	SMP1	0.048
YIL103W	DPH1	YDL083C	RPS16B	0.048
YIL103W	DPH1	YDL124W	YDL124W	0.048
YIL103W	DPH1	YDL204W	RTN2	0.048
YIL103W	DPH1	YDR097C	MSH6	0.048
YIL103W	DPH1	YDR099W	BMH2	0.048
YIL103W	DPH1	YDR312W	SSF2	0.048
YIL103W	DPH1	YGR079W	YGR079W	0.048
YIL103W	DPH1	YHR059W	FYV4	0.048
YIL103W	DPH1	YIL132C	CSM2	0.048
YIL103W	DPH1	YJL158C	CIS3	0.048
YIL103W	DPH1	YKR009C	FOX2	0.048
YIL103W	DPH1	YLL047W	YLL047W	0.048
YIL103W	DPH1	YLR449W	FPR4	0.048
YIL103W	DPH1	YPL057C	SUR1	0.048
YIL103W	DPH1	YPL245W	YPL245W	0.048
YIL103W	DPH1	YPR130C	YPR130C	0.048
YIL103W	DPH1	YBL013W	FMT1	0.047
YIL103W	DPH1	YBR067C	TIP1	0.047
YIL103W	DPH1	YDR508C	GNP1	0.047
YIL103W	DPH1	YER151C	UBP3	0.047
YIL103W	DPH1	YGR131W	YGR131W	0.047
YIL103W	DPH1	YKL217W	JEN1	0.047
YIL103W	DPH1	YLR089C	ALT1	0.047
YIL103W	DPH1	YLR446W	YLR446W	0.047
YIL103W	DPH1	YML035C-A	YML035C-A	0.047
YIL103W	DPH1	YML116W	ATR1	0.047
YIL103W	DPH1	YMR022W	UBC7	0.047
YIL103W	DPH1	YNL050C	YNL050C	0.047
YIL103W	DPH1	YOL031C	SIL1	0.047
YIL103W	DPH1	YOR030W	DFG16	0.047
YIL103W	DPH1	YOR044W	IRC23	0.047
YIL103W	DPH1	YOR091W	TMA46	0.047
YIL103W	DPH1	YPL106C	SSE1	0.047
YIL103W	DPH1	YBL024W	NCL1	0.046
YIL103W	DPH1	YBR064W	YBR064W	0.046
YIL103W	DPH1	YBR187W	GDT1	0.046
YIL103W	DPH1	YCL016C	DCC1	0.046
YIL103W	DPH1	YDL094C	YDL094C	0.046
YIL103W	DPH1	YDL161W	ENT1	0.046
YIL103W	DPH1	YDR183W	PLP1	0.046
YIL103W	DPH1	YDR229W	IVY1	0.046
YIL103W	DPH1	YER135C	YER135C	0.046
YIL103W	DPH1	YGL151W	NUT1	0.046
YIL103W	DPH1	YGL163C	RAD54	0.046
YIL103W	DPH1	YGL165C	YGL165C	0.046
YIL103W	DPH1	YGR077C	PEX8	0.046
YIL103W	DPH1	YGR268C	HUA1	0.046
YIL103W	DPH1	YJL142C	IRC9	0.046
YIL103W	DPH1	YKL179C	COY1	0.046
YIL103W	DPH1	YKL187C	YKL187C	0.046
YIL103W	DPH1	YLL001W	DNM1	0.046
YIL103W	DPH1	YLR092W	SUL2	0.046
YIL103W	DPH1	YNL058C	YNL058C	0.046
YIL103W	DPH1	YNL146W	YNL146W	0.046
YIL103W	DPH1	YOL006C	TOP1	0.046
YIL103W	DPH1	YOR061W	CKA2	0.046
YIL103W	DPH1	YPL227C	ALG5	0.046
YIL103W	DPH1	YPL250C	ICY2	0.046
YIL103W	DPH1	YPR001W	CIT3	0.046
YIL103W	DPH1	YAL023C	PMT2	0.045
YIL103W	DPH1	YBL059W	YBL059W	0.045
YIL103W	DPH1	YBR032W	YBR032W	0.045
YIL103W	DPH1	YDL010W	GRX6	0.045
YIL103W	DPH1	YDR070C	FMP16	0.045
YIL103W	DPH1	YDR251W	PAM1	0.045
YIL103W	DPH1	YDR318W	MCM21	0.045
YIL103W	DPH1	YHR077C	NMD2	0.045
YIL103W	DPH1	YKL185W	ASH1	0.045
YIL103W	DPH1	YKR100C	SKG1	0.045
YIL103W	DPH1	YLR164W	YLR164W	0.045
YIL103W	DPH1	YML047C	PRM6	0.045
YIL103W	DPH1	YOR031W	CRS5	0.045
YIL103W	DPH1	YPR109W	YPR109W	0.045
YIL103W	DPH1	YBL069W	AST1	0.044
YIL103W	DPH1	YBR276C	PPS1	0.044
YIL103W	DPH1	YBR288C	APM3	0.044
YIL103W	DPH1	YCL051W	LRE1	0.044
YIL103W	DPH1	YCR061W	YCR061W	0.044
YIL103W	DPH1	YDL059C	RAD59	0.044
YIL103W	DPH1	YDR401W	YDR401W	0.044
YIL103W	DPH1	YDR445C	YDR445C	0.044
YIL103W	DPH1	YER124C	DSE1	0.044
YIL103W	DPH1	YER130C	COM2	0.044
YIL103W	DPH1	YGL043W	DST1	0.044
YIL103W	DPH1	YIR025W	MND2	0.044
YIL103W	DPH1	YIR027C	DAL1	0.044
YIL103W	DPH1	YJL150W	YJL150W	0.044
YIL103W	DPH1	YKR054C	DYN1	0.044
YIL103W	DPH1	YLR218C	YLR218C	0.044
YIL103W	DPH1	YLR408C	YLR408C	0.044
YIL103W	DPH1	YML016C	PPZ1	0.044
YIL103W	DPH1	YML099C	ARG81	0.044
YIL103W	DPH1	YMR030W	RSF1	0.044
YIL103W	DPH1	YMR311C	GLC8	0.044
YIL103W	DPH1	YNL023C	FAP1	0.044
YIL103W	DPH1	YNL157W	IGO1	0.044
YIL103W	DPH1	YNR034W	SOL1	0.044
YIL103W	DPH1	YOR037W	CYC2	0.044
YIL103W	DPH1	YOR053W	YOR053W	0.044
YIL103W	DPH1	YOR248W	YOR248W	0.044
YIL103W	DPH1	YPL180W	TCO89	0.044
YIL103W	DPH1	YBL043W	ECM13	0.043
YIL103W	DPH1	YBL051C	PIN4	0.043
YIL103W	DPH1	YBL061C	SKT5	0.043
YIL103W	DPH1	YBR150C	TBS1	0.043
YIL103W	DPH1	YDR402C	DIT2	0.043
YIL103W	DPH1	YER053C	PIC2	0.043
YIL103W	DPH1	YER091C-A	YER091C-A	0.043
YIL103W	DPH1	YGR184C	UBR1	0.043
YIL103W	DPH1	YKL167C	MRP49	0.043
YIL103W	DPH1	YLL015W	BPT1	0.043
YIL103W	DPH1	YMR317W	YMR317W	0.043
YIL103W	DPH1	YOL101C	IZH4	0.043
YIL103W	DPH1	YOR071C	NRT1	0.043
YIL103W	DPH1	YOR379C	YOR379C	0.043
YIL103W	DPH1	YPL119C	DBP1	0.043
YIL103W	DPH1	YPL221W	FLC1	0.043
YIL103W	DPH1	YPL270W	MDL2	0.043
YIL103W	DPH1	YPR040W	TIP41	0.043
YIL103W	DPH1	YCL023C	YCL023C	0.042
YIL103W	DPH1	YDL112W	TRM3	0.042
YIL103W	DPH1	YDL113C	ATG20	0.042
YIL103W	DPH1	YDL210W	UGA4	0.042
YIL103W	DPH1	YGR221C	TOS2	0.042
YIL103W	DPH1	YHR095W	YHR095W	0.042
YIL103W	DPH1	YHR129C	ARP1	0.042
YIL103W	DPH1	YJL182C	YJL182C	0.042
YIL103W	DPH1	YKL007W	CAP1	0.042
YIL103W	DPH1	YLR017W	MEU1	0.042
YIL103W	DPH1	YLR401C	DUS3	0.042
YIL103W	DPH1	YML113W	DAT1	0.042
YIL103W	DPH1	YMR065W	KAR5	0.042
YIL103W	DPH1	YNR001C	CIT1	0.042
YIL103W	DPH1	YNR032C-A	HUB1	0.042
YIL103W	DPH1	YOL129W	VPS68	0.042
YIL103W	DPH1	YOL152W	FRE7	0.042
YIL103W	DPH1	YOR024W	YOR024W	0.042
YIL103W	DPH1	YOR126C	IAH1	0.042
YIL103W	DPH1	YBL098W	BNA4	0.041
YIL103W	DPH1	YBR100W	YBR100W	0.041
YIL103W	DPH1	YDR265W	PEX10	0.041
YIL103W	DPH1	YDR317W	HIM1	0.041
YIL103W	DPH1	YDR368W	YPR1	0.041
YIL103W	DPH1	YFL054C	YFL054C	0.041
YIL103W	DPH1	YHR006W	STP2	0.041
YIL103W	DPH1	YHR198C	AIM18	0.041
YIL103W	DPH1	YIL067C	YIL067C	0.041
YIL103W	DPH1	YJL136C	RPS21B	0.041
YIL103W	DPH1	YJL187C	SWE1	0.041
YIL103W	DPH1	YLR418C	CDC73	0.041
YIL103W	DPH1	YML054C	CYB2	0.041
YIL103W	DPH1	YMR003W	AIM34	0.041
YIL103W	DPH1	YMR006C	PLB2	0.041
YIL103W	DPH1	YNL089C	YNL089C	0.041
YIL103W	DPH1	YOR324C	FRT1	0.041
YIL103W	DPH1	YPL261C	YPL261C	0.041
YIL103W	DPH1	YPR046W	MCM16	0.041
YIL103W	DPH1	YPR196W	YPR196W	0.041
YIL103W	DPH1	YDR285W	ZIP1	0.04
YIL103W	DPH1	YDR351W	SBE2	0.04
YIL103W	DPH1	YDR503C	LPP1	0.04
YIL103W	DPH1	YGL258W	VEL1	0.04
YIL103W	DPH1	YGR086C	PIL1	0.04
YIL103W	DPH1	YGR194C	XKS1	0.04
YIL103W	DPH1	YHR057C	CPR2	0.04
YIL103W	DPH1	YHR111W	UBA4	0.04
YIL103W	DPH1	YHR142W	CHS7	0.04
YIL103W	DPH1	YIL053W	RHR2	0.04
YIL103W	DPH1	YIL073C	SPO22	0.04
YIL103W	DPH1	YKL127W	PGM1	0.04
YIL103W	DPH1	YKL190W	CNB1	0.04
YIL103W	DPH1	YNR039C	ZRG17	0.04
YIL103W	DPH1	YOL099C	YOL099C	0.04
YIL103W	DPH1	YOR367W	SCP1	0.04
YIL103W	DPH1	YPR052C	NHP6A	0.04
YIL103W	DPH1	YBL083C	YBL083C	0.039
YIL103W	DPH1	YBR134W	YBR134W	0.039
YIL103W	DPH1	YDR006C	SOK1	0.039
YIL103W	DPH1	YGR284C	ERV29	0.039
YIL103W	DPH1	YJL151C	SNA3	0.039
YIL103W	DPH1	YJL159W	HSP150	0.039
YIL103W	DPH1	YKL062W	MSN4	0.039
YIL103W	DPH1	YKL075C	YKL075C	0.039
YIL103W	DPH1	YKL149C	DBR1	0.039
YIL103W	DPH1	YKL221W	MCH2	0.039
YIL103W	DPH1	YKR013W	PRY2	0.039
YIL103W	DPH1	YKR028W	SAP190	0.039
YIL103W	DPH1	YLR216C	CPR6	0.039
YIL103W	DPH1	YLR360W	VPS38	0.039
YIL103W	DPH1	YLR385C	SWC7	0.039
YIL103W	DPH1	YMR023C	MSS1	0.039
YIL103W	DPH1	YMR104C	YPK2	0.039
YIL103W	DPH1	YMR158C-A	YMR158C-A	0.039
YIL103W	DPH1	YMR292W	GOT1	0.039
YIL103W	DPH1	YNL003C	PET8	0.039
YIL103W	DPH1	YOL087C	DUF1	0.039
YIL103W	DPH1	YOR270C	VPH1	0.039
YIL103W	DPH1	YPL262W	FUM1	0.039
YIL103W	DPH1	YPR114W	YPR114W	0.039
YIL103W	DPH1	YPR189W	SKI3	0.039
YIL103W	DPH1	YBR147W	RTC2	0.038
YIL103W	DPH1	YBR255W	MTC4	0.038
YIL103W	DPH1	YBR277C	YBR277C	0.038
YIL103W	DPH1	YCL024W	KCC4	0.038
YIL103W	DPH1	YCL057W	PRD1	0.038
YIL103W	DPH1	YDR142C	PEX7	0.038
YIL103W	DPH1	YDR378C	LSM6	0.038
YIL103W	DPH1	YER118C	SHO1	0.038
YIL103W	DPH1	YFL034C-A	RPL22B	0.038
YIL103W	DPH1	YGL235W	YGL235W	0.038
YIL103W	DPH1	YGR133W	PEX4	0.038
YIL103W	DPH1	YIL032C	YIL032C	0.038
YIL103W	DPH1	YJL007C	YJL007C	0.038
YIL103W	DPH1	YJR083C	ACF4	0.038
YIL103W	DPH1	YKL001C	MET14	0.038
YIL103W	DPH1	YKL029C	MAE1	0.038
YIL103W	DPH1	YKL121W	DGR2	0.038
YIL103W	DPH1	YKL197C	PEX1	0.038
YIL103W	DPH1	YKL212W	SAC1	0.038
YIL103W	DPH1	YMR173W	DDR48	0.038
YIL103W	DPH1	YNL099C	OCA1	0.038
YIL103W	DPH1	YOL049W	GSH2	0.038
YIL103W	DPH1	YOR296W	YOR296W	0.038
YIL103W	DPH1	YPL017C	IRC15	0.038
YIL103W	DPH1	YPL194W	DDC1	0.038
YIL103W	DPH1	YPR066W	UBA3	0.038
YIL103W	DPH1	YAL010C	MDM10	0.037
YIL103W	DPH1	YBR057C	MUM2	0.037
YIL103W	DPH1	YBR286W	APE3	0.037
YIL103W	DPH1	YCL050C	APA1	0.037
YIL103W	DPH1	YDL222C	FMP45	0.037
YIL103W	DPH1	YDR128W	MTC5	0.037
YIL103W	DPH1	YDR348C	YDR348C	0.037
YIL103W	DPH1	YGR085C	RPL11B	0.037
YIL103W	DPH1	YGR087C	PDC6	0.037
YIL103W	DPH1	YHL045W	YHL045W	0.037
YIL103W	DPH1	YHR114W	BZZ1	0.037
YIL103W	DPH1	YIL135C	VHS2	0.037
YIL103W	DPH1	YIL137C	TMA108	0.037
YIL103W	DPH1	YKL066W	YKL066W	0.037
YIL103W	DPH1	YKL174C	TPO5	0.037
YIL103W	DPH1	YKL205W	LOS1	0.037
YIL103W	DPH1	YKR030W	GMH1	0.037
YIL103W	DPH1	YKR084C	HBS1	0.037
YIL103W	DPH1	YLR083C	EMP70	0.037
YIL103W	DPH1	YLR102C	APC9	0.037
YIL103W	DPH1	YLR214W	FRE1	0.037
YIL103W	DPH1	YMR087W	YMR087W	0.037
YIL103W	DPH1	YNL121C	TOM70	0.037
YIL103W	DPH1	YNR059W	MNT4	0.037
YIL103W	DPH1	YNR071C	YNR071C	0.037
YIL103W	DPH1	YOR105W	YOR105W	0.037
YIL103W	DPH1	YOR311C	DGK1	0.037
YIL103W	DPH1	YPL032C	SVL3	0.037
YIL103W	DPH1	YPR070W	MED1	0.037
YIL103W	DPH1	YAL051W	OAF1	0.036
YIL103W	DPH1	YAL064C-A	YAL064C-A	0.036
YIL103W	DPH1	YBR169C	SSE2	0.036
YIL103W	DPH1	YBR210W	ERV15	0.036
YIL103W	DPH1	YCL029C	BIK1	0.036
YIL103W	DPH1	YCR045C	YCR045C	0.036
YIL103W	DPH1	YDL176W	YDL176W	0.036
YIL103W	DPH1	YDR026C	YDR026C	0.036
YIL103W	DPH1	YDR077W	SED1	0.036
YIL103W	DPH1	YER081W	SER3	0.036
YIL103W	DPH1	YER134C	YER134C	0.036
YIL103W	DPH1	YGR008C	STF2	0.036
YIL103W	DPH1	YHR181W	SVP26	0.036
YIL103W	DPH1	YIL158W	AIM20	0.036
YIL103W	DPH1	YJL212C	OPT1	0.036
YIL103W	DPH1	YKL216W	URA1	0.036
YIL103W	DPH1	YKR007W	MEH1	0.036
YIL103W	DPH1	YKR089C	TGL4	0.036
YIL103W	DPH1	YLR199C	PBA1	0.036
YIL103W	DPH1	YLR377C	FBP1	0.036
YIL103W	DPH1	YLR423C	ATG17	0.036
YIL103W	DPH1	YML011C	RAD33	0.036
YIL103W	DPH1	YML076C	WAR1	0.036
YIL103W	DPH1	YMR214W	SCJ1	0.036
YIL103W	DPH1	YMR291W	YMR291W	0.036
YIL103W	DPH1	YNL095C	YNL095C	0.036
YIL103W	DPH1	YOR225W	YOR225W	0.036
YIL103W	DPH1	YOR264W	DSE3	0.036
YIL103W	DPH1	YOR317W	FAA1	0.036
YIL103W	DPH1	YOR363C	PIP2	0.036
YIL103W	DPH1	YPR073C	LTP1	0.036
YIL103W	DPH1	YAL027W	SAW1	0.035
YIL103W	DPH1	YCL012W	YCL012W	0.035
YIL103W	DPH1	YCR073C	SSK22	0.035
YIL103W	DPH1	YDL203C	ACK1	0.035
YIL103W	DPH1	YDR294C	DPL1	0.035
YIL103W	DPH1	YGL041C	YGL041C	0.035
YIL103W	DPH1	YGR183C	QCR9	0.035
YIL103W	DPH1	YHL047C	ARN2	0.035
YIL103W	DPH1	YIL107C	PFK26	0.035
YIL103W	DPH1	YIL153W	RRD1	0.035
YIL103W	DPH1	YIL154C	IMP2'	0.035
YIL103W	DPH1	YJR127C	RSF2	0.035
YIL103W	DPH1	YKR003W	OSH6	0.035
YIL103W	DPH1	YLR015W	BRE2	0.035
YIL103W	DPH1	YLR303W	MET17	0.035
YIL103W	DPH1	YLR319C	BUD6	0.035
YIL103W	DPH1	YMR008C	PLB1	0.035
YIL103W	DPH1	YNL028W	YNL028W	0.035
YIL103W	DPH1	YNL076W	MKS1	0.035
YIL103W	DPH1	YOL013C	HRD1	0.035
YIL103W	DPH1	YOR286W	AIM42	0.035
YIL103W	DPH1	YOR357C	SNX3	0.035
YIL103W	DPH1	YPL071C	YPL071C	0.035
YIL103W	DPH1	YPL114W	YPL114W	0.035
YIL103W	DPH1	YPL164C	MLH3	0.035
YIL103W	DPH1	YPL226W	NEW1	0.035
YIL103W	DPH1	YPR090W	YPR090W	0.035
YIL103W	DPH1	YPR193C	HPA2	0.035
YIL103W	DPH1	YAL024C	LTE1	0.034
YIL103W	DPH1	YBR205W	KTR3	0.034
YIL103W	DPH1	YCR022C	YCR022C	0.034
YIL103W	DPH1	YDR387C	YDR387C	0.034
YIL103W	DPH1	YFL041W	FET5	0.034
YIL103W	DPH1	YGL158W	RCK1	0.034
YIL103W	DPH1	YGL255W	ZRT1	0.034
YIL103W	DPH1	YGR249W	MGA1	0.034
YIL103W	DPH1	YIL113W	SDP1	0.034
YIL103W	DPH1	YIL162W	SUC2	0.034
YIL103W	DPH1	YJL215C	YJL215C	0.034
YIL103W	DPH1	YJR020W	YJR020W	0.034
YIL103W	DPH1	YKL132C	RMA1	0.034
YIL103W	DPH1	YKR061W	KTR2	0.034
YIL103W	DPH1	YLR121C	YPS3	0.034
YIL103W	DPH1	YLR351C	NIT3	0.034
YIL103W	DPH1	YMR018W	YMR018W	0.034
YIL103W	DPH1	YMR119W	ASI1	0.034
YIL103W	DPH1	YOR171C	LCB4	0.034
YIL103W	DPH1	YOR368W	RAD17	0.034
YIL103W	DPH1	YPL018W	CTF19	0.034
YIL103W	DPH1	YPL156C	PRM4	0.034
YIL103W	DPH1	YPL171C	OYE3	0.034
YIL103W	DPH1	YAL028W	FRT2	0.033
YIL103W	DPH1	YAL058C-A	YAL058C-A	0.033
YIL103W	DPH1	YBR104W	YMC2	0.033
YIL103W	DPH1	YBR119W	MUD1	0.033
YIL103W	DPH1	YCL006C	YCL006C	0.033
YIL103W	DPH1	YDL025C	YDL025C	0.033
YIL103W	DPH1	YDL026W	YDL026W	0.033
YIL103W	DPH1	YDL172C	YDL172C	0.033
YIL103W	DPH1	YDR260C	SWM1	0.033
YIL103W	DPH1	YDR360W	OPI7	0.033
YIL103W	DPH1	YER096W	SHC1	0.033
YIL103W	DPH1	YGL084C	GUP1	0.033
YIL103W	DPH1	YGL180W	ATG1	0.033
YIL103W	DPH1	YGR129W	SYF2	0.033
YIL103W	DPH1	YHL037C	YHL037C	0.033
YIL103W	DPH1	YHR110W	ERP5	0.033
YIL103W	DPH1	YIL076W	SEC28	0.033
YIL103W	DPH1	YJL135W	YJL135W	0.033
YIL103W	DPH1	YKL077W	YKL077W	0.033
YIL103W	DPH1	YKL128C	PMU1	0.033
YIL103W	DPH1	YKL133C	YKL133C	0.033
YIL103W	DPH1	YKL201C	MNN4	0.033
YIL103W	DPH1	YLR130C	ZRT2	0.033
YIL103W	DPH1	YLR434C	YLR434C	0.033
YIL103W	DPH1	YML032C	RAD52	0.033
YIL103W	DPH1	YMR115W	MGR3	0.033
YIL103W	DPH1	YMR262W	YMR262W	0.033
YIL103W	DPH1	YNL004W	HRB1	0.033
YIL103W	DPH1	YOL047C	YOL047C	0.033
YIL103W	DPH1	YOL073C	YOL073C	0.033
YIL103W	DPH1	YOL081W	IRA2	0.033
YIL103W	DPH1	YOR049C	RSB1	0.033
YIL103W	DPH1	YOR082C	YOR082C	0.033
YIL103W	DPH1	YOR349W	CIN1	0.033
YIL103W	DPH1	YPL168W	YPL168W	0.033
YIL103W	DPH1	YPL170W	DAP1	0.033
YIL103W	DPH1	YPL224C	MMT2	0.033
YIL103W	DPH1	YPR006C	ICL2	0.033
YIL103W	DPH1	YPR135W	CTF4	0.033
YIL103W	DPH1	YPR145W	ASN1	0.033
YIL103W	DPH1	YBR188C	NTC20	0.032
YIL103W	DPH1	YBR223C	TDP1	0.032
YIL103W	DPH1	YDL206W	YDL206W	0.032
YIL103W	DPH1	YDR215C	YDR215C	0.032
YIL103W	DPH1	YER166W	DNF1	0.032
YIL103W	DPH1	YHL021C	AIM17	0.032
YIL103W	DPH1	YHR030C	SLT2	0.032
YIL103W	DPH1	YHR184W	SSP1	0.032
YIL103W	DPH1	YJL062W	LAS21	0.032
YIL103W	DPH1	YJL134W	LCB3	0.032
YIL103W	DPH1	YJR052W	RAD7	0.032
YIL103W	DPH1	YKL023W	YKL023W	0.032
YIL103W	DPH1	YLL005C	SPO75	0.032
YIL103W	DPH1	YLR450W	HMG2	0.032
YIL103W	DPH1	YMR044W	IOC4	0.032
YIL103W	DPH1	YMR121C	RPL15B	0.032
YIL103W	DPH1	YMR138W	CIN4	0.032
YIL103W	DPH1	YNR047W	FPK1	0.032
YIL103W	DPH1	YOL090W	MSH2	0.032
YIL103W	DPH1	YOR085W	OST3	0.032
YIL103W	DPH1	YOR144C	ELG1	0.032
YIL103W	DPH1	YOR193W	PEX27	0.032
YIL103W	DPH1	YPR111W	DBF20	0.032
YIL103W	DPH1	YPR126C	YPR126C	0.032
YIL103W	DPH1	YAR002W	NUP60	0.031
YIL103W	DPH1	YBR206W	YBR206W	0.031
YIL103W	DPH1	YDL036C	PUS9	0.031
YIL103W	DPH1	YDR057W	YOS9	0.031
YIL103W	DPH1	YDR153C	ENT5	0.031
YIL103W	DPH1	YFL040W	YFL040W	0.031
YIL103W	DPH1	YGL053W	PRM8	0.031
YIL103W	DPH1	YGL167C	PMR1	0.031
YIL103W	DPH1	YGL203C	KEX1	0.031
YIL103W	DPH1	YGR122W	YGR122W	0.031
YIL103W	DPH1	YIR007W	YIR007W	0.031
YIL103W	DPH1	YJL117W	PHO86	0.031
YIL103W	DPH1	YJR098C	YJR098C	0.031
YIL103W	DPH1	YKL177W	YKL177W	0.031
YIL103W	DPH1	YKL206C	ADD66	0.031
YIL103W	DPH1	YKR049C	FMP46	0.031
YIL103W	DPH1	YLL017W	YLL017W	0.031
YIL103W	DPH1	YLL046C	RNP1	0.031
YIL103W	DPH1	YLR035C	MLH2	0.031
YIL103W	DPH1	YLR038C	COX12	0.031
YIL103W	DPH1	YLR084C	RAX2	0.031
YIL103W	DPH1	YLR174W	IDP2	0.031
YIL103W	DPH1	YML052W	SUR7	0.031
YIL103W	DPH1	YMR103C	YMR103C	0.031
YIL103W	DPH1	YNL045W	YNL045W	0.031
YIL103W	DPH1	YNR075W	COS10	0.031
YIL103W	DPH1	YOL037C	YOL037C	0.031
YIL103W	DPH1	YOR003W	YSP3	0.031
YIL103W	DPH1	YOR008C-A	YOR008C-A	0.031
YIL103W	DPH1	YOR197W	MCA1	0.031
YIL103W	DPH1	YPL186C	UIP4	0.031
YIL103W	DPH1	YPR024W	YME1	0.031
YIL103W	DPH1	YPR039W	YPR039W	0.031
YIL103W	DPH1	YAL042W	ERV46	0.03
YIL103W	DPH1	YBL071C	YBL071C	0.03
YIL103W	DPH1	YBR207W	FTH1	0.03
YIL103W	DPH1	YBR220C	YBR220C	0.03
YIL103W	DPH1	YCR073W-A	SOL2	0.03
YIL103W	DPH1	YDL095W	PMT1	0.03
YIL103W	DPH1	YDL237W	LRC1	0.03
YIL103W	DPH1	YDR108W	GSG1	0.03
YIL103W	DPH1	YDR334W	SWR1	0.03
YIL103W	DPH1	YER056C	FCY2	0.03
YIL103W	DPH1	YGL067W	NPY1	0.03
YIL103W	DPH1	YGL148W	ARO2	0.03
YIL103W	DPH1	YGL249W	ZIP2	0.03
YIL103W	DPH1	YGR093W	DRN1	0.03
YIL103W	DPH1	YGR230W	BNS1	0.03
YIL103W	DPH1	YIL166C	YIL166C	0.03
YIL103W	DPH1	YJL045W	YJL045W	0.03
YIL103W	DPH1	YJR073C	OPI3	0.03
YIL103W	DPH1	YLR451W	LEU3	0.03
YIL103W	DPH1	YML009C	MRPL39	0.03
YIL103W	DPH1	YML050W	AIM32	0.03
YIL103W	DPH1	YML107C	PML39	0.03
YIL103W	DPH1	YMR283C	RIT1	0.03
YIL103W	DPH1	YNL147W	LSM7	0.03
YIL103W	DPH1	YOL126C	MDH2	0.03
YIL103W	DPH1	YPL138C	SPP1	0.03
YIL103W	DPH1	YBR023C	CHS3	0.029
YIL103W	DPH1	YBR224W	YBR224W	0.029
YIL103W	DPH1	YBR239C	ERT1	0.029
YIL103W	DPH1	YBR300C	YBR300C	0.029
YIL103W	DPH1	YCL062W	YCL062W	0.029
YIL103W	DPH1	YDL027C	YDL027C	0.029
YIL103W	DPH1	YDL136W	RPL35B	0.029
YIL103W	DPH1	YDR076W	RAD55	0.029
YIL103W	DPH1	YDR245W	MNN10	0.029
YIL103W	DPH1	YFL021W	GAT1	0.029
YIL103W	DPH1	YGL032C	AGA2	0.029
YIL103W	DPH1	YGL248W	PDE1	0.029
YIL103W	DPH1	YGR022C	YGR022C	0.029
YIL103W	DPH1	YGR117C	YGR117C	0.029
YIL103W	DPH1	YHR136C	SPL2	0.029
YIL103W	DPH1	YHR138C	YHR138C	0.029
YIL103W	DPH1	YIL098C	FMC1	0.029
YIL103W	DPH1	YIL140W	AXL2	0.029
YIL103W	DPH1	YIR001C	SGN1	0.029
YIL103W	DPH1	YJR059W	PTK2	0.029
YIL103W	DPH1	YKL140W	TGL1	0.029
YIL103W	DPH1	YLR093C	NYV1	0.029
YIL103W	DPH1	YLR284C	ECI1	0.029
YIL103W	DPH1	YLR330W	CHS5	0.029
YIL103W	DPH1	YML100W-A	YML100W-A	0.029
YIL103W	DPH1	YMR078C	CTF18	0.029
YIL103W	DPH1	YMR280C	CAT8	0.029
YIL103W	DPH1	YNL153C	GIM3	0.029
YIL103W	DPH1	YOL071W	EMI5	0.029
YIL103W	DPH1	YOR002W	ALG6	0.029
YIL103W	DPH1	YOR051C	YOR051C	0.029
YIL103W	DPH1	YPL022W	RAD1	0.029
YIL103W	DPH1	YBR197C	YBR197C	0.028
YIL103W	DPH1	YBR231C	SWC5	0.028
YIL103W	DPH1	YBR238C	YBR238C	0.028
YIL103W	DPH1	YDL127W	PCL2	0.028
YIL103W	DPH1	YDL142C	CRD1	0.028
YIL103W	DPH1	YDL178W	DLD2	0.028
YIL103W	DPH1	YER095W	RAD51	0.028
YIL103W	DPH1	YER108C	YER108C	0.028
YIL103W	DPH1	YFL034W	YFL034W	0.028
YIL103W	DPH1	YFR011C	AIM13	0.028
YIL103W	DPH1	YGL124C	MON1	0.028
YIL103W	DPH1	YGL198W	YIP4	0.028
YIL103W	DPH1	YGR281W	YOR1	0.028
YIL103W	DPH1	YHL008C	YHL008C	0.028
YIL103W	DPH1	YIL052C	RPL34B	0.028
YIL103W	DPH1	YJL100W	LSB6	0.028
YIL103W	DPH1	YJL183W	MNN11	0.028
YIL103W	DPH1	YJR079W	YJR079W	0.028
YIL103W	DPH1	YLR387C	REH1	0.028
YIL103W	DPH1	YML003W	YML003W	0.028
YIL103W	DPH1	YML033W	YML033W	0.028
YIL103W	DPH1	YMR055C	BUB2	0.028
YIL103W	DPH1	YMR264W	CUE1	0.028
YIL103W	DPH1	YMR305C	SCW10	0.028
YIL103W	DPH1	YNL136W	EAF7	0.028
YIL103W	DPH1	YOR280C	FSH3	0.028
YIL103W	DPH1	YOR306C	MCH5	0.028
YIL103W	DPH1	YPL014W	YPL014W	0.028
YIL103W	DPH1	YPL110C	GDE1	0.028
YIL103W	DPH1	YPR038W	IRC16	0.028
YIL103W	DPH1	YBR006W	UGA2	0.027
YIL103W	DPH1	YBR225W	YBR225W	0.027
YIL103W	DPH1	YCL032W	STE50	0.027
YIL103W	DPH1	YER188W	YER188W	0.027
YIL103W	DPH1	YGL002W	ERP6	0.027
YIL103W	DPH1	YHL014C	YLF2	0.027
YIL103W	DPH1	YHL019C	APM2	0.027
YIL103W	DPH1	YIL079C	AIR1	0.027
YIL103W	DPH1	YJL058C	BIT61	0.027
YIL103W	DPH1	YLR023C	IZH3	0.027
YIL103W	DPH1	YLR043C	TRX1	0.027
YIL103W	DPH1	YLR080W	EMP46	0.027
YIL103W	DPH1	YLR187W	SKG3	0.027
YIL103W	DPH1	YLR219W	MSC3	0.027
YIL103W	DPH1	YLR436C	ECM30	0.027
YIL103W	DPH1	YML028W	TSA1	0.027
YIL103W	DPH1	YMR118C	YMR118C	0.027
YIL103W	DPH1	YNL085W	MKT1	0.027
YIL103W	DPH1	YNL123W	NMA111	0.027
YIL103W	DPH1	YNR024W	MPP6	0.027
YIL103W	DPH1	YOR182C	RPS30B	0.027
YIL103W	DPH1	YPL189W	GUP2	0.027
YIL103W	DPH1	YPR200C	ARR2	0.027
YIL103W	DPH1	YBL106C	SRO77	0.026
YIL103W	DPH1	YBR108W	AIM3	0.026
YIL103W	DPH1	YBR175W	SWD3	0.026
YIL103W	DPH1	YDL167C	NRP1	0.026
YIL103W	DPH1	YDR273W	DON1	0.026
YIL103W	DPH1	YDR297W	SUR2	0.026
YIL103W	DPH1	YGL226C-A	OST5	0.026
YIL103W	DPH1	YHR046C	INM1	0.026
YIL103W	DPH1	YHR047C	AAP1	0.026
YIL103W	DPH1	YHR086W	NAM8	0.026
YIL103W	DPH1	YHR093W	AHT1	0.026
YIL103W	DPH1	YJR019C	TES1	0.026
YIL103W	DPH1	YKL009W	MRT4	0.026
YIL103W	DPH1	YKL115C	YKL115C	0.026
YIL103W	DPH1	YLR054C	OSW2	0.026
YIL103W	DPH1	YLR348C	DIC1	0.026
YIL103W	DPH1	YMR174C	PAI3	0.026
YIL103W	DPH1	YNL098C	RAS2	0.026
YIL103W	DPH1	YOL111C	MDY2	0.026
YIL103W	DPH1	YOR034C	AKR2	0.026
YIL103W	DPH1	YOR188W	MSB1	0.026
YIL103W	DPH1	YPL150W	YPL150W	0.026
YIL103W	DPH1	YBR034C	HMT1	0.025
YIL103W	DPH1	YBR215W	HPC2	0.025
YIL103W	DPH1	YDL070W	BDF2	0.025
YIL103W	DPH1	YDR095C	YDR095C	0.025
YIL103W	DPH1	YDR109C	YDR109C	0.025
YIL103W	DPH1	YDR380W	ARO10	0.025
YIL103W	DPH1	YDR509W	YDR509W	0.025
YIL103W	DPH1	YFR046C	CNN1	0.025
YIL103W	DPH1	YGL153W	PEX14	0.025
YIL103W	DPH1	YGL173C	KEM1	0.025
YIL103W	DPH1	YGR040W	KSS1	0.025
YIL103W	DPH1	YGR092W	DBF2	0.025
YIL103W	DPH1	YGR123C	PPT1	0.025
YIL103W	DPH1	YHR017W	YSC83	0.025
YIL103W	DPH1	YIL012W	YIL012W	0.025
YIL103W	DPH1	YIL074C	SER33	0.025
YIL103W	DPH1	YJL169W	YJL169W	0.025
YIL103W	DPH1	YKR090W	PXL1	0.025
YIL103W	DPH1	YLR183C	TOS4	0.025
YIL103W	DPH1	YLR194C	YLR194C	0.025
YIL103W	DPH1	YLR207W	HRD3	0.025
YIL103W	DPH1	YML060W	OGG1	0.025
YIL103W	DPH1	YNL071W	LAT1	0.025
YIL103W	DPH1	YNL086W	YNL086W	0.025
YIL103W	DPH1	YNR062C	YNR062C	0.025
YIL103W	DPH1	YOR097C	YOR097C	0.025
YIL103W	DPH1	YOR240W	YOR240W	0.025
YIL103W	DPH1	YAR023C	YAR023C	0.024
YIL103W	DPH1	YBR292C	YBR292C	0.024
YIL103W	DPH1	YCL042W	YCL042W	0.024
YIL103W	DPH1	YDL223C	HBT1	0.024
YIL103W	DPH1	YDR056C	YDR056C	0.024
YIL103W	DPH1	YDR400W	URH1	0.024
YIL103W	DPH1	YDR511W	ACN9	0.024
YIL103W	DPH1	YFR020W	YFR020W	0.024
YIL103W	DPH1	YFR035C	YFR035C	0.024
YIL103W	DPH1	YGL027C	CWH41	0.024
YIL103W	DPH1	YGL157W	YGL157W	0.024
YIL103W	DPH1	YHR043C	DOG2	0.024
YIL103W	DPH1	YJL165C	HAL5	0.024
YIL103W	DPH1	YJR058C	APS2	0.024
YIL103W	DPH1	YKL222C	YKL222C	0.024
YIL103W	DPH1	YMR026C	PEX12	0.024
YIL103W	DPH1	YMR035W	IMP2	0.024
YIL103W	DPH1	YMR048W	CSM3	0.024
YIL103W	DPH1	YNR010W	CSE2	0.024
YIL103W	DPH1	YNR030W	ALG12	0.024
YIL103W	DPH1	YOL027C	MDM38	0.024
YIL103W	DPH1	YOL036W	YOL036W	0.024
YIL103W	DPH1	YOR047C	STD1	0.024
YIL103W	DPH1	YOR072W	YOR072W	0.024
YIL103W	DPH1	YOR164C	GET4	0.024
YIL103W	DPH1	YOR177C	MPC54	0.024
YIL103W	DPH1	YOR291W	YPK9	0.024
YIL103W	DPH1	YPR076W	YPR076W	0.024
YIL103W	DPH1	YPR096C	YPR096C	0.024
YIL103W	DPH1	YBL027W	RPL19B	0.023
YIL103W	DPH1	YBL096C	YBL096C	0.023
YIL103W	DPH1	YBR094W	PBY1	0.023
YIL103W	DPH1	YBR103W	SIF2	0.023
YIL103W	DPH1	YCR016W	YCR016W	0.023
YIL103W	DPH1	YDR304C	CPR5	0.023
YIL103W	DPH1	YDR335W	MSN5	0.023
YIL103W	DPH1	YER149C	PEA2	0.023
YIL103W	DPH1	YGL221C	NIF3	0.023
YIL103W	DPH1	YHR117W	TOM71	0.023
YIL103W	DPH1	YHR156C	LIN1	0.023
YIL103W	DPH1	YIL036W	CST6	0.023
YIL103W	DPH1	YIL047C	SYG1	0.023
YIL103W	DPH1	YJR038C	YJR038C	0.023
YIL103W	DPH1	YKL020C	SPT23	0.023
YIL103W	DPH1	YKL147C	YKL147C	0.023
YIL103W	DPH1	YLL049W	LDB18	0.023
YIL103W	DPH1	YLL060C	GTT2	0.023
YIL103W	DPH1	YLR006C	SSK1	0.023
YIL103W	DPH1	YLR211C	YLR211C	0.023
YIL103W	DPH1	YLR363C	NMD4	0.023
YIL103W	DPH1	YLR367W	RPS22B	0.023
YIL103W	DPH1	YOR175C	ALE1	0.023
YIL103W	DPH1	YOR227W	HER1	0.023
YIL103W	DPH1	YPL033C	SRL4	0.023
YIL103W	DPH1	YPL133C	RDS2	0.023
YIL103W	DPH1	YPR014C	YPR014C	0.023
YIL103W	DPH1	YPR068C	HOS1	0.023
YIL103W	DPH1	YBL089W	AVT5	0.022
YIL103W	DPH1	YBR030W	RKM3	0.022
YIL103W	DPH1	YBR052C	RFS1	0.022
YIL103W	DPH1	YBR138C	YBR138C	0.022
YIL103W	DPH1	YBR201W	DER1	0.022
YIL103W	DPH1	YBR259W	YBR259W	0.022
YIL103W	DPH1	YCL026C-A	FRM2	0.022
YIL103W	DPH1	YDR107C	TMN2	0.022
YIL103W	DPH1	YDR480W	DIG2	0.022
YIL103W	DPH1	YDR541C	YDR541C	0.022
YIL103W	DPH1	YER066C-A	YER066C-A	0.022
YIL103W	DPH1	YER179W	DMC1	0.022
YIL103W	DPH1	YFR012W	YFR012W	0.022
YIL103W	DPH1	YGL057C	YGL057C	0.022
YIL103W	DPH1	YGL115W	SNF4	0.022
YIL103W	DPH1	YIL105C	SLM1	0.022
YIL103W	DPH1	YJL024C	APS3	0.022
YIL103W	DPH1	YJL103C	GSM1	0.022
YIL103W	DPH1	YJL168C	SET2	0.022
YIL103W	DPH1	YJR015W	YJR015W	0.022
YIL103W	DPH1	YKL117W	SBA1	0.022
YIL103W	DPH1	YKL150W	MCR1	0.022
YIL103W	DPH1	YLR190W	MMR1	0.022
YIL103W	DPH1	YLR220W	CCC1	0.022
YIL103W	DPH1	YMR111C	YMR111C	0.022
YIL103W	DPH1	YMR186W	HSC82	0.022
YIL103W	DPH1	YNR020C	ATP23	0.022
YIL103W	DPH1	YOR023C	AHC1	0.022
YIL103W	DPH1	YOR180C	DCI1	0.022
YIL103W	DPH1	YPL090C	RPS6A	0.022
YIL103W	DPH1	YAL017W	PSK1	0.021
YIL103W	DPH1	YBL028C	YBL028C	0.021
YIL103W	DPH1	YBR053C	YBR053C	0.021
YIL103W	DPH1	YBR297W	MAL33	0.021
YIL103W	DPH1	YCR082W	AHC2	0.021
YIL103W	DPH1	YDL188C	PPH22	0.021
YIL103W	DPH1	YDR018C	YDR018C	0.021
YIL103W	DPH1	YDR352W	YDR352W	0.021
YIL103W	DPH1	YDR354W	TRP4	0.021
YIL103W	DPH1	YDR491C	YDR491C	0.021
YIL103W	DPH1	YGL051W	MST27	0.021
YIL103W	DPH1	YGL216W	KIP3	0.021
YIL103W	DPH1	YGR066C	YGR066C	0.021
YIL103W	DPH1	YGR130C	YGR130C	0.021
YIL103W	DPH1	YHR050W	SMF2	0.021
YIL103W	DPH1	YIL095W	PRK1	0.021
YIL103W	DPH1	YJL147C	YJL147C	0.021
YIL103W	DPH1	YKL069W	YKL069W	0.021
YIL103W	DPH1	YKR043C	YKR043C	0.021
YIL103W	DPH1	YLR329W	REC102	0.021
YIL103W	DPH1	YLR333C	RPS25B	0.021
YIL103W	DPH1	YLR429W	CRN1	0.021
YIL103W	DPH1	YML004C	GLO1	0.021
YIL103W	DPH1	YOL063C	CRT10	0.021
YIL103W	DPH1	YOL119C	MCH4	0.021
YIL103W	DPH1	YOR138C	RUP1	0.021
YIL103W	DPH1	YOR191W	ULS1	0.021
YIL103W	DPH1	YOR246C	YOR246C	0.021
YIL103W	DPH1	YPL127C	HHO1	0.021
YIL103W	DPH1	YPL183W-A	RTC6	0.021
YIL103W	DPH1	YPL220W	RPL1A	0.021
YIL103W	DPH1	YPR032W	SRO7	0.021
YIL103W	DPH1	YAL068C	PAU8	0.02
YIL103W	DPH1	YBL057C	PTH2	0.02
YIL103W	DPH1	YBR264C	YPT10	0.02
YIL103W	DPH1	YCR028C-A	RIM1	0.02
YIL103W	DPH1	YFR017C	YFR017C	0.02
YIL103W	DPH1	YFR034C	PHO4	0.02
YIL103W	DPH1	YGL205W	POX1	0.02
YIL103W	DPH1	YGR027C	RPS25A	0.02
YIL103W	DPH1	YHR137W	ARO9	0.02
YIL103W	DPH1	YIL072W	HOP1	0.02
YIL103W	DPH1	YIL114C	POR2	0.02
YIL103W	DPH1	YIR039C	YPS6	0.02
YIL103W	DPH1	YKL034W	TUL1	0.02
YIL103W	DPH1	YKL092C	BUD2	0.02
YIL103W	DPH1	YLL048C	YBT1	0.02
YIL103W	DPH1	YLR113W	HOG1	0.02
YIL103W	DPH1	YLR124W	YLR124W	0.02
YIL103W	DPH1	YLR180W	SAM1	0.02
YIL103W	DPH1	YMR031C	YMR031C	0.02
YIL103W	DPH1	YMR145C	NDE1	0.02
YIL103W	DPH1	YMR195W	ICY1	0.02
YIL103W	DPH1	YMR285C	NGL2	0.02
YIL103W	DPH1	YOL018C	TLG2	0.02
YIL103W	DPH1	YOR173W	DCS2	0.02
YIL103W	DPH1	YOR283W	YOR283W	0.02
YIL103W	DPH1	YOR328W	PDR10	0.02
YIL103W	DPH1	YPR156C	TPO3	0.02
YIL103W	DPH1	YAR035W	YAT1	0.019
YIL103W	DPH1	YBR076W	ECM8	0.019
YIL103W	DPH1	YBR278W	DPB3	0.019
YIL103W	DPH1	YDL086W	YDL086W	0.019
YIL103W	DPH1	YDL213C	NOP6	0.019
YIL103W	DPH1	YDL243C	AAD4	0.019
YIL103W	DPH1	YDR032C	PST2	0.019
YIL103W	DPH1	YDR130C	FIN1	0.019
YIL103W	DPH1	YDR254W	CHL4	0.019
YIL103W	DPH1	YDR310C	SUM1	0.019
YIL103W	DPH1	YER163C	YER163C	0.019
YIL103W	DPH1	YER178W	PDA1	0.019
YIL103W	DPH1	YGL063W	PUS2	0.019
YIL103W	DPH1	YGL177W	YGL177W	0.019
YIL103W	DPH1	YGR014W	MSB2	0.019
YIL103W	DPH1	YGR071C	YGR071C	0.019
YIL103W	DPH1	YGR110W	YGR110W	0.019
YIL103W	DPH1	YGR197C	SNG1	0.019
YIL103W	DPH1	YHL022C	SPO11	0.019
YIL103W	DPH1	YHR199C	AIM46	0.019
YIL103W	DPH1	YJL138C	TIF2	0.019
YIL103W	DPH1	YJR099W	YUH1	0.019
YIL103W	DPH1	YJR100C	AIM25	0.019
YIL103W	DPH1	YJR116W	YJR116W	0.019
YIL103W	DPH1	YKL178C	STE3	0.019
YIL103W	DPH1	YKR094C	RPL40B	0.019
YIL103W	DPH1	YLL029W	FRA1	0.019
YIL103W	DPH1	YLR119W	SRN2	0.019
YIL103W	DPH1	YLR137W	YLR137W	0.019
YIL103W	DPH1	YLR278C	YLR278C	0.019
YIL103W	DPH1	YLR294C	YLR294C	0.019
YIL103W	DPH1	YLR448W	RPL6B	0.019
YIL103W	DPH1	YMR135C	GID8	0.019
YIL103W	DPH1	YMR259C	YMR259C	0.019
YIL103W	DPH1	YNL041C	COG6	0.019
YIL103W	DPH1	YOL043C	NTG2	0.019
YIL103W	DPH1	YOL075C	YOL075C	0.019
YIL103W	DPH1	YOR032C	HMS1	0.019
YIL103W	DPH1	YOR184W	SER1	0.019
YIL103W	DPH1	YOR220W	RCN2	0.019
YIL103W	DPH1	YOR239W	ABP140	0.019
YIL103W	DPH1	YOR354C	MSC6	0.019
YIL103W	DPH1	YPL159C	PET20	0.019
YIL103W	DPH1	YPL232W	SSO1	0.019
YIL103W	DPH1	YPL263C	KEL3	0.019
YIL103W	DPH1	YPR031W	NTO1	0.019
YIL103W	DPH1	YPR198W	SGE1	0.019
YIL103W	DPH1	YAL058W	CNE1	0.018
YIL103W	DPH1	YAL065C	YAL065C	0.018
YIL103W	DPH1	YBR007C	DSF2	0.018
YIL103W	DPH1	YBR186W	PCH2	0.018
YIL103W	DPH1	YBR295W	PCA1	0.018
YIL103W	DPH1	YCR017C	CWH43	0.018
YIL103W	DPH1	YCR033W	SNT1	0.018
YIL103W	DPH1	YCR085W	YCR085W	0.018
YIL103W	DPH1	YCR087W	YCR087W	0.018
YIL103W	DPH1	YDR075W	PPH3	0.018
YIL103W	DPH1	YDR220C	YDR220C	0.018
YIL103W	DPH1	YDR393W	SHE9	0.018
YIL103W	DPH1	YDR463W	STP1	0.018
YIL103W	DPH1	YDR512C	EMI1	0.018
YIL103W	DPH1	YFL020C	PAU5	0.018
YIL103W	DPH1	YGL013C	PDR1	0.018
YIL103W	DPH1	YGL138C	YGL138C	0.018
YIL103W	DPH1	YGR235C	YGR235C	0.018
YIL103W	DPH1	YGR238C	KEL2	0.018
YIL103W	DPH1	YHL044W	YHL044W	0.018
YIL103W	DPH1	YJL027C	YJL027C	0.018
YIL103W	DPH1	YKL109W	HAP4	0.018
YIL103W	DPH1	YKL113C	RAD27	0.018
YIL103W	DPH1	YKL214C	YRA2	0.018
YIL103W	DPH1	YKR051W	YKR051W	0.018
YIL103W	DPH1	YLL025W	PAU17	0.018
YIL103W	DPH1	YLR185W	RPL37A	0.018
YIL103W	DPH1	YLR257W	YLR257W	0.018
YIL103W	DPH1	YML029W	USA1	0.018
YIL103W	DPH1	YML097C	VPS9	0.018
YIL103W	DPH1	YML109W	ZDS2	0.018
YIL103W	DPH1	YMR068W	AVO2	0.018
YIL103W	DPH1	YMR178W	YMR178W	0.018
YIL103W	DPH1	YMR246W	FAA4	0.018
YIL103W	DPH1	YNL057W	YNL057W	0.018
YIL103W	DPH1	YNR058W	BIO3	0.018
YIL103W	DPH1	YNR063W	YNR063W	0.018
YIL103W	DPH1	YPL061W	ALD6	0.018
YIL103W	DPH1	YAL046C	AIM1	0.017
YIL103W	DPH1	YAR002C-A	ERP1	0.017
YIL103W	DPH1	YBR048W	RPS11B	0.017
YIL103W	DPH1	YCR034W	FEN1	0.017
YIL103W	DPH1	YCR043C	YCR043C	0.017
YIL103W	DPH1	YDR458C	HEH2	0.017
YIL103W	DPH1	YDR532C	YDR532C	0.017
YIL103W	DPH1	YER047C	SAP1	0.017
YIL103W	DPH1	YER049W	TPA1	0.017
YIL103W	DPH1	YER066W	YER066W	0.017
YIL103W	DPH1	YER121W	YER121W	0.017
YIL103W	DPH1	YFL031W	HAC1	0.017
YIL103W	DPH1	YGL179C	TOS3	0.017
YIL103W	DPH1	YGR276C	RNH70	0.017
YIL103W	DPH1	YHL023C	RMD11	0.017
YIL103W	DPH1	YJL043W	YJL043W	0.017
YIL103W	DPH1	YJL197W	UBP12	0.017
YIL103W	DPH1	YJR021C	REC107	0.017
YIL103W	DPH1	YJR126C	VPS70	0.017
YIL103W	DPH1	YKL114C	APN1	0.017
YIL103W	DPH1	YLL059C	YLL059C	0.017
YIL103W	DPH1	YLR013W	GAT3	0.017
YIL103W	DPH1	YLR311C	YLR311C	0.017
YIL103W	DPH1	YML038C	YMD8	0.017
YIL103W	DPH1	YML131W	YML131W	0.017
YIL103W	DPH1	YMR085W	YMR085W	0.017
YIL103W	DPH1	YMR120C	ADE17	0.017
YIL103W	DPH1	YMR304C-A	YMR304C-A	0.017
YIL103W	DPH1	YNL027W	CRZ1	0.017
YIL103W	DPH1	YNL077W	APJ1	0.017
YIL103W	DPH1	YNL104C	LEU4	0.017
YIL103W	DPH1	YNR014W	YNR014W	0.017
YIL103W	DPH1	YOR039W	CKB2	0.017
YIL103W	DPH1	YOR109W	INP53	0.017
YIL103W	DPH1	YOR125C	CAT5	0.017
YIL103W	DPH1	YPL035C	YPL035C	0.017
YIL103W	DPH1	YPL054W	LEE1	0.017
YIL103W	DPH1	YPL092W	SSU1	0.017
YIL103W	DPH1	YPL105C	SYH1	0.017
YIL103W	DPH1	YPR030W	CSR2	0.017
YIL103W	DPH1	YPR170C	YPR170C	0.017
YIL103W	DPH1	YBL085W	BOI1	0.016
YIL103W	DPH1	YBR203W	COS111	0.016
YIL103W	DPH1	YDL050C	YDL050C	0.016
YIL103W	DPH1	YDR179W-A	YDR179W-A	0.016
YIL103W	DPH1	YDR533C	HSP31	0.016
YIL103W	DPH1	YER089C	PTC2	0.016
YIL103W	DPH1	YER150W	SPI1	0.016
YIL103W	DPH1	YER185W	PUG1	0.016
YIL103W	DPH1	YGL020C	GET1	0.016
YIL103W	DPH1	YGL077C	HNM1	0.016
YIL103W	DPH1	YGR105W	VMA21	0.016
YIL103W	DPH1	YGR164W	YGR164W	0.016
YIL103W	DPH1	YGR192C	TDH3	0.016
YIL103W	DPH1	YGR200C	ELP2	0.016
YIL103W	DPH1	YGR208W	SER2	0.016
YIL103W	DPH1	YGR213C	RTA1	0.016
YIL103W	DPH1	YHL017W	YHL017W	0.016
YIL103W	DPH1	YHR140W	YHR140W	0.016
YIL103W	DPH1	YIL002C	INP51	0.016
YIL103W	DPH1	YJL188C	BUD19	0.016
YIL103W	DPH1	YKL008C	LAC1	0.016
YIL103W	DPH1	YKL015W	PUT3	0.016
YIL103W	DPH1	YKL031W	YKL031W	0.016
YIL103W	DPH1	YKR019C	IRS4	0.016
YIL103W	DPH1	YLL014W	EMC6	0.016
YIL103W	DPH1	YLL056C	YLL056C	0.016
YIL103W	DPH1	YLR098C	CHA4	0.016
YIL103W	DPH1	YLR300W	EXG1	0.016
YIL103W	DPH1	YLR380W	CSR1	0.016
YIL103W	DPH1	YML021C	UNG1	0.016
YIL103W	DPH1	YMR020W	FMS1	0.016
YIL103W	DPH1	YMR102C	YMR102C	0.016
YIL103W	DPH1	YMR155W	YMR155W	0.016
YIL103W	DPH1	YNL044W	YIP3	0.016
YIL103W	DPH1	YNL049C	SFB2	0.016
YIL103W	DPH1	YNL051W	COG5	0.016
YIL103W	DPH1	YNL159C	ASI2	0.016
YIL103W	DPH1	YNR012W	URK1	0.016
YIL103W	DPH1	YOL068C	HST1	0.016
YIL103W	DPH1	YOL104C	NDJ1	0.016
YIL103W	DPH1	YOL105C	WSC3	0.016
YIL103W	DPH1	YOR185C	GSP2	0.016
YIL103W	DPH1	YOR263C	YOR263C	0.016
YIL103W	DPH1	YPL108W	YPL108W	0.016
YIL103W	DPH1	YPL112C	PEX25	0.016
YIL103W	DPH1	YPL257W	YPL257W	0.016
YIL103W	DPH1	YPR020W	ATP20	0.016
YIL103W	DPH1	YPR134W	MSS18	0.016
YIL103W	DPH1	YBR273C	UBX7	0.015
YIL103W	DPH1	YDL137W	ARF2	0.015
YIL103W	DPH1	YDL190C	UFD2	0.015
YIL103W	DPH1	YDL214C	PRR2	0.015
YIL103W	DPH1	YDR207C	UME6	0.015
YIL103W	DPH1	YDR309C	GIC2	0.015
YIL103W	DPH1	YDR329C	PEX3	0.015
YIL103W	DPH1	YDR333C	YDR333C	0.015
YIL103W	DPH1	YDR428C	BNA7	0.015
YIL103W	DPH1	YDR453C	TSA2	0.015
YIL103W	DPH1	YDR486C	VPS60	0.015
YIL103W	DPH1	YER181C	YER181C	0.015
YIL103W	DPH1	YHL039W	YHL039W	0.015
YIL103W	DPH1	YJL016W	YJL016W	0.015
YIL103W	DPH1	YJL079C	PRY1	0.015
YIL103W	DPH1	YJR088C	EMC2	0.015
YIL103W	DPH1	YKL017C	HCS1	0.015
YIL103W	DPH1	YKR048C	NAP1	0.015
YIL103W	DPH1	YKR104W	YKR104W	0.015
YIL103W	DPH1	YLR020C	YEH2	0.015
YIL103W	DPH1	YLR050C	YLR050C	0.015
YIL103W	DPH1	YLR170C	APS1	0.015
YIL103W	DPH1	YLR173W	YLR173W	0.015
YIL103W	DPH1	YLR206W	ENT2	0.015
YIL103W	DPH1	YLR309C	IMH1	0.015
YIL103W	DPH1	YLR361C	DCR2	0.015
YIL103W	DPH1	YLR405W	DUS4	0.015
YIL103W	DPH1	YML059C	NTE1	0.015
YIL103W	DPH1	YMR099C	YMR099C	0.015
YIL103W	DPH1	YMR176W	ECM5	0.015
YIL103W	DPH1	YMR304W	UBP15	0.015
YIL103W	DPH1	YNR033W	ABZ1	0.015
YIL103W	DPH1	YOR078W	BUD21	0.015
YIL103W	DPH1	YOR092W	ECM3	0.015
YIL103W	DPH1	YOR134W	BAG7	0.015
YIL103W	DPH1	YOR365C	YOR365C	0.015
YIL103W	DPH1	YPL009C	YPL009C	0.015
YIL103W	DPH1	YPL191C	YPL191C	0.015
YIL103W	DPH1	YPR058W	YMC1	0.015
YIL103W	DPH1	YPR071W	YPR071W	0.015
YIL103W	DPH1	YPR097W	YPR097W	0.015
YIL103W	DPH1	YPR141C	KAR3	0.015
YIL103W	DPH1	YPR152C	URN1	0.015
YIL103W	DPH1	YBR105C	VID24	0.014
YIL103W	DPH1	YBR141C	YBR141C	0.014
YIL103W	DPH1	YBR283C	SSH1	0.014
YIL103W	DPH1	YDL001W	RMD1	0.014
YIL103W	DPH1	YDL012C	YDL012C	0.014
YIL103W	DPH1	YDL155W	CLB3	0.014
YIL103W	DPH1	YDL169C	UGX2	0.014
YIL103W	DPH1	YDL182W	LYS20	0.014
YIL103W	DPH1	YDL184C	RPL41A	0.014
YIL103W	DPH1	YDL192W	ARF1	0.014
YIL103W	DPH1	YDR123C	INO2	0.014
YIL103W	DPH1	YDR127W	ARO1	0.014
YIL103W	DPH1	YDR338C	YDR338C	0.014
YIL103W	DPH1	YDR493W	AIM8	0.014
YIL103W	DPH1	YER072W	VTC1	0.014
YIL103W	DPH1	YER093C-A	AIM11	0.014
YIL103W	DPH1	YER113C	TMN3	0.014
YIL103W	DPH1	YER152C	YER152C	0.014
YIL103W	DPH1	YFL027C	GYP8	0.014
YIL103W	DPH1	YFR039C	YFR039C	0.014
YIL103W	DPH1	YFR048W	RMD8	0.014
YIL103W	DPH1	YGL161C	YIP5	0.014
YIL103W	DPH1	YGL226W	MTC3	0.014
YIL103W	DPH1	YGR144W	THI4	0.014
YIL103W	DPH1	YGR206W	MVB12	0.014
YIL103W	DPH1	YHR130C	YHR130C	0.014
YIL103W	DPH1	YJL060W	BNA3	0.014
YIL103W	DPH1	YJR128W	YJR128W	0.014
YIL103W	DPH1	YKL063C	YKL063C	0.014
YIL103W	DPH1	YKL067W	YNK1	0.014
YIL103W	DPH1	YKL176C	LST4	0.014
YIL103W	DPH1	YKR056W	TRM2	0.014
YIL103W	DPH1	YLL057C	JLP1	0.014
YIL103W	DPH1	YLR193C	UPS1	0.014
YIL103W	DPH1	YLR266C	PDR8	0.014
YIL103W	DPH1	YLR271W	YLR271W	0.014
YIL103W	DPH1	YLR297W	YLR297W	0.014
YIL103W	DPH1	YNL052W	COX5A	0.014
YIL103W	DPH1	YOL025W	LAG2	0.014
YIL103W	DPH1	YOR183W	FYV12	0.014
YIL103W	DPH1	YOR245C	DGA1	0.014
YIL103W	DPH1	YPL067C	YPL067C	0.014
YIL103W	DPH1	YPL163C	SVS1	0.014
YIL103W	DPH1	YPR003C	YPR003C	0.014
YIL103W	DPH1	YAR015W	ADE1	0.013
YIL103W	DPH1	YBL047C	EDE1	0.013
YIL103W	DPH1	YBL082C	ALG3	0.013
YIL103W	DPH1	YCR044C	PER1	0.013
YIL103W	DPH1	YCR099C	YCR099C	0.013
YIL103W	DPH1	YDL122W	UBP1	0.013
YIL103W	DPH1	YDR090C	YDR090C	0.013
YIL103W	DPH1	YDR131C	YDR131C	0.013
YIL103W	DPH1	YDR158W	HOM2	0.013
YIL103W	DPH1	YDR476C	YDR476C	0.013
YIL103W	DPH1	YDR513W	GRX2	0.013
YIL103W	DPH1	YFL006W	YFL006W	0.013
YIL103W	DPH1	YFL010C	WWM1	0.013
YIL103W	DPH1	YGL085W	YGL085W	0.013
YIL103W	DPH1	YGR139W	YGR139W	0.013
YIL103W	DPH1	YHL012W	YHL012W	0.013
YIL103W	DPH1	YHR028C	DAP2	0.013
YIL103W	DPH1	YHR123W	EPT1	0.013
YIL103W	DPH1	YIL009C-A	EST3	0.013
YIL103W	DPH1	YIL164C	NIT1	0.013
YIL103W	DPH1	YJL082W	IML2	0.013
YIL103W	DPH1	YJR001W	AVT1	0.013
YIL103W	DPH1	YJR075W	HOC1	0.013
YIL103W	DPH1	YJR152W	DAL5	0.013
YIL103W	DPH1	YLR030W	YLR030W	0.013
YIL103W	DPH1	YLR373C	VID22	0.013
YIL103W	DPH1	YLR443W	ECM7	0.013
YIL103W	DPH1	YML048W-A	YML048W-A	0.013
YIL103W	DPH1	YML071C	COG8	0.013
YIL103W	DPH1	YMR086W	YMR086W	0.013
YIL103W	DPH1	YNL029C	KTR5	0.013
YIL103W	DPH1	YNL067W	RPL9B	0.013
YIL103W	DPH1	YNR074C	AIF1	0.013
YIL103W	DPH1	YOL020W	TAT2	0.013
YIL103W	DPH1	YOR242C	SSP2	0.013
YIL103W	DPH1	YOR300W	YOR300W	0.013
YIL103W	DPH1	YPL001W	HAT1	0.013
YIL103W	DPH1	YPR027C	YPR027C	0.013
YIL103W	DPH1	YBR015C	MNN2	0.012
YIL103W	DPH1	YBR290W	BSD2	0.012
YIL103W	DPH1	YBR301W	DAN3	0.012
YIL103W	DPH1	YDR098C	GRX3	0.012
YIL103W	DPH1	YDR151C	CTH1	0.012
YIL103W	DPH1	YDR216W	ADR1	0.012
YIL103W	DPH1	YDR372C	VPS74	0.012
YIL103W	DPH1	YDR501W	PLM2	0.012
YIL103W	DPH1	YDR506C	YDR506C	0.012
YIL103W	DPH1	YGL054C	ERV14	0.012
YIL103W	DPH1	YGR136W	LSB1	0.012
YIL103W	DPH1	YIL065C	FIS1	0.012
YIL103W	DPH1	YIL086C	YIL086C	0.012
YIL103W	DPH1	YJL148W	RPA34	0.012
YIL103W	DPH1	YJL153C	INO1	0.012
YIL103W	DPH1	YJL185C	YJL185C	0.012
YIL103W	DPH1	YJR051W	OSM1	0.012
YIL103W	DPH1	YKL091C	YKL091C	0.012
YIL103W	DPH1	YKL131W	YKL131W	0.012
YIL103W	DPH1	YKR029C	SET3	0.012
YIL103W	DPH1	YLR431C	ATG23	0.012
YIL103W	DPH1	YML072C	TCB3	0.012
YIL103W	DPH1	YML103C	NUP188	0.012
YIL103W	DPH1	YMR163C	INP2	0.012
YIL103W	DPH1	YMR253C	YMR253C	0.012
YIL103W	DPH1	YMR312W	ELP6	0.012
YIL103W	DPH1	YNL108C	YNL108C	0.012
YIL103W	DPH1	YNR008W	LRO1	0.012
YIL103W	DPH1	YOL029C	YOL029C	0.012
YIL103W	DPH1	YOL147C	PEX11	0.012
YIL103W	DPH1	YOL162W	YOL162W	0.012
YIL103W	DPH1	YOR068C	VAM10	0.012
YIL103W	DPH1	YOR115C	TRS33	0.012
YIL103W	DPH1	YOR222W	ODC2	0.012
YIL103W	DPH1	YOR247W	SRL1	0.012
YIL103W	DPH1	YOR252W	TMA16	0.012
YIL103W	DPH1	YPL115C	BEM3	0.012
YIL103W	DPH1	YAR044W	YAR044W	0.011
YIL103W	DPH1	YBL017C	PEP1	0.011
YIL103W	DPH1	YBL065W	YBL065W	0.011
YIL103W	DPH1	YBL067C	UBP13	0.011
YIL103W	DPH1	YBR040W	FIG1	0.011
YIL103W	DPH1	YBR085W	AAC3	0.011
YIL103W	DPH1	YBR090C-A	YBR090C-A	0.011
YIL103W	DPH1	YBR132C	AGP2	0.011
YIL103W	DPH1	YCR020C-A	MAK31	0.011
YIL103W	DPH1	YDL020C	RPN4	0.011
YIL103W	DPH1	YDL109C	YDL109C	0.011
YIL103W	DPH1	YDR162C	NBP2	0.011
YIL103W	DPH1	YDR286C	YDR286C	0.011
YIL103W	DPH1	YFR022W	ROG3	0.011
YIL103W	DPH1	YGL253W	HXK2	0.011
YIL103W	DPH1	YGR084C	MRP13	0.011
YIL103W	DPH1	YHL006C	SHU1	0.011
YIL103W	DPH1	YHR159W	YHR159W	0.011
YIL103W	DPH1	YIL028W	YIL028W	0.011
YIL103W	DPH1	YJL172W	CPS1	0.011
YIL103W	DPH1	YKL151C	YKL151C	0.011
YIL103W	DPH1	YKR005C	YKR005C	0.011
YIL103W	DPH1	YLR209C	PNP1	0.011
YIL103W	DPH1	YLR262C-A	TMA7	0.011
YIL103W	DPH1	YLR285W	NNT1	0.011
YIL103W	DPH1	YLR412W	BER1	0.011
YIL103W	DPH1	YML117W-A	YML117W-A	0.011
YIL103W	DPH1	YMR106C	YKU80	0.011
YIL103W	DPH1	YNL022C	YNL022C	0.011
YIL103W	DPH1	YNR064C	YNR064C	0.011
YIL103W	DPH1	YOL002C	IZH2	0.011
YIL103W	DPH1	YOL113W	SKM1	0.011
YIL103W	DPH1	YOL136C	PFK27	0.011
YIL103W	DPH1	YOR067C	ALG8	0.011
YIL103W	DPH1	YOR229W	WTM2	0.011
YIL103W	DPH1	YPL140C	MKK2	0.011
YIL103W	DPH1	YPR021C	AGC1	0.011
YIL103W	DPH1	YAR031W	PRM9	0.01
YIL103W	DPH1	YBL103C	RTG3	0.01
YIL103W	DPH1	YBR005W	RCR1	0.01
YIL103W	DPH1	YCR076C	YCR076C	0.01
YIL103W	DPH1	YDL231C	BRE4	0.01
YIL103W	DPH1	YER073W	ALD5	0.01
YIL103W	DPH1	YER129W	SAK1	0.01
YIL103W	DPH1	YFR009W	GCN20	0.01
YIL103W	DPH1	YGL062W	PYC1	0.01
YIL103W	DPH1	YGL082W	YGL082W	0.01
YIL103W	DPH1	YGL083W	SCY1	0.01
YIL103W	DPH1	YGL121C	GPG1	0.01
YIL103W	DPH1	YGL146C	YGL146C	0.01
YIL103W	DPH1	YGL237C	HAP2	0.01
YIL103W	DPH1	YHR015W	MIP6	0.01
YIL103W	DPH1	YIL005W	EPS1	0.01
YIL103W	DPH1	YIL011W	TIR3	0.01
YIL103W	DPH1	YJL110C	GZF3	0.01
YIL103W	DPH1	YJR033C	RAV1	0.01
YIL103W	DPH1	YKL071W	YKL071W	0.01
YIL103W	DPH1	YKR058W	GLG1	0.01
YIL103W	DPH1	YLL019C	KNS1	0.01
YIL103W	DPH1	YLR044C	PDC1	0.01
YIL103W	DPH1	YLR120C	YPS1	0.01
YIL103W	DPH1	YMR027W	YMR027W	0.01
YIL103W	DPH1	YMR110C	HFD1	0.01
YIL103W	DPH1	YMR313C	TGL3	0.01
YIL103W	DPH1	YNL078W	NIS1	0.01
YIL103W	DPH1	YOL013W-A	YOL013W-A	0.01
YIL103W	DPH1	YOL116W	MSN1	0.01
YIL103W	DPH1	YOR167C	RPS28A	0.01
YIL103W	DPH1	YPL034W	YPL034W	0.01
YIL103W	DPH1	YAL002W	VPS8	0.009
YIL103W	DPH1	YAL014C	SYN8	0.009
YIL103W	DPH1	YBL031W	SHE1	0.009
YIL103W	DPH1	YBL037W	APL3	0.009
YIL103W	DPH1	YBL066C	SEF1	0.009
YIL103W	DPH1	YBL075C	SSA3	0.009
YIL103W	DPH1	YBR244W	GPX2	0.009
YIL103W	DPH1	YCR021C	HSP30	0.009
YIL103W	DPH1	YDR101C	ARX1	0.009
YIL103W	DPH1	YDR202C	RAV2	0.009
YIL103W	DPH1	YDR257C	RKM4	0.009
YIL103W	DPH1	YDR494W	RSM28	0.009
YIL103W	DPH1	YDR515W	SLF1	0.009
YIL103W	DPH1	YER062C	HOR2	0.009
YIL103W	DPH1	YER109C	FLO8	0.009
YIL103W	DPH1	YER120W	SCS2	0.009
YIL103W	DPH1	YER173W	RAD24	0.009
YIL103W	DPH1	YFL014W	HSP12	0.009
YIL103W	DPH1	YGL234W	ADE5,7	0.009
YIL103W	DPH1	YGL252C	RTG2	0.009
YIL103W	DPH1	YGR143W	SKN1	0.009
YIL103W	DPH1	YJL051W	IRC8	0.009
YIL103W	DPH1	YJR044C	VPS55	0.009
YIL103W	DPH1	YJR120W	YJR120W	0.009
YIL103W	DPH1	YKL046C	DCW1	0.009
YIL103W	DPH1	YKL136W	YKL136W	0.009
YIL103W	DPH1	YKL146W	AVT3	0.009
YIL103W	DPH1	YKR080W	MTD1	0.009
YIL103W	DPH1	YLL054C	YLL054C	0.009
YIL103W	DPH1	YLR012C	YLR012C	0.009
YIL103W	DPH1	YLR386W	VAC14	0.009
YIL103W	DPH1	YNL127W	FAR11	0.009
YIL103W	DPH1	YNR040W	YNR040W	0.009
YIL103W	DPH1	YOL032W	OPI10	0.009
YIL103W	DPH1	YOR059C	YOR059C	0.009
YIL103W	DPH1	YOR065W	CYT1	0.009
YIL103W	DPH1	YOR298W	MUM3	0.009
YIL103W	DPH1	YPL008W	CHL1	0.009
YIL103W	DPH1	YPL212C	PUS1	0.009
YIL103W	DPH1	YPR120C	CLB5	0.009
YIL103W	DPH1	YPR164W	MMS1	0.009
YIL103W	DPH1	YAL061W	BDH2	0.008
YIL103W	DPH1	YBR013C	YBR013C	0.008
YIL103W	DPH1	YBR139W	YBR139W	0.008
YIL103W	DPH1	YCL056C	YCL056C	0.008
YIL103W	DPH1	YCR027C	RHB1	0.008
YIL103W	DPH1	YCR102W-A	YCR102W-A	0.008
YIL103W	DPH1	YDL104C	QRI7	0.008
YIL103W	DPH1	YDL130W	RPP1B	0.008
YIL103W	DPH1	YDR030C	RAD28	0.008
YIL103W	DPH1	YDR042C	YDR042C	0.008
YIL103W	DPH1	YDR191W	HST4	0.008
YIL103W	DPH1	YDR290W	YDR290W	0.008
YIL103W	DPH1	YDR291W	HRQ1	0.008
YIL103W	DPH1	YDR363W-A	SEM1	0.008
YIL103W	DPH1	YDR375C	BCS1	0.008
YIL103W	DPH1	YER164W	CHD1	0.008
YIL103W	DPH1	YFL032W	YFL032W	0.008
YIL103W	DPH1	YFR016C	YFR016C	0.008
YIL103W	DPH1	YGL009C	LEU1	0.008
YIL103W	DPH1	YGL181W	GTS1	0.008
YIL103W	DPH1	YGR146C	YGR146C	0.008
YIL103W	DPH1	YGR228W	YGR228W	0.008
YIL103W	DPH1	YHL042W	YHL042W	0.008
YIL103W	DPH1	YHR163W	SOL3	0.008
YIL103W	DPH1	YIR016W	YIR016W	0.008
YIL103W	DPH1	YJL123C	MTC1	0.008
YIL103W	DPH1	YJR040W	GEF1	0.008
YIL103W	DPH1	YLL032C	YLL032C	0.008
YIL103W	DPH1	YLR110C	CCW12	0.008
YIL103W	DPH1	YLR253W	YLR253W	0.008
YIL103W	DPH1	YLR299W	ECM38	0.008
YIL103W	DPH1	YML048W	GSF2	0.008
YIL103W	DPH1	YML106W	URA5	0.008
YIL103W	DPH1	YML108W	YML108W	0.008
YIL103W	DPH1	YMR129W	POM152	0.008
YIL103W	DPH1	YOL017W	ESC8	0.008
YIL103W	DPH1	YOL082W	ATG19	0.008
YIL103W	DPH1	YOR019W	YOR019W	0.008
YIL103W	DPH1	YOR041C	YOR041C	0.008
YIL103W	DPH1	YOR309C	YOR309C	0.008
YIL103W	DPH1	YPL051W	ARL3	0.008
YIL103W	DPH1	YPL069C	BTS1	0.008
YIL103W	DPH1	YPR091C	YPR091C	0.008
YIL103W	DPH1	YPR174C	YPR174C	0.008
YIL103W	DPH1	YPR199C	ARR1	0.008
YIL103W	DPH1	YBL063W	KIP1	0.007
YIL103W	DPH1	YBL100C	YBL100C	0.007
YIL103W	DPH1	YBR027C	YBR027C	0.007
YIL103W	DPH1	YBR068C	BAP2	0.007
YIL103W	DPH1	YBR267W	REI1	0.007
YIL103W	DPH1	YCL028W	RNQ1	0.007
YIL103W	DPH1	YDL018C	ERP3	0.007
YIL103W	DPH1	YDL082W	RPL13A	0.007
YIL103W	DPH1	YDL236W	PHO13	0.007
YIL103W	DPH1	YDR033W	MRH1	0.007
YIL103W	DPH1	YDR233C	RTN1	0.007
YIL103W	DPH1	YDR276C	PMP3	0.007
YIL103W	DPH1	YDR423C	CAD1	0.007
YIL103W	DPH1	YER101C	AST2	0.007
YIL103W	DPH1	YER137C	YER137C	0.007
YIL103W	DPH1	YFR013W	IOC3	0.007
YIL103W	DPH1	YGR044C	RME1	0.007
YIL103W	DPH1	YGR196C	FYV8	0.007
YIL103W	DPH1	YGR244C	LSC2	0.007
YIL103W	DPH1	YGR282C	BGL2	0.007
YIL103W	DPH1	YHR012W	VPS29	0.007
YIL103W	DPH1	YHR153C	SPO16	0.007
YIL103W	DPH1	YHR209W	CRG1	0.007
YIL103W	DPH1	YIL017C	VID28	0.007
YIL103W	DPH1	YIL165C	YIL165C	0.007
YIL103W	DPH1	YJL055W	YJL055W	0.007
YIL103W	DPH1	YML019W	OST6	0.007
YIL103W	DPH1	YMR054W	STV1	0.007
YIL103W	DPH1	YMR219W	ESC1	0.007
YIL103W	DPH1	YMR258C	YMR258C	0.007
YIL103W	DPH1	YNL092W	YNL092W	0.007
YIL103W	DPH1	YNL094W	APP1	0.007
YIL103W	DPH1	YOR196C	LIP5	0.007
YIL103W	DPH1	YPL046C	ELC1	0.007
YIL103W	DPH1	YPL102C	YPL102C	0.007
YIL103W	DPH1	YPL165C	SET6	0.007
YIL103W	DPH1	YPR043W	RPL43A	0.007
YIL103W	DPH1	YCR098C	GIT1	0.006
YIL103W	DPH1	YDL019C	OSH2	0.006
YIL103W	DPH1	YDL023C	YDL023C	0.006
YIL103W	DPH1	YDL071C	YDL071C	0.006
YIL103W	DPH1	YDR015C	YDR015C	0.006
YIL103W	DPH1	YDR035W	ARO3	0.006
YIL103W	DPH1	YDR369C	XRS2	0.006
YIL103W	DPH1	YGL045W	RIM8	0.006
YIL103W	DPH1	YGL164C	YRB30	0.006
YIL103W	DPH1	YGR019W	UGA1	0.006
YIL103W	DPH1	YGR212W	SLI1	0.006
YIL103W	DPH1	YIL035C	CKA1	0.006
YIL103W	DPH1	YIL163C	YIL163C	0.006
YIL103W	DPH1	YLR042C	YLR042C	0.006
YIL103W	DPH1	YLR077W	FMP25	0.006
YIL103W	DPH1	YML070W	DAK1	0.006
YIL103W	DPH1	YML123C	PHO84	0.006
YIL103W	DPH1	YMR130W	YMR130W	0.006
YIL103W	DPH1	YMR226C	TMA29	0.006
YIL103W	DPH1	YMR251W	GTO3	0.006
YIL103W	DPH1	YMR318C	ADH6	0.006
YIL103W	DPH1	YNL008C	ASI3	0.006
YIL103W	DPH1	YOL048C	YOL048C	0.006
YIL103W	DPH1	YOR005C	DNL4	0.006
YIL103W	DPH1	YOR377W	ATF1	0.006
YIL103W	DPH1	YPR009W	SUT2	0.006
YIL103W	DPH1	YPR171W	BSP1	0.006
YIL103W	DPH1	YAL019W	FUN30	0.005
YIL103W	DPH1	YBR046C	ZTA1	0.005
YIL103W	DPH1	YBR114W	RAD16	0.005
YIL103W	DPH1	YCL063W	VAC17	0.005
YIL103W	DPH1	YDL037C	BSC1	0.005
YIL103W	DPH1	YDL085W	NDE2	0.005
YIL103W	DPH1	YDR024W	FYV1	0.005
YIL103W	DPH1	YDR058C	TGL2	0.005
YIL103W	DPH1	YDR171W	HSP42	0.005
YIL103W	DPH1	YDR399W	HPT1	0.005
YIL103W	DPH1	YDR502C	SAM2	0.005
YIL103W	DPH1	YDR504C	SPG3	0.005
YIL103W	DPH1	YFL007W	BLM10	0.005
YIL103W	DPH1	YGL028C	SCW11	0.005
YIL103W	DPH1	YGL034C	YGL034C	0.005
YIL103W	DPH1	YGL159W	YGL159W	0.005
YIL103W	DPH1	YGL208W	SIP2	0.005
YIL103W	DPH1	YGL251C	HFM1	0.005
YIL103W	DPH1	YGL256W	ADH4	0.005
YIL103W	DPH1	YGR101W	PCP1	0.005
YIL103W	DPH1	YGR122C-A	YGR122C-A	0.005
YIL103W	DPH1	YHR008C	SOD2	0.005
YIL103W	DPH1	YHR116W	COX23	0.005
YIL103W	DPH1	YIL007C	NAS2	0.005
YIL103W	DPH1	YJL059W	YHC3	0.005
YIL103W	DPH1	YJL126W	NIT2	0.005
YIL103W	DPH1	YJL139C	YUR1	0.005
YIL103W	DPH1	YJL152W	YJL152W	0.005
YIL103W	DPH1	YJR077C	MIR1	0.005
YIL103W	DPH1	YKR045C	YKR045C	0.005
YIL103W	DPH1	YLR232W	YLR232W	0.005
YIL103W	DPH1	YMR011W	HXT2	0.005
YIL103W	DPH1	YMR223W	UBP8	0.005
YIL103W	DPH1	YMR250W	GAD1	0.005
YIL103W	DPH1	YMR316W	DIA1	0.005
YIL103W	DPH1	YOR080W	DIA2	0.005
YIL103W	DPH1	YOR228C	YOR228C	0.005
YIL103W	DPH1	YOR274W	MOD5	0.005
YIL103W	DPH1	YOR338W	YOR338W	0.005
YIL103W	DPH1	YOR339C	UBC11	0.005
YIL103W	DPH1	YPL026C	SKS1	0.005
YIL103W	DPH1	YPL030W	TRM44	0.005
YIL103W	DPH1	YPL070W	MUK1	0.005
YIL103W	DPH1	YPL072W	UBP16	0.005
YIL103W	DPH1	YBL007C	SLA1	0.004
YIL103W	DPH1	YBR226C	YBR226C	0.004
YIL103W	DPH1	YCR005C	CIT2	0.004
YIL103W	DPH1	YDR089W	YDR089W	0.004
YIL103W	DPH1	YDR154C	YDR154C	0.004
YIL103W	DPH1	YDR441C	APT2	0.004
YIL103W	DPH1	YDR522C	SPS2	0.004
YIL103W	DPH1	YER132C	PMD1	0.004
YIL103W	DPH1	YFL030W	AGX1	0.004
YIL103W	DPH1	YFL036W	RPO41	0.004
YIL103W	DPH1	YFL044C	OTU1	0.004
YIL103W	DPH1	YFR030W	MET10	0.004
YIL103W	DPH1	YGL196W	DSD1	0.004
YIL103W	DPH1	YGL232W	TAN1	0.004
YIL103W	DPH1	YGR037C	ACB1	0.004
YIL103W	DPH1	YGR039W	YGR039W	0.004
YIL103W	DPH1	YGR041W	BUD9	0.004
YIL103W	DPH1	YGR100W	MDR1	0.004
YIL103W	DPH1	YGR217W	CCH1	0.004
YIL103W	DPH1	YJL133W	MRS3	0.004
YIL103W	DPH1	YJR153W	PGU1	0.004
YIL103W	DPH1	YKL068W	NUP100	0.004
YIL103W	DPH1	YKL116C	PRR1	0.004
YIL103W	DPH1	YKL120W	OAC1	0.004
YIL103W	DPH1	YKR055W	RHO4	0.004
YIL103W	DPH1	YLR108C	YLR108C	0.004
YIL103W	DPH1	YLR313C	SPH1	0.004
YIL103W	DPH1	YLR326W	YLR326W	0.004
YIL103W	DPH1	YMR105C	PGM2	0.004
YIL103W	DPH1	YMR210W	YMR210W	0.004
YIL103W	DPH1	YOL008W	COQ10	0.004
YIL103W	DPH1	YOL057W	YOL057W	0.004
YIL103W	DPH1	YOL118C	YOL118C	0.004
YIL103W	DPH1	YOR021C	YOR021C	0.004
YIL103W	DPH1	YOR054C	VHS3	0.004
YIL103W	DPH1	YPL176C	TRE1	0.004
YIL103W	DPH1	YPR037C	ERV2	0.004
YIL103W	DPH1	YPR050C	YPR050C	0.004
YIL103W	DPH1	YBL068W	PRS4	0.003
YIL103W	DPH1	YBR019C	GAL10	0.003
YIL103W	DPH1	YBR044C	TCM62	0.003
YIL103W	DPH1	YBR063C	YBR063C	0.003
YIL103W	DPH1	YBR162C	TOS1	0.003
YIL103W	DPH1	YBR298C	MAL31	0.003
YIL103W	DPH1	YDL117W	CYK3	0.003
YIL103W	DPH1	YDR083W	RRP8	0.003
YIL103W	DPH1	YDR152W	GIR2	0.003
YIL103W	DPH1	YDR421W	ARO80	0.003
YIL103W	DPH1	YFR032C	YFR032C	0.003
YIL103W	DPH1	YFR047C	BNA6	0.003
YIL103W	DPH1	YGR004W	PEX31	0.003
YIL103W	DPH1	YGR043C	NQM1	0.003
YIL103W	DPH1	YIL092W	YIL092W	0.003
YIL103W	DPH1	YIL151C	ESL1	0.003
YIL103W	DPH1	YLL026W	HSP104	0.003
YIL103W	DPH1	YLL045C	RPL8B	0.003
YIL103W	DPH1	YLR059C	REX2	0.003
YIL103W	DPH1	YLR142W	PUT1	0.003
YIL103W	DPH1	YLR290C	YLR290C	0.003
YIL103W	DPH1	YMR119W-A	YMR119W-A	0.003
YIL103W	DPH1	YMR161W	HLJ1	0.003
YIL103W	DPH1	YMR166C	YMR166C	0.003
YIL103W	DPH1	YMR202W	ERG2	0.003
YIL103W	DPH1	YNL142W	MEP2	0.003
YIL103W	DPH1	YNL155W	YNL155W	0.003
YIL103W	DPH1	YNR044W	AGA1	0.003
YIL103W	DPH1	YOL108C	INO4	0.003
YIL103W	DPH1	YOR111W	YOR111W	0.003
YIL103W	DPH1	YOR128C	ADE2	0.003
YIL103W	DPH1	YOR265W	RBL2	0.003
YIL103W	DPH1	YOR275C	RIM20	0.003
YIL103W	DPH1	YOR313C	SPS4	0.003
YIL103W	DPH1	YPL256C	CLN2	0.003
YIL103W	DPH1	YPR148C	YPR148C	0.003
YIL103W	DPH1	YAL018C	YAL018C	0.002
YIL103W	DPH1	YBR228W	SLX1	0.002
YIL103W	DPH1	YDL061C	RPS29B	0.002
YIL103W	DPH1	YDR003W	RCR2	0.002
YIL103W	DPH1	YDR444W	YDR444W	0.002
YIL103W	DPH1	YGL021W	ALK1	0.002
YIL103W	DPH1	YGR225W	AMA1	0.002
YIL103W	DPH1	YHL032C	GUT1	0.002
YIL103W	DPH1	YHR103W	SBE22	0.002
YIL103W	DPH1	YIL023C	YKE4	0.002
YIL103W	DPH1	YIL059C	YIL059C	0.002
YIL103W	DPH1	YIL139C	REV7	0.002
YIL103W	DPH1	YJL093C	TOK1	0.002
YIL103W	DPH1	YJL163C	YJL163C	0.002
YIL103W	DPH1	YJR125C	ENT3	0.002
YIL103W	DPH1	YKL051W	SFK1	0.002
YIL103W	DPH1	YKL065C	YET1	0.002
YIL103W	DPH1	YKR042W	UTH1	0.002
YIL103W	DPH1	YKR067W	GPT2	0.002
YIL103W	DPH1	YKR082W	NUP133	0.002
YIL103W	DPH1	YLL013C	PUF3	0.002
YIL103W	DPH1	YLR273C	PIG1	0.002
YIL103W	DPH1	YLR375W	STP3	0.002
YIL103W	DPH1	YLR390W-A	CCW14	0.002
YIL103W	DPH1	YLR416C	YLR416C	0.002
YIL103W	DPH1	YML008C	ERG6	0.002
[truncated: 1,885 more rows]

## Sheet: DPH2
ORF1	Gene1	ORF2	Gene2	Correlation
YKL191W	DPH2	YJR097W	DPH4/JJJ3	0.316
YKL191W	DPH2	YIL103W	DPH1	0.303
YKL191W	DPH2	YBR246W	YBR246W	0.278
YKL191W	DPH2	YLR172C	DPH5	0.234
YKL191W	DPH2	YLR143W	YLR143W	0.188
YKL191W	DPH2	YGR178C	PBP1	0.164
YKL191W	DPH2	YER118C	SHO1	0.156
YKL191W	DPH2	YOR133W	EFT1	0.152
YKL191W	DPH2	YHR146W	CRP1	0.148
YKL191W	DPH2	YPL089C	RLM1	0.144
YKL191W	DPH2	YLR292C	SEC72	0.137
YKL191W	DPH2	YDR395W	SXM1	0.136
YKL191W	DPH2	YKL056C	TMA19	0.134
YKL191W	DPH2	YNL089C	YNL089C	0.13
YKL191W	DPH2	YHR189W	PTH1	0.128
YKL191W	DPH2	YPL018W	CTF19	0.128
YKL191W	DPH2	YKL185W	ASH1	0.126
YKL191W	DPH2	YDL113C	ATG20	0.124
YKL191W	DPH2	YCR079W	PTC6	0.123
YKL191W	DPH2	YDR209C	YDR209C	0.123
YKL191W	DPH2	YKL086W	SRX1	0.123
YKL191W	DPH2	YPL066W	YPL066W	0.12
YKL191W	DPH2	YPR046W	MCM16	0.117
YKL191W	DPH2	YBL061C	SKT5	0.116
YKL191W	DPH2	YJL149W	DAS1	0.116
YKL191W	DPH2	YPR076W	YPR076W	0.116
YKL191W	DPH2	YGR023W	MTL1	0.115
YKL191W	DPH2	YKL136W	YKL136W	0.115
YKL191W	DPH2	YKL120W	OAC1	0.114
YKL191W	DPH2	YPR075C	OPY2	0.113
YKL191W	DPH2	YPL017C	IRC15	0.112
YKL191W	DPH2	YBR107C	IML3	0.111
YKL191W	DPH2	YDL203C	ACK1	0.111
YKL191W	DPH2	YOR076C	SKI7	0.111
YKL191W	DPH2	YNL001W	DOM34	0.11
YKL191W	DPH2	YNL058C	YNL058C	0.11
YKL191W	DPH2	YPR118W	MRI1	0.11
YKL191W	DPH2	YAL058C-A	YAL058C-A	0.109
YKL191W	DPH2	YBR083W	TEC1	0.108
YKL191W	DPH2	YKL079W	SMY1	0.108
YKL191W	DPH2	YOL030W	GAS5	0.108
YKL191W	DPH2	YBR023C	CHS3	0.107
YKL191W	DPH2	YLL043W	FPS1	0.107
YKL191W	DPH2	YER090W	TRP2	0.105
YKL191W	DPH2	YER155C	BEM2	0.105
YKL191W	DPH2	YDR445C	YDR445C	0.104
YKL191W	DPH2	YCR077C	PAT1	0.103
YKL191W	DPH2	YLR047C	FRE8	0.103
YKL191W	DPH2	YOR243C	PUS7	0.103
YKL191W	DPH2	YPL207W	TYW1	0.103
YKL191W	DPH2	YDL137W	ARF2	0.101
YKL191W	DPH2	YDR007W	TRP1	0.101
YKL191W	DPH2	YDR352W	YDR352W	0.101
YKL191W	DPH2	YLR041W	YLR041W	0.101
YKL191W	DPH2	YBR229C	ROT2	0.1
YKL191W	DPH2	YDR312W	SSF2	0.1
YKL191W	DPH2	YKR095W	MLP1	0.1
YKL191W	DPH2	YNR042W	YNR042W	0.1
YKL191W	DPH2	YBL062W	YBL062W	0.099
YKL191W	DPH2	YGR079W	YGR079W	0.099
YKL191W	DPH2	YGR184C	UBR1	0.099
YKL191W	DPH2	YJL095W	BCK1	0.099
YKL191W	DPH2	YPR126C	YPR126C	0.099
YKL191W	DPH2	YDL129W	YDL129W	0.098
YKL191W	DPH2	YLR238W	FAR10	0.098
YKL191W	DPH2	YMR127C	SAS2	0.098
YKL191W	DPH2	YNL071W	LAT1	0.098
YKL191W	DPH2	YKL130C	SHE2	0.097
YKL191W	DPH2	YLR094C	GIS3	0.097
YKL191W	DPH2	YLR188W	MDL1	0.097
YKL191W	DPH2	YFL031W	HAC1	0.096
YKL191W	DPH2	YKR051W	YKR051W	0.096
YKL191W	DPH2	YLR233C	EST1	0.096
YKL191W	DPH2	YLR446W	YLR446W	0.096
YKL191W	DPH2	YOR220W	RCN2	0.096
YKL191W	DPH2	YDL053C	PBP4	0.095
YKL191W	DPH2	YJR135C	MCM22	0.095
YKL191W	DPH2	YKL094W	YJU3	0.095
YKL191W	DPH2	YOL054W	PSH1	0.095
YKL191W	DPH2	YJR014W	TMA22	0.094
YKL191W	DPH2	YKR084C	HBS1	0.094
YKL191W	DPH2	YLR095C	IOC2	0.094
YKL191W	DPH2	YNL090W	RHO2	0.094
YKL191W	DPH2	YOL084W	PHM7	0.094
YKL191W	DPH2	YBR045C	GIP1	0.093
YKL191W	DPH2	YER044C-A	MEI4	0.093
YKL191W	DPH2	YER087C-A	YER087C-A	0.093
YKL191W	DPH2	YJL134W	LCB3	0.093
YKL191W	DPH2	YKR024C	DBP7	0.093
YKL191W	DPH2	YKL168C	KKQ8	0.092
YKL191W	DPH2	YKR019C	IRS4	0.092
YKL191W	DPH2	YKR036C	CAF4	0.092
YKL191W	DPH2	YBR260C	RGD1	0.091
YKL191W	DPH2	YIL041W	GVP36	0.091
YKL191W	DPH2	YPR122W	AXL1	0.091
YKL191W	DPH2	YBR082C	UBC4	0.09
YKL191W	DPH2	YDR077W	SED1	0.09
YKL191W	DPH2	YIR007W	YIR007W	0.09
YKL191W	DPH2	YJL124C	LSM1	0.089
YKL191W	DPH2	YJL187C	SWE1	0.089
YKL191W	DPH2	YOL046C	YOL046C	0.089
YKL191W	DPH2	YOR018W	ROD1	0.089
YKL191W	DPH2	YDR057W	YOS9	0.088
YKL191W	DPH2	YDR385W	EFT2	0.088
YKL191W	DPH2	YER047C	SAP1	0.088
YKL191W	DPH2	YLR271W	YLR271W	0.088
YKL191W	DPH2	YAL030W	SNC1	0.087
YKL191W	DPH2	YDR202C	RAV2	0.087
YKL191W	DPH2	YDR333C	YDR333C	0.087
YKL191W	DPH2	YIL077C	YIL077C	0.087
YKL191W	DPH2	YKR041W	YKR041W	0.087
YKL191W	DPH2	YLR412W	BER1	0.087
YKL191W	DPH2	YOL063C	CRT10	0.087
YKL191W	DPH2	YPR114W	YPR114W	0.087
YKL191W	DPH2	YDR318W	MCM21	0.086
YKL191W	DPH2	YPL032C	SVL3	0.086
YKL191W	DPH2	YPL035C	YPL035C	0.086
YKL191W	DPH2	YCL009C	ILV6	0.085
YKL191W	DPH2	YGR072W	UPF3	0.085
YKL191W	DPH2	YLL060C	GTT2	0.085
YKL191W	DPH2	YLR390W-A	CCW14	0.085
YKL191W	DPH2	YML038C	YMD8	0.085
YKL191W	DPH2	YOR126C	IAH1	0.085
YKL191W	DPH2	YGR022C	YGR022C	0.084
YKL191W	DPH2	YLR289W	GUF1	0.084
YKL191W	DPH2	YLR308W	CDA2	0.084
YKL191W	DPH2	YER181C	YER181C	0.083
YKL191W	DPH2	YGR071C	YGR071C	0.083
YKL191W	DPH2	YJL117W	PHO86	0.083
YKL191W	DPH2	YML117W	NAB6	0.083
YKL191W	DPH2	YPR095C	SYT1	0.083
YKL191W	DPH2	YBL078C	ATG8	0.082
YKL191W	DPH2	YDR126W	SWF1	0.082
YKL191W	DPH2	YGL014W	PUF4	0.082
YKL191W	DPH2	YIR001C	SGN1	0.082
YKL191W	DPH2	YKL020C	SPT23	0.082
YKL191W	DPH2	YML016C	PPZ1	0.082
YKL191W	DPH2	YGL094C	PAN2	0.081
YKL191W	DPH2	YMR036C	MIH1	0.081
YKL191W	DPH2	YPL008W	CHL1	0.081
YKL191W	DPH2	YAR030C	YAR030C	0.08
YKL191W	DPH2	YBR033W	EDS1	0.08
YKL191W	DPH2	YDR073W	SNF11	0.08
YKL191W	DPH2	YER177W	BMH1	0.08
YKL191W	DPH2	YGR182C	YGR182C	0.08
YKL191W	DPH2	YGR275W	RTT102	0.08
YKL191W	DPH2	YML119W	YML119W	0.08
YKL191W	DPH2	YMR052W	FAR3	0.08
YKL191W	DPH2	YOR196C	LIP5	0.08
YKL191W	DPH2	YOR320C	GNT1	0.08
YKL191W	DPH2	YBR164C	ARL1	0.079
YKL191W	DPH2	YDL161W	ENT1	0.079
YKL191W	DPH2	YDR351W	SBE2	0.079
YKL191W	DPH2	YDR444W	YDR444W	0.079
YKL191W	DPH2	YGL004C	RPN14	0.079
YKL191W	DPH2	YGL043W	DST1	0.079
YKL191W	DPH2	YHL044W	YHL044W	0.079
YKL191W	DPH2	YLR098C	CHA4	0.079
YKL191W	DPH2	YLR386W	VAC14	0.079
YKL191W	DPH2	YNR022C	MRPL50	0.079
YKL191W	DPH2	YOL003C	PFA4	0.079
YKL191W	DPH2	YPL027W	SMA1	0.079
YKL191W	DPH2	YDR335W	MSN5	0.078
YKL191W	DPH2	YHR132W-A	IGO2	0.078
YKL191W	DPH2	YKL129C	MYO3	0.078
YKL191W	DPH2	YKL221W	MCH2	0.078
YKL191W	DPH2	YLR356W	YLR356W	0.078
YKL191W	DPH2	YLR443W	ECM7	0.078
YKL191W	DPH2	YNR048W	YNR048W	0.078
YKL191W	DPH2	YPL091W	GLR1	0.078
YKL191W	DPH2	YBR078W	ECM33	0.077
YKL191W	DPH2	YCL028W	RNQ1	0.077
YKL191W	DPH2	YCR030C	SYP1	0.077
YKL191W	DPH2	YDR251W	PAM1	0.077
YKL191W	DPH2	YFR007W	YFH7	0.077
YKL191W	DPH2	YGL121C	GPG1	0.077
YKL191W	DPH2	YLR043C	TRX1	0.077
YKL191W	DPH2	YML042W	CAT2	0.077
YKL191W	DPH2	YOR324C	FRT1	0.077
YKL191W	DPH2	YPL155C	KIP2	0.077
YKL191W	DPH2	YPL229W	YPL229W	0.077
YKL191W	DPH2	YDL025C	YDL025C	0.076
YKL191W	DPH2	YDR205W	MSC2	0.076
YKL191W	DPH2	YHR075C	PPE1	0.076
YKL191W	DPH2	YMR191W	SPG5	0.076
YKL191W	DPH2	YPL219W	PCL8	0.076
YKL191W	DPH2	YBL001C	ECM15	0.075
YKL191W	DPH2	YCL051W	LRE1	0.075
YKL191W	DPH2	YIL073C	SPO22	0.075
YKL191W	DPH2	YLR326W	YLR326W	0.075
YKL191W	DPH2	YNR024W	MPP6	0.075
YKL191W	DPH2	YAL036C	RBG1	0.074
YKL191W	DPH2	YDR309C	GIC2	0.074
YKL191W	DPH2	YDR349C	YPS7	0.074
YKL191W	DPH2	YML035C-A	YML035C-A	0.074
YKL191W	DPH2	YNR069C	BSC5	0.074
YKL191W	DPH2	YPL060W	LPE10	0.074
YKL191W	DPH2	YAL046C	AIM1	0.073
YKL191W	DPH2	YBL051C	PIN4	0.073
YKL191W	DPH2	YBR188C	NTC20	0.073
YKL191W	DPH2	YCL074W	YCL074W	0.073
YKL191W	DPH2	YCR020C	PET18	0.073
YKL191W	DPH2	YDL122W	UBP1	0.073
YKL191W	DPH2	YDL241W	YDL241W	0.073
YKL191W	DPH2	YDR326C	YSP2	0.073
YKL191W	DPH2	YGL027C	CWH41	0.073
YKL191W	DPH2	YJR115W	YJR115W	0.073
YKL191W	DPH2	YLR248W	RCK2	0.073
YKL191W	DPH2	YML005W	TRM12	0.073
YKL191W	DPH2	YMR085W	YMR085W	0.073
YKL191W	DPH2	YNL100W	AIM37	0.073
YKL191W	DPH2	YNL155W	YNL155W	0.073
YKL191W	DPH2	YOR107W	RGS2	0.073
YKL191W	DPH2	YOR364W	YOR364W	0.073
YKL191W	DPH2	YPL223C	GRE1	0.073
YKL191W	DPH2	YPL232W	SSO1	0.073
YKL191W	DPH2	YDL173W	PAR32	0.072
YKL191W	DPH2	YDL236W	PHO13	0.072
YKL191W	DPH2	YDR220C	YDR220C	0.072
YKL191W	DPH2	YLR080W	EMP46	0.072
YKL191W	DPH2	YAL020C	ATS1	0.071
YKL191W	DPH2	YAL051W	OAF1	0.071
YKL191W	DPH2	YBR065C	ECM2	0.071
YKL191W	DPH2	YDR250C	YDR250C	0.071
YKL191W	DPH2	YER158C	YER158C	0.071
YKL191W	DPH2	YHR142W	CHS7	0.071
YKL191W	DPH2	YIL134W	FLX1	0.071
YKL191W	DPH2	YNR002C	ATO2	0.071
YKL191W	DPH2	YBR259W	YBR259W	0.07
YKL191W	DPH2	YCL076W	YCL076W	0.07
YKL191W	DPH2	YCR059C	YIH1	0.07
YKL191W	DPH2	YER062C	HOR2	0.07
YKL191W	DPH2	YGR187C	HGH1	0.07
YKL191W	DPH2	YGR227W	DIE2	0.07
YKL191W	DPH2	YHR015W	MIP6	0.07
YKL191W	DPH2	YHR077C	NMD2	0.07
YKL191W	DPH2	YHR079C	IRE1	0.07
YKL191W	DPH2	YKL081W	TEF4	0.07
YKL191W	DPH2	YLL021W	SPA2	0.07
YKL191W	DPH2	YLR072W	YLR072W	0.07
YKL191W	DPH2	YLR392C	YLR392C	0.07
YKL191W	DPH2	YMR110C	HFD1	0.07
YKL191W	DPH2	YNR049C	MSO1	0.07
YKL191W	DPH2	YOL018C	TLG2	0.07
YKL191W	DPH2	YOR015W	YOR015W	0.07
YKL191W	DPH2	YPL034W	YPL034W	0.07
YKL191W	DPH2	YPR145W	ASN1	0.07
YKL191W	DPH2	YBL071C	YBL071C	0.069
YKL191W	DPH2	YBR042C	CST26	0.069
YKL191W	DPH2	YBR261C	TAE1	0.069
YKL191W	DPH2	YDR185C	UPS3	0.069
YKL191W	DPH2	YHR121W	LSM12	0.069
YKL191W	DPH2	YKL023W	YKL023W	0.069
YKL191W	DPH2	YKL053C-A	MDM35	0.069
YKL191W	DPH2	YLR219W	MSC3	0.069
YKL191W	DPH2	YMR022W	UBC7	0.069
YKL191W	DPH2	YNL153C	GIM3	0.069
YKL191W	DPH2	YOL116W	MSN1	0.069
YKL191W	DPH2	YOR008C-A	YOR008C-A	0.069
YKL191W	DPH2	YPL145C	KES1	0.069
YKL191W	DPH2	YPR031W	NTO1	0.069
YKL191W	DPH2	YCR102W-A	YCR102W-A	0.068
YKL191W	DPH2	YDL211C	YDL211C	0.068
YKL191W	DPH2	YDR056C	YDR056C	0.068
YKL191W	DPH2	YDR155C	CPR1	0.068
YKL191W	DPH2	YFR026C	ULI1	0.068
YKL191W	DPH2	YGL007W	BRP1	0.068
YKL191W	DPH2	YGR139W	YGR139W	0.068
YKL191W	DPH2	YGR230W	BNS1	0.068
YKL191W	DPH2	YIL120W	QDR1	0.068
YKL191W	DPH2	YJR149W	YJR149W	0.068
YKL191W	DPH2	YKL190W	CNB1	0.068
YKL191W	DPH2	YKR039W	GAP1	0.068
YKL191W	DPH2	YLR381W	CTF3	0.068
YKL191W	DPH2	YMR040W	YET2	0.068
YKL191W	DPH2	YOL045W	PSK2	0.068
YKL191W	DPH2	YOR021C	YOR021C	0.068
YKL191W	DPH2	YPL253C	VIK1	0.068
YKL191W	DPH2	YAL042W	ERV46	0.067
YKL191W	DPH2	YDL012C	YDL012C	0.067
YKL191W	DPH2	YDR281C	PHM6	0.067
YKL191W	DPH2	YER091C	MET6	0.067
YKL191W	DPH2	YFL032W	YFL032W	0.067
YKL191W	DPH2	YLR332W	MID2	0.067
YKL191W	DPH2	YOL082W	ATG19	0.067
YKL191W	DPH2	YPL069C	BTS1	0.067
YKL191W	DPH2	YDL036C	PUS9	0.066
YKL191W	DPH2	YGL037C	PNC1	0.066
YKL191W	DPH2	YIL014W	MNT3	0.066
YKL191W	DPH2	YIL113W	SDP1	0.066
YKL191W	DPH2	YIL162W	SUC2	0.066
YKL191W	DPH2	YIR016W	YIR016W	0.066
YKL191W	DPH2	YJL141C	YAK1	0.066
YKL191W	DPH2	YJL145W	SFH5	0.066
YKL191W	DPH2	YKR058W	GLG1	0.066
YKL191W	DPH2	YLR003C	CMS1	0.066
YKL191W	DPH2	YML019W	OST6	0.066
YKL191W	DPH2	YNL016W	PUB1	0.066
YKL191W	DPH2	YOR121C	YOR121C	0.066
YKL191W	DPH2	YOR333C	YOR333C	0.066
YKL191W	DPH2	YBR067C	TIP1	0.065
YKL191W	DPH2	YCL035C	GRX1	0.065
YKL191W	DPH2	YDL006W	PTC1	0.065
YKL191W	DPH2	YER113C	TMN3	0.065
YKL191W	DPH2	YGR217W	CCH1	0.065
YKL191W	DPH2	YIL007C	NAS2	0.065
YKL191W	DPH2	YIL159W	BNR1	0.065
YKL191W	DPH2	YKL213C	DOA1	0.065
YKL191W	DPH2	YLR353W	BUD8	0.065
YKL191W	DPH2	YNL043C	YNL043C	0.065
YKL191W	DPH2	YOL008W	COQ10	0.065
YKL191W	DPH2	YPR198W	SGE1	0.065
YKL191W	DPH2	YDL080C	THI3	0.064
YKL191W	DPH2	YDL112W	TRM3	0.064
YKL191W	DPH2	YDR124W	YDR124W	0.064
YKL191W	DPH2	YDR254W	CHL4	0.064
YKL191W	DPH2	YFL052W	YFL052W	0.064
YKL191W	DPH2	YGR040W	KSS1	0.064
YKL191W	DPH2	YGR270W	YTA7	0.064
YKL191W	DPH2	YHR097C	YHR097C	0.064
YKL191W	DPH2	YIL043C	CBR1	0.064
YKL191W	DPH2	YJL047C	RTT101	0.064
YKL191W	DPH2	YKL046C	DCW1	0.064
YKL191W	DPH2	YKL096W-A	CWP2	0.064
YKL191W	DPH2	YKR050W	TRK2	0.064
YKL191W	DPH2	YMR124W	YMR124W	0.064
YKL191W	DPH2	YDR120C	TRM1	0.063
YKL191W	DPH2	YDR218C	SPR28	0.063
YKL191W	DPH2	YDR272W	GLO2	0.063
YKL191W	DPH2	YHR153C	SPO16	0.063
YKL191W	DPH2	YIL005W	EPS1	0.063
YKL191W	DPH2	YNL010W	YNL010W	0.063
YKL191W	DPH2	YDR181C	SAS4	0.062
YKL191W	DPH2	YDR399W	HPT1	0.062
YKL191W	DPH2	YDR415C	YDR415C	0.062
YKL191W	DPH2	YGL156W	AMS1	0.062
YKL191W	DPH2	YGL213C	SKI8	0.062
YKL191W	DPH2	YGR058W	PEF1	0.062
YKL191W	DPH2	YJL099W	CHS6	0.062
YKL191W	DPH2	YKL222C	YKL222C	0.062
YKL191W	DPH2	YLR342W	FKS1	0.062
YKL191W	DPH2	YOR111W	YOR111W	0.062
YKL191W	DPH2	YBR145W	ADH5	0.061
YKL191W	DPH2	YBR245C	ISW1	0.061
YKL191W	DPH2	YDR111C	ALT2	0.061
YKL191W	DPH2	YDR463W	STP1	0.061
YKL191W	DPH2	YFR040W	SAP155	0.061
YKL191W	DPH2	YJR117W	STE24	0.061
YKL191W	DPH2	YJR127C	RSF2	0.061
YKL191W	DPH2	YKL072W	STB6	0.061
YKL191W	DPH2	YKL124W	SSH4	0.061
YKL191W	DPH2	YMR180C	CTL1	0.061
YKL191W	DPH2	YNL044W	YIP3	0.061
YKL191W	DPH2	YOL047C	YOL047C	0.061
YKL191W	DPH2	YOR242C	SSP2	0.061
YKL191W	DPH2	YCR087W	YCR087W	0.06
YKL191W	DPH2	YDR142C	PEX7	0.06
YKL191W	DPH2	YFR016C	YFR016C	0.06
YKL191W	DPH2	YGL009C	LEU1	0.06
YKL191W	DPH2	YLL006W	MMM1	0.06
YKL191W	DPH2	YLR453C	RIF2	0.06
YKL191W	DPH2	YML037C	YML037C	0.06
YKL191W	DPH2	YOL081W	IRA2	0.06
YKL191W	DPH2	YOR115C	TRS33	0.06
YKL191W	DPH2	YCR048W	ARE1	0.059
YKL191W	DPH2	YDR011W	SNQ2	0.059
YKL191W	DPH2	YER056C	FCY2	0.059
YKL191W	DPH2	YGL162W	SUT1	0.059
YKL191W	DPH2	YGR196C	FYV8	0.059
YKL191W	DPH2	YIR003W	AIM21	0.059
YKL191W	DPH2	YKR093W	PTR2	0.059
YKL191W	DPH2	YLR363C	NMD4	0.059
YKL191W	DPH2	YML002W	YML002W	0.059
YKL191W	DPH2	YMR160W	YMR160W	0.059
YKL191W	DPH2	YOR014W	RTS1	0.059
YKL191W	DPH2	YOR135C	IRC14	0.059
YKL191W	DPH2	YOR195W	SLK19	0.059
YKL191W	DPH2	YPL165C	SET6	0.059
YKL191W	DPH2	YPR156C	TPO3	0.059
YKL191W	DPH2	YBR219C	YBR219C	0.058
YKL191W	DPH2	YCL024W	KCC4	0.058
YKL191W	DPH2	YCR045C	YCR045C	0.058
YKL191W	DPH2	YDL071C	YDL071C	0.058
YKL191W	DPH2	YDL175C	AIR2	0.058
YKL191W	DPH2	YER119C	AVT6	0.058
YKL191W	DPH2	YGR292W	MAL12	0.058
YKL191W	DPH2	YHR104W	GRE3	0.058
YKL191W	DPH2	YIL030C	SSM4	0.058
YKL191W	DPH2	YIL098C	FMC1	0.058
YKL191W	DPH2	YJL181W	YJL181W	0.058
YKL191W	DPH2	YJR001W	AVT1	0.058
YKL191W	DPH2	YKL071W	YKL071W	0.058
YKL191W	DPH2	YLR046C	YLR046C	0.058
YKL191W	DPH2	YLR389C	STE23	0.058
YKL191W	DPH2	YML001W	YPT7	0.058
YKL191W	DPH2	YMR044W	IOC4	0.058
YKL191W	DPH2	YPL057C	SUR1	0.058
YKL191W	DPH2	YPL247C	YPL247C	0.058
YKL191W	DPH2	YDR466W	PKH3	0.057
YKL191W	DPH2	YER091C-A	YER091C-A	0.057
YKL191W	DPH2	YGR027C	RPS25A	0.057
YKL191W	DPH2	YHR030C	SLT2	0.057
YKL191W	DPH2	YKR069W	MET1	0.057
YKL191W	DPH2	YLR371W	ROM2	0.057
YKL191W	DPH2	YMR102C	YMR102C	0.057
YKL191W	DPH2	YOR334W	MRS2	0.057
YKL191W	DPH2	YOR379C	YOR379C	0.057
YKL191W	DPH2	YPL227C	ALG5	0.057
YKL191W	DPH2	YPL245W	YPL245W	0.057
YKL191W	DPH2	YPR125W	YLH47	0.057
YKL191W	DPH2	YBR169C	SSE2	0.056
YKL191W	DPH2	YBR215W	HPC2	0.056
YKL191W	DPH2	YBR300C	YBR300C	0.056
YKL191W	DPH2	YDL095W	PMT1	0.056
YKL191W	DPH2	YDR015C	YDR015C	0.056
YKL191W	DPH2	YDR535C	YDR535C	0.056
YKL191W	DPH2	YER071C	YER071C	0.056
YKL191W	DPH2	YGL053W	PRM8	0.056
YKL191W	DPH2	YGR041W	BUD9	0.056
YKL191W	DPH2	YHR181W	SVP26	0.056
YKL191W	DPH2	YOR140W	SFL1	0.056
YKL191W	DPH2	YOR240W	YOR240W	0.056
YKL191W	DPH2	YPL064C	CWC27	0.056
YKL191W	DPH2	YPR201W	ARR3	0.056
YKL191W	DPH2	YDL051W	LHP1	0.055
YKL191W	DPH2	YER164W	CHD1	0.055
YKL191W	DPH2	YGL158W	RCK1	0.055
YKL191W	DPH2	YIL166C	YIL166C	0.055
YKL191W	DPH2	YJL036W	SNX4	0.055
YKL191W	DPH2	YJL171C	YJL171C	0.055
YKL191W	DPH2	YLR236C	YLR236C	0.055
YKL191W	DPH2	YLR266C	PDR8	0.055
YKL191W	DPH2	YLR319C	BUD6	0.055
YKL191W	DPH2	YLR384C	IKI3	0.055
YKL191W	DPH2	YML012W	ERV25	0.055
YKL191W	DPH2	YML033W	YML033W	0.055
YKL191W	DPH2	YMR294W	JNM1	0.055
YKL191W	DPH2	YOL007C	CSI2	0.055
YKL191W	DPH2	YOR085W	OST3	0.055
YKL191W	DPH2	YOR108W	LEU9	0.055
YKL191W	DPH2	YPR003C	YPR003C	0.055
YKL191W	DPH2	YPR141C	KAR3	0.055
YKL191W	DPH2	YPR189W	SKI3	0.055
YKL191W	DPH2	YAL034C	FUN19	0.054
YKL191W	DPH2	YBR275C	RIF1	0.054
YKL191W	DPH2	YBR276C	PPS1	0.054
YKL191W	DPH2	YCR011C	ADP1	0.054
YKL191W	DPH2	YGL114W	YGL114W	0.054
YKL191W	DPH2	YJL188C	BUD19	0.054
YKL191W	DPH2	YKL162C	YKL162C	0.054
YKL191W	DPH2	YLR023C	IZH3	0.054
YKL191W	DPH2	YMR194C-A	YMR194C-A	0.054
YKL191W	DPH2	YNR025C	YNR025C	0.054
YKL191W	DPH2	YOR338W	YOR338W	0.054
YKL191W	DPH2	YPL257W	YPL257W	0.054
YKL191W	DPH2	YBR076W	ECM8	0.053
YKL191W	DPH2	YBR239C	ERT1	0.053
YKL191W	DPH2	YDL144C	YDL144C	0.053
YKL191W	DPH2	YER149C	PEA2	0.053
YKL191W	DPH2	YGL210W	YPT32	0.053
YKL191W	DPH2	YGR135W	PRE9	0.053
YKL191W	DPH2	YGR247W	CPD1	0.053
YKL191W	DPH2	YGR250C	YGR250C	0.053
YKL191W	DPH2	YHL009C	YAP3	0.053
YKL191W	DPH2	YIL047C	SYG1	0.053
YKL191W	DPH2	YJL206C	YJL206C	0.053
YKL191W	DPH2	YKL208W	CBT1	0.053
YKL191W	DPH2	YKR027W	BCH2	0.053
YKL191W	DPH2	YMR080C	NAM7	0.053
YKL191W	DPH2	YMR172W	HOT1	0.053
YKL191W	DPH2	YMR258C	YMR258C	0.053
YKL191W	DPH2	YNL093W	YPT53	0.053
YKL191W	DPH2	YNR015W	SMM1	0.053
YKL191W	DPH2	YNR047W	FPK1	0.053
YKL191W	DPH2	YOR298C-A	MBF1	0.053
YKL191W	DPH2	YPL051W	ARL3	0.053
YKL191W	DPH2	YPR023C	EAF3	0.053
YKL191W	DPH2	YAR044W	YAR044W	0.052
YKL191W	DPH2	YBL046W	PSY4	0.052
YKL191W	DPH2	YBR221C	PDB1	0.052
YKL191W	DPH2	YDR099W	BMH2	0.052
YKL191W	DPH2	YDR112W	IRC2	0.052
YKL191W	DPH2	YDR291W	HRQ1	0.052
YKL191W	DPH2	YGR066C	YGR066C	0.052
YKL191W	DPH2	YGR124W	ASN2	0.052
YKL191W	DPH2	YHR035W	YHR035W	0.052
YKL191W	DPH2	YJR060W	CBF1	0.052
YKL191W	DPH2	YLL017W	YLL017W	0.052
YKL191W	DPH2	YLR035C	MLH2	0.052
YKL191W	DPH2	YMR087W	YMR087W	0.052
YKL191W	DPH2	YNL008C	ASI3	0.052
YKL191W	DPH2	YOL073C	YOL073C	0.052
YKL191W	DPH2	YOL104C	NDJ1	0.052
YKL191W	DPH2	YPR052C	NHP6A	0.052
YKL191W	DPH2	YAL029C	MYO4	0.051
YKL191W	DPH2	YBL042C	FUI1	0.051
YKL191W	DPH2	YBR050C	REG2	0.051
YKL191W	DPH2	YBR084W	MIS1	0.051
YKL191W	DPH2	YBR176W	ECM31	0.051
YKL191W	DPH2	YDR315C	IPK1	0.051
YKL191W	DPH2	YHL023C	RMD11	0.051
YKL191W	DPH2	YHL028W	WSC4	0.051
YKL191W	DPH2	YIL054W	YIL054W	0.051
YKL191W	DPH2	YJR031C	GEA1	0.051
YKL191W	DPH2	YKL102C	YKL102C	0.051
YKL191W	DPH2	YLR334C	YLR334C	0.051
YKL191W	DPH2	YMR173W	DDR48	0.051
YKL191W	DPH2	YMR299C	DYN3	0.051
YKL191W	DPH2	YNL125C	ESBP6	0.051
YKL191W	DPH2	YOR253W	NAT5	0.051
YKL191W	DPH2	YPL112C	PEX25	0.051
YKL191W	DPH2	YAL049C	AIM2	0.05
YKL191W	DPH2	YCL040W	GLK1	0.05
YKL191W	DPH2	YDR005C	MAF1	0.05
YKL191W	DPH2	YDR278C	YDR278C	0.05
YKL191W	DPH2	YDR528W	HLR1	0.05
YKL191W	DPH2	YGL221C	NIF3	0.05
YKL191W	DPH2	YGL226C-A	OST5	0.05
YKL191W	DPH2	YGR101W	PCP1	0.05
YKL191W	DPH2	YGR231C	PHB2	0.05
YKL191W	DPH2	YIL123W	SIM1	0.05
YKL191W	DPH2	YIL145C	PAN6	0.05
YKL191W	DPH2	YKL044W	YKL044W	0.05
YKL191W	DPH2	YKL077W	YKL077W	0.05
YKL191W	DPH2	YKR003W	OSH6	0.05
YKL191W	DPH2	YLR070C	XYL2	0.05
YKL191W	DPH2	YLR349W	YLR349W	0.05
YKL191W	DPH2	YML057W	CMP2	0.05
YKL191W	DPH2	YML059C	NTE1	0.05
YKL191W	DPH2	YMR259C	YMR259C	0.05
YKL191W	DPH2	YNL028W	YNL028W	0.05
YKL191W	DPH2	YPL086C	ELP3	0.05
YKL191W	DPH2	YPR022C	YPR022C	0.05
YKL191W	DPH2	YCL023C	YCL023C	0.049
YKL191W	DPH2	YDL085W	NDE2	0.049
YKL191W	DPH2	YDR093W	DNF2	0.049
YKL191W	DPH2	YER142C	MAG1	0.049
YKL191W	DPH2	YFL027C	GYP8	0.049
YKL191W	DPH2	YFL046W	FMP32	0.049
YKL191W	DPH2	YGR221C	TOS2	0.049
YKL191W	DPH2	YHL043W	ECM34	0.049
YKL191W	DPH2	YHR032W	YHR032W	0.049
YKL191W	DPH2	YIL137C	TMA108	0.049
YKL191W	DPH2	YJR119C	JHD2	0.049
YKL191W	DPH2	YKR080W	MTD1	0.049
YKL191W	DPH2	YLR377C	FBP1	0.049
YKL191W	DPH2	YLR394W	CST9	0.049
YKL191W	DPH2	YML067C	ERV41	0.049
YKL191W	DPH2	YMR020W	FMS1	0.049
YKL191W	DPH2	YMR207C	HFA1	0.049
YKL191W	DPH2	YMR319C	FET4	0.049
YKL191W	DPH2	YNL003C	PET8	0.049
YKL191W	DPH2	YNL147W	LSM7	0.049
YKL191W	DPH2	YOR017W	PET127	0.049
YKL191W	DPH2	YOR053W	YOR053W	0.049
YKL191W	DPH2	YOR351C	MEK1	0.049
YKL191W	DPH2	YPL123C	RNY1	0.049
YKL191W	DPH2	YPL183C	RTT10	0.049
YKL191W	DPH2	YPR151C	SUE1	0.049
YKL191W	DPH2	YBR207W	FTH1	0.048
YKL191W	DPH2	YCL027W	FUS1	0.048
YKL191W	DPH2	YDL027C	YDL027C	0.048
YKL191W	DPH2	YDL086W	YDL086W	0.048
YKL191W	DPH2	YDR001C	NTH1	0.048
YKL191W	DPH2	YDR239C	YDR239C	0.048
YKL191W	DPH2	YDR446W	ECM11	0.048
YKL191W	DPH2	YDR509W	YDR509W	0.048
YKL191W	DPH2	YIL088C	AVT7	0.048
YKL191W	DPH2	YIL119C	RPI1	0.048
YKL191W	DPH2	YJL215C	YJL215C	0.048
YKL191W	DPH2	YJR078W	BNA2	0.048
YKL191W	DPH2	YKL107W	YKL107W	0.048
YKL191W	DPH2	YKL183W	LOT5	0.048
YKL191W	DPH2	YLL001W	DNM1	0.048
YKL191W	DPH2	YLL024C	SSA2	0.048
YKL191W	DPH2	YLR361C	DCR2	0.048
YKL191W	DPH2	YMR126C	DLT1	0.048
YKL191W	DPH2	YNL078W	NIS1	0.048
YKL191W	DPH2	YOL112W	MSB4	0.048
YKL191W	DPH2	YOR072W	YOR072W	0.048
YKL191W	DPH2	YPL110C	GDE1	0.048
YKL191W	DPH2	YBR053C	YBR053C	0.047
YKL191W	DPH2	YDR010C	YDR010C	0.047
YKL191W	DPH2	YDR032C	PST2	0.047
YKL191W	DPH2	YDR214W	AHA1	0.047
YKL191W	DPH2	YDR245W	MNN10	0.047
YKL191W	DPH2	YDR247W	VHS1	0.047
YKL191W	DPH2	YDR430C	CYM1	0.047
YKL191W	DPH2	YDR431W	YDR431W	0.047
YKL191W	DPH2	YGL036W	YGL036W	0.047
YKL191W	DPH2	YGR035C	YGR035C	0.047
YKL191W	DPH2	YJL164C	TPK1	0.047
YKL191W	DPH2	YJL172W	CPS1	0.047
YKL191W	DPH2	YJR130C	STR2	0.047
YKL191W	DPH2	YKL176C	LST4	0.047
YKL191W	DPH2	YKL205W	LOS1	0.047
YKL191W	DPH2	YKR021W	ALY1	0.047
YKL191W	DPH2	YKR106W	YKR106W	0.047
YKL191W	DPH2	YML029W	USA1	0.047
YKL191W	DPH2	YMR017W	SPO20	0.047
YKL191W	DPH2	YOL014W	YOL014W	0.047
YKL191W	DPH2	YOL053W	AIM39	0.047
YKL191W	DPH2	YOR167C	RPS28A	0.047
YKL191W	DPH2	YOR235W	IRC13	0.047
YKL191W	DPH2	YPL072W	UBP16	0.047
YKL191W	DPH2	YPL113C	YPL113C	0.047
YKL191W	DPH2	YPR150W	YPR150W	0.047
YKL191W	DPH2	YBL096C	YBL096C	0.046
YKL191W	DPH2	YBR034C	HMT1	0.046
YKL191W	DPH2	YBR085W	AAC3	0.046
YKL191W	DPH2	YBR242W	YBR242W	0.046
YKL191W	DPH2	YBR272C	HSM3	0.046
YKL191W	DPH2	YDR508C	GNP1	0.046
YKL191W	DPH2	YGL146C	YGL146C	0.046
YKL191W	DPH2	YGL159W	YGL159W	0.046
YKL191W	DPH2	YGR210C	YGR210C	0.046
YKL191W	DPH2	YHR043C	DOG2	0.046
YKL191W	DPH2	YHR073W	OSH3	0.046
YKL191W	DPH2	YHR178W	STB5	0.046
YKL191W	DPH2	YIL029C	YIL029C	0.046
YKL191W	DPH2	YKL093W	MBR1	0.046
YKL191W	DPH2	YLR053C	YLR053C	0.046
YKL191W	DPH2	YLR220W	CCC1	0.046
YKL191W	DPH2	YLR451W	LEU3	0.046
YKL191W	DPH2	YML003W	YML003W	0.046
YKL191W	DPH2	YMR015C	ERG5	0.046
YKL191W	DPH2	YMR155W	YMR155W	0.046
YKL191W	DPH2	YOL075C	YOL075C	0.046
YKL191W	DPH2	YOR316C	COT1	0.046
YKL191W	DPH2	YAL017W	PSK1	0.045
YKL191W	DPH2	YBR141C	YBR141C	0.045
YKL191W	DPH2	YBR283C	SSH1	0.045
YKL191W	DPH2	YCL062W	YCL062W	0.045
YKL191W	DPH2	YDL130W-A	STF1	0.045
YKL191W	DPH2	YDR019C	GCV1	0.045
YKL191W	DPH2	YDR133C	YDR133C	0.045
YKL191W	DPH2	YDR163W	CWC15	0.045
YKL191W	DPH2	YDR263C	DIN7	0.045
YKL191W	DPH2	YER152C	YER152C	0.045
YKL191W	DPH2	YFR030W	MET10	0.045
YKL191W	DPH2	YFR039C	YFR039C	0.045
YKL191W	DPH2	YGR166W	KRE11	0.045
YKL191W	DPH2	YHR006W	STP2	0.045
YKL191W	DPH2	YIL034C	CAP2	0.045
YKL191W	DPH2	YIL058W	YIL058W	0.045
YKL191W	DPH2	YIL140W	AXL2	0.045
YKL191W	DPH2	YIL158W	AIM20	0.045
YKL191W	DPH2	YJL020C	BBC1	0.045
YKL191W	DPH2	YKL017C	HCS1	0.045
YKL191W	DPH2	YKL048C	ELM1	0.045
YKL191W	DPH2	YKR065C	PAM17	0.045
YKL191W	DPH2	YLR082C	SRL2	0.045
YKL191W	DPH2	YLR380W	CSR1	0.045
YKL191W	DPH2	YNR039C	ZRG17	0.045
YKL191W	DPH2	YOL024W	YOL024W	0.045
YKL191W	DPH2	YOL131W	YOL131W	0.045
YKL191W	DPH2	YOR350C	MNE1	0.045
YKL191W	DPH2	YPL105C	SYH1	0.045
YKL191W	DPH2	YPL216W	YPL216W	0.045
YKL191W	DPH2	YPL241C	CIN2	0.045
YKL191W	DPH2	YPR148C	YPR148C	0.045
YKL191W	DPH2	YAL058W	CNE1	0.044
YKL191W	DPH2	YBL017C	PEP1	0.044
YKL191W	DPH2	YDL171C	GLT1	0.044
YKL191W	DPH2	YDR256C	CTA1	0.044
YKL191W	DPH2	YGL039W	YGL039W	0.044
YKL191W	DPH2	YGL242C	YGL242C	0.044
YKL191W	DPH2	YGR276C	RNH70	0.044
YKL191W	DPH2	YHR095W	YHR095W	0.044
YKL191W	DPH2	YIL117C	PRM5	0.044
YKL191W	DPH2	YJL078C	PRY3	0.044
YKL191W	DPH2	YJR033C	RAV1	0.044
YKL191W	DPH2	YJR111C	YJR111C	0.044
YKL191W	DPH2	YKL043W	PHD1	0.044
YKL191W	DPH2	YKL123W	YKL123W	0.044
YKL191W	DPH2	YLL005C	SPO75	0.044
YKL191W	DPH2	YMR279C	YMR279C	0.044
YKL191W	DPH2	YMR295C	IBI2	0.044
YKL191W	DPH2	YOR264W	DSE3	0.044
YKL191W	DPH2	YPL161C	BEM4	0.044
YKL191W	DPH2	YAL056W	GPB2	0.043
YKL191W	DPH2	YBR138C	YBR138C	0.043
YKL191W	DPH2	YDR286C	YDR286C	0.043
YKL191W	DPH2	YFR047C	BNA6	0.043
YKL191W	DPH2	YGL218W	YGL218W	0.043
YKL191W	DPH2	YKL140W	TGL1	0.043
YKL191W	DPH2	YKL187C	YKL187C	0.043
YKL191W	DPH2	YMR182C	RGM1	0.043
YKL191W	DPH2	YMR246W	FAA4	0.043
YKL191W	DPH2	YNL115C	YNL115C	0.043
YKL191W	DPH2	YOR097C	YOR097C	0.043
YKL191W	DPH2	YPR012W	YPR012W	0.043
YKL191W	DPH2	YPR068C	HOS1	0.043
YKL191W	DPH2	YPR193C	HPA2	0.043
YKL191W	DPH2	YBL059W	YBL059W	0.042
YKL191W	DPH2	YBR162C	TOS1	0.042
YKL191W	DPH2	YDL099W	BUG1	0.042
YKL191W	DPH2	YDR097C	MSH6	0.042
YKL191W	DPH2	YDR198C	RKM2	0.042
YKL191W	DPH2	YDR210W	YDR210W	0.042
YKL191W	DPH2	YDR426C	YDR426C	0.042
YKL191W	DPH2	YFL021W	GAT1	0.042
YKL191W	DPH2	YGL035C	MIG1	0.042
YKL191W	DPH2	YGL101W	YGL101W	0.042
YKL191W	DPH2	YGR228W	YGR228W	0.042
YKL191W	DPH2	YGR281W	YOR1	0.042
YKL191W	DPH2	YHR016C	YSC84	0.042
YKL191W	DPH2	YHR139C	SPS100	0.042
YKL191W	DPH2	YIL086C	YIL086C	0.042
YKL191W	DPH2	YIR028W	DAL4	0.042
YKL191W	DPH2	YMR192W	GYL1	0.042
YKL191W	DPH2	YOL027C	MDM38	0.042
YKL191W	DPH2	YOR193W	PEX27	0.042
YKL191W	DPH2	YPL070W	MUK1	0.042
YKL191W	DPH2	YPR004C	AIM45	0.042
YKL191W	DPH2	YAL037W	YAL037W	0.041
YKL191W	DPH2	YDL123W	SNA4	0.041
YKL191W	DPH2	YDL167C	NRP1	0.041
YKL191W	DPH2	YDL192W	ARF1	0.041
YKL191W	DPH2	YFL007W	BLM10	0.041
YKL191W	DPH2	YGL124C	MON1	0.041
YKL191W	DPH2	YIL149C	MLP2	0.041
YKL191W	DPH2	YIR013C	GAT4	0.041
YKL191W	DPH2	YKR047W	YKR047W	0.041
YKL191W	DPH2	YLR152C	YLR152C	0.041
YKL191W	DPH2	YOL086C	ADH1	0.041
YKL191W	DPH2	YOR136W	IDH2	0.041
YKL191W	DPH2	YPL090C	RPS6A	0.041
YKL191W	DPH2	YPR002W	PDH1	0.041
YKL191W	DPH2	YBR201W	DER1	0.04
YKL191W	DPH2	YBR206W	YBR206W	0.04
YKL191W	DPH2	YDL178W	DLD2	0.04
YKL191W	DPH2	YDR371W	CTS2	0.04
YKL191W	DPH2	YDR525W	API2	0.04
YKL191W	DPH2	YGR176W	YGR176W	0.04
YKL191W	DPH2	YHR152W	SPO12	0.04
YKL191W	DPH2	YJR040W	GEF1	0.04
YKL191W	DPH2	YKL115C	YKL115C	0.04
YKL191W	DPH2	YKR087C	OMA1	0.04
YKL191W	DPH2	YLL049W	LDB18	0.04
YKL191W	DPH2	YML047C	PRM6	0.04
YKL191W	DPH2	YML096W	YML096W	0.04
YKL191W	DPH2	YMR130W	YMR130W	0.04
YKL191W	DPH2	YOL029C	YOL029C	0.04
YKL191W	DPH2	YOL129W	VPS68	0.04
YKL191W	DPH2	YOR229W	WTM2	0.04
YKL191W	DPH2	YOR367W	SCP1	0.04
YKL191W	DPH2	YPL240C	HSP82	0.04
YKL191W	DPH2	YAL048C	GEM1	0.039
YKL191W	DPH2	YBL043W	ECM13	0.039
YKL191W	DPH2	YBR126C	TPS1	0.039
YKL191W	DPH2	YCR061W	YCR061W	0.039
YKL191W	DPH2	YDR072C	IPT1	0.039
YKL191W	DPH2	YER123W	YCK3	0.039
YKL191W	DPH2	YGL066W	SGF73	0.039
YKL191W	DPH2	YGR142W	BTN2	0.039
YKL191W	DPH2	YHR079C-B	YHR079C-B	0.039
YKL191W	DPH2	YHR092C	HXT4	0.039
YKL191W	DPH2	YHR133C	NSG1	0.039
YKL191W	DPH2	YIL064W	SEE1	0.039
YKL191W	DPH2	YIR024C	YIR024C	0.039
YKL191W	DPH2	YJL158C	CIS3	0.039
YKL191W	DPH2	YKL110C	KTI12	0.039
YKL191W	DPH2	YKR055W	RHO4	0.039
YKL191W	DPH2	YKR102W	FLO10	0.039
YKL191W	DPH2	YLR063W	YLR063W	0.039
YKL191W	DPH2	YLR122C	YLR122C	0.039
YKL191W	DPH2	YLR246W	ERF2	0.039
YKL191W	DPH2	YLR303W	MET17	0.039
YKL191W	DPH2	YMR243C	ZRC1	0.039
YKL191W	DPH2	YMR253C	YMR253C	0.039
YKL191W	DPH2	YNL066W	SUN4	0.039
YKL191W	DPH2	YOL057W	YOL057W	0.039
YKL191W	DPH2	YOR070C	GYP1	0.039
YKL191W	DPH2	YOR161C	PNS1	0.039
YKL191W	DPH2	YOR182C	RPS30B	0.039
YKL191W	DPH2	YPL114W	YPL114W	0.039
YKL191W	DPH2	YPL116W	HOS3	0.039
YKL191W	DPH2	YPL140C	MKK2	0.039
YKL191W	DPH2	YAL031C	GIP4	0.038
YKL191W	DPH2	YAR002C-A	ERP1	0.038
YKL191W	DPH2	YBR016W	YBR016W	0.038
YKL191W	DPH2	YBR026C	ETR1	0.038
YKL191W	DPH2	YBR056W	YBR056W	0.038
YKL191W	DPH2	YBR073W	RDH54	0.038
YKL191W	DPH2	YBR205W	KTR3	0.038
YKL191W	DPH2	YBR212W	NGR1	0.038
YKL191W	DPH2	YDR150W	NUM1	0.038
YKL191W	DPH2	YDR253C	MET32	0.038
YKL191W	DPH2	YER067C-A	YER067C-A	0.038
YKL191W	DPH2	YGR077C	PEX8	0.038
YKL191W	DPH2	YGR087C	PDC6	0.038
YKL191W	DPH2	YGR151C	YGR151C	0.038
YKL191W	DPH2	YGR199W	PMT6	0.038
YKL191W	DPH2	YIL053W	RHR2	0.038
YKL191W	DPH2	YJL148W	RPA34	0.038
YKL191W	DPH2	YJR053W	BFA1	0.038
YKL191W	DPH2	YKR016W	AIM28	0.038
YKL191W	DPH2	YKR040C	YKR040C	0.038
YKL191W	DPH2	YLR218C	YLR218C	0.038
YKL191W	DPH2	YLR227C	ADY4	0.038
YKL191W	DPH2	YLR255C	YLR255C	0.038
YKL191W	DPH2	YLR432W	IMD3	0.038
YKL191W	DPH2	YMR136W	GAT2	0.038
YKL191W	DPH2	YOL087C	DUF1	0.038
YKL191W	DPH2	YOR027W	STI1	0.038
YKL191W	DPH2	YOR038C	HIR2	0.038
YKL191W	DPH2	YOR047C	STD1	0.038
YKL191W	DPH2	YOR178C	GAC1	0.038
YKL191W	DPH2	YPR120C	CLB5	0.038
YKL191W	DPH2	YAR035W	YAT1	0.037
YKL191W	DPH2	YCL016C	DCC1	0.037
YKL191W	DPH2	YCR043C	YCR043C	0.037
YKL191W	DPH2	YDR117C	TMA64	0.037
YKL191W	DPH2	YDR125C	ECM18	0.037
YKL191W	DPH2	YDR223W	CRF1	0.037
YKL191W	DPH2	YGR287C	YGR287C	0.037
YKL191W	DPH2	YHR110W	ERP5	0.037
YKL191W	DPH2	YJL016W	YJL016W	0.037
YKL191W	DPH2	YLR019W	PSR2	0.037
YKL191W	DPH2	YLR179C	YLR179C	0.037
YKL191W	DPH2	YLR194C	YLR194C	0.037
YKL191W	DPH2	YML034W	SRC1	0.037
YKL191W	DPH2	YML072C	TCB3	0.037
YKL191W	DPH2	YML131W	YML131W	0.037
YKL191W	DPH2	YOL020W	TAT2	0.037
YKL191W	DPH2	YOR010C	TIR2	0.037
YKL191W	DPH2	YOR061W	CKA2	0.037
YKL191W	DPH2	YPL001W	HAT1	0.037
YKL191W	DPH2	YBR025C	OLA1	0.036
YKL191W	DPH2	YBR230C	OM14	0.036
YKL191W	DPH2	YBR255W	MTC4	0.036
YKL191W	DPH2	YBR287W	YBR287W	0.036
YKL191W	DPH2	YCL014W	BUD3	0.036
YKL191W	DPH2	YCR034W	FEN1	0.036
YKL191W	DPH2	YDL155W	CLB3	0.036
YKL191W	DPH2	YDR512C	EMI1	0.036
YKL191W	DPH2	YDR514C	YDR514C	0.036
YKL191W	DPH2	YER101C	AST2	0.036
YKL191W	DPH2	YFL030W	AGX1	0.036
YKL191W	DPH2	YGR050C	YGR050C	0.036
YKL191W	DPH2	YGR129W	SYF2	0.036
YKL191W	DPH2	YGR131W	YGR131W	0.036
YKL191W	DPH2	YHR044C	DOG1	0.036
YKL191W	DPH2	YHR057C	CPR2	0.036
YKL191W	DPH2	YHR114W	BZZ1	0.036
YKL191W	DPH2	YHR204W	MNL1	0.036
YKL191W	DPH2	YJL110C	GZF3	0.036
YKL191W	DPH2	YJL192C	SOP4	0.036
YKL191W	DPH2	YJR070C	LIA1	0.036
YKL191W	DPH2	YJR137C	ECM17	0.036
YKL191W	DPH2	YLR154C	RNH203	0.036
YKL191W	DPH2	YLR387C	REH1	0.036
YKL191W	DPH2	YMR099C	YMR099C	0.036
YKL191W	DPH2	YNL056W	OCA2	0.036
YKL191W	DPH2	YNL096C	RPS7B	0.036
YKL191W	DPH2	YOR288C	MPD1	0.036
YKL191W	DPH2	YPL263C	KEL3	0.036
YKL191W	DPH2	YAR042W	SWH1	0.035
YKL191W	DPH2	YBR208C	DUR1,2	0.035
YKL191W	DPH2	YCR017C	CWH43	0.035
YKL191W	DPH2	YDL234C	GYP7	0.035
YKL191W	DPH2	YGR109C	CLB6	0.035
YKL191W	DPH2	YGR110W	YGR110W	0.035
YKL191W	DPH2	YHL034C	SBP1	0.035
YKL191W	DPH2	YHR033W	YHR033W	0.035
YKL191W	DPH2	YJR005W	APL1	0.035
YKL191W	DPH2	YKR042W	UTH1	0.035
YKL191W	DPH2	YKR054C	DYN1	0.035
YKL191W	DPH2	YKR070W	YKR070W	0.035
YKL191W	DPH2	YLL010C	PSR1	0.035
YKL191W	DPH2	YLR131C	ACE2	0.035
YKL191W	DPH2	YLR431C	ATG23	0.035
YKL191W	DPH2	YML017W	PSP2	0.035
YKL191W	DPH2	YML050W	AIM32	0.035
YKL191W	DPH2	YMR162C	DNF3	0.035
YKL191W	DPH2	YMR174C	PAI3	0.035
YKL191W	DPH2	YOL101C	IZH4	0.035
YKL191W	DPH2	YOR012W	YOR012W	0.035
YKL191W	DPH2	YOR384W	FRE5	0.035
YKL191W	DPH2	YPL101W	ELP4	0.035
YKL191W	DPH2	YPL181W	CTI6	0.035
YKL191W	DPH2	YPL220W	RPL1A	0.035
YKL191W	DPH2	YPR140W	TAZ1	0.035
YKL191W	DPH2	YBL085W	BOI1	0.034
YKL191W	DPH2	YBR032W	YBR032W	0.034
YKL191W	DPH2	YCL036W	GFD2	0.034
YKL191W	DPH2	YCL057W	PRD1	0.034
YKL191W	DPH2	YCR036W	RBK1	0.034
YKL191W	DPH2	YDL010W	GRX6	0.034
YKL191W	DPH2	YDL222C	FMP45	0.034
YKL191W	DPH2	YDR162C	NBP2	0.034
YKL191W	DPH2	YDR425W	SNX41	0.034
YKL191W	DPH2	YDR488C	PAC11	0.034
YKL191W	DPH2	YER179W	DMC1	0.034
YKL191W	DPH2	YGL086W	MAD1	0.034
YKL191W	DPH2	YGL118C	YGL118C	0.034
YKL191W	DPH2	YJL038C	LOH1	0.034
YKL191W	DPH2	YJL070C	YJL070C	0.034
YKL191W	DPH2	YJL197W	UBP12	0.034
YKL191W	DPH2	YKL005C	BYE1	0.034
YKL191W	DPH2	YLR247C	IRC20	0.034
YKL191W	DPH2	YLR429W	CRN1	0.034
YKL191W	DPH2	YML051W	GAL80	0.034
YKL191W	DPH2	YNL065W	AQR1	0.034
YKL191W	DPH2	YNL074C	MLF3	0.034
YKL191W	DPH2	YOL105C	WSC3	0.034
YKL191W	DPH2	YOR032C	HMS1	0.034
YKL191W	DPH2	YOR120W	GCY1	0.034
YKL191W	DPH2	YOR239W	ABP140	0.034
YKL191W	DPH2	YPL178W	CBC2	0.034
YKL191W	DPH2	YPL250C	ICY2	0.034
YKL191W	DPH2	YPR007C	REC8	0.034
YKL191W	DPH2	YCR075C	ERS1	0.033
YKL191W	DPH2	YDL210W	UGA4	0.033
YKL191W	DPH2	YDR095C	YDR095C	0.033
YKL191W	DPH2	YDR277C	MTH1	0.033
YKL191W	DPH2	YDR305C	HNT2	0.033
YKL191W	DPH2	YDR440W	DOT1	0.033
YKL191W	DPH2	YDR441C	APT2	0.033
YKL191W	DPH2	YER178W	PDA1	0.033
YKL191W	DPH2	YGR146C	YGR146C	0.033
YKL191W	DPH2	YHR080C	YHR080C	0.033
YKL191W	DPH2	YHR191C	CTF8	0.033
YKL191W	DPH2	YJL152W	YJL152W	0.033
YKL191W	DPH2	YJR015W	YJR015W	0.033
YKL191W	DPH2	YJR103W	URA8	0.033
YKL191W	DPH2	YKL217W	JEN1	0.033
YKL191W	DPH2	YLR199C	PBA1	0.033
YKL191W	DPH2	YMR018W	YMR018W	0.033
YKL191W	DPH2	YMR294W-A	YMR294W-A	0.033
YKL191W	DPH2	YNR044W	AGA1	0.033
YKL191W	DPH2	YNR075W	COS10	0.033
YKL191W	DPH2	YOR132W	VPS17	0.033
YKL191W	DPH2	YPL261C	YPL261C	0.033
YKL191W	DPH2	YPR027C	YPR027C	0.033
YKL191W	DPH2	YBL086C	YBL086C	0.032
YKL191W	DPH2	YBR172C	SMY2	0.032
YKL191W	DPH2	YDL013W	SLX5	0.032
YKL191W	DPH2	YDR317W	HIM1	0.032
YKL191W	DPH2	YDR480W	DIG2	0.032
YKL191W	DPH2	YFL034C-A	RPL22B	0.032
YKL191W	DPH2	YGL050W	TYW3	0.032
YKL191W	DPH2	YGL209W	MIG2	0.032
YKL191W	DPH2	YHL026C	YHL026C	0.032
YKL191W	DPH2	YHR209W	CRG1	0.032
YKL191W	DPH2	YKR089C	TGL4	0.032
YKL191W	DPH2	YLR180W	SAM1	0.032
YKL191W	DPH2	YLR190W	MMR1	0.032
YKL191W	DPH2	YLR416C	YLR416C	0.032
YKL191W	DPH2	YML090W	YML090W	0.032
YKL191W	DPH2	YMR219W	ESC1	0.032
YKL191W	DPH2	YNL079C	TPM1	0.032
YKL191W	DPH2	YOR131C	YOR131C	0.032
YKL191W	DPH2	YOR284W	HUA2	0.032
YKL191W	DPH2	YPL041C	YPL041C	0.032
YKL191W	DPH2	YPL087W	YDC1	0.032
YKL191W	DPH2	YCR076C	YCR076C	0.031
YKL191W	DPH2	YDL011C	YDL011C	0.031
YKL191W	DPH2	YER042W	MXR1	0.031
YKL191W	DPH2	YER085C	YER085C	0.031
YKL191W	DPH2	YFL033C	RIM15	0.031
YKL191W	DPH2	YGR007W	MUQ1	0.031
YKL191W	DPH2	YGR214W	RPS0A	0.031
YKL191W	DPH2	YGR284C	ERV29	0.031
YKL191W	DPH2	YIL050W	PCL7	0.031
YKL191W	DPH2	YIL163C	YIL163C	0.031
YKL191W	DPH2	YJL105W	SET4	0.031
YKL191W	DPH2	YLR050C	YLR050C	0.031
YKL191W	DPH2	YLR081W	GAL2	0.031
YKL191W	DPH2	YLR374C	YLR374C	0.031
YKL191W	DPH2	YLR401C	DUS3	0.031
YKL191W	DPH2	YML107C	PML39	0.031
YKL191W	DPH2	YMR147W	YMR147W	0.031
YKL191W	DPH2	YOR071C	NRT1	0.031
YKL191W	DPH2	YOR129C	AFI1	0.031
YKL191W	DPH2	YOR221C	MCT1	0.031
YKL191W	DPH2	YPL138C	SPP1	0.031
YKL191W	DPH2	YPL230W	USV1	0.031
YKL191W	DPH2	YAL067C	SEO1	0.03
YKL191W	DPH2	YBR062C	YBR062C	0.03
YKL191W	DPH2	YBR181C	RPS6B	0.03
YKL191W	DPH2	YBR295W	PCA1	0.03
YKL191W	DPH2	YDR475C	JIP4	0.03
YKL191W	DPH2	YDR522C	SPS2	0.03
YKL191W	DPH2	YER186C	YER186C	0.03
YKL191W	DPH2	YFL040W	YFL040W	0.03
YKL191W	DPH2	YFR011C	AIM13	0.03
YKL191W	DPH2	YGL249W	ZIP2	0.03
YKL191W	DPH2	YGR181W	TIM13	0.03
YKL191W	DPH2	YHR132C	ECM14	0.03
YKL191W	DPH2	YHR199C	AIM46	0.03
YKL191W	DPH2	YKL156W	RPS27A	0.03
YKL191W	DPH2	YKR061W	KTR2	0.03
YKL191W	DPH2	YLR102C	APC9	0.03
YKL191W	DPH2	YLR189C	ATG26	0.03
YKL191W	DPH2	YLR438W	CAR2	0.03
YKL191W	DPH2	YML027W	YOX1	0.03
YKL191W	DPH2	YML121W	GTR1	0.03
YKL191W	DPH2	YMR019W	STB4	0.03
YKL191W	DPH2	YMR031C	YMR031C	0.03
YKL191W	DPH2	YMR105C	PGM2	0.03
YKL191W	DPH2	YMR274C	RCE1	0.03
YKL191W	DPH2	YNL099C	OCA1	0.03
YKL191W	DPH2	YOL098C	YOL098C	0.03
YKL191W	DPH2	YOL152W	FRE7	0.03
YKL191W	DPH2	YOR050C	YOR050C	0.03
YKL191W	DPH2	YOR067C	ALG8	0.03
YKL191W	DPH2	YPL199C	YPL199C	0.03
YKL191W	DPH2	YBL098W	BNA4	0.029
YKL191W	DPH2	YBR027C	YBR027C	0.029
YKL191W	DPH2	YCR015C	YCR015C	0.029
YKL191W	DPH2	YGL054C	ERV14	0.029
YKL191W	DPH2	YGL232W	TAN1	0.029
YKL191W	DPH2	YGR173W	RBG2	0.029
YKL191W	DPH2	YHL017W	YHL017W	0.029
YKL191W	DPH2	YIL167W	SDL1	0.029
YKL191W	DPH2	YIR036C	IRC24	0.029
YKL191W	DPH2	YJL150W	YJL150W	0.029
YKL191W	DPH2	YJL161W	FMP33	0.029
YKL191W	DPH2	YJR087W	YJR087W	0.029
YKL191W	DPH2	YKR030W	GMH1	0.029
YKL191W	DPH2	YKR046C	PET10	0.029
YKL191W	DPH2	YML112W	CTK3	0.029
YKL191W	DPH2	YMR002W	MIC17	0.029
YKL191W	DPH2	YNL129W	NRK1	0.029
YKL191W	DPH2	YOR090C	PTC5	0.029
YKL191W	DPH2	YOR114W	YOR114W	0.029
YKL191W	DPH2	YOR139C	YOR139C	0.029
YKL191W	DPH2	YPL026C	SKS1	0.029
YKL191W	DPH2	YPL260W	YPL260W	0.029
YKL191W	DPH2	YPR188C	MLC2	0.029
YKL191W	DPH2	YAR050W	FLO1	0.028
YKL191W	DPH2	YBR018C	GAL7	0.028
YKL191W	DPH2	YDL001W	RMD1	0.028
YKL191W	DPH2	YDL018C	ERP3	0.028
YKL191W	DPH2	YDL089W	NUR1	0.028
YKL191W	DPH2	YDL121C	YDL121C	0.028
YKL191W	DPH2	YDL124W	YDL124W	0.028
YKL191W	DPH2	YDR257C	RKM4	0.028
YKL191W	DPH2	YDR360W	OPI7	0.028
YKL191W	DPH2	YFL010C	WWM1	0.028
YKL191W	DPH2	YGL177W	YGL177W	0.028
YKL191W	DPH2	YGR070W	ROM1	0.028
YKL191W	DPH2	YHR087W	RTC3	0.028
YKL191W	DPH2	YHR116W	COX23	0.028
YKL191W	DPH2	YHR159W	YHR159W	0.028
YKL191W	DPH2	YJL217W	REE1	0.028
YKL191W	DPH2	YJR126C	VPS70	0.028
YKL191W	DPH2	YKL149C	DBR1	0.028
YKL191W	DPH2	YKL199C	YKL199C	0.028
YKL191W	DPH2	YKL215C	YKL215C	0.028
YKL191W	DPH2	YKR049C	FMP46	0.028
YKL191W	DPH2	YLL047W	YLL047W	0.028
YKL191W	DPH2	YLL051C	FRE6	0.028
YKL191W	DPH2	YML058C-A	YML058C-A	0.028
YKL191W	DPH2	YMR178W	YMR178W	0.028
YKL191W	DPH2	YNL105W	YNL105W	0.028
YKL191W	DPH2	YNR030W	ALG12	0.028
YKL191W	DPH2	YOR041C	YOR041C	0.028
YKL191W	DPH2	YOR079C	ATX2	0.028
YKL191W	DPH2	YPL244C	HUT1	0.028
YKL191W	DPH2	YPR077C	YPR077C	0.028
YKL191W	DPH2	YPR089W	YPR089W	0.028
YKL191W	DPH2	YAL007C	ERP2	0.027
YKL191W	DPH2	YAL062W	GDH3	0.027
YKL191W	DPH2	YBR200W	BEM1	0.027
YKL191W	DPH2	YCR023C	YCR023C	0.027
YKL191W	DPH2	YCR026C	NPP1	0.027
YKL191W	DPH2	YDL096C	OPI6	0.027
YKL191W	DPH2	YDL200C	MGT1	0.027
YKL191W	DPH2	YDR321W	ASP1	0.027
YKL191W	DPH2	YDR438W	THI74	0.027
YKL191W	DPH2	YER170W	ADK2	0.027
YKL191W	DPH2	YGR084C	MRP13	0.027
YKL191W	DPH2	YGR273C	IBI1	0.027
YKL191W	DPH2	YHR048W	YHK8	0.027
YKL191W	DPH2	YIL105C	SLM1	0.027
YKL191W	DPH2	YJL193W	YJL193W	0.027
YKL191W	DPH2	YKL008C	LAC1	0.027
YKL191W	DPH2	YLL015W	BPT1	0.027
YKL191W	DPH2	YLR239C	LIP2	0.027
YKL191W	DPH2	YLR313C	SPH1	0.027
YKL191W	DPH2	YLR405W	DUS4	0.027
YKL191W	DPH2	YMR166C	YMR166C	0.027
YKL191W	DPH2	YNL140C	YNL140C	0.027
YKL191W	DPH2	YNR062C	YNR062C	0.027
YKL191W	DPH2	YOR034C	AKR2	0.027
YKL191W	DPH2	YOR052C	YOR052C	0.027
YKL191W	DPH2	YPR184W	GDB1	0.027
YKL191W	DPH2	YBR297W	MAL33	0.026
YKL191W	DPH2	YCL006C	YCL006C	0.026
YKL191W	DPH2	YCL013W	YCL013W	0.026
YKL191W	DPH2	YCR010C	ADY2	0.026
YKL191W	DPH2	YCR037C	PHO87	0.026
YKL191W	DPH2	YDL119C	YDL119C	0.026
YKL191W	DPH2	YDL188C	PPH22	0.026
YKL191W	DPH2	YDR035W	ARO3	0.026
YKL191W	DPH2	YDR083W	RRP8	0.026
YKL191W	DPH2	YDR109C	YDR109C	0.026
YKL191W	DPH2	YDR199W	YDR199W	0.026
YKL191W	DPH2	YER150W	SPI1	0.026
YKL191W	DPH2	YFL025C	BST1	0.026
YKL191W	DPH2	YGR019W	UGA1	0.026
YKL191W	DPH2	YGR226C	YGR226C	0.026
YKL191W	DPH2	YHR151C	MTC6	0.026
YKL191W	DPH2	YJL044C	GYP6	0.026
YKL191W	DPH2	YKL007W	CAP1	0.026
YKL191W	DPH2	YKL106W	AAT1	0.026
YKL191W	DPH2	YLR257W	YLR257W	0.026
YKL191W	DPH2	YML004C	GLO1	0.026
YKL191W	DPH2	YML068W	ITT1	0.026
YKL191W	DPH2	YML099C	ARG81	0.026
YKL191W	DPH2	YMR010W	YMR010W	0.026
YKL191W	DPH2	YMR096W	SNZ1	0.026
YKL191W	DPH2	YMR164C	MSS11	0.026
YKL191W	DPH2	YMR237W	BCH1	0.026
YKL191W	DPH2	YOL013W-A	YOL013W-A	0.026
YKL191W	DPH2	YOR265W	RBL2	0.026
YKL191W	DPH2	YOR268C	YOR268C	0.026
YKL191W	DPH2	YAR020C	PAU7	0.025
YKL191W	DPH2	YBL007C	SLA1	0.025
YKL191W	DPH2	YBR108W	AIM3	0.025
YKL191W	DPH2	YDL127W	PCL2	0.025
YKL191W	DPH2	YDL237W	LRC1	0.025
YKL191W	DPH2	YDR131C	YDR131C	0.025
YKL191W	DPH2	YDR258C	HSP78	0.025
YKL191W	DPH2	YDR452W	PPN1	0.025
YKL191W	DPH2	YFL028C	CAF16	0.025
YKL191W	DPH2	YIL122W	POG1	0.025
YKL191W	DPH2	YJL021C	YJL021C	0.025
YKL191W	DPH2	YJL082W	IML2	0.025
YKL191W	DPH2	YJL199C	MBB1	0.025
YKL191W	DPH2	YKL211C	TRP3	0.025
YKL191W	DPH2	YKR078W	YKR078W	0.025
YKL191W	DPH2	YKR088C	TVP38	0.025
YKL191W	DPH2	YLR039C	RIC1	0.025
YKL191W	DPH2	YLR042C	YLR042C	0.025
YKL191W	DPH2	YLR315W	NKP2	0.025
YKL191W	DPH2	YML056C	IMD4	0.025
YKL191W	DPH2	YMR116C	ASC1	0.025
YKL191W	DPH2	YMR148W	YMR148W	0.025
YKL191W	DPH2	YMR283C	RIT1	0.025
YKL191W	DPH2	YOL151W	GRE2	0.025
YKL191W	DPH2	YOR026W	BUB3	0.025
YKL191W	DPH2	YOR035C	SHE4	0.025
YKL191W	DPH2	YOR049C	RSB1	0.025
YKL191W	DPH2	YOR105W	YOR105W	0.025
YKL191W	DPH2	YOR354C	MSC6	0.025
YKL191W	DPH2	YPL036W	PMA2	0.025
YKL191W	DPH2	YPL172C	COX10	0.025
YKL191W	DPH2	YPL262W	FUM1	0.025
YKL191W	DPH2	YBL010C	YBL010C	0.024
YKL191W	DPH2	YBR064W	YBR064W	0.024
YKL191W	DPH2	YCR067C	SED4	0.024
YKL191W	DPH2	YDL094C	YDL094C	0.024
YKL191W	DPH2	YDR229W	IVY1	0.024
YKL191W	DPH2	YDR422C	SIP1	0.024
YKL191W	DPH2	YFL020C	PAU5	0.024
YKL191W	DPH2	YGL082W	YGL082W	0.024
YKL191W	DPH2	YGR015C	YGR015C	0.024
YKL191W	DPH2	YGR025W	YGR025W	0.024
YKL191W	DPH2	YGR028W	MSP1	0.024
YKL191W	DPH2	YGR107W	YGR107W	0.024
YKL191W	DPH2	YGR118W	RPS23A	0.024
YKL191W	DPH2	YGR224W	AZR1	0.024
YKL191W	DPH2	YIL010W	DOT5	0.024
YKL191W	DPH2	YJL120W	YJL120W	0.024
YKL191W	DPH2	YKL050C	YKL050C	0.024
YKL191W	DPH2	YKL070W	YKL070W	0.024
YKL191W	DPH2	YKL092C	BUD2	0.024
YKL191W	DPH2	YLR237W	THI7	0.024
YKL191W	DPH2	YLR415C	YLR415C	0.024
YKL191W	DPH2	YLR456W	YLR456W	0.024
YKL191W	DPH2	YMR006C	PLB2	0.024
YKL191W	DPH2	YMR172C-A	YMR172C-A	0.024
YKL191W	DPH2	YNL045W	YNL045W	0.024
YKL191W	DPH2	YNL119W	NCS2	0.024
YKL191W	DPH2	YOR179C	SYC1	0.024
YKL191W	DPH2	YOR183W	FYV12	0.024
YKL191W	DPH2	YOR192C	THI72	0.024
YKL191W	DPH2	YPL067C	YPL067C	0.024
YKL191W	DPH2	YPL071C	YPL071C	0.024
YKL191W	DPH2	YPL081W	RPS9A	0.024
YKL191W	DPH2	YAL019W	FUN30	0.023
YKL191W	DPH2	YBR286W	APE3	0.023
YKL191W	DPH2	YDL091C	UBX3	0.023
YKL191W	DPH2	YDR154C	YDR154C	0.023
YKL191W	DPH2	YDR171W	HSP42	0.023
YKL191W	DPH2	YDR340W	YDR340W	0.023
YKL191W	DPH2	YDR370C	YDR370C	0.023
YKL191W	DPH2	YER051W	JHD1	0.023
YKL191W	DPH2	YER140W	YER140W	0.023
YKL191W	DPH2	YFR012W	YFR012W	0.023
YKL191W	DPH2	YFR033C	QCR6	0.023
YKL191W	DPH2	YGL010W	YGL010W	0.023
YKL191W	DPH2	YGL041C	YGL041C	0.023
YKL191W	DPH2	YGL170C	SPO74	0.023
YKL191W	DPH2	YGL259W	YPS5	0.023
YKL191W	DPH2	YGR093W	DRN1	0.023
YKL191W	DPH2	YGR106C	VOA1	0.023
YKL191W	DPH2	YGR143W	SKN1	0.023
YKL191W	DPH2	YGR189C	CRH1	0.023
YKL191W	DPH2	YGR286C	BIO2	0.023
YKL191W	DPH2	YIR037W	HYR1	0.023
YKL191W	DPH2	YJL007C	YJL007C	0.023
YKL191W	DPH2	YJL106W	IME2	0.023
YKL191W	DPH2	YJR058C	APS2	0.023
YKL191W	DPH2	YJR066W	TOR1	0.023
YKL191W	DPH2	YLR014C	PPR1	0.023
YKL191W	DPH2	YLR286C	CTS1	0.023
YKL191W	DPH2	YLR309C	IMH1	0.023
YKL191W	DPH2	YLR346C	YLR346C	0.023
YKL191W	DPH2	YNL009W	IDP3	0.023
YKL191W	DPH2	YOL049W	GSH2	0.023
YKL191W	DPH2	YOL162W	YOL162W	0.023
YKL191W	DPH2	YOR188W	MSB1	0.023
YKL191W	DPH2	YOR226C	ISU2	0.023
YKL191W	DPH2	YBR048W	RPS11B	0.022
YKL191W	DPH2	YBR178W	YBR178W	0.022
YKL191W	DPH2	YBR180W	DTR1	0.022
YKL191W	DPH2	YBR220C	YBR220C	0.022
YKL191W	DPH2	YBR249C	ARO4	0.022
YKL191W	DPH2	YBR294W	SUL1	0.022
YKL191W	DPH2	YDL172C	YDL172C	0.022
YKL191W	DPH2	YDR378C	LSM6	0.022
YKL191W	DPH2	YER121W	YER121W	0.022
YKL191W	DPH2	YFL003C	MSH4	0.022
YKL191W	DPH2	YGL077C	HNM1	0.022
YKL191W	DPH2	YGR207C	YGR207C	0.022
YKL191W	DPH2	YHL046C	PAU13	0.022
YKL191W	DPH2	YHR210C	YHR210C	0.022
YKL191W	DPH2	YJL058C	BIT61	0.022
YKL191W	DPH2	YJR020W	YJR020W	0.022
YKL191W	DPH2	YJR134C	SGM1	0.022
YKL191W	DPH2	YKL085W	MDH1	0.022
YKL191W	DPH2	YKL177W	YKL177W	0.022
YKL191W	DPH2	YKR026C	GCN3	0.022
YKL191W	DPH2	YLR001C	YLR001C	0.022
YKL191W	DPH2	YLR056W	ERG3	0.022
YKL191W	DPH2	YLR146C	SPE4	0.022
YKL191W	DPH2	YLR390W	ECM19	0.022
YKL191W	DPH2	YML054C	CYB2	0.022
YKL191W	DPH2	YNL081C	SWS2	0.022
YKL191W	DPH2	YNR034W	SOL1	0.022
YKL191W	DPH2	YNR074C	AIF1	0.022
YKL191W	DPH2	YOL088C	MPD2	0.022
YKL191W	DPH2	YOL106W	YOL106W	0.022
YKL191W	DPH2	YOR163W	DDP1	0.022
YKL191W	DPH2	YOR175C	ALE1	0.022
YKL191W	DPH2	YOR382W	FIT2	0.022
YKL191W	DPH2	YPL170W	DAP1	0.022
YKL191W	DPH2	YPL258C	THI21	0.022
YKL191W	DPH2	YPR026W	ATH1	0.022
YKL191W	DPH2	YPR074C	TKL1	0.022
YKL191W	DPH2	YBL029W	YBL029W	0.021
YKL191W	DPH2	YBL069W	AST1	0.021
YKL191W	DPH2	YBR028C	YBR028C	0.021
YKL191W	DPH2	YBR075W	YBR075W	0.021
YKL191W	DPH2	YBR290W	BSD2	0.021
YKL191W	DPH2	YDL026W	YDL026W	0.021
YKL191W	DPH2	YDL050C	YDL050C	0.021
YKL191W	DPH2	YDL154W	MSH5	0.021
YKL191W	DPH2	YDR379W	RGA2	0.021
YKL191W	DPH2	YDR393W	SHE9	0.021
YKL191W	DPH2	YDR408C	ADE8	0.021
YKL191W	DPH2	YDR428C	BNA7	0.021
YKL191W	DPH2	YDR538W	PAD1	0.021
YKL191W	DPH2	YGL079W	YGL079W	0.021
YKL191W	DPH2	YGL144C	ROG1	0.021
YKL191W	DPH2	YGR111W	YGR111W	0.021
YKL191W	DPH2	YGR200C	ELP2	0.021
YKL191W	DPH2	YHL045W	YHL045W	0.021
YKL191W	DPH2	YHR078W	YHR078W	0.021
YKL191W	DPH2	YJL094C	KHA1	0.021
YKL191W	DPH2	YKL188C	PXA2	0.021
YKL191W	DPH2	YLL029W	FRA1	0.021
YKL191W	DPH2	YLR224W	YLR224W	0.021
YKL191W	DPH2	YLR254C	NDL1	0.021
YKL191W	DPH2	YLR311C	YLR311C	0.021
YKL191W	DPH2	YLR343W	GAS2	0.021
YKL191W	DPH2	YLR385C	SWC7	0.021
YKL191W	DPH2	YLR427W	MAG2	0.021
YKL191W	DPH2	YMR245W	YMR245W	0.021
YKL191W	DPH2	YMR264W	CUE1	0.021
YKL191W	DPH2	YNL127W	FAR11	0.021
YKL191W	DPH2	YNR001C	CIT1	0.021
YKL191W	DPH2	YNR067C	DSE4	0.021
YKL191W	DPH2	YOL147C	PEX11	0.021
YKL191W	DPH2	YOR066W	MSA1	0.021
YKL191W	DPH2	YOR078W	BUD21	0.021
YKL191W	DPH2	YOR213C	SAS5	0.021
YKL191W	DPH2	YOR246C	YOR246C	0.021
YKL191W	DPH2	YOR251C	TUM1	0.021
YKL191W	DPH2	YOR301W	RAX1	0.021
YKL191W	DPH2	YOR385W	YOR385W	0.021
YKL191W	DPH2	YPL120W	VPS30	0.021
YKL191W	DPH2	YPL270W	MDL2	0.021
YKL191W	DPH2	YPR015C	YPR015C	0.021
YKL191W	DPH2	YPR060C	ARO7	0.021
YKL191W	DPH2	YPR079W	MRL1	0.021
YKL191W	DPH2	YPR117W	YPR117W	0.021
YKL191W	DPH2	YBL037W	APL3	0.02
YKL191W	DPH2	YBR052C	RFS1	0.02
YKL191W	DPH2	YBR281C	DUG2	0.02
YKL191W	DPH2	YCR085W	YCR085W	0.02
YKL191W	DPH2	YCR091W	KIN82	0.02
YKL191W	DPH2	YDL199C	YDL199C	0.02
YKL191W	DPH2	YDR026C	YDR026C	0.02
YKL191W	DPH2	YDR216W	ADR1	0.02
YKL191W	DPH2	YDR261C	EXG2	0.02
YKL191W	DPH2	YER182W	FMP10	0.02
YKL191W	DPH2	YGL083W	SCY1	0.02
YKL191W	DPH2	YGL197W	MDS3	0.02
YKL191W	DPH2	YHL010C	BRP2	0.02
YKL191W	DPH2	YHR130C	YHR130C	0.02
YKL191W	DPH2	YHR157W	REC104	0.02
YKL191W	DPH2	YJL216C	YJL216C	0.02
YKL191W	DPH2	YJR010C-A	SPC1	0.02
YKL191W	DPH2	YJR083C	ACF4	0.02
YKL191W	DPH2	YJR100C	AIM25	0.02
YKL191W	DPH2	YKL127W	PGM1	0.02
YKL191W	DPH2	YKR007W	MEH1	0.02
YKL191W	DPH2	YKR010C	TOF2	0.02
YKL191W	DPH2	YKR104W	YKR104W	0.02
YKL191W	DPH2	YLR130C	ZRT2	0.02
YKL191W	DPH2	YLR228C	ECM22	0.02
YKL191W	DPH2	YLR297W	YLR297W	0.02
YKL191W	DPH2	YML100W	TSL1	0.02
YKL191W	DPH2	YMR078C	CTF18	0.02
YKL191W	DPH2	YMR137C	PSO2	0.02
YKL191W	DPH2	YMR199W	CLN1	0.02
YKL191W	DPH2	YNL024C	YNL024C	0.02
YKL191W	DPH2	YOL155C	HPF1	0.02
YKL191W	DPH2	YOR104W	PIN2	0.02
YKL191W	DPH2	YOR177C	MPC54	0.02
YKL191W	DPH2	YPL038W	MET31	0.02
YKL191W	DPH2	YPL098C	MGR2	0.02
YKL191W	DPH2	YPR054W	SMK1	0.02
YKL191W	DPH2	YAL015C	NTG1	0.019
YKL191W	DPH2	YBR047W	FMP23	0.019
YKL191W	DPH2	YBR150C	TBS1	0.019
YKL191W	DPH2	YBR292C	YBR292C	0.019
YKL191W	DPH2	YBR299W	MAL32	0.019
YKL191W	DPH2	YCL049C	YCL049C	0.019
YKL191W	DPH2	YCR073W-A	SOL2	0.019
YKL191W	DPH2	YCR090C	YCR090C	0.019
YKL191W	DPH2	YDR070C	FMP16	0.019
YKL191W	DPH2	YDR384C	ATO3	0.019
YKL191W	DPH2	YER130C	COM2	0.019
YKL191W	DPH2	YER145C	FTR1	0.019
YKL191W	DPH2	YFL035C-B	YFL035C-B	0.019
YKL191W	DPH2	YFR006W	YFR006W	0.019
YKL191W	DPH2	YGL126W	SCS3	0.019
YKL191W	DPH2	YGL230C	YGL230C	0.019
YKL191W	DPH2	YGR289C	MAL11	0.019
YKL191W	DPH2	YHR123W	EPT1	0.019
YKL191W	DPH2	YHR126C	ANS1	0.019
YKL191W	DPH2	YIL017C	VID28	0.019
YKL191W	DPH2	YIR025W	MND2	0.019
YKL191W	DPH2	YJL043W	YJL043W	0.019
YKL191W	DPH2	YJL101C	GSH1	0.019
YKL191W	DPH2	YJR099W	YUH1	0.019
YKL191W	DPH2	YLR200W	YKE2	0.019
YKL191W	DPH2	YLR294C	YLR294C	0.019
YKL191W	DPH2	YLR445W	YLR445W	0.019
YKL191W	DPH2	YML109W	ZDS2	0.019
YKL191W	DPH2	YMR029C	FAR8	0.019
YKL191W	DPH2	YMR176W	ECM5	0.019
YKL191W	DPH2	YMR251W-A	HOR7	0.019
YKL191W	DPH2	YNL027W	CRZ1	0.019
YKL191W	DPH2	YNL104C	LEU4	0.019
YKL191W	DPH2	YNL120C	YNL120C	0.019
YKL191W	DPH2	YNR013C	PHO91	0.019
YKL191W	DPH2	YNR040W	YNR040W	0.019
YKL191W	DPH2	YOL118C	YOL118C	0.019
YKL191W	DPH2	YPL039W	YPL039W	0.019
YKL191W	DPH2	YPL150W	YPL150W	0.019
YKL191W	DPH2	YPR130C	YPR130C	0.019
YKL191W	DPH2	YBL031W	SHE1	0.018
YKL191W	DPH2	YBL060W	YEL1	0.018
YKL191W	DPH2	YBL100C	YBL100C	0.018
YKL191W	DPH2	YCL002C	YCL002C	0.018
YKL191W	DPH2	YCL032W	STE50	0.018
YKL191W	DPH2	YCL042W	YCL042W	0.018
YKL191W	DPH2	YCR087C-A	LUG1	0.018
YKL191W	DPH2	YDL179W	PCL9	0.018
YKL191W	DPH2	YDR282C	YDR282C	0.018
YKL191W	DPH2	YER143W	DDI1	0.018
YKL191W	DPH2	YFL042C	YFL042C	0.018
YKL191W	DPH2	YGL226W	MTC3	0.018
YKL191W	DPH2	YGL257C	MNT2	0.018
YKL191W	DPH2	YGR282C	BGL2	0.018
YKL191W	DPH2	YHL037C	YHL037C	0.018
YKL191W	DPH2	YHL042W	YHL042W	0.018
YKL191W	DPH2	YIL042C	PKP1	0.018
YKL191W	DPH2	YIL152W	YIL152W	0.018
YKL191W	DPH2	YJL046W	AIM22	0.018
YKL191W	DPH2	YJR094C	IME1	0.018
YKL191W	DPH2	YJR107W	YJR107W	0.018
YKL191W	DPH2	YKL159C	RCN1	0.018
YKL191W	DPH2	YKL200C	YKL200C	0.018
YKL191W	DPH2	YKR048C	NAP1	0.018
YKL191W	DPH2	YML009C	MRPL39	0.018
YKL191W	DPH2	YML116W	ATR1	0.018
YKL191W	DPH2	YMR060C	SAM37	0.018
YKL191W	DPH2	YMR195W	ICY1	0.018
YKL191W	DPH2	YMR313C	TGL3	0.018
YKL191W	DPH2	YMR317W	YMR317W	0.018
YKL191W	DPH2	YNL122C	YNL122C	0.018
YKL191W	DPH2	YOL085C	YOL085C	0.018
YKL191W	DPH2	YOR031W	CRS5	0.018
YKL191W	DPH2	YOR233W	KIN4	0.018
YKL191W	DPH2	YOR248W	YOR248W	0.018
YKL191W	DPH2	YOR325W	YOR325W	0.018
YKL191W	DPH2	YPL174C	NIP100	0.018
YKL191W	DPH2	YPL180W	TCO89	0.018
YKL191W	DPH2	YPR009W	SUT2	0.018
YKL191W	DPH2	YAL022C	FUN26	0.017
YKL191W	DPH2	YBR051W	YBR051W	0.017
YKL191W	DPH2	YBR132C	AGP2	0.017
YKL191W	DPH2	YBR151W	APD1	0.017
YKL191W	DPH2	YDL020C	RPN4	0.017
YKL191W	DPH2	YDL070W	BDF2	0.017
YKL191W	DPH2	YDL186W	YDL186W	0.017
YKL191W	DPH2	YDR110W	FOB1	0.017
YKL191W	DPH2	YDR284C	DPP1	0.017
YKL191W	DPH2	YDR307W	YDR307W	0.017
YKL191W	DPH2	YDR391C	YDR391C	0.017
YKL191W	DPH2	YDR517W	GRH1	0.017
YKL191W	DPH2	YER066W	YER066W	0.017
YKL191W	DPH2	YFL034W	YFL034W	0.017
YKL191W	DPH2	YFL041W	FET5	0.017
YKL191W	DPH2	YFR024C-A	LSB3	0.017
YKL191W	DPH2	YGL179C	TOS3	0.017
YKL191W	DPH2	YGR088W	CTT1	0.017
YKL191W	DPH2	YGR126W	YGR126W	0.017
YKL191W	DPH2	YGR157W	CHO2	0.017
YKL191W	DPH2	YJL073W	JEM1	0.017
YKL191W	DPH2	YJL121C	RPE1	0.017
YKL191W	DPH2	YJL183W	MNN11	0.017
YKL191W	DPH2	YJL213W	YJL213W	0.017
YKL191W	DPH2	YKL121W	DGR2	0.017
YKL191W	DPH2	YLL041C	SDH2	0.017
YKL191W	DPH2	YLL058W	YLL058W	0.017
YKL191W	DPH2	YLL059C	YLL059C	0.017
YKL191W	DPH2	YLR211C	YLR211C	0.017
YKL191W	DPH2	YMR003W	AIM34	0.017
YKL191W	DPH2	YMR092C	AIP1	0.017
YKL191W	DPH2	YMR252C	YMR252C	0.017
YKL191W	DPH2	YNL083W	SAL1	0.017
YKL191W	DPH2	YOR091W	TMA46	0.017
YKL191W	DPH2	YOR291W	YPK9	0.017
YKL191W	DPH2	YOR349W	CIN1	0.017
YKL191W	DPH2	YPL023C	MET12	0.017
YKL191W	DPH2	YPL102C	YPL102C	0.017
YKL191W	DPH2	YPL141C	YPL141C	0.017
YKL191W	DPH2	YPR091C	YPR091C	0.017
YKL191W	DPH2	YPR160W	GPH1	0.017
YKL191W	DPH2	YBL101C	ECM21	0.016
YKL191W	DPH2	YBL106C	SRO77	0.016
YKL191W	DPH2	YBR131W	CCZ1	0.016
YKL191W	DPH2	YCL069W	VBA3	0.016
YKL191W	DPH2	YCR027C	RHB1	0.016
YKL191W	DPH2	YDL106C	PHO2	0.016
YKL191W	DPH2	YDL156W	CMR1	0.016
YKL191W	DPH2	YDL176W	YDL176W	0.016
YKL191W	DPH2	YDR130C	FIN1	0.016
YKL191W	DPH2	YDR213W	UPC2	0.016
YKL191W	DPH2	YDR540C	IRC4	0.016
YKL191W	DPH2	YFR024C	YFR024C	0.016
YKL191W	DPH2	YGR193C	PDX1	0.016
YKL191W	DPH2	YGR229C	SMI1	0.016
YKL191W	DPH2	YHR028C	DAP2	0.016
YKL191W	DPH2	YHR050W	SMF2	0.016
YKL191W	DPH2	YHR140W	YHR140W	0.016
YKL191W	DPH2	YJL162C	JJJ2	0.016
YKL191W	DPH2	YJR133W	XPT1	0.016
YKL191W	DPH2	YLR049C	YLR049C	0.016
YKL191W	DPH2	YLR093C	NYV1	0.016
YKL191W	DPH2	YML095C	RAD10	0.016
YKL191W	DPH2	YML118W	NGL3	0.016
YKL191W	DPH2	YMR107W	SPG4	0.016
YKL191W	DPH2	YMR177W	MMT1	0.016
YKL191W	DPH2	YNL080C	EOS1	0.016
YKL191W	DPH2	YNL087W	TCB2	0.016
YKL191W	DPH2	YOL036W	YOL036W	0.016
YKL191W	DPH2	YOR293W	RPS10A	0.016
YKL191W	DPH2	YOR298W	MUM3	0.016
YKL191W	DPH2	YPL033C	SRL4	0.016
YKL191W	DPH2	YPL137C	GIP3	0.016
YKL191W	DPH2	YAL068C	PAU8	0.015
YKL191W	DPH2	YBR291C	CTP1	0.015
YKL191W	DPH2	YCL001W	RER1	0.015
YKL191W	DPH2	YCL034W	LSB5	0.015
YKL191W	DPH2	YCR016W	YCR016W	0.015
YKL191W	DPH2	YCR073C	SSK22	0.015
YKL191W	DPH2	YDL065C	PEX19	0.015
YKL191W	DPH2	YDR206W	EBS1	0.015
YKL191W	DPH2	YDR262W	YDR262W	0.015
YKL191W	DPH2	YER052C	HOM3	0.015
YKL191W	DPH2	YER109C	FLO8	0.015
YKL191W	DPH2	YER144C	UBP5	0.015
YKL191W	DPH2	YFL004W	VTC2	0.015
YKL191W	DPH2	YGL125W	MET13	0.015
YKL191W	DPH2	YGL180W	ATG1	0.015
YKL191W	DPH2	YGR044C	RME1	0.015
YKL191W	DPH2	YGR164W	YGR164W	0.015
YKL191W	DPH2	YGR239C	PEX21	0.015
YKL191W	DPH2	YHR008C	SOD2	0.015
YKL191W	DPH2	YHR076W	PTC7	0.015
YKL191W	DPH2	YHR150W	PEX28	0.015
YKL191W	DPH2	YJL004C	SYS1	0.015
YKL191W	DPH2	YJL211C	YJL211C	0.015
YKL191W	DPH2	YJR052W	RAD7	0.015
YKL191W	DPH2	YKL201C	MNN4	0.015
YKL191W	DPH2	YLL063C	AYT1	0.015
YKL191W	DPH2	YLR013W	GAT3	0.015
YKL191W	DPH2	YLR128W	DCN1	0.015
YKL191W	DPH2	YLR337C	VRP1	0.015
YKL191W	DPH2	YLR460C	YLR460C	0.015
YKL191W	DPH2	YML021C	UNG1	0.015
YKL191W	DPH2	YOL141W	PPM2	0.015
YKL191W	DPH2	YOR360C	PDE2	0.015
YKL191W	DPH2	YPR051W	MAK3	0.015
YKL191W	DPH2	YPR070W	MED1	0.015
YKL191W	DPH2	YBR184W	YBR184W	0.014
YKL191W	DPH2	YCL029C	BIK1	0.014
YKL191W	DPH2	YCR063W	BUD31	0.014
YKL191W	DPH2	YCR082W	AHC2	0.014
YKL191W	DPH2	YCR092C	MSH3	0.014
YKL191W	DPH2	YDL061C	RPS29B	0.014
YKL191W	DPH2	YDR147W	EKI1	0.014
YKL191W	DPH2	YFL055W	AGP3	0.014
YKL191W	DPH2	YGL034C	YGL034C	0.014
YKL191W	DPH2	YGL161C	YIP5	0.014
YKL191W	DPH2	YGL235W	YGL235W	0.014
YKL191W	DPH2	YGR014W	MSB2	0.014
YKL191W	DPH2	YGR042W	YGR042W	0.014
YKL191W	DPH2	YJL208C	NUC1	0.014
YKL191W	DPH2	YJR054W	ERM6	0.014
YKL191W	DPH2	YJR062C	NTA1	0.014
YKL191W	DPH2	YKR090W	PXL1	0.014
YKL191W	DPH2	YLL026W	HSP104	0.014
YKL191W	DPH2	YLL046C	RNP1	0.014
YKL191W	DPH2	YLR004C	THI73	0.014
YKL191W	DPH2	YLR107W	REX3	0.014
YKL191W	DPH2	YLR325C	RPL38	0.014
YKL191W	DPH2	YLR354C	TAL1	0.014
YKL191W	DPH2	YMR052C-A	YMR052C-A	0.014
YKL191W	DPH2	YMR114C	YMR114C	0.014
YKL191W	DPH2	YMR123W	PKR1	0.014
YKL191W	DPH2	YMR132C	JLP2	0.014
YKL191W	DPH2	YMR183C	SSO2	0.014
YKL191W	DPH2	YNL144C	YNL144C	0.014
YKL191W	DPH2	YNR058W	BIO3	0.014
YKL191W	DPH2	YNR071C	YNR071C	0.014
YKL191W	DPH2	YOR269W	PAC1	0.014
YKL191W	DPH2	YOR306C	MCH5	0.014
YKL191W	DPH2	YOR343C	YOR343C	0.014
YKL191W	DPH2	YPL186C	UIP4	0.014
YKL191W	DPH2	YPR030W	CSR2	0.014
YKL191W	DPH2	YPR111W	DBF20	0.014
YKL191W	DPH2	YPR115W	GCA1	0.014
YKL191W	DPH2	YBL082C	ALG3	0.013
YKL191W	DPH2	YBL091C	MAP2	0.013
YKL191W	DPH2	YBR086C	IST2	0.013
YKL191W	DPH2	YBR119W	MUD1	0.013
YKL191W	DPH2	YBR228W	SLX1	0.013
YKL191W	DPH2	YCR098C	GIT1	0.013
YKL191W	DPH2	YDL104C	QRI7	0.013
YKL191W	DPH2	YDL146W	LDB17	0.013
YKL191W	DPH2	YDR148C	KGD2	0.013
YKL191W	DPH2	YDR242W	AMD2	0.013
YKL191W	DPH2	YDR273W	DON1	0.013
YKL191W	DPH2	YDR501W	PLM2	0.013
YKL191W	DPH2	YDR533C	HSP31	0.013
YKL191W	DPH2	YFL014W	HSP12	0.013
YKL191W	DPH2	YGL141W	HUL5	0.013
YKL191W	DPH2	YGL224C	SDT1	0.013
YKL191W	DPH2	YGR225W	AMA1	0.013
YKL191W	DPH2	YHR129C	ARP1	0.013
YKL191W	DPH2	YHR167W	THP2	0.013
YKL191W	DPH2	YIL096C	YIL096C	0.013
YKL191W	DPH2	YJL112W	MDV1	0.013
YKL191W	DPH2	YJL218W	YJL218W	0.013
YKL191W	DPH2	YJR069C	HAM1	0.013
YKL191W	DPH2	YJR150C	DAN1	0.013
YKL191W	DPH2	YKL055C	OAR1	0.013
YKL191W	DPH2	YKL137W	CMC1	0.013
YKL191W	DPH2	YLR373C	VID22	0.013
YKL191W	DPH2	YMR037C	MSN2	0.013
YKL191W	DPH2	YMR189W	GCV2	0.013
YKL191W	DPH2	YNL121C	TOM70	0.013
YKL191W	DPH2	YOL079W	YOL079W	0.013
YKL191W	DPH2	YPL022W	RAD1	0.013
YKL191W	DPH2	YPR017C	DSS4	0.013
YKL191W	DPH2	YPR020W	ATP20	0.013
YKL191W	DPH2	YPR043W	RPL43A	0.013
YKL191W	DPH2	YPR083W	MDM36	0.013
YKL191W	DPH2	YPR096C	YPR096C	0.013
YKL191W	DPH2	YPR153W	YPR153W	0.013
YKL191W	DPH2	YPR154W	PIN3	0.013
YKL191W	DPH2	YAL043C-A	YAL043C-A	0.012
YKL191W	DPH2	YBL013W	FMT1	0.012
YKL191W	DPH2	YBR006W	UGA2	0.012
YKL191W	DPH2	YBR137W	YBR137W	0.012
YKL191W	DPH2	YBR162W-A	YSY6	0.012
YKL191W	DPH2	YBR258C	SHG1	0.012
YKL191W	DPH2	YCR025C	YCR025C	0.012
YKL191W	DPH2	YCR065W	HCM1	0.012
YKL191W	DPH2	YDL083C	RPS16B	0.012
YKL191W	DPH2	YDR233C	RTN1	0.012
YKL191W	DPH2	YDR249C	YDR249C	0.012
YKL191W	DPH2	YER135C	YER135C	0.012
YKL191W	DPH2	YGL015C	YGL015C	0.012
YKL191W	DPH2	YGL261C	PAU11	0.012
YKL191W	DPH2	YGR037C	ACB1	0.012
YKL191W	DPH2	YGR138C	TPO2	0.012
YKL191W	DPH2	YGR232W	NAS6	0.012
YKL191W	DPH2	YGR236C	SPG1	0.012
YKL191W	DPH2	YHL006C	SHU1	0.012
YKL191W	DPH2	YHL008C	YHL008C	0.012
YKL191W	DPH2	YIL009C-A	EST3	0.012
YKL191W	DPH2	YJL030W	MAD2	0.012
YKL191W	DPH2	YKR033C	YKR033C	0.012
YKL191W	DPH2	YLR174W	IDP2	0.012
YKL191W	DPH2	YLR216C	CPR6	0.012
YKL191W	DPH2	YLR299W	ECM38	0.012
YKL191W	DPH2	YLR421C	RPN13	0.012
YKL191W	DPH2	YMR004W	MVP1	0.012
YKL191W	DPH2	YMR075W	RCO1	0.012
YKL191W	DPH2	YMR320W	YMR320W	0.012
YKL191W	DPH2	YNL051W	COG5	0.012
YKL191W	DPH2	YNL098C	RAS2	0.012
YKL191W	DPH2	YNL123W	NMA111	0.012
YKL191W	DPH2	YNR061C	YNR061C	0.012
YKL191W	DPH2	YOL006C	TOP1	0.012
YKL191W	DPH2	YOL013C	HRD1	0.012
YKL191W	DPH2	YOL124C	TRM11	0.012
YKL191W	DPH2	YOR327C	SNC2	0.012
YKL191W	DPH2	YOR371C	GPB1	0.012
YKL191W	DPH2	YPL159C	PET20	0.012
YKL191W	DPH2	YAL023C	PMT2	0.011
YKL191W	DPH2	YBL057C	PTH2	0.011
YKL191W	DPH2	YBL066C	SEF1	0.011
YKL191W	DPH2	YCR053W	THR4	0.011
YKL191W	DPH2	YDL081C	RPP1A	0.011
YKL191W	DPH2	YDR014W	RAD61	0.011
YKL191W	DPH2	YDR152W	GIR2	0.011
YKL191W	DPH2	YDR156W	RPA14	0.011
YKL191W	DPH2	YDR271C	YDR271C	0.011
YKL191W	DPH2	YDR375C	BCS1	0.011
YKL191W	DPH2	YDR436W	PPZ2	0.011
YKL191W	DPH2	YER098W	UBP9	0.011
YKL191W	DPH2	YER176W	ECM32	0.011
YKL191W	DPH2	YER185W	PUG1	0.011
YKL191W	DPH2	YER188W	YER188W	0.011
YKL191W	DPH2	YGL056C	SDS23	0.011
YKL191W	DPH2	YHL036W	MUP3	0.011
YKL191W	DPH2	YHR081W	LRP1	0.011
YKL191W	DPH2	YHR127W	YHR127W	0.011
YKL191W	DPH2	YJL154C	VPS35	0.011
YKL191W	DPH2	YJL163C	YJL163C	0.011
YKL191W	DPH2	YJR037W	YJR037W	0.011
YKL191W	DPH2	YKL051W	SFK1	0.011
YKL191W	DPH2	YKL197C	PEX1	0.011
YKL191W	DPH2	YKL206C	ADD66	0.011
YKL191W	DPH2	YLR120C	YPS1	0.011
YKL191W	DPH2	YMR304C-A	YMR304C-A	0.011
YKL191W	DPH2	YNL022C	YNL022C	0.011
YKL191W	DPH2	YNL050C	YNL050C	0.011
YKL191W	DPH2	YNL064C	YDJ1	0.011
YKL191W	DPH2	YNL086W	YNL086W	0.011
YKL191W	DPH2	YOL017W	ESC8	0.011
YKL191W	DPH2	YOR208W	PTP2	0.011
YKL191W	DPH2	YPL179W	PPQ1	0.011
YKL191W	DPH2	YPR171W	BSP1	0.011
YKL191W	DPH2	YBR224W	YBR224W	0.01
YKL191W	DPH2	YBR226C	YBR226C	0.01
YKL191W	DPH2	YBR273C	UBX7	0.01
YKL191W	DPH2	YCL038C	ATG22	0.01
YKL191W	DPH2	YDL128W	VCX1	0.01
YKL191W	DPH2	YDR453C	TSA2	0.01
YKL191W	DPH2	YER061C	CEM1	0.01
YKL191W	DPH2	YER078C	ICP55	0.01
YKL191W	DPH2	YER111C	SWI4	0.01
YKL191W	DPH2	YFL053W	DAK2	0.01
YKL191W	DPH2	YFR053C	HXK1	0.01
YKL191W	DPH2	YGR097W	ASK10	0.01
YKL191W	DPH2	YGR271W	SLH1	0.01
YKL191W	DPH2	YGR279C	SCW4	0.01
YKL191W	DPH2	YHR161C	YAP1801	0.01
YKL191W	DPH2	YIL155C	GUT2	0.01
YKL191W	DPH2	YJL139C	YUR1	0.01
YKL191W	DPH2	YKR015C	YKR015C	0.01
YKL191W	DPH2	YKR076W	ECM4	0.01
YKL191W	DPH2	YLR178C	TFS1	0.01
YKL191W	DPH2	YLR187W	SKG3	0.01
YKL191W	DPH2	YLR250W	SSP120	0.01
YKL191W	DPH2	YLR410W	VIP1	0.01
YKL191W	DPH2	YML008C	ERG6	0.01
YKL191W	DPH2	YMR133W	REC114	0.01
YKL191W	DPH2	YMR161W	HLJ1	0.01
YKL191W	DPH2	YNR059W	MNT4	0.01
YKL191W	DPH2	YOL028C	YAP7	0.01
YKL191W	DPH2	YOR230W	WTM1	0.01
YKL191W	DPH2	YOR304C-A	YOR304C-A	0.01
YKL191W	DPH2	YPR134W	MSS18	0.01
YKL191W	DPH2	YPR149W	NCE102	0.01
YKL191W	DPH2	YAR023C	YAR023C	0.009
YKL191W	DPH2	YAR047C	YAR047C	0.009
YKL191W	DPH2	YDL048C	STP4	0.009
YKL191W	DPH2	YDL077C	VAM6	0.009
YKL191W	DPH2	YDL117W	CYK3	0.009
YKL191W	DPH2	YDR058C	TGL2	0.009
YKL191W	DPH2	YDR059C	UBC5	0.009
YKL191W	DPH2	YDR063W	AIM7	0.009
YKL191W	DPH2	YDR293C	SSD1	0.009
YKL191W	DPH2	YDR304C	CPR5	0.009
YKL191W	DPH2	YDR363W-A	SEM1	0.009
YKL191W	DPH2	YFL019C	YFL019C	0.009
YKL191W	DPH2	YGL090W	LIF1	0.009
YKL191W	DPH2	YGR096W	TPC1	0.009
YKL191W	DPH2	YGR121C	MEP1	0.009
YKL191W	DPH2	YHL014C	YLF2	0.009
YKL191W	DPH2	YIL153W	RRD1	0.009
YKL191W	DPH2	YIR029W	DAL2	0.009
YKL191W	DPH2	YJL013C	MAD3	0.009
YKL191W	DPH2	YKL131W	YKL131W	0.009
YKL191W	DPH2	YKR020W	VPS51	0.009
YKL191W	DPH2	YLR164W	YLR164W	0.009
YKL191W	DPH2	YLR351C	NIT3	0.009
YKL191W	DPH2	YML055W	SPC2	0.009
YKL191W	DPH2	YMR030W	RSF1	0.009
YKL191W	DPH2	YMR157C	AIM36	0.009
YKL191W	DPH2	YMR209C	YMR209C	0.009
YKL191W	DPH2	YMR226C	TMA29	0.009
YKL191W	DPH2	YMR307W	GAS1	0.009
YKL191W	DPH2	YNL067W	RPL9B	0.009
YKL191W	DPH2	YOL035C	YOL035C	0.009
YKL191W	DPH2	YOL059W	GPD2	0.009
YKL191W	DPH2	YOR156C	NFI1	0.009
YKL191W	DPH2	YOR270C	VPH1	0.009
YKL191W	DPH2	YPL166W	ATG29	0.009
YKL191W	DPH2	YBR111C	YSA1	0.008
YKL191W	DPH2	YBR199W	KTR4	0.008
YKL191W	DPH2	YCL010C	SGF29	0.008
YKL191W	DPH2	YCL012W	YCL012W	0.008
YKL191W	DPH2	YCR095C	OCA4	0.008
YKL191W	DPH2	YDR122W	KIN1	0.008
YKL191W	DPH2	YDR159W	SAC3	0.008
YKL191W	DPH2	YDR411C	DFM1	0.008
YKL191W	DPH2	YDR534C	FIT1	0.008
YKL191W	DPH2	YER063W	THO1	0.008
YKL191W	DPH2	YFR022W	ROG3	0.008
YKL191W	DPH2	YFR023W	PES4	0.008
YKL191W	DPH2	YGL006W	PMC1	0.008
YKL191W	DPH2	YGL051W	MST27	0.008
YKL191W	DPH2	YHR137W	ARO9	0.008
YKL191W	DPH2	YIL141W	YIL141W	0.008
YKL191W	DPH2	YIR038C	GTT1	0.008
YKL191W	DPH2	YJL053W	PEP8	0.008
YKL191W	DPH2	YJR050W	ISY1	0.008
YKL191W	DPH2	YML060W	OGG1	0.008
YKL191W	DPH2	YML100W-A	YML100W-A	0.008
YKL191W	DPH2	YMR042W	ARG80	0.008
YKL191W	DPH2	YMR065W	KAR5	0.008
YKL191W	DPH2	YNL041C	COG6	0.008
YKL191W	DPH2	YNR073C	YNR073C	0.008
YKL191W	DPH2	YOL031C	SIL1	0.008
YKL191W	DPH2	YOL048C	YOL048C	0.008
YKL191W	DPH2	YOL137W	BSC6	0.008
YKL191W	DPH2	YOR002W	ALG6	0.008
YKL191W	DPH2	YOR093C	CMR2	0.008
YKL191W	DPH2	YOR138C	RUP1	0.008
YKL191W	DPH2	YOR365C	YOR365C	0.008
YKL191W	DPH2	YPL014W	YPL014W	0.008
YKL191W	DPH2	YPL103C	FMP30	0.008
YKL191W	DPH2	YPR078C	YPR078C	0.008
YKL191W	DPH2	YPR135W	CTF4	0.008
YKL191W	DPH2	YBL083C	YBL083C	0.007
YKL191W	DPH2	YBR270C	BIT2	0.007
YKL191W	DPH2	YDL182W	LYS20	0.007
YKL191W	DPH2	YER131W	RPS26B	0.007
YKL191W	DPH2	YFL049W	SWP82	0.007
YKL191W	DPH2	YGL117W	YGL117W	0.007
YKL191W	DPH2	YGL165C	YGL165C	0.007
YKL191W	DPH2	YGR031W	YGR031W	0.007
YKL191W	DPH2	YGR205W	YGR205W	0.007
YKL191W	DPH2	YHL020C	OPI1	0.007
YKL191W	DPH2	YHR125W	YHR125W	0.007
YKL191W	DPH2	YIL002C	INP51	0.007
YKL191W	DPH2	YIL065C	FIS1	0.007
YKL191W	DPH2	YIL066C	RNR3	0.007
YKL191W	DPH2	YJL135W	YJL135W	0.007
YKL191W	DPH2	YJL206C-A	YJL206C-A	0.007
YKL191W	DPH2	YLR032W	RAD5	0.007
YKL191W	DPH2	YLR282C	YLR282C	0.007
YKL191W	DPH2	YLR287C	YLR287C	0.007
YKL191W	DPH2	YLR307W	CDA1	0.007
YKL191W	DPH2	YML074C	FPR3	0.007
YKL191W	DPH2	YMR173W-A	YMR173W-A	0.007
YKL191W	DPH2	YNL029C	KTR5	0.007
YKL191W	DPH2	YNL094W	APP1	0.007
YKL191W	DPH2	YNL095C	YNL095C	0.007
YKL191W	DPH2	YOL060C	MAM3	0.007
YKL191W	DPH2	YOR009W	TIR4	0.007
YKL191W	DPH2	YOR279C	RFM1	0.007
YKL191W	DPH2	YOR377W	ATF1	0.007
YKL191W	DPH2	YPL106C	SSE1	0.007
YKL191W	DPH2	YPL136W	YPL136W	0.007
YKL191W	DPH2	YBR015C	MNN2	0.006
YKL191W	DPH2	YBR100W	YBR100W	0.006
YKL191W	DPH2	YBR149W	ARA1	0.006
YKL191W	DPH2	YBR214W	SDS24	0.006
YKL191W	DPH2	YBR223C	TDP1	0.006
YKL191W	DPH2	YBR238C	YBR238C	0.006
YKL191W	DPH2	YBR271W	YBR271W	0.006
YKL191W	DPH2	YCR022C	YCR022C	0.006
YKL191W	DPH2	YDR046C	BAP3	0.006
YKL191W	DPH2	YDR313C	PIB1	0.006
YKL191W	DPH2	YDR511W	ACN9	0.006
YKL191W	DPH2	YER134C	YER134C	0.006
YKL191W	DPH2	YER137C	YER137C	0.006
YKL191W	DPH2	YER174C	GRX4	0.006
YKL191W	DPH2	YGL046W	YGL046W	0.006
YKL191W	DPH2	YGL228W	SHE10	0.006
YKL191W	DPH2	YGL252C	RTG2	0.006
YKL191W	DPH2	YGL254W	FZF1	0.006
YKL191W	DPH2	YGR004W	PEX31	0.006
YKL191W	DPH2	YGR017W	YGR017W	0.006
YKL191W	DPH2	YGR043C	NQM1	0.006
YKL191W	DPH2	YGR290W	YGR290W	0.006
YKL191W	DPH2	YJL089W	SIP4	0.006
YKL191W	DPH2	YJL116C	NCA3	0.006
YKL191W	DPH2	YKL098W	MTC2	0.006
YKL191W	DPH2	YKL103C	LAP4	0.006
YKL191W	DPH2	YKR034W	DAL80	0.006
YKL191W	DPH2	YLR012C	YLR012C	0.006
YKL191W	DPH2	YLR112W	YLR112W	0.006
YKL191W	DPH2	YMR058W	FET3	0.006
YKL191W	DPH2	YNR033W	ABZ1	0.006
YKL191W	DPH2	YNR066C	YNR066C	0.006
YKL191W	DPH2	YOR003W	YSP3	0.006
YKL191W	DPH2	YOR058C	ASE1	0.006
YKL191W	DPH2	YOR064C	YNG1	0.006
YKL191W	DPH2	YOR087W	YVC1	0.006
YKL191W	DPH2	YOR100C	CRC1	0.006
YKL191W	DPH2	YOR144C	ELG1	0.006
YKL191W	DPH2	YOR374W	ALD4	0.006
YKL191W	DPH2	YOR381W	FRE3	0.006
YKL191W	DPH2	YPL182C	YPL182C	0.006
YKL191W	DPH2	YPR001W	CIT3	0.006
YKL191W	DPH2	YPR038W	IRC16	0.006
YKL191W	DPH2	YPR039W	YPR039W	0.006
YKL191W	DPH2	YPR152C	URN1	0.006
YKL191W	DPH2	YPR164W	MMS1	0.006
YKL191W	DPH2	YPR194C	OPT2	0.006
YKL191W	DPH2	YBL103C	RTG3	0.005
YKL191W	DPH2	YBL104C	YBL104C	0.005
YKL191W	DPH2	YBR063C	YBR063C	0.005
YKL191W	DPH2	YBR240C	THI2	0.005
YKL191W	DPH2	YBR244W	GPX2	0.005
YKL191W	DPH2	YCL039W	GID7	0.005
YKL191W	DPH2	YDL093W	PMT5	0.005
YKL191W	DPH2	YDL133W	YDL133W	0.005
YKL191W	DPH2	YDR269C	YDR269C	0.005
YKL191W	DPH2	YDR287W	INM2	0.005
YKL191W	DPH2	YDR458C	HEH2	0.005
YKL191W	DPH2	YDR492W	IZH1	0.005
YKL191W	DPH2	YER065C	ICL1	0.005
YKL191W	DPH2	YER129W	SAK1	0.005
YKL191W	DPH2	YGL131C	SNT2	0.005
YKL191W	DPH2	YGR021W	YGR021W	0.005
YKL191W	DPH2	YGR100W	MDR1	0.005
YKL191W	DPH2	YGR209C	TRX2	0.005
YKL191W	DPH2	YHL039W	YHL039W	0.005
YKL191W	DPH2	YHR022C	YHR022C	0.005
YKL191W	DPH2	YIL168W	YIL168W	0.005
YKL191W	DPH2	YJL212C	OPT1	0.005
YKL191W	DPH2	YJR082C	EAF6	0.005
YKL191W	DPH2	YJR110W	YMR1	0.005
YKL191W	DPH2	YKL010C	UFD4	0.005
YKL191W	DPH2	YLR398C	SKI2	0.005
YKL191W	DPH2	YML120C	NDI1	0.005
YKL191W	DPH2	YMR068W	AVO2	0.005
YKL191W	DPH2	YMR122C	YMR122C	0.005
YKL191W	DPH2	YMR222C	FSH2	0.005
YKL191W	DPH2	YMR316C-A	YMR316C-A	0.005
YKL191W	DPH2	YNL130C	CPT1	0.005
YKL191W	DPH2	YOL089C	HAL9	0.005
YKL191W	DPH2	YOL090W	MSH2	0.005
YKL191W	DPH2	YOL110W	SHR5	0.005
YKL191W	DPH2	YOL160W	YOL160W	0.005
YKL191W	DPH2	YOR043W	WHI2	0.005
YKL191W	DPH2	YOR152C	YOR152C	0.005
YKL191W	DPH2	YOR170W	YOR170W	0.005
YKL191W	DPH2	YOR186W	YOR186W	0.005
YKL191W	DPH2	YOR280C	FSH3	0.005
YKL191W	DPH2	YOR363C	PIP2	0.005
YKL191W	DPH2	YPL053C	KTR6	0.005
YKL191W	DPH2	YPL203W	TPK2	0.005
YKL191W	DPH2	YBL052C	SAS3	0.004
YKL191W	DPH2	YBL063W	KIP1	0.004
YKL191W	DPH2	YBR036C	CSG2	0.004
YKL191W	DPH2	YBR041W	FAT1	0.004
YKL191W	DPH2	YCL063W	VAC17	0.004
YKL191W	DPH2	YCR021C	HSP30	0.004
YKL191W	DPH2	YCR033W	SNT1	0.004
YKL191W	DPH2	YCR083W	TRX3	0.004
YKL191W	DPH2	YDL110C	TMA17	0.004
YKL191W	DPH2	YDR260C	SWM1	0.004
YKL191W	DPH2	YDR506C	YDR506C	0.004
YKL191W	DPH2	YFR010W	UBP6	0.004
YKL191W	DPH2	YGL057C	YGL057C	0.004
YKL191W	DPH2	YGL067W	NPY1	0.004
YKL191W	DPH2	YGL181W	GTS1	0.004
YKL191W	DPH2	YGR254W	ENO1	0.004
YKL191W	DPH2	YGR259C	YGR259C	0.004
YKL191W	DPH2	YGR261C	APL6	0.004
YKL191W	DPH2	YHR039C	MSC7	0.004
YKL191W	DPH2	YIL038C	NOT3	0.004
YKL191W	DPH2	YIL067C	YIL067C	0.004
YKL191W	DPH2	YJL065C	DLS1	0.004
YKL191W	DPH2	YJR120W	YJR120W	0.004
YKL191W	DPH2	YJR129C	YJR129C	0.004
YKL191W	DPH2	YKL034W	TUL1	0.004
YKL191W	DPH2	YKL174C	TPO5	0.004
YKL191W	DPH2	YKL220C	FRE2	0.004
YKL191W	DPH2	YLR151C	PCD1	0.004
YKL191W	DPH2	YLR168C	UPS2	0.004
YKL191W	DPH2	YML035C	AMD1	0.004
YKL191W	DPH2	YML124C	TUB3	0.004
YKL191W	DPH2	YMR118C	YMR118C	0.004
YKL191W	DPH2	YOL004W	SIN3	0.004
YKL191W	DPH2	YOL109W	ZEO1	0.004
YKL191W	DPH2	YOL111C	MDY2	0.004
YKL191W	DPH2	YOR028C	CIN5	0.004
YKL191W	DPH2	YOR238W	YOR238W	0.004
YKL191W	DPH2	YOR322C	LDB19	0.004
YKL191W	DPH2	YOR386W	PHR1	0.004
YKL191W	DPH2	YPL099C	AIM43	0.004
YKL191W	DPH2	YPL208W	RKM1	0.004
YKL191W	DPH2	YPL224C	MMT2	0.004
YKL191W	DPH2	YBR134W	YBR134W	0.003
YKL191W	DPH2	YDL231C	BRE4	0.003
YKL191W	DPH2	YDR018C	YDR018C	0.003
YKL191W	DPH2	YDR085C	AFR1	0.003
YKL191W	DPH2	YDR123C	INO2	0.003
YKL191W	DPH2	YDR215C	YDR215C	0.003
YKL191W	DPH2	YDR270W	CCC2	0.003
YKL191W	DPH2	YFR018C	YFR018C	0.003
YKL191W	DPH2	YFR044C	DUG1	0.003
YKL191W	DPH2	YGL045W	RIM8	0.003
YKL191W	DPH2	YGL139W	FLC3	0.003
YKL191W	DPH2	YGL140C	YGL140C	0.003
YKL191W	DPH2	YGL153W	PEX14	0.003
YKL191W	DPH2	YGL216W	KIP3	0.003
YKL191W	DPH2	YGR008C	STF2	0.003
YKL191W	DPH2	YHR171W	ATG7	0.003
YKL191W	DPH2	YIL079C	AIR1	0.003
YKL191W	DPH2	YJL017W	YJL017W	0.003
YKL191W	DPH2	YKL178C	STE3	0.003
YKL191W	DPH2	YKR032W	YKR032W	0.003
YKL191W	DPH2	YKR053C	YSR3	0.003
YKL191W	DPH2	YLR030W	YLR030W	0.003
YKL191W	DPH2	YLR170C	APS1	0.003
YKL191W	DPH2	YML066C	SMA2	0.003
YKL191W	DPH2	YNL116W	DMA2	0.003
YKL191W	DPH2	YNL146W	YNL146W	0.003
YKL191W	DPH2	YNL156C	NSG2	0.003
YKL191W	DPH2	YOR134W	BAG7	0.003
YKL191W	DPH2	YOR166C	SWT1	0.003
YKL191W	DPH2	YPR155C	NCA2	0.003
YKL191W	DPH2	YBL054W	TOD6	0.002
YKL191W	DPH2	YBR046C	ZTA1	0.002
YKL191W	DPH2	YBR250W	SPO23	0.002
YKL191W	DPH2	YBR278W	DPB3	0.002
YKL191W	DPH2	YDL142C	CRD1	0.002
YKL191W	DPH2	YDL184C	RPL41A	0.002
YKL191W	DPH2	YDL219W	DTD1	0.002
YKL191W	DPH2	YDL230W	PTP1	0.002
YKL191W	DPH2	YDR127W	ARO1	0.002
YKL191W	DPH2	YDR149C	YDR149C	0.002
YKL191W	DPH2	YDR244W	PEX5	0.002
YKL191W	DPH2	YDR400W	URH1	0.002
YKL191W	DPH2	YDR491C	YDR491C	0.002
YKL191W	DPH2	YGL148W	ARO2	0.002
YKL191W	DPH2	YGL157W	YGL157W	0.002
YKL191W	DPH2	YGL173C	KEM1	0.002
YKL191W	DPH2	YGR256W	GND2	0.002
YKL191W	DPH2	YHR163W	SOL3	0.002
YKL191W	DPH2	YIL036W	CST6	0.002
YKL191W	DPH2	YIL090W	ICE2	0.002
YKL191W	DPH2	YIL092W	YIL092W	0.002
YKL191W	DPH2	YIL136W	OM45	0.002
YKL191W	DPH2	YJR075W	HOC1	0.002
YKL191W	DPH2	YJR128W	YJR128W	0.002
[truncated: 1,885 more rows]

## Sheet: DPH5
ORF1	Gene1	ORF2	Gene2	Correlation
YLR172C	DPH5	YIL103W	DPH1	0.275
YLR172C	DPH5	YLR143W	YLR143W	0.273
YLR172C	DPH5	YKL191W	DPH2	0.234
YLR172C	DPH5	YBR246W	YBR246W	0.222
YLR172C	DPH5	YJR097W	DPH4/JJJ3	0.174
YLR172C	DPH5	YKR095W	MLP1	0.165
YLR172C	DPH5	YNL001W	DOM34	0.155
YLR172C	DPH5	YOL114C	YOL114C	0.154
YLR172C	DPH5	YER032W	FIR1	0.147
YLR172C	DPH5	YKL137W	CMC1	0.146
YLR172C	DPH5	YER112W_damp	LSM4_damp	0.138
YLR172C	DPH5	YKR084C	HBS1	0.138
YLR172C	DPH5	YKR024C	DBP7	0.137
YLR172C	DPH5	YMR019W	STB4	0.137
YLR172C	DPH5	YLR046C	YLR046C	0.136
YLR172C	DPH5	YIL033C	BCY1	0.133
YLR172C	DPH5	YGR178C	PBP1	0.128
YLR172C	DPH5	YJL117W	PHO86	0.128
YLR172C	DPH5	YMR006C	PLB2	0.127
YLR172C	DPH5	YDR395W	SXM1	0.126
YLR172C	DPH5	YKL056C	TMA19	0.126
YLR172C	DPH5	YNR048W	YNR048W	0.126
YLR172C	DPH5	YOR243C	PUS7	0.126
YLR172C	DPH5	YDL150W_damp	RPC53_damp	0.125
YLR172C	DPH5	YIR007W	YIR007W	0.125
YLR172C	DPH5	YDR069C_damp	DOA4_damp	0.123
YLR172C	DPH5	YBR297W	MAL33	0.121
YLR172C	DPH5	YDR457W	TOM1	0.121
YLR172C	DPH5	YPR095C	SYT1	0.121
YLR172C	DPH5	YDR507C	GIN4	0.119
YLR172C	DPH5	YHR121W	LSM12	0.118
YLR172C	DPH5	YHL034C	SBP1	0.117
YLR172C	DPH5	YHR167W	THP2	0.117
YLR172C	DPH5	YGR123C	PPT1	0.116
YLR172C	DPH5	YPL261C	YPL261C	0.116
YLR172C	DPH5	YDR216W	ADR1	0.114
YLR172C	DPH5	YLR453C	RIF2	0.114
YLR172C	DPH5	YBR199W	KTR4	0.113
YLR172C	DPH5	YCR077C	PAT1	0.111
YLR172C	DPH5	YJL158C	CIS3	0.111
YLR172C	DPH5	YMR215W	GAS3	0.111
YLR172C	DPH5	YBR257W_damp	POP4_damp	0.11
YLR172C	DPH5	YDR508C	GNP1	0.11
YLR172C	DPH5	YOR213C	SAS5	0.11
YLR172C	DPH5	YBR111W-A	SUS1	0.109
YLR172C	DPH5	YGL089C	MF(ALPHA)2	0.109
YLR172C	DPH5	YER158C	YER158C	0.108
YLR172C	DPH5	YBR116C	YBR116C	0.107
YLR172C	DPH5	YEL018W	EAF5	0.106
YLR172C	DPH5	YMR166C	YMR166C	0.106
YLR172C	DPH5	YPR153W	YPR153W	0.106
YLR172C	DPH5	YDR099W	BMH2	0.105
YLR172C	DPH5	YDR363W-A	SEM1	0.105
YLR172C	DPH5	YIL149C	MLP2	0.105
YLR172C	DPH5	YPL057C	SUR1	0.105
YLR172C	DPH5	YDR179C	CSN9	0.103
YLR172C	DPH5	YDR199W	YDR199W	0.102
YLR172C	DPH5	YDR509W	YDR509W	0.101
YLR172C	DPH5	YLR438C-A_damp	LSM3_damp	0.1
YLR172C	DPH5	YGL085W	YGL085W	0.099
YLR172C	DPH5	YNL146W	YNL146W	0.099
YLR172C	DPH5	YBR025C	OLA1	0.098
YLR172C	DPH5	YDR198C	RKM2	0.098
YLR172C	DPH5	YDR298C	ATP5	0.098
YLR172C	DPH5	YDR321W	ASP1	0.098
YLR172C	DPH5	YIR033W	MGA2	0.098
YLR172C	DPH5	YJR033C	RAV1	0.098
YLR172C	DPH5	YKR019C	IRS4	0.098
YLR172C	DPH5	YLR250W	SSP120	0.098
YLR172C	DPH5	YLR451W	LEU3	0.098
YLR172C	DPH5	YPL228W_tsq420	cet1-15	0.098
YLR172C	DPH5	YBL028C	YBL028C	0.097
YLR172C	DPH5	YBR082C	UBC4	0.096
YLR172C	DPH5	YBR150C	TBS1	0.096
YLR172C	DPH5	YDR368W	YPR1	0.096
YLR172C	DPH5	YKR008W_tsq498	rsc4-2	0.096
YLR172C	DPH5	YKR086W_tsq644	prp16-ts	0.096
YLR172C	DPH5	YMR085W	YMR085W	0.096
YLR172C	DPH5	YBR260C	RGD1	0.095
YLR172C	DPH5	YCR076C	YCR076C	0.095
YLR172C	DPH5	YLR412W	BER1	0.095
YLR172C	DPH5	YNR042W	YNR042W	0.095
YLR172C	DPH5	YLR095C	IOC2	0.094
YLR172C	DPH5	YOR242C	SSP2	0.094
YLR172C	DPH5	YPL066W	YPL066W	0.094
YLR172C	DPH5	YDR233C	RTN1	0.093
YLR172C	DPH5	YNL116W	DMA2	0.093
YLR172C	DPH5	YGR130C	YGR130C	0.092
YLR172C	DPH5	YJR035W	RAD26	0.092
YLR172C	DPH5	YJR117W	STE24	0.092
YLR172C	DPH5	YMR042W	ARG80	0.092
YLR172C	DPH5	YKL106W	AAT1	0.091
YLR172C	DPH5	YBR075W	YBR075W	0.09
YLR172C	DPH5	YJL176C	SWI3	0.09
YLR172C	DPH5	YNL219C	ALG9	0.09
YLR172C	DPH5	YFR004W_tsq534	rpn11-14	0.089
YLR172C	DPH5	YGL014W	PUF4	0.089
YLR172C	DPH5	YGL258W	VEL1	0.089
YLR172C	DPH5	YKL031W	YKL031W	0.089
YLR172C	DPH5	YKR093W	PTR2	0.089
YLR172C	DPH5	YGR249W	MGA1	0.088
YLR172C	DPH5	YLR357W_damp	RSC2_damp	0.088
YLR172C	DPH5	YBR222C	PCS60	0.087
YLR172C	DPH5	YDR220C	YDR220C	0.087
YLR172C	DPH5	YDR265W	PEX10	0.087
YLR172C	DPH5	YER042W	MXR1	0.087
YLR172C	DPH5	YHR039C-A	VMA10	0.087
YLR172C	DPH5	YLR189C	ATG26	0.087
YLR172C	DPH5	YMR173W-A	YMR173W-A	0.087
YLR172C	DPH5	YPL258C	THI21	0.087
YLR172C	DPH5	YPR053C	YPR053C	0.087
YLR172C	DPH5	YBL034C_tsq274	stu1-5	0.086
YLR172C	DPH5	YDR223W	CRF1	0.086
YLR172C	DPH5	YER066C-A	YER066C-A	0.086
YLR172C	DPH5	YGL242C	YGL242C	0.086
YLR172C	DPH5	YML051W	GAL80	0.086
YLR172C	DPH5	YNL289W	PCL1	0.086
YLR172C	DPH5	YNR058W	BIO3	0.086
YLR172C	DPH5	YPL108W	YPL108W	0.086
YLR172C	DPH5	YBR230C	OM14	0.085
YLR172C	DPH5	YER164W	CHD1	0.085
YLR172C	DPH5	YKL007W	CAP1	0.085
YLR172C	DPH5	YLR252W	YLR252W	0.085
YLR172C	DPH5	YOL009C	MDM12	0.085
YLR172C	DPH5	YDL028C_tsq169	mps1-417	0.084
YLR172C	DPH5	YJR146W	YJR146W	0.084
YLR172C	DPH5	YMR316W	DIA1	0.084
YLR172C	DPH5	YOR116C_tsq831	rpo31-698	0.084
YLR172C	DPH5	YPR184W	GDB1	0.084
YLR172C	DPH5	YAL021C_damp	CCR4_damp	0.083
YLR172C	DPH5	YBR229C	ROT2	0.083
YLR172C	DPH5	YBR238C	YBR238C	0.083
YLR172C	DPH5	YBR255W	MTC4	0.083
YLR172C	DPH5	YER101C	AST2	0.083
YLR172C	DPH5	YHR182W	YHR182W	0.083
YLR172C	DPH5	YMR254C	YMR254C	0.083
YLR172C	DPH5	YNL233W	BNI4	0.083
YLR172C	DPH5	YHL037C	YHL037C	0.082
YLR172C	DPH5	YJL124C	LSM1	0.082
YLR172C	DPH5	YKL066W	YKL066W	0.082
YLR172C	DPH5	YML099C	ARG81	0.082
YLR172C	DPH5	YOR211C	MGM1	0.082
YLR172C	DPH5	YDR181C	SAS4	0.081
YLR172C	DPH5	YEL051W	VMA8	0.081
YLR172C	DPH5	YGR090W_damp	UTP22_damp	0.081
YLR172C	DPH5	YMR109W	MYO5	0.081
YLR172C	DPH5	YMR163C	INP2	0.081
YLR172C	DPH5	YNR047W	FPK1	0.081
YLR172C	DPH5	YNR063W	YNR063W	0.081
YLR172C	DPH5	YNR073C	YNR073C	0.081
YLR172C	DPH5	YDL127W	PCL2	0.08
YLR172C	DPH5	YDR018C	YDR018C	0.08
YLR172C	DPH5	YHR152W	SPO12	0.08
YLR172C	DPH5	YJL205C	NCE101	0.08
YLR172C	DPH5	YOL045W	PSK2	0.08
YLR172C	DPH5	YOL085C	YOL085C	0.08
YLR172C	DPH5	YDL155W	CLB3	0.079
YLR172C	DPH5	YDR422C	SIP1	0.079
YLR172C	DPH5	YGL018C_damp	JAC1_damp	0.079
YLR172C	DPH5	YIR002C	MPH1	0.079
YLR172C	DPH5	YLR251W	SYM1	0.079
YLR172C	DPH5	YOR036W	PEP12	0.079
YLR172C	DPH5	YDL223C	HBT1	0.078
YLR172C	DPH5	YDR358W	GGA1	0.078
YLR172C	DPH5	YDR539W	YDR539W	0.078
YLR172C	DPH5	YIL164C	NIT1	0.078
YLR172C	DPH5	YKL110C	KTI12	0.078
YLR172C	DPH5	YLR153C_damp	ACS2_damp	0.078
YLR172C	DPH5	YLR368W	MDM30	0.078
YLR172C	DPH5	YMR133W	REC114	0.078
YLR172C	DPH5	YMR204C	INP1	0.078
YLR172C	DPH5	YMR222C	FSH2	0.078
YLR172C	DPH5	YOR315W	SFG1	0.078
YLR172C	DPH5	YPL212C	PUS1	0.078
YLR172C	DPH5	YBR244W	GPX2	0.077
YLR172C	DPH5	YDR154C	YDR154C	0.077
YLR172C	DPH5	YJR120W	YJR120W	0.077
YLR172C	DPH5	YKL098W	MTC2	0.077
YLR172C	DPH5	YLR423C	ATG17	0.077
YLR172C	DPH5	YLR436C	ECM30	0.077
YLR172C	DPH5	YMR075W	RCO1	0.077
YLR172C	DPH5	YMR114C	YMR114C	0.077
YLR172C	DPH5	YNL008C	ASI3	0.077
YLR172C	DPH5	YNL291C	MID1	0.077
YLR172C	DPH5	YOR099W	KTR1	0.077
YLR172C	DPH5	YPL179W	PPQ1	0.077
YLR172C	DPH5	YPR022C	YPR022C	0.077
YLR172C	DPH5	YBL079W	NUP170	0.076
YLR172C	DPH5	YBR065C	ECM2	0.076
YLR172C	DPH5	YDL007W_damp	RPT2_damp	0.076
YLR172C	DPH5	YER105C	NUP157	0.076
YLR172C	DPH5	YKL023W	YKL023W	0.076
YLR172C	DPH5	YLR334C	YLR334C	0.076
YLR172C	DPH5	YOR259C_tsq260	rpt4-150	0.076
YLR172C	DPH5	YBR138C	YBR138C	0.075
YLR172C	DPH5	YBR224W	YBR224W	0.075
YLR172C	DPH5	YBR259W	YBR259W	0.075
YLR172C	DPH5	YDR010C	YDR010C	0.075
YLR172C	DPH5	YER081W	SER3	0.075
YLR172C	DPH5	YHR127W	YHR127W	0.075
YLR172C	DPH5	YJL112W	MDV1	0.075
YLR172C	DPH5	YJR021C	REC107	0.075
YLR172C	DPH5	YLL012W	YEH1	0.075
YLR172C	DPH5	YMR176W	ECM5	0.075
YLR172C	DPH5	YBR067C	TIP1	0.074
YLR172C	DPH5	YBR161W	CSH1	0.074
YLR172C	DPH5	YDL169C	UGX2	0.074
YLR172C	DPH5	YFL006W	YFL006W	0.074
YLR172C	DPH5	YGL176C	YGL176C	0.074
YLR172C	DPH5	YJL068C	YJL068C	0.074
YLR172C	DPH5	YKL205W	LOS1	0.074
YLR172C	DPH5	YML129C	COX14	0.074
YLR172C	DPH5	YMR063W	RIM9	0.074
YLR172C	DPH5	YMR295C	IBI2	0.074
YLR172C	DPH5	YDR510W_damp	SMT3_damp	0.073
YLR172C	DPH5	YGR131W	YGR131W	0.073
YLR172C	DPH5	YGR252W	GCN5	0.073
YLR172C	DPH5	YIL030C	SSM4	0.073
YLR172C	DPH5	YJL146W	IDS2	0.073
YLR172C	DPH5	YJL170C	ASG7	0.073
YLR172C	DPH5	YLL028W	TPO1	0.073
YLR172C	DPH5	YLL059C	YLL059C	0.073
YLR172C	DPH5	YLR429W	CRN1	0.073
YLR172C	DPH5	YOL003C	PFA4	0.073
YLR172C	DPH5	YPL208W	RKM1	0.073
YLR172C	DPH5	YBR064W	YBR064W	0.072
YLR172C	DPH5	YBR214W	SDS24	0.072
YLR172C	DPH5	YDR385W	EFT2	0.072
YLR172C	DPH5	YER149C	PEA2	0.072
YLR172C	DPH5	YFL052W	YFL052W	0.072
YLR172C	DPH5	YGR279C	SCW4	0.072
YLR172C	DPH5	YLR219W	MSC3	0.072
YLR172C	DPH5	YLR248W	RCK2	0.072
YLR172C	DPH5	YMR104C	YPK2	0.072
YLR172C	DPH5	YOR335C_tsq908	ala1-1	0.072
YLR172C	DPH5	YPL189W	GUP2	0.072
YLR172C	DPH5	YBR123C_tsq568	tfc1-E447K	0.071
YLR172C	DPH5	YBR295W	PCA1	0.071
YLR172C	DPH5	YCL050C	APA1	0.071
YLR172C	DPH5	YDL020C	RPN4	0.071
YLR172C	DPH5	YDR107C	TMN2	0.071
YLR172C	DPH5	YKR065C	PAM17	0.071
YLR172C	DPH5	YLR053C	YLR053C	0.071
YLR172C	DPH5	YMR069W	NAT4	0.071
YLR172C	DPH5	YMR119W-A	YMR119W-A	0.071
YLR172C	DPH5	YPR009W	SUT2	0.071
YLR172C	DPH5	YAL024C	LTE1	0.07
YLR172C	DPH5	YBR076W	ECM8	0.07
YLR172C	DPH5	YBR145W	ADH5	0.07
YLR172C	DPH5	YBR276C	PPS1	0.07
YLR172C	DPH5	YBR294W	SUL1	0.07
YLR172C	DPH5	YDL124W	YDL124W	0.07
YLR172C	DPH5	YGL086W	MAD1	0.07
YLR172C	DPH5	YGR110W	YGR110W	0.07
YLR172C	DPH5	YGR184C	UBR1	0.07
YLR172C	DPH5	YGR274C_tsq524	taf1-1	0.07
YLR172C	DPH5	YHL017W	YHL017W	0.07
YLR172C	DPH5	YIL059C	YIL059C	0.07
YLR172C	DPH5	YJR066W	TOR1	0.07
YLR172C	DPH5	YKL043W	PHD1	0.07
YLR172C	DPH5	YKL187C	YKL187C	0.07
YLR172C	DPH5	YLR384C	IKI3	0.07
YLR172C	DPH5	YLR400W	YLR400W	0.07
YLR172C	DPH5	YPR076W	YPR076W	0.07
YLR172C	DPH5	YDL133W	YDL133W	0.069
YLR172C	DPH5	YDR093W	DNF2	0.069
YLR172C	DPH5	YFL041W	FET5	0.069
YLR172C	DPH5	YGL150C_damp	INO80_damp	0.069
YLR172C	DPH5	YLR398C	SKI2	0.069
YLR172C	DPH5	YMR182C	RGM1	0.069
YLR172C	DPH5	YNR052C_damp	POP2_damp	0.069
YLR172C	DPH5	YOR390W	YOR390W	0.069
YLR172C	DPH5	YPL253C	VIK1	0.069
YLR172C	DPH5	YPR023C	EAF3	0.069
YLR172C	DPH5	YPR096C	YPR096C	0.069
YLR172C	DPH5	YAR002C-A	ERP1	0.068
YLR172C	DPH5	YDL017W_tsq131	cdc7-4	0.068
YLR172C	DPH5	YDR128W	MTC5	0.068
YLR172C	DPH5	YER089C	PTC2	0.068
YLR172C	DPH5	YFR047C	BNA6	0.068
YLR172C	DPH5	YGR105W	VMA21	0.068
YLR172C	DPH5	YGR146C	YGR146C	0.068
YLR172C	DPH5	YJR051W	OSM1	0.068
YLR172C	DPH5	YKL074C	MUD2	0.068
YLR172C	DPH5	YKR098C	UBP11	0.068
YLR172C	DPH5	YLL003W_tsq475	sfi1-3	0.068
YLR172C	DPH5	YLR085C	ARP6	0.068
YLR172C	DPH5	YLR217W	YLR217W	0.068
YLR172C	DPH5	YMR178W	YMR178W	0.068
YLR172C	DPH5	YNR025C	YNR025C	0.068
YLR172C	DPH5	YPR157W	YPR157W	0.068
YLR172C	DPH5	YPR189W	SKI3	0.068
YLR172C	DPH5	YDR349C	YPS7	0.067
YLR172C	DPH5	YGR124W	ASN2	0.067
YLR172C	DPH5	YGR203W	YGR203W	0.067
YLR172C	DPH5	YMR223W	UBP8	0.067
YLR172C	DPH5	YNL215W	IES2	0.067
YLR172C	DPH5	YOR053W	YOR053W	0.067
YLR172C	DPH5	YOR070C	GYP1	0.067
YLR172C	DPH5	YPL183C	RTT10	0.067
YLR172C	DPH5	YBR245C	ISW1	0.066
YLR172C	DPH5	YDR286C	YDR286C	0.066
YLR172C	DPH5	YER184C	YER184C	0.066
YLR172C	DPH5	YHR035W	YHR035W	0.066
YLR172C	DPH5	YHR114W	BZZ1	0.066
YLR172C	DPH5	YIL158W	AIM20	0.066
YLR172C	DPH5	YLR180W	SAM1	0.066
YLR172C	DPH5	YMR129W	POM152	0.066
YLR172C	DPH5	YMR158C-A	YMR158C-A	0.066
YLR172C	DPH5	YMR274C	RCE1	0.066
YLR172C	DPH5	YNL024C	YNL024C	0.066
YLR172C	DPH5	YOL049W	GSH2	0.066
YLR172C	DPH5	YOR191W	ULS1	0.066
YLR172C	DPH5	YPL168W	YPL168W	0.066
YLR172C	DPH5	YPL176C	TRE1	0.066
YLR172C	DPH5	YPR122W	AXL1	0.066
YLR172C	DPH5	YBR301W	DAN3	0.065
YLR172C	DPH5	YDR005C	MAF1	0.065
YLR172C	DPH5	YFR010W	UBP6	0.065
YLR172C	DPH5	YGL162W	SUT1	0.065
YLR172C	DPH5	YGR284C	ERV29	0.065
YLR172C	DPH5	YHR033W	YHR033W	0.065
YLR172C	DPH5	YKL124W	SSH4	0.065
YLR172C	DPH5	YLR040C	YLR040C	0.065
YLR172C	DPH5	YNL064C	YDJ1	0.065
YLR172C	DPH5	YOR244W_tsq560	esa1-L254P	0.065
YLR172C	DPH5	YPL015C	HST2	0.065
YLR172C	DPH5	YPL028W_tsq531	erg10-1	0.065
YLR172C	DPH5	YDL210W	UGA4	0.064
YLR172C	DPH5	YDR281C	PHM6	0.064
YLR172C	DPH5	YDR317W	HIM1	0.064
YLR172C	DPH5	YDR480W	DIG2	0.064
YLR172C	DPH5	YER044C-A	MEI4	0.064
YLR172C	DPH5	YGR266W	YGR266W	0.064
YLR172C	DPH5	YJL134W	LCB3	0.064
YLR172C	DPH5	YLL057C	JLP1	0.064
YLR172C	DPH5	YNR060W	FRE4	0.064
YLR172C	DPH5	YPL001W	HAT1	0.064
YLR172C	DPH5	YPR063C	YPR063C	0.064
YLR172C	DPH5	YBR188C	NTC20	0.063
YLR172C	DPH5	YCL025C	AGP1	0.063
YLR172C	DPH5	YCL049C	YCL049C	0.063
YLR172C	DPH5	YCR082W	AHC2	0.063
YLR172C	DPH5	YCR089W	FIG2	0.063
YLR172C	DPH5	YEL040W	UTR2	0.063
YLR172C	DPH5	YFL049W	SWP82	0.063
YLR172C	DPH5	YLR083C	EMP70	0.063
YLR172C	DPH5	YLR206W	ENT2	0.063
YLR172C	DPH5	YMR053C	STB2	0.063
YLR172C	DPH5	YNL086W	YNL086W	0.063
YLR172C	DPH5	YOL104C	NDJ1	0.063
YLR172C	DPH5	YAL011W	SWC3	0.062
YLR172C	DPH5	YBL031W	SHE1	0.062
YLR172C	DPH5	YDR242W	AMD2	0.062
YLR172C	DPH5	YDR393W	SHE9	0.062
YLR172C	DPH5	YFL039C_tsq77	act1-120	0.062
YLR172C	DPH5	YGR083C_damp	GCD2_damp	0.062
YLR172C	DPH5	YHR187W	IKI1	0.062
YLR172C	DPH5	YHR204W	MNL1	0.062
YLR172C	DPH5	YIL014W	MNT3	0.062
YLR172C	DPH5	YLR227C	ADY4	0.062
YLR172C	DPH5	YLR257W	YLR257W	0.062
YLR172C	DPH5	YLR385C	SWC7	0.062
YLR172C	DPH5	YOR204W_tsq561	ded1-95	0.062
YLR172C	DPH5	YOR292C	YOR292C	0.062
YLR172C	DPH5	YPR075C	OPY2	0.062
YLR172C	DPH5	YBR298C	MAL31	0.061
YLR172C	DPH5	YDR272W	GLO2	0.061
YLR172C	DPH5	YDR481C	PHO8	0.061
YLR172C	DPH5	YGL259W	YPS5	0.061
YLR172C	DPH5	YGR093W	DRN1	0.061
YLR172C	DPH5	YHR061C	GIC1	0.061
YLR172C	DPH5	YHR178W	STB5	0.061
YLR172C	DPH5	YIL079C	AIR1	0.061
YLR172C	DPH5	YKR021W	ALY1	0.061
YLR172C	DPH5	YKR094C	RPL40B	0.061
YLR172C	DPH5	YLR428C	YLR428C	0.061
YLR172C	DPH5	YMR294W-A	YMR294W-A	0.061
YLR172C	DPH5	YNL197C	WHI3	0.061
YLR172C	DPH5	YNL216W_damp	RAP1_damp	0.061
YLR172C	DPH5	YNL263C_damp	YIF1_damp	0.061
YLR172C	DPH5	YOL063C	CRT10	0.061
YLR172C	DPH5	YOR386W	PHR1	0.061
YLR172C	DPH5	YPR178W_tsq500	prp4-1	0.061
YLR172C	DPH5	YBL104C	YBL104C	0.06
YLR172C	DPH5	YDL167C	NRP1	0.06
YLR172C	DPH5	YDL174C	DLD1	0.06
YLR172C	DPH5	YDR095C	YDR095C	0.06
YLR172C	DPH5	YDR210W	YDR210W	0.06
YLR172C	DPH5	YDR318W	MCM21	0.06
YLR172C	DPH5	YFL054C	YFL054C	0.06
YLR172C	DPH5	YHR077C	NMD2	0.06
YLR172C	DPH5	YHR202W	YHR202W	0.06
YLR172C	DPH5	YIL034C	CAP2	0.06
YLR172C	DPH5	YIL064W	SEE1	0.06
YLR172C	DPH5	YKL193C_tsq572	sds22-5	0.06
YLR172C	DPH5	YKR045C	YKR045C	0.06
YLR172C	DPH5	YKR090W	PXL1	0.06
YLR172C	DPH5	YML005W	TRM12	0.06
YLR172C	DPH5	YML048W	GSF2	0.06
YLR172C	DPH5	YMR075C-A	YMR075C-A	0.06
YLR172C	DPH5	YMR225C	MRPL44	0.06
YLR172C	DPH5	YNL120C	YNL120C	0.06
YLR172C	DPH5	YOL030W	GAS5	0.06
YLR172C	DPH5	YOR003W	YSP3	0.06
YLR172C	DPH5	YPL051W	ARL3	0.06
YLR172C	DPH5	YPL198W	RPL7B	0.06
YLR172C	DPH5	YCL029C	BIK1	0.059
YLR172C	DPH5	YCR073W-A	SOL2	0.059
YLR172C	DPH5	YCR107W	AAD3	0.059
YLR172C	DPH5	YDL178W	DLD2	0.059
YLR172C	DPH5	YDR171W	HSP42	0.059
YLR172C	DPH5	YDR213W	UPC2	0.059
YLR172C	DPH5	YFL004W	VTC2	0.059
YLR172C	DPH5	YGL066W	SGF73	0.059
YLR172C	DPH5	YGL196W	DSD1	0.059
YLR172C	DPH5	YGR233C	PHO81	0.059
YLR172C	DPH5	YHR075C	PPE1	0.059
YLR172C	DPH5	YIL018W	RPL2B	0.059
YLR172C	DPH5	YIL095W	PRK1	0.059
YLR172C	DPH5	YJR047C	ANB1	0.059
YLR172C	DPH5	YLR158C	ASP3-3	0.059
YLR172C	DPH5	YLR190W	MMR1	0.059
YLR172C	DPH5	YLR191W	PEX13	0.059
YLR172C	DPH5	YLR314C_tsq885	cdc3-1	0.059
YLR172C	DPH5	YMR007W	YMR007W	0.059
YLR172C	DPH5	YMR139W	RIM11	0.059
YLR172C	DPH5	YNL259C	ATX1	0.059
YLR172C	DPH5	YOR082C	YOR082C	0.059
YLR172C	DPH5	YPR125W	YLH47	0.059
YLR172C	DPH5	YBR083W	TEC1	0.058
YLR172C	DPH5	YDR089W	YDR089W	0.058
YLR172C	DPH5	YDR192C	NUP42	0.058
YLR172C	DPH5	YDR197W	CBS2	0.058
YLR172C	DPH5	YFL047W	RGD2	0.058
YLR172C	DPH5	YGL019W	CKB1	0.058
YLR172C	DPH5	YHR021C	RPS27B	0.058
YLR172C	DPH5	YHR146W	CRP1	0.058
YLR172C	DPH5	YLR236C	YLR236C	0.058
YLR172C	DPH5	YLR374C	YLR374C	0.058
YLR172C	DPH5	YMR095C	SNO1	0.058
YLR172C	DPH5	YNR040W	YNR040W	0.058
YLR172C	DPH5	YOR283W	YOR283W	0.058
YLR172C	DPH5	YPL260W	YPL260W	0.058
YLR172C	DPH5	YBR162C	TOS1	0.057
YLR172C	DPH5	YBR269C	FMP21	0.057
YLR172C	DPH5	YDL168W	SFA1	0.057
YLR172C	DPH5	YDR251W	PAM1	0.057
YLR172C	DPH5	YEL057C	YEL057C	0.057
YLR172C	DPH5	YER047C	SAP1	0.057
YLR172C	DPH5	YER093C-A	AIM11	0.057
YLR172C	DPH5	YGR021W	YGR021W	0.057
YLR172C	DPH5	YGR129W	SYF2	0.057
YLR172C	DPH5	YGR182C	YGR182C	0.057
YLR172C	DPH5	YKL002W	DID4	0.057
YLR172C	DPH5	YOL068C	HST1	0.057
YLR172C	DPH5	YPR114W	YPR114W	0.057
YLR172C	DPH5	YCL035C	GRX1	0.056
YLR172C	DPH5	YCR079W	PTC6	0.056
YLR172C	DPH5	YDL039C	PRM7	0.056
YLR172C	DPH5	YDR073W	SNF11	0.056
YLR172C	DPH5	YDR326C	YSP2	0.056
YLR172C	DPH5	YDR541C	YDR541C	0.056
YLR172C	DPH5	YER013W_tsq237	prp22-1	0.056
YLR172C	DPH5	YFL039C_tsq140	act1-125	0.056
YLR172C	DPH5	YFL046W	FMP32	0.056
YLR172C	DPH5	YGL041C	YGL041C	0.056
YLR172C	DPH5	YGL197W	MDS3	0.056
YLR172C	DPH5	YGR227W	DIE2	0.056
YLR172C	DPH5	YHR060W	VMA22	0.056
YLR172C	DPH5	YHR215W	PHO12	0.056
YLR172C	DPH5	YJL150W	YJL150W	0.056
YLR172C	DPH5	YJL166W	QCR8	0.056
YLR172C	DPH5	YLR050C	YLR050C	0.056
YLR172C	DPH5	YMR244W	YMR244W	0.056
YLR172C	DPH5	YMR279C	YMR279C	0.056
YLR172C	DPH5	YMR320W	YMR320W	0.056
YLR172C	DPH5	YNL140C	YNL140C	0.056
YLR172C	DPH5	YNL313C_damp	YNL313C_damp	0.056
YLR172C	DPH5	YPL014W	YPL014W	0.056
YLR172C	DPH5	YPR049C	ATG11	0.056
YLR172C	DPH5	YBR212W	NGR1	0.055
YLR172C	DPH5	YDL010W	GRX6	0.055
YLR172C	DPH5	YDL017W_tsq880	cdc7-1	0.055
YLR172C	DPH5	YER031C	YPT31	0.055
YLR172C	DPH5	YER177W	BMH1	0.055
YLR172C	DPH5	YHR051W	COX6	0.055
YLR172C	DPH5	YHR208W	BAT1	0.055
YLR172C	DPH5	YIL161W	YIL161W	0.055
YLR172C	DPH5	YLR027C_damp	AAT2_damp	0.055
YLR172C	DPH5	YLR341W	SPO77	0.055
YLR172C	DPH5	YML067C	ERV41	0.055
YLR172C	DPH5	YML076C	WAR1	0.055
YLR172C	DPH5	YMR035W	IMP2	0.055
YLR172C	DPH5	YMR266W	RSN1	0.055
YLR172C	DPH5	YNL145W	MFA2	0.055
YLR172C	DPH5	YPL073C	YPL073C	0.055
YLR172C	DPH5	YPR070W	MED1	0.055
YLR172C	DPH5	YDR070C	FMP16	0.054
YLR172C	DPH5	YDR430C	CYM1	0.054
YLR172C	DPH5	YDR436W	PPZ2	0.054
YLR172C	DPH5	YDR453C	TSA2	0.054
YLR172C	DPH5	YFR026C	ULI1	0.054
YLR172C	DPH5	YFR048W	RMD8	0.054
YLR172C	DPH5	YJR014W	TMA22	0.054
YLR172C	DPH5	YKR067W	GPT2	0.054
YLR172C	DPH5	YLR209C	PNP1	0.054
YLR172C	DPH5	YLR278C	YLR278C	0.054
YLR172C	DPH5	YNL052W	COX5A	0.054
YLR172C	DPH5	YOL047C	YOL047C	0.054
YLR172C	DPH5	YOR066W	MSA1	0.054
YLR172C	DPH5	YOR293W	RPS10A	0.054
YLR172C	DPH5	YPR061C	JID1	0.054
YLR172C	DPH5	YBL059W	YBL059W	0.053
YLR172C	DPH5	YBR015C	MNN2	0.053
YLR172C	DPH5	YBR087W_tsq887	rfc5-1	0.053
YLR172C	DPH5	YBR185C	MBA1	0.053
YLR172C	DPH5	YBR219C	YBR219C	0.053
YLR172C	DPH5	YCR027C	RHB1	0.053
YLR172C	DPH5	YDL015C_damp	TSC13_damp	0.053
YLR172C	DPH5	YDL114W	YDL114W	0.053
YLR172C	DPH5	YDL172C	YDL172C	0.053
YLR172C	DPH5	YFL011W	HXT10	0.053
YLR172C	DPH5	YGR060W_damp	ERG25_damp	0.053
YLR172C	DPH5	YGR122C-A	YGR122C-A	0.053
YLR172C	DPH5	YHR096C	HXT5	0.053
YLR172C	DPH5	YIL035C	CKA1	0.053
YLR172C	DPH5	YIL076W	SEC28	0.053
YLR172C	DPH5	YJL047C	RTT101	0.053
YLR172C	DPH5	YJR069C	HAM1	0.053
YLR172C	DPH5	YKR014C	YPT52	0.053
YLR172C	DPH5	YKR056W	TRM2	0.053
YLR172C	DPH5	YLL047W	YLL047W	0.053
YLR172C	DPH5	YLR077W	FMP25	0.053
YLR172C	DPH5	YLR289W	GUF1	0.053
YLR172C	DPH5	YMR132C	JLP2	0.053
YLR172C	DPH5	YOL087C	DUF1	0.053
YLR172C	DPH5	YOR080W	DIA2	0.053
YLR172C	DPH5	YPL008W	CHL1	0.053
YLR172C	DPH5	YPR066W	UBA3	0.053
YLR172C	DPH5	YPR135W	CTF4	0.053
YLR172C	DPH5	YBL063W	KIP1	0.052
YLR172C	DPH5	YBR235W	YBR235W	0.052
YLR172C	DPH5	YDR046C	BAP3	0.052
YLR172C	DPH5	YDR261C	EXG2	0.052
YLR172C	DPH5	YDR309C	GIC2	0.052
YLR172C	DPH5	YGL081W	YGL081W	0.052
YLR172C	DPH5	YGL152C	YGL152C	0.052
YLR172C	DPH5	YGR281W	YOR1	0.052
YLR172C	DPH5	YHR086W	NAM8	0.052
YLR172C	DPH5	YJL119C	YJL119C	0.052
YLR172C	DPH5	YJL166W_damp	QCR8_damp	0.052
YLR172C	DPH5	YKL105C	YKL105C	0.052
YLR172C	DPH5	YLR187W	SKG3	0.052
YLR172C	DPH5	YLR238W	FAR10	0.052
YLR172C	DPH5	YLR308W	CDA2	0.052
YLR172C	DPH5	YML059C	NTE1	0.052
YLR172C	DPH5	YML096W	YML096W	0.052
YLR172C	DPH5	YML114C_tsq695	taf8-7	0.052
YLR172C	DPH5	YMR033W_tsq495	arp9-1	0.052
YLR172C	DPH5	YMR191W	SPG5	0.052
YLR172C	DPH5	YMR258C	YMR258C	0.052
YLR172C	DPH5	YMR302C	YME2	0.052
YLR172C	DPH5	YNL035C	YNL035C	0.052
YLR172C	DPH5	YNL047C	SLM2	0.052
YLR172C	DPH5	YOR108W	LEU9	0.052
YLR172C	DPH5	YPL116W	HOS3	0.052
YLR172C	DPH5	YPR200C	ARR2	0.052
YLR172C	DPH5	YAL046C	AIM1	0.051
YLR172C	DPH5	YAL051W	OAF1	0.051
YLR172C	DPH5	YBR174C	YBR174C	0.051
YLR172C	DPH5	YCL024W	KCC4	0.051
YLR172C	DPH5	YFR040W	SAP155	0.051
YLR172C	DPH5	YGL114W	YGL114W	0.051
YLR172C	DPH5	YHR064C	SSZ1	0.051
YLR172C	DPH5	YIL047C	SYG1	0.051
YLR172C	DPH5	YKL188C	PXA2	0.051
YLR172C	DPH5	YKL221W	MCH2	0.051
YLR172C	DPH5	YLR090W	XDJ1	0.051
YLR172C	DPH5	YLR144C	ACF2	0.051
YLR172C	DPH5	YLR410W	VIP1	0.051
YLR172C	DPH5	YMR080C	NAM7	0.051
YLR172C	DPH5	YMR235C_tsq172	rna1-S116F	0.051
YLR172C	DPH5	YNL098C	RAS2	0.051
YLR172C	DPH5	YNR001C	CIT1	0.051
YLR172C	DPH5	YOL129W	VPS68	0.051
YLR172C	DPH5	YPL138C	SPP1	0.051
YLR172C	DPH5	YPR201W	ARR3	0.051
YLR172C	DPH5	YBL035C_tsq365	pol12-ts	0.05
YLR172C	DPH5	YBR112C	CYC8	0.05
YLR172C	DPH5	YBR178W	YBR178W	0.05
YLR172C	DPH5	YCL016C	DCC1	0.05
YLR172C	DPH5	YCL028W	RNQ1	0.05
YLR172C	DPH5	YCR025C	YCR025C	0.05
YLR172C	DPH5	YCR100C	YCR100C	0.05
YLR172C	DPH5	YDR203W	YDR203W	0.05
YLR172C	DPH5	YGR141W	VPS62	0.05
YLR172C	DPH5	YHR013C	ARD1	0.05
YLR172C	DPH5	YIR013C	GAT4	0.05
YLR172C	DPH5	YJL123C	MTC1	0.05
YLR172C	DPH5	YKL080W	VMA5	0.05
YLR172C	DPH5	YKL173W_tsq621	snu114-60	0.05
YLR172C	DPH5	YLL015W	BPT1	0.05
YLR172C	DPH5	YMR009W	ADI1	0.05
YLR172C	DPH5	YMR193C-A	YMR193C-A	0.05
YLR172C	DPH5	YMR283C	RIT1	0.05
YLR172C	DPH5	YMR303C	ADH2	0.05
YLR172C	DPH5	YNL074C	MLF3	0.05
YLR172C	DPH5	YOL013C	HRD1	0.05
YLR172C	DPH5	YOL013W-A	YOL013W-A	0.05
YLR172C	DPH5	YOR034C	AKR2	0.05
YLR172C	DPH5	YOR246C	YOR246C	0.05
YLR172C	DPH5	YOR252W	TMA16	0.05
YLR172C	DPH5	YOR291W	YPK9	0.05
YLR172C	DPH5	YPL244C	HUT1	0.05
YLR172C	DPH5	YBR105C	VID24	0.049
YLR172C	DPH5	YBR270C	BIT2	0.049
YLR172C	DPH5	YDL028C_tsq166	mps1-1	0.049
YLR172C	DPH5	YDL145C_tsq704	cop1-1	0.049
YLR172C	DPH5	YDR274C	YDR274C	0.049
YLR172C	DPH5	YER056C	FCY2	0.049
YLR172C	DPH5	YER107C	GLE2	0.049
YLR172C	DPH5	YER151C	UBP3	0.049
YLR172C	DPH5	YFR052W_tsq405	rpn12-1	0.049
YLR172C	DPH5	YHR181W	SVP26	0.049
YLR172C	DPH5	YIL119C	RPI1	0.049
YLR172C	DPH5	YIR023W	DAL81	0.049
YLR172C	DPH5	YJL030W	MAD2	0.049
YLR172C	DPH5	YJL135W	YJL135W	0.049
YLR172C	DPH5	YLR295C	ATP14	0.049
YLR172C	DPH5	YMR044W	IOC4	0.049
YLR172C	DPH5	YMR123W	PKR1	0.049
YLR172C	DPH5	YNL255C	GIS2	0.049
YLR172C	DPH5	YOL055C	THI20	0.049
YLR172C	DPH5	YOL136C	PFK27	0.049
YLR172C	DPH5	YOR227W	HER1	0.049
YLR172C	DPH5	YOR342C	YOR342C	0.049
YLR172C	DPH5	YPL009C	YPL009C	0.049
YLR172C	DPH5	YBR172C	SMY2	0.048
YLR172C	DPH5	YBR293W	VBA2	0.048
YLR172C	DPH5	YDL185W	TFP1	0.048
YLR172C	DPH5	YDR168W_tsq315	cdc37-ts	0.048
YLR172C	DPH5	YDR446W	ECM11	0.048
YLR172C	DPH5	YDR448W	ADA2	0.048
YLR172C	DPH5	YER080W	AIM9	0.048
YLR172C	DPH5	YER123W	YCK3	0.048
YLR172C	DPH5	YER132C	PMD1	0.048
YLR172C	DPH5	YFR046C	CNN1	0.048
YLR172C	DPH5	YGL105W	ARC1	0.048
YLR172C	DPH5	YGR122W	YGR122W	0.048
YLR172C	DPH5	YGR138C	TPO2	0.048
YLR172C	DPH5	YIL101C	XBP1	0.048
YLR172C	DPH5	YIL120W	QDR1	0.048
YLR172C	DPH5	YJL132W	YJL132W	0.048
YLR172C	DPH5	YLR312C	QNQ1	0.048
YLR172C	DPH5	YLR373C	VID22	0.048
YLR172C	DPH5	YMR078C	CTF18	0.048
YLR172C	DPH5	YMR145C	NDE1	0.048
YLR172C	DPH5	YMR304W	UBP15	0.048
YLR172C	DPH5	YNL089C	YNL089C	0.048
YLR172C	DPH5	YOR248W	YOR248W	0.048
YLR172C	DPH5	YPL140C	MKK2	0.048
YLR172C	DPH5	YPL233W_tsq450	nsl1-5	0.048
YLR172C	DPH5	YPR178W_tsq819	prp4-ts	0.048
YLR172C	DPH5	YAL042W	ERV46	0.047
YLR172C	DPH5	YBR197C	YBR197C	0.047
YLR172C	DPH5	YDL211C	YDL211C	0.047
YLR172C	DPH5	YEL034W_tsq736	hyp2-1	0.047
YLR172C	DPH5	YFR023W	PES4	0.047
YLR172C	DPH5	YGL057C	YGL057C	0.047
YLR172C	DPH5	YGR006W_tsq434	prp18-ts	0.047
YLR172C	DPH5	YGR052W	FMP48	0.047
YLR172C	DPH5	YGR270W	YTA7	0.047
YLR172C	DPH5	YHR017W	YSC83	0.047
YLR172C	DPH5	YHR022C	YHR022C	0.047
YLR172C	DPH5	YIL130W	ASG1	0.047
YLR172C	DPH5	YJL211C	YJL211C	0.047
YLR172C	DPH5	YJR059W	PTK2	0.047
YLR172C	DPH5	YKR007W	MEH1	0.047
YLR172C	DPH5	YLL001W	DNM1	0.047
YLR172C	DPH5	YLR296W	YLR296W	0.047
YLR172C	DPH5	YLR324W	PEX30	0.047
YLR172C	DPH5	YML081C-A	ATP18	0.047
YLR172C	DPH5	YMR130W	YMR130W	0.047
YLR172C	DPH5	YMR148W	YMR148W	0.047
YLR172C	DPH5	YMR157C	AIM36	0.047
YLR172C	DPH5	YOR061W	CKA2	0.047
YLR172C	DPH5	YOR290C_damp	SNF2_damp	0.047
YLR172C	DPH5	YOR327C	SNC2	0.047
YLR172C	DPH5	YPL070W	MUK1	0.047
YLR172C	DPH5	YAL008W	FUN14	0.046
YLR172C	DPH5	YAL020C	ATS1	0.046
YLR172C	DPH5	YBL013W	FMT1	0.046
YLR172C	DPH5	YBR007C	DSF2	0.046
YLR172C	DPH5	YBR024W	SCO2	0.046
YLR172C	DPH5	YDL065C	PEX19	0.046
YLR172C	DPH5	YER156C	YER156C	0.046
YLR172C	DPH5	YFR002W_damp	NIC96_damp	0.046
YLR172C	DPH5	YGR008C	STF2	0.046
YLR172C	DPH5	YGR010W	NMA2	0.046
YLR172C	DPH5	YHR078W	YHR078W	0.046
YLR172C	DPH5	YJL197W	UBP12	0.046
YLR172C	DPH5	YKL034W	TUL1	0.046
YLR172C	DPH5	YLR097C	HRT3	0.046
YLR172C	DPH5	YLR148W	PEP3	0.046
YLR172C	DPH5	YML033W	YML033W	0.046
YLR172C	DPH5	YML037C	YML037C	0.046
YLR172C	DPH5	YMR067C	UBX4	0.046
YLR172C	DPH5	YMR119W	ASI1	0.046
YLR172C	DPH5	YMR264W	CUE1	0.046
YLR172C	DPH5	YNL315C	ATP11	0.046
YLR172C	DPH5	YOL008W	COQ10	0.046
YLR172C	DPH5	YOR058C	ASE1	0.046
YLR172C	DPH5	YAL041W_tsq412	cdc24-3	0.045
YLR172C	DPH5	YDL225W	SHS1	0.045
YLR172C	DPH5	YDL234C	GYP7	0.045
YLR172C	DPH5	YDR374C	YDR374C	0.045
YLR172C	DPH5	YDR441C	APT2	0.045
YLR172C	DPH5	YER035W	EDC2	0.045
YLR172C	DPH5	YFL053W	DAK2	0.045
YLR172C	DPH5	YGL211W	NCS6	0.045
YLR172C	DPH5	YGL249W	ZIP2	0.045
YLR172C	DPH5	YGR135W	PRE9	0.045
YLR172C	DPH5	YGR143W	SKN1	0.045
YLR172C	DPH5	YHR136C	SPL2	0.045
YLR172C	DPH5	YIL012W	YIL012W	0.045
YLR172C	DPH5	YJL147C	YJL147C	0.045
YLR172C	DPH5	YKL185W	ASH1	0.045
YLR172C	DPH5	YKR009C	FOX2	0.045
YLR172C	DPH5	YLR001C	YLR001C	0.045
YLR172C	DPH5	YLR218C	YLR218C	0.045
YLR172C	DPH5	YLR313C	SPH1	0.045
YLR172C	DPH5	YMR052W	FAR3	0.045
YLR172C	DPH5	YMR125W_damp	STO1_damp	0.045
YLR172C	DPH5	YMR202W	ERG2	0.045
YLR172C	DPH5	YNL034W	YNL034W	0.045
YLR172C	DPH5	YOR027W	STI1	0.045
YLR172C	DPH5	YOR030W	DFG16	0.045
YLR172C	DPH5	YOR171C	LCB4	0.045
YLR172C	DPH5	YPL060W	LPE10	0.045
YLR172C	DPH5	YPL113C	YPL113C	0.045
YLR172C	DPH5	YAL021C	CCR4	0.044
YLR172C	DPH5	YAL023C	PMT2	0.044
YLR172C	DPH5	YAR029W	YAR029W	0.044
YLR172C	DPH5	YBL029W	YBL029W	0.044
YLR172C	DPH5	YBL091C	MAP2	0.044
YLR172C	DPH5	YBR084W	MIS1	0.044
YLR172C	DPH5	YBR287W	YBR287W	0.044
YLR172C	DPH5	YDL078C	MDH3	0.044
YLR172C	DPH5	YDR137W	RGP1	0.044
YLR172C	DPH5	YDR263C	DIN7	0.044
YLR172C	DPH5	YDR522C	SPS2	0.044
YLR172C	DPH5	YEL038W	UTR4	0.044
YLR172C	DPH5	YER142C	MAG1	0.044
YLR172C	DPH5	YER187W	YER187W	0.044
YLR172C	DPH5	YGR070W	ROM1	0.044
YLR172C	DPH5	YGR218W_damp	CRM1_damp	0.044
YLR172C	DPH5	YHR048W	YHK8	0.044
YLR172C	DPH5	YHR207C	SET5	0.044
YLR172C	DPH5	YIL105C	SLM1	0.044
YLR172C	DPH5	YIL106W_damp	MOB1_damp	0.044
YLR172C	DPH5	YJL012C	VTC4	0.044
YLR172C	DPH5	YJL216C	YJL216C	0.044
YLR172C	DPH5	YKL048C	ELM1	0.044
YLR172C	DPH5	YKR089C	TGL4	0.044
YLR172C	DPH5	YLR342W	FKS1	0.044
YLR172C	DPH5	YML100W	TSL1	0.044
YLR172C	DPH5	YML109W	ZDS2	0.044
YLR172C	DPH5	YMR127C	SAS2	0.044
YLR172C	DPH5	YMR244C-A	YMR244C-A	0.044
YLR172C	DPH5	YOR015W	YOR015W	0.044
YLR172C	DPH5	YOR037W	CYC2	0.044
YLR172C	DPH5	YOR128C	ADE2	0.044
YLR172C	DPH5	YOR393W	ERR1	0.044
YLR172C	DPH5	YCL013W	YCL013W	0.043
YLR172C	DPH5	YDR315C	IPK1	0.043
YLR172C	DPH5	YGR149W	YGR149W	0.043
YLR172C	DPH5	YHL020C	OPI1	0.043
YLR172C	DPH5	YHR166C_tsq89	cdc23-1	0.043
YLR172C	DPH5	YIL156W	UBP7	0.043
YLR172C	DPH5	YJR040W	GEF1	0.043
YLR172C	DPH5	YLR216C	CPR6	0.043
YLR172C	DPH5	YLR447C	VMA6	0.043
YLR172C	DPH5	YML057W	CMP2	0.043
YLR172C	DPH5	YMR031C	YMR031C	0.043
YLR172C	DPH5	YMR154C	RIM13	0.043
YLR172C	DPH5	YMR186W	HSC82	0.043
YLR172C	DPH5	YOR051C	YOR051C	0.043
YLR172C	DPH5	YOR307C	SLY41	0.043
YLR172C	DPH5	YPL032C	SVL3	0.043
YLR172C	DPH5	YPL133C	RDS2	0.043
YLR172C	DPH5	YPL220W	RPL1A	0.043
YLR172C	DPH5	YBR051W	YBR051W	0.042
YLR172C	DPH5	YBR107C	IML3	0.042
YLR172C	DPH5	YBR277C	YBR277C	0.042
YLR172C	DPH5	YCL005W-A	VMA9	0.042
YLR172C	DPH5	YDR259C	YAP6	0.042
YLR172C	DPH5	YDR290W	YDR290W	0.042
YLR172C	DPH5	YDR312W	SSF2	0.042
YLR172C	DPH5	YDR421W	ARO80	0.042
YLR172C	DPH5	YER051W	JHD1	0.042
YLR172C	DPH5	YER152C	YER152C	0.042
YLR172C	DPH5	YFL033C	RIM15	0.042
YLR172C	DPH5	YGL067W	NPY1	0.042
YLR172C	DPH5	YGR133W	PEX4	0.042
YLR172C	DPH5	YHL030W	ECM29	0.042
YLR172C	DPH5	YHR142W	CHS7	0.042
YLR172C	DPH5	YIR032C	DAL3	0.042
YLR172C	DPH5	YJL074C_tsq259	smc3-1	0.042
YLR172C	DPH5	YJR050W	ISY1	0.042
YLR172C	DPH5	YKL077W	YKL077W	0.042
YLR172C	DPH5	YLL041C	SDH2	0.042
YLR172C	DPH5	YLL053C	YLL053C	0.042
YLR172C	DPH5	YLR260W	LCB5	0.042
YLR172C	DPH5	YNL090W	RHO2	0.042
YLR172C	DPH5	YNR049C	MSO1	0.042
YLR172C	DPH5	YOR039W	CKB2	0.042
YLR172C	DPH5	YOR177C	MPC54	0.042
YLR172C	DPH5	YPL067C	YPL067C	0.042
YLR172C	DPH5	YAL025C_damp	MAK16_damp	0.041
YLR172C	DPH5	YBL008W	HIR1	0.041
YLR172C	DPH5	YBR030W	RKM3	0.041
YLR172C	DPH5	YBR032W	YBR032W	0.041
YLR172C	DPH5	YBR208C	DUR1,2	0.041
YLR172C	DPH5	YDL079C	MRK1	0.041
YLR172C	DPH5	YDL088C	ASM4	0.041
YLR172C	DPH5	YDR072C	IPT1	0.041
YLR172C	DPH5	YDR098C	GRX3	0.041
YLR172C	DPH5	YDR110W	FOB1	0.041
YLR172C	DPH5	YDR329C	PEX3	0.041
YLR172C	DPH5	YDR438W	THI74	0.041
YLR172C	DPH5	YDR472W_damp	TRS31_damp	0.041
YLR172C	DPH5	YGL003C	CDH1	0.041
YLR172C	DPH5	YGL046W	YGL046W	0.041
YLR172C	DPH5	YGL063W	PUS2	0.041
YLR172C	DPH5	YGL083W	SCY1	0.041
YLR172C	DPH5	YGR185C_tsq290	tys1-1	0.041
YLR172C	DPH5	YJL145W	SFH5	0.041
YLR172C	DPH5	YJR103W	URA8	0.041
YLR172C	DPH5	YKL057C	NUP120	0.041
YLR172C	DPH5	YKL072W	STB6	0.041
YLR172C	DPH5	YLR111W	YLR111W	0.041
YLR172C	DPH5	YMR037C	MSN2	0.041
YLR172C	DPH5	YMR308C_tsq683	pse1-41	0.041
YLR172C	DPH5	YOL137W	BSC6	0.041
YLR172C	DPH5	YOR097C	YOR097C	0.041
YLR172C	DPH5	YOR349W	CIN1	0.041
YLR172C	DPH5	YOR375C	GDH1	0.041
YLR172C	DPH5	YPL090C	RPS6A	0.041
YLR172C	DPH5	YAR035W	YAT1	0.04
YLR172C	DPH5	YBL075C	SSA3	0.04
YLR172C	DPH5	YBR078W	ECM33	0.04
YLR172C	DPH5	YDL011C	YDL011C	0.04
YLR172C	DPH5	YDL236W	PHO13	0.04
YLR172C	DPH5	YDR052C_tsq163	dbf4-3	0.04
YLR172C	DPH5	YDR239C	YDR239C	0.04
YLR172C	DPH5	YDR400W	URH1	0.04
YLR172C	DPH5	YDR502C	SAM2	0.04
YLR172C	DPH5	YEL012W	UBC8	0.04
YLR172C	DPH5	YFL007W	BLM10	0.04
YLR172C	DPH5	YGL155W_tsq333	cdc43-2	0.04
YLR172C	DPH5	YHL014C	YLF2	0.04
YLR172C	DPH5	YIL100W	YIL100W	0.04
YLR172C	DPH5	YJL004C	SYS1	0.04
YLR172C	DPH5	YJL099W	CHS6	0.04
YLR172C	DPH5	YJL187C	SWE1	0.04
YLR172C	DPH5	YKL081W	TEF4	0.04
YLR172C	DPH5	YKL123W	YKL123W	0.04
YLR172C	DPH5	YKL140W	TGL1	0.04
YLR172C	DPH5	YLR152C	YLR152C	0.04
YLR172C	DPH5	YLR263W	RED1	0.04
YLR172C	DPH5	YLR292C	SEC72	0.04
YLR172C	DPH5	YML016C	PPZ1	0.04
YLR172C	DPH5	YMR054W	STV1	0.04
YLR172C	DPH5	YMR172C-A	YMR172C-A	0.04
YLR172C	DPH5	YMR273C	ZDS1	0.04
YLR172C	DPH5	YOL098C	YOL098C	0.04
YLR172C	DPH5	YOL103W	ITR2	0.04
YLR172C	DPH5	YOR049C	RSB1	0.04
YLR172C	DPH5	YOR062C	YOR062C	0.04
YLR172C	DPH5	YOR166C	SWT1	0.04
YLR172C	DPH5	YOR195W	SLK19	0.04
YLR172C	DPH5	YPR101W	SNT309	0.04
YLR172C	DPH5	YPR120C	CLB5	0.04
YLR172C	DPH5	YBR241C	YBR241C	0.039
YLR172C	DPH5	YCL075W	YCL075W	0.039
YLR172C	DPH5	YCR065W	HCM1	0.039
YLR172C	DPH5	YDL001W	RMD1	0.039
YLR172C	DPH5	YDL050C	YDL050C	0.039
YLR172C	DPH5	YDR100W	TVP15	0.039
YLR172C	DPH5	YDR109C	YDR109C	0.039
YLR172C	DPH5	YDR207C	UME6	0.039
YLR172C	DPH5	YDR283C	GCN2	0.039
YLR172C	DPH5	YDR306C	YDR306C	0.039
YLR172C	DPH5	YER019C-A	SBH2	0.039
YLR172C	DPH5	YER166W	DNF1	0.039
YLR172C	DPH5	YFL034C-A	RPL22B	0.039
YLR172C	DPH5	YGL180W	ATG1	0.039
YLR172C	DPH5	YGL226W	MTC3	0.039
YLR172C	DPH5	YGR019W	UGA1	0.039
YLR172C	DPH5	YGR048W_tsq677	ufd1-2	0.039
YLR172C	DPH5	YGR229C	SMI1	0.039
YLR172C	DPH5	YHR057C	CPR2	0.039
YLR172C	DPH5	YHR105W	YPT35	0.039
YLR172C	DPH5	YJR088C	EMC2	0.039
YLR172C	DPH5	YJR108W	ABM1	0.039
YLR172C	DPH5	YLR110C	CCW12	0.039
YLR172C	DPH5	YLR171W	YLR171W	0.039
YLR172C	DPH5	YLR421C	RPN13	0.039
YLR172C	DPH5	YLR432W	IMD3	0.039
YLR172C	DPH5	YMR004W	MVP1	0.039
YLR172C	DPH5	YMR041C	ARA2	0.039
YLR172C	DPH5	YMR169C	ALD3	0.039
YLR172C	DPH5	YMR280C	CAT8	0.039
YLR172C	DPH5	YPR141C	KAR3	0.039
YLR172C	DPH5	YAL022C	FUN26	0.038
YLR172C	DPH5	YAR031W	PRM9	0.038
YLR172C	DPH5	YBL037W	APL3	0.038
YLR172C	DPH5	YBL061C	SKT5	0.038
YLR172C	DPH5	YBR141C	YBR141C	0.038
YLR172C	DPH5	YBR213W	MET8	0.038
YLR172C	DPH5	YCL042W	YCL042W	0.038
YLR172C	DPH5	YDL025C	YDL025C	0.038
YLR172C	DPH5	YDR044W_damp	HEM13_damp	0.038
YLR172C	DPH5	YDR120C	TRM1	0.038
YLR172C	DPH5	YDR131C	YDR131C	0.038
YLR172C	DPH5	YDR151C	CTH1	0.038
YLR172C	DPH5	YDR512C	EMI1	0.038
YLR172C	DPH5	YDR532C	YDR532C	0.038
YLR172C	DPH5	YER140W	YER140W	0.038
YLR172C	DPH5	YFL044C	OTU1	0.038
YLR172C	DPH5	YGL032C	AGA2	0.038
YLR172C	DPH5	YGL228W	SHE10	0.038
YLR172C	DPH5	YGR014W	MSB2	0.038
YLR172C	DPH5	YGR197C	SNG1	0.038
YLR172C	DPH5	YHL012W	YHL012W	0.038
YLR172C	DPH5	YHL044W	YHL044W	0.038
YLR172C	DPH5	YHR015W	MIP6	0.038
YLR172C	DPH5	YIL062C_tsq888	arc15-10	0.038
YLR172C	DPH5	YJL020C	BBC1	0.038
YLR172C	DPH5	YJL133W	MRS3	0.038
YLR172C	DPH5	YJR126C	VPS70	0.038
YLR172C	DPH5	YKL161C	YKL161C	0.038
YLR172C	DPH5	YLR015W	BRE2	0.038
YLR172C	DPH5	YLR079W	SIC1	0.038
YLR172C	DPH5	YLR272C_tsq432	ycs4-1	0.038
YLR172C	DPH5	YLR332W	MID2	0.038
YLR172C	DPH5	YLR395C	COX8	0.038
YLR172C	DPH5	YML070W	DAK1	0.038
YLR172C	DPH5	YML071C	COG8	0.038
YLR172C	DPH5	YPL041C	YPL041C	0.038
YLR172C	DPH5	YPL074W	YTA6	0.038
YLR172C	DPH5	YPR015C	YPR015C	0.038
YLR172C	DPH5	YPR147C	YPR147C	0.038
YLR172C	DPH5	YAL034W-A_tsq235	mtw1-ts	0.037
YLR172C	DPH5	YBL102W	SFT2	0.037
YLR172C	DPH5	YBL103C	RTG3	0.037
YLR172C	DPH5	YCR106W	RDS1	0.037
YLR172C	DPH5	YDL218W	YDL218W	0.037
YLR172C	DPH5	YDR205W	MSC2	0.037
YLR172C	DPH5	YDR495C	VPS3	0.037
YLR172C	DPH5	YGL084C	GUP1	0.037
YLR172C	DPH5	YGL173C	KEM1	0.037
YLR172C	DPH5	YGL218W	YGL218W	0.037
YLR172C	DPH5	YGR099W_tsq604	tel2-7	0.037
YLR172C	DPH5	YGR206W	MVB12	0.037
YLR172C	DPH5	YIL073C	SPO22	0.037
YLR172C	DPH5	YIL098C	FMC1	0.037
YLR172C	DPH5	YJL192C	SOP4	0.037
YLR172C	DPH5	YJL214W	HXT8	0.037
YLR172C	DPH5	YKL213C	DOA1	0.037
YLR172C	DPH5	YKR018C	YKR018C	0.037
YLR172C	DPH5	YKR061W	KTR2	0.037
YLR172C	DPH5	YLL054C	YLL054C	0.037
YLR172C	DPH5	YLR024C	UBR2	0.037
YLR172C	DPH5	YLR173W	YLR173W	0.037
YLR172C	DPH5	YLR194C	YLR194C	0.037
YLR172C	DPH5	YMR087W	YMR087W	0.037
YLR172C	DPH5	YMR189W	GCV2	0.037
YLR172C	DPH5	YMR259C	YMR259C	0.037
YLR172C	DPH5	YMR291W	YMR291W	0.037
YLR172C	DPH5	YNL144C	YNL144C	0.037
YLR172C	DPH5	YNL271C	BNI1	0.037
YLR172C	DPH5	YOL018C	TLG2	0.037
YLR172C	DPH5	YOR140W	SFL1	0.037
YLR172C	DPH5	YOR180C	DCI1	0.037
YLR172C	DPH5	YPL263C	KEL3	0.037
YLR172C	DPH5	YPR173C	VPS4	0.037
YLR172C	DPH5	YAR002W	NUP60	0.036
YLR172C	DPH5	YBR148W	YSW1	0.036
YLR172C	DPH5	YBR265W_tsq543	tsc10-1	0.036
YLR172C	DPH5	YBR275C	RIF1	0.036
YLR172C	DPH5	YCR061W	YCR061W	0.036
YLR172C	DPH5	YDL176W	YDL176W	0.036
YLR172C	DPH5	YDR108W	GSG1	0.036
YLR172C	DPH5	YDR243C_tsq574	prp28-101	0.036
YLR172C	DPH5	YDR254W	CHL4	0.036
YLR172C	DPH5	YDR282C	YDR282C	0.036
YLR172C	DPH5	YGL059W	PKP2	0.036
YLR172C	DPH5	YGL184C	STR3	0.036
YLR172C	DPH5	YGL234W	ADE5,7	0.036
YLR172C	DPH5	YGR027C	RPS25A	0.036
YLR172C	DPH5	YGR080W	TWF1	0.036
YLR172C	DPH5	YGR207C	YGR207C	0.036
YLR172C	DPH5	YHR020W_damp	YHR020W_damp	0.036
YLR172C	DPH5	YHR045W	YHR045W	0.036
YLR172C	DPH5	YHR094C	HXT1	0.036
YLR172C	DPH5	YIL025C	YIL025C	0.036
YLR172C	DPH5	YIL067C	YIL067C	0.036
YLR172C	DPH5	YKL094W	YJU3	0.036
YLR172C	DPH5	YKR003W	OSH6	0.036
YLR172C	DPH5	YKR030W	GMH1	0.036
YLR172C	DPH5	YKR050W	TRK2	0.036
YLR172C	DPH5	YLL045C	RPL8B	0.036
YLR172C	DPH5	YLR018C	POM34	0.036
YLR172C	DPH5	YLR039C	RIC1	0.036
YLR172C	DPH5	YLR210W	CLB4	0.036
YLR172C	DPH5	YML014W	TRM9	0.036
YLR172C	DPH5	YML075C	HMG1	0.036
YLR172C	DPH5	YMR237W	BCH1	0.036
YLR172C	DPH5	YNL014W	HEF3	0.036
YLR172C	DPH5	YNR030W	ALG12	0.036
YLR172C	DPH5	YOL019W	YOL019W	0.036
YLR172C	DPH5	YOL131W	YOL131W	0.036
YLR172C	DPH5	YOR008C-A	YOR008C-A	0.036
YLR172C	DPH5	YOR275C	RIM20	0.036
YLR172C	DPH5	YOR346W	REV1	0.036
YLR172C	DPH5	YPL159C	PET20	0.036
YLR172C	DPH5	YPR005C	HAL1	0.036
YLR172C	DPH5	YPR134W	MSS18	0.036
YLR172C	DPH5	YBL051C	PIN4	0.035
YLR172C	DPH5	YBR206W	YBR206W	0.035
YLR172C	DPH5	YCL010C	SGF29	0.035
YLR172C	DPH5	YDR055W	PST1	0.035
YLR172C	DPH5	YDR155C	CPR1	0.035
YLR172C	DPH5	YDR229W	IVY1	0.035
YLR172C	DPH5	YDR363W	ESC2	0.035
YLR172C	DPH5	YDR375C	BCS1	0.035
YLR172C	DPH5	YER066W	YER066W	0.035
YLR172C	DPH5	YER079W	YER079W	0.035
YLR172C	DPH5	YER113C	TMN3	0.035
YLR172C	DPH5	YGR041W	BUD9	0.035
YLR172C	DPH5	YHR046C	INM1	0.035
YLR172C	DPH5	YHR076W	PTC7	0.035
YLR172C	DPH5	YJL049W	YJL049W	0.035
YLR172C	DPH5	YJR010W	MET3	0.035
YLR172C	DPH5	YJR118C	ILM1	0.035
YLR172C	DPH5	YKL017C	HCS1	0.035
YLR172C	DPH5	YKL203C_tsq398	tor2-21	0.035
YLR172C	DPH5	YKR076W	ECM4	0.035
YLR172C	DPH5	YLL014W	EMC6	0.035
YLR172C	DPH5	YLR038C	COX12	0.035
YLR172C	DPH5	YLR183C	TOS4	0.035
YLR172C	DPH5	YLR319C	BUD6	0.035
YLR172C	DPH5	YLR376C	PSY3	0.035
YLR172C	DPH5	YLR378C_tsq213	sec61-2	0.035
YLR172C	DPH5	YMR026C	PEX12	0.035
YLR172C	DPH5	YMR100W	MUB1	0.035
YLR172C	DPH5	YMR152W	YIM1	0.035
YLR172C	DPH5	YNL027W	CRZ1	0.035
YLR172C	DPH5	YOR071C	NRT1	0.035
YLR172C	DPH5	YOR121C	YOR121C	0.035
YLR172C	DPH5	YOR214C	YOR214C	0.035
YLR172C	DPH5	YOR245C	DGA1	0.035
YLR172C	DPH5	YOR325W	YOR325W	0.035
YLR172C	DPH5	YPL214C	THI6	0.035
YLR172C	DPH5	YAL066W	YAL066W	0.034
YLR172C	DPH5	YBL003C	HTA2	0.034
YLR172C	DPH5	YBL048W	RRT1	0.034
YLR172C	DPH5	YBR283C	SSH1	0.034
YLR172C	DPH5	YDL051W	LHP1	0.034
YLR172C	DPH5	YDR408C	ADE8	0.034
YLR172C	DPH5	YDR490C	PKH1	0.034
YLR172C	DPH5	YER053C	PIC2	0.034
YLR172C	DPH5	YER075C	PTP3	0.034
YLR172C	DPH5	YFL009W_tsq415	cdc4-2	0.034
YLR172C	DPH5	YGL039W	YGL039W	0.034
YLR172C	DPH5	YGL146C	YGL146C	0.034
YLR172C	DPH5	YGL200C	EMP24	0.034
YLR172C	DPH5	YHR007C_damp	ERG11_damp	0.034
YLR172C	DPH5	YHR131C	YHR131C	0.034
YLR172C	DPH5	YHR143W	DSE2	0.034
YLR172C	DPH5	YIL036W	CST6	0.034
YLR172C	DPH5	YIL043C	CBR1	0.034
YLR172C	DPH5	YJL136C	RPS21B	0.034
YLR172C	DPH5	YJL208C	NUC1	0.034
YLR172C	DPH5	YKL197C	PEX1	0.034
YLR172C	DPH5	YLL050C_tsq234	cof1-5	0.034
YLR172C	DPH5	YLR019W	PSR2	0.034
YLR172C	DPH5	YLR049C	YLR049C	0.034
YLR172C	DPH5	YLR329W	REC102	0.034
YLR172C	DPH5	YLR401C	DUS3	0.034
YLR172C	DPH5	YML035C-A	YML035C-A	0.034
YLR172C	DPH5	YMR086W	YMR086W	0.034
YLR172C	DPH5	YNL044W	YIP3	0.034
YLR172C	DPH5	YNL082W	PMS1	0.034
YLR172C	DPH5	YNL115C	YNL115C	0.034
YLR172C	DPH5	YNL250W	RAD50	0.034
YLR172C	DPH5	YOR067C	ALG8	0.034
YLR172C	DPH5	YOR115C	TRS33	0.034
YLR172C	DPH5	YOR304C-A	YOR304C-A	0.034
YLR172C	DPH5	YOR317W	FAA1	0.034
YLR172C	DPH5	YOR326W_tsq337	myo2-16	0.034
YLR172C	DPH5	YPL047W	SGF11	0.034
YLR172C	DPH5	YPL200W	CSM4	0.034
YLR172C	DPH5	YPR006C	ICL2	0.034
YLR172C	DPH5	YBL034C_tsq822	stu1-12	0.033
YLR172C	DPH5	YBL071C	YBL071C	0.033
YLR172C	DPH5	YBR063C	YBR063C	0.033
YLR172C	DPH5	YBR093C	PHO5	0.033
YLR172C	DPH5	YBR098W	MMS4	0.033
YLR172C	DPH5	YBR232C	YBR232C	0.033
YLR172C	DPH5	YCR087C-A	LUG1	0.033
YLR172C	DPH5	YDL101C	DUN1	0.033
YLR172C	DPH5	YDL115C	IWR1	0.033
YLR172C	DPH5	YDL123W	SNA4	0.033
YLR172C	DPH5	YDL129W	YDL129W	0.033
YLR172C	DPH5	YDL231C	BRE4	0.033
YLR172C	DPH5	YDR142C	PEX7	0.033
YLR172C	DPH5	YDR338C	YDR338C	0.033
YLR172C	DPH5	YDR440W	DOT1	0.033
YLR172C	DPH5	YDR485C	VPS72	0.033
YLR172C	DPH5	YER153C	PET122	0.033
YLR172C	DPH5	YGR107W	YGR107W	0.033
YLR172C	DPH5	YHR189W	PTH1	0.033
YLR172C	DPH5	YIR010W_tsq435	dsn1-7	0.033
YLR172C	DPH5	YJL110C	GZF3	0.033
YLR172C	DPH5	YJL159W	HSP150	0.033
YLR172C	DPH5	YKL190W	CNB1	0.033
YLR172C	DPH5	YKR042W	UTH1	0.033
YLR172C	DPH5	YLR114C	AVL9	0.033
YLR172C	DPH5	YLR160C	ASP3-4	0.033
YLR172C	DPH5	YML012W	ERV25	0.033
YLR172C	DPH5	YMR311C	GLC8	0.033
YLR172C	DPH5	YMR312W	ELP6	0.033
YLR172C	DPH5	YNL231C	PDR16	0.033
YLR172C	DPH5	YNR032C-A	HUB1	0.033
YLR172C	DPH5	YOL113W	SKM1	0.033
YLR172C	DPH5	YOR299W	BUD7	0.033
YLR172C	DPH5	YPR077C	YPR077C	0.033
YLR172C	DPH5	YPR083W	MDM36	0.033
YLR172C	DPH5	YBR080C_tsq57	sec18-1	0.032
YLR172C	DPH5	YBR261C	TAE1	0.032
YLR172C	DPH5	YCL036W	GFD2	0.032
YLR172C	DPH5	YDL175C	AIR2	0.032
YLR172C	DPH5	YDR030C	RAD28	0.032
YLR172C	DPH5	YDR035W	ARO3	0.032
YLR172C	DPH5	YDR148C	KGD2	0.032
YLR172C	DPH5	YDR245W	MNN10	0.032
YLR172C	DPH5	YDR319C	YFT2	0.032
YLR172C	DPH5	YDR351W	SBE2	0.032
YLR172C	DPH5	YDR469W	SDC1	0.032
YLR172C	DPH5	YER143W	DDI1	0.032
YLR172C	DPH5	YER170W	ADK2	0.032
YLR172C	DPH5	YGL237C	HAP2	0.032
YLR172C	DPH5	YGR173W	RBG2	0.032
YLR172C	DPH5	YGR230W	BNS1	0.032
YLR172C	DPH5	YHR132C	ECM14	0.032
YLR172C	DPH5	YIL138C	TPM2	0.032
YLR172C	DPH5	YJR116W	YJR116W	0.032
YLR172C	DPH5	YKL030W	YKL030W	0.032
YLR172C	DPH5	YKL090W	CUE2	0.032
YLR172C	DPH5	YKL109W	HAP4	0.032
YLR172C	DPH5	YKL135C	APL2	0.032
YLR172C	DPH5	YKL162C	YKL162C	0.032
YLR172C	DPH5	YKR049C	FMP46	0.032
YLR172C	DPH5	YKR078W	YKR078W	0.032
YLR172C	DPH5	YLR103C_tsq694	cdc45-27	0.032
YLR172C	DPH5	YLR363C	NMD4	0.032
YLR172C	DPH5	YMR319C	FET4	0.032
YLR172C	DPH5	YNL012W	SPO1	0.032
YLR172C	DPH5	YNL136W	EAF7	0.032
YLR172C	DPH5	YNR012W	URK1	0.032
YLR172C	DPH5	YOR023C	AHC1	0.032
YLR172C	DPH5	YOR229W	WTM2	0.032
YLR172C	DPH5	YPL241C	CIN2	0.032
YLR172C	DPH5	YPL270W	MDL2	0.032
YLR172C	DPH5	YBR247C_tsq542	enp1-1	0.031
YLR172C	DPH5	YCR028C-A	RIM1	0.031
YLR172C	DPH5	YDR153C	ENT5	0.031
YLR172C	DPH5	YDR257C	RKM4	0.031
YLR172C	DPH5	YEL024W	RIP1	0.031
YLR172C	DPH5	YER092W	IES5	0.031
YLR172C	DPH5	YGL112C_tsq608	taf6-ts	0.031
YLR172C	DPH5	YGL116W_tsq368	cdc20-3	0.031
YLR172C	DPH5	YGR268C	HUA1	0.031
YLR172C	DPH5	YIL083C_damp	YIL083C_damp	0.031
YLR172C	DPH5	YJL108C	PRM10	0.031
YLR172C	DPH5	YJL215C	YJL215C	0.031
YLR172C	DPH5	YJR087W	YJR087W	0.031
YLR172C	DPH5	YKL149C	DBR1	0.031
YLR172C	DPH5	YKL171W	YKL171W	0.031
YLR172C	DPH5	YKL179C	COY1	0.031
YLR172C	DPH5	YKR105C	VBA5	0.031
YLR172C	DPH5	YLL017W	YLL017W	0.031
YLR172C	DPH5	YLR094C	GIS3	0.031
YLR172C	DPH5	YLR188W	MDL1	0.031
YLR172C	DPH5	YLR262C	YPT6	0.031
YLR172C	DPH5	YLR352W	YLR352W	0.031
YLR172C	DPH5	YLR375W	STP3	0.031
YLR172C	DPH5	YMR171C	EAR1	0.031
YLR172C	DPH5	YMR207C	HFA1	0.031
YLR172C	DPH5	YNL134C	YNL134C	0.031
YLR172C	DPH5	YNR006W	VPS27	0.031
YLR172C	DPH5	YOR296W	YOR296W	0.031
YLR172C	DPH5	YOR310C_damp	NOP58_damp	0.031
YLR172C	DPH5	YOR316C	COT1	0.031
YLR172C	DPH5	YPL246C	RBD2	0.031
YLR172C	DPH5	YPR036W	VMA13	0.031
YLR172C	DPH5	YPR126C	YPR126C	0.031
YLR172C	DPH5	YAL019W	FUN30	0.03
YLR172C	DPH5	YBR264C	YPT10	0.03
YLR172C	DPH5	YBR292C	YBR292C	0.03
YLR172C	DPH5	YCL001W-A	YCL001W-A	0.03
YLR172C	DPH5	YDL182W	LYS20	0.03
YLR172C	DPH5	YDR150W	NUM1	0.03
YLR172C	DPH5	YDR180W_tsq69	scc2-4	0.03
YLR172C	DPH5	YDR193W	YDR193W	0.03
YLR172C	DPH5	YDR287W	INM2	0.03
YLR172C	DPH5	YDR511W	ACN9	0.03
YLR172C	DPH5	YER084W	YER084W	0.03
YLR172C	DPH5	YFL010W-A	AUA1	0.03
YLR172C	DPH5	YFL055W	AGP3	0.03
YLR172C	DPH5	YFR022W	ROG3	0.03
YLR172C	DPH5	YGL055W_tsq506	ole1-m2	0.03
YLR172C	DPH5	YGR136W	LSB1	0.03
YLR172C	DPH5	YHR137W	ARO9	0.03
YLR172C	DPH5	YIL007C	NAS2	0.03
YLR172C	DPH5	YIL028W	YIL028W	0.03
YLR172C	DPH5	YIL137C	TMA108	0.03
YLR172C	DPH5	YIR025W	MND2	0.03
YLR172C	DPH5	YJL059W	YHC3	0.03
YLR172C	DPH5	YJL093C	TOK1	0.03
YLR172C	DPH5	YJL142C	IRC9	0.03
YLR172C	DPH5	YJL180C	ATP12	0.03
YLR172C	DPH5	YJR135C	MCM22	0.03
YLR172C	DPH5	YKL008C	LAC1	0.03
YLR172C	DPH5	YKL025C	PAN3	0.03
YLR172C	DPH5	YKL062W	MSN4	0.03
YLR172C	DPH5	YKR059W	TIF1	0.03
YLR172C	DPH5	YKR080W	MTD1	0.03
YLR172C	DPH5	YKR099W	BAS1	0.03
YLR172C	DPH5	YML094W	GIM5	0.03
YLR172C	DPH5	YMR027W	YMR027W	0.03
YLR172C	DPH5	YMR136W	GAT2	0.03
YLR172C	DPH5	YNR018W	AIM38	0.03
YLR172C	DPH5	YOL151W	GRE2	0.03
YLR172C	DPH5	YOR018W	ROD1	0.03
YLR172C	DPH5	YOR059C	YOR059C	0.03
YLR172C	DPH5	YOR085W	OST3	0.03
YLR172C	DPH5	YOR178C	GAC1	0.03
YLR172C	DPH5	YPL034W	YPL034W	0.03
YLR172C	DPH5	YPR171W	BSP1	0.03
YLR172C	DPH5	YBL052C	SAS3	0.029
YLR172C	DPH5	YBR033W	EDS1	0.029
YLR172C	DPH5	YBR085W	AAC3	0.029
YLR172C	DPH5	YCL051W	LRE1	0.029
YLR172C	DPH5	YDL100C	GET3	0.029
YLR172C	DPH5	YDR334W	SWR1	0.029
YLR172C	DPH5	YDR344C	YDR344C	0.029
YLR172C	DPH5	YDR380W	ARO10	0.029
YLR172C	DPH5	YDR399W	HPT1	0.029
YLR172C	DPH5	YER110C_damp	KAP123_damp	0.029
YLR172C	DPH5	YHR081W	LRP1	0.029
YLR172C	DPH5	YHR103W	SBE22	0.029
YLR172C	DPH5	YHR133C	NSG1	0.029
YLR172C	DPH5	YHR191C	CTF8	0.029
YLR172C	DPH5	YIR024C	YIR024C	0.029
YLR172C	DPH5	YJR011C	YJR011C	0.029
YLR172C	DPH5	YKL033W-A	YKL033W-A	0.029
YLR172C	DPH5	YKL206C	ADD66	0.029
YLR172C	DPH5	YKR011C	YKR011C	0.029
YLR172C	DPH5	YLR124W	YLR124W	0.029
YLR172C	DPH5	YLR125W	YLR125W	0.029
YLR172C	DPH5	YLR337C	VRP1	0.029
YLR172C	DPH5	YML103C	NUP188	0.029
YLR172C	DPH5	YMR052C-A	YMR052C-A	0.029
YLR172C	DPH5	YMR092C	AIP1	0.029
YLR172C	DPH5	YMR236W_tsq730	taf9-ts2	0.029
YLR172C	DPH5	YMR326C	YMR326C	0.029
YLR172C	DPH5	YNR072W	HXT17	0.029
YLR172C	DPH5	YOR133W	EFT1	0.029
YLR172C	DPH5	YOR138C	RUP1	0.029
YLR172C	DPH5	YOR163W	DDP1	0.029
YLR172C	DPH5	YPL163C	SVS1	0.029
YLR172C	DPH5	YPL177C	CUP9	0.029
YLR172C	DPH5	YPR007C	REC8	0.029
YLR172C	DPH5	YPR062W	FCY1	0.029
YLR172C	DPH5	YBL062W	YBL062W	0.028
YLR172C	DPH5	YBR278W	DPB3	0.028
YLR172C	DPH5	YBR284W	YBR284W	0.028
YLR172C	DPH5	YCR007C	YCR007C	0.028
YLR172C	DPH5	YCR045C	YCR045C	0.028
YLR172C	DPH5	YDL008W_damp	APC11_damp	0.028
YLR172C	DPH5	YDR043C	NRG1	0.028
YLR172C	DPH5	YDR225W	HTA1	0.028
YLR172C	DPH5	YDR249C	YDR249C	0.028
YLR172C	DPH5	YDR252W	BTT1	0.028
YLR172C	DPH5	YDR294C	DPL1	0.028
YLR172C	DPH5	YDR322C-A	TIM11	0.028
YLR172C	DPH5	YDR360W	OPI7	0.028
YLR172C	DPH5	YDR388W	RVS167	0.028
YLR172C	DPH5	YDR505C	PSP1	0.028
YLR172C	DPH5	YDR514C	YDR514C	0.028
YLR172C	DPH5	YDR533C	HSP31	0.028
YLR172C	DPH5	YER005W	YND1	0.028
YLR172C	DPH5	YFR018C	YFR018C	0.028
YLR172C	DPH5	YGL045W	RIM8	0.028
YLR172C	DPH5	YGL221C	NIF3	0.028
YLR172C	DPH5	YHR150W	PEX28	0.028
YLR172C	DPH5	YIL008W	URM1	0.028
YLR172C	DPH5	YIL107C	PFK26	0.028
YLR172C	DPH5	YIL167W	SDL1	0.028
YLR172C	DPH5	YIR001C	SGN1	0.028
YLR172C	DPH5	YJR130C	STR2	0.028
YLR172C	DPH5	YKR035W-A	DID2	0.028
YLR172C	DPH5	YLR004C	THI73	0.028
YLR172C	DPH5	YLR380W	CSR1	0.028
YLR172C	DPH5	YMR018W	YMR018W	0.028
YLR172C	DPH5	YNL063W	MTQ1	0.028
YLR172C	DPH5	YNL119W	NCS2	0.028
YLR172C	DPH5	YNL253W	TEX1	0.028
YLR172C	DPH5	YOR005C	DNL4	0.028
YLR172C	DPH5	YOR254C_tsq231	sec63-1	0.028
YLR172C	DPH5	YPR172W	YPR172W	0.028
YLR172C	DPH5	YBL001C	ECM15	0.027
YLR172C	DPH5	YBL050W_tsq48	sec17-1	0.027
YLR172C	DPH5	YBL058W	SHP1	0.027
YLR172C	DPH5	YBR109C_tsq157	cmd1-8	0.027
YLR172C	DPH5	YBR203W	COS111	0.027
YLR172C	DPH5	YBR210W	ERV15	0.027
YLR172C	DPH5	YCL023C	YCL023C	0.027
YLR172C	DPH5	YCL076W	YCL076W	0.027
YLR172C	DPH5	YCR024C-A	PMP1	0.027
YLR172C	DPH5	YDR088C_tsq656	slu7-ts1	0.027
YLR172C	DPH5	YDR168W_tsq317	cdc37-1	0.027
YLR172C	DPH5	YDR307W	YDR307W	0.027
YLR172C	DPH5	YDR335W	MSN5	0.027
YLR172C	DPH5	YDR340W	YDR340W	0.027
YLR172C	DPH5	YEL070W	DSF1	0.027
YLR172C	DPH5	YGL104C	VPS73	0.027
YLR172C	DPH5	YGL203C	KEX1	0.027
YLR172C	DPH5	YGR091W_tsq472	prp31-1	0.027
YLR172C	DPH5	YHL040C	ARN1	0.027
YLR172C	DPH5	YHR108W	GGA2	0.027
YLR172C	DPH5	YIL029C	YIL029C	0.027
YLR172C	DPH5	YIL058W	YIL058W	0.027
YLR172C	DPH5	YIL066C	RNR3	0.027
YLR172C	DPH5	YJL067W	YJL067W	0.027
YLR172C	DPH5	YJR005W	APL1	0.027
YLR172C	DPH5	YKR036C	CAF4	0.027
YLR172C	DPH5	YLR002C_damp	NOC3_damp	0.027
YLR172C	DPH5	YLR297W	YLR297W	0.027
YLR172C	DPH5	YLR321C_tsq955	sfh1-1	0.027
YLR172C	DPH5	YLR449W	FPR4	0.027
YLR172C	DPH5	YMR003W	AIM34	0.027
YLR172C	DPH5	YMR138W	CIN4	0.027
YLR172C	DPH5	YMR179W	SPT21	0.027
YLR172C	DPH5	YMR322C	SNO4	0.027
YLR172C	DPH5	YOL002C	IZH2	0.027
YLR172C	DPH5	YOL012C	HTZ1	0.027
YLR172C	DPH5	YOR035C	SHE4	0.027
YLR172C	DPH5	YOR156C	NFI1	0.027
YLR172C	DPH5	YOR228C	YOR228C	0.027
YLR172C	DPH5	YOR377W	ATF1	0.027
YLR172C	DPH5	YPL004C	LSP1	0.027
YLR172C	DPH5	YPL247C	YPL247C	0.027
YLR172C	DPH5	YPR003C	YPR003C	0.027
YLR172C	DPH5	YPR069C	SPE3	0.027
YLR172C	DPH5	YPR194C	OPT2	0.027
YLR172C	DPH5	YBR094W	PBY1	0.026
YLR172C	DPH5	YBR169C	SSE2	0.026
YLR172C	DPH5	YBR300C	YBR300C	0.026
YLR172C	DPH5	YDL026W	YDL026W	0.026
YLR172C	DPH5	YDL242W	YDL242W	0.026
YLR172C	DPH5	YDR032C	PST2	0.026
YLR172C	DPH5	YDR291W	HRQ1	0.026
YLR172C	DPH5	YDR488C	PAC11	0.026
YLR172C	DPH5	YDR513W	GRX2	0.026
YLR172C	DPH5	YDR518W	EUG1	0.026
YLR172C	DPH5	YEL061C	CIN8	0.026
YLR172C	DPH5	YFR039C	YFR039C	0.026
YLR172C	DPH5	YGR106C	VOA1	0.026
YLR172C	DPH5	YGR151C	YGR151C	0.026
YLR172C	DPH5	YGR216C_tsq548	gpi1-1	0.026
YLR172C	DPH5	YHL027W	RIM101	0.026
YLR172C	DPH5	YHR111W	UBA4	0.026
YLR172C	DPH5	YIL054W	YIL054W	0.026
YLR172C	DPH5	YIL165C	YIL165C	0.026
YLR172C	DPH5	YJR019C	TES1	0.026
YLR172C	DPH5	YLR073C	YLR073C	0.026
YLR172C	DPH5	YLR315W	NKP2	0.026
YLR172C	DPH5	YML038C	YMD8	0.026
YLR172C	DPH5	YML123C	PHO84	0.026
YLR172C	DPH5	YMR101C	SRT1	0.026
YLR172C	DPH5	YMR173W	DDR48	0.026
YLR172C	DPH5	YMR180C	CTL1	0.026
YLR172C	DPH5	YNL159C	ASI2	0.026
YLR172C	DPH5	YOR006C	TSR3	0.026
YLR172C	DPH5	YOR188W	MSB1	0.026
YLR172C	DPH5	YOR384W	FRE5	0.026
YLR172C	DPH5	YPL045W	VPS16	0.026
YLR172C	DPH5	YPL091W	GLR1	0.026
YLR172C	DPH5	YPL101W	ELP4	0.026
YLR172C	DPH5	YBL096C	YBL096C	0.025
YLR172C	DPH5	YBR006W	UGA2	0.025
YLR172C	DPH5	YBR028C	YBR028C	0.025
YLR172C	DPH5	YBR090C	YBR090C	0.025
YLR172C	DPH5	YBR205W	KTR3	0.025
YLR172C	DPH5	YBR249C	ARO4	0.025
YLR172C	DPH5	YDR011W	SNQ2	0.025
YLR172C	DPH5	YER137C	YER137C	0.025
YLR172C	DPH5	YFL009W_tsq334	cdc4-3	0.025
YLR172C	DPH5	YFR045W	YFR045W	0.025
YLR172C	DPH5	YGL090W	LIF1	0.025
YLR172C	DPH5	YGL257C	MNT2	0.025
YLR172C	DPH5	YGR050C	YGR050C	0.025
YLR172C	DPH5	YGR157W	CHO2	0.025
YLR172C	DPH5	YIL087C	LRC2	0.025
YLR172C	DPH5	YJL051W	IRC8	0.025
YLR172C	DPH5	YKL167C	MRP49	0.025
YLR172C	DPH5	YLR044C	PDC1	0.025
YLR172C	DPH5	YLR233C	EST1	0.025
YLR172C	DPH5	YLR259C_damp	HSP60_damp	0.025
YLR172C	DPH5	YLR300W	EXG1	0.025
YLR172C	DPH5	YLR446W	YLR446W	0.025
YLR172C	DPH5	YML053C	YML053C	0.025
YLR172C	DPH5	YMR124W	YMR124W	0.025
YLR172C	DPH5	YMR161W	HLJ1	0.025
YLR172C	DPH5	YMR162C	DNF3	0.025
YLR172C	DPH5	YMR251W-A	HOR7	0.025
YLR172C	DPH5	YMR265C	YMR265C	0.025
YLR172C	DPH5	YNL156C	NSG2	0.025
YLR172C	DPH5	YOL067C	RTG1	0.025
YLR172C	DPH5	YPL017C	IRC15	0.025
YLR172C	DPH5	YPL018W	CTF19	0.025
YLR172C	DPH5	YPL027W	SMA1	0.025
YLR172C	DPH5	YPR026W	ATH1	0.025
YLR172C	DPH5	YPR051W	MAK3	0.025
YLR172C	DPH5	YAL055W	PEX22	0.024
YLR172C	DPH5	YAR020C	PAU7	0.024
YLR172C	DPH5	YBR134W	YBR134W	0.024
YLR172C	DPH5	YBR160W_tsq175	cdc28-13	0.024
YLR172C	DPH5	YCR037C	PHO87	0.024
YLR172C	DPH5	YCR059C	YIH1	0.024
YLR172C	DPH5	YDL194W	SNF3	0.024
YLR172C	DPH5	YDL203C	ACK1	0.024
YLR172C	DPH5	YDL212W_damp	SHR3_damp	0.024
YLR172C	DPH5	YDR157W	YDR157W	0.024
YLR172C	DPH5	YDR185C	UPS3	0.024
YLR172C	DPH5	YDR256C	CTA1	0.024
YLR172C	DPH5	YDR285W	ZIP1	0.024
YLR172C	DPH5	YDR314C	RAD34	0.024
YLR172C	DPH5	YER048C	CAJ1	0.024
YLR172C	DPH5	YER049W	TPA1	0.024
YLR172C	DPH5	YGL098W_tsq592	use1-ts	0.024
YLR172C	DPH5	YGL205W	POX1	0.024
YLR172C	DPH5	YGL252C	RTG2	0.024
YLR172C	DPH5	YGR023W	MTL1	0.024
YLR172C	DPH5	YGR032W	GSC2	0.024
YLR172C	DPH5	YGR069W	YGR069W	0.024
YLR172C	DPH5	YGR223C	HSV2	0.024
YLR172C	DPH5	YGR238C	KEL2	0.024
YLR172C	DPH5	YHR014W	SPO13	0.024
YLR172C	DPH5	YHR038W	RRF1	0.024
YLR172C	DPH5	YIL072W	HOP1	0.024
YLR172C	DPH5	YIL123W	SIM1	0.024
YLR172C	DPH5	YJL055W	YJL055W	0.024
YLR172C	DPH5	YJR053W	BFA1	0.024
YLR172C	DPH5	YJR099W	YUH1	0.024
YLR172C	DPH5	YKL005C	BYE1	0.024
YLR172C	DPH5	YLL024C	SSA2	0.024
YLR172C	DPH5	YLR011W	LOT6	0.024
YLR172C	DPH5	YLR084C	RAX2	0.024
YLR172C	DPH5	YLR335W	NUP2	0.024
YLR172C	DPH5	YMR118C	YMR118C	0.024
YLR172C	DPH5	YMR126C	DLT1	0.024
YLR172C	DPH5	YMR219W	ESC1	0.024
YLR172C	DPH5	YMR299C	DYN3	0.024
YLR172C	DPH5	YNL016W	PUB1	0.024
YLR172C	DPH5	YNL102W_tsq344	pol1-2	0.024
YLR172C	DPH5	YNR022C	MRPL50	0.024
YLR172C	DPH5	YNR066C	YNR066C	0.024
YLR172C	DPH5	YOL162W	YOL162W	0.024
YLR172C	DPH5	YOL163W	YOL163W	0.024
YLR172C	DPH5	YOR041C	YOR041C	0.024
YLR172C	DPH5	YOR239W	ABP140	0.024
YLR172C	DPH5	YOR333C	YOR333C	0.024
YLR172C	DPH5	YOR363C	PIP2	0.024
YLR172C	DPH5	YPL171C	OYE3	0.024
YLR172C	DPH5	YPL174C	NIP100	0.024
YLR172C	DPH5	YAL049C	AIM2	0.023
YLR172C	DPH5	YBL015W	ACH1	0.023
YLR172C	DPH5	YBL021C	HAP3	0.023
YLR172C	DPH5	YBL027W	RPL19B	0.023
YLR172C	DPH5	YBR100W	YBR100W	0.023
YLR172C	DPH5	YCL032W	STE50	0.023
YLR172C	DPH5	YCR102C	YCR102C	0.023
YLR172C	DPH5	YDR020C	DAS2	0.023
YLR172C	DPH5	YDR022C	CIS1	0.023
YLR172C	DPH5	YDR163W	CWC15	0.023
YLR172C	DPH5	YDR278C	YDR278C	0.023
YLR172C	DPH5	YDR372C	VPS74	0.023
YLR172C	DPH5	YDR458C	HEH2	0.023
YLR172C	DPH5	YEL027W	CUP5	0.023
YLR172C	DPH5	YFL025C	BST1	0.023
YLR172C	DPH5	YFR034C	PHO4	0.023
YLR172C	DPH5	YGR194C	XKS1	0.023
YLR172C	DPH5	YHL021C	AIM17	0.023
YLR172C	DPH5	YJL105W	SET4	0.023
YLR172C	DPH5	YJR037W	YJR037W	0.023
YLR172C	DPH5	YJR098C	YJR098C	0.023
YLR172C	DPH5	YKL029C	MAE1	0.023
YLR172C	DPH5	YKL039W	PTM1	0.023
YLR172C	DPH5	YKL061W	YKL061W	0.023
YLR172C	DPH5	YKL100C	YKL100C	0.023
YLR172C	DPH5	YKL183W	LOT5	0.023
YLR172C	DPH5	YKR102W	FLO10	0.023
YLR172C	DPH5	YLL051C	FRE6	0.023
YLR172C	DPH5	YLR013W	GAT3	0.023
YLR172C	DPH5	YLR070C	XYL2	0.023
YLR172C	DPH5	YLR370C	ARC18	0.023
YLR172C	DPH5	YMR110C	HFD1	0.023
YLR172C	DPH5	YMR181C	YMR181C	0.023
YLR172C	DPH5	YMR224C	MRE11	0.023
YLR172C	DPH5	YMR245W	YMR245W	0.023
YLR172C	DPH5	YNL299W	TRF5	0.023
YLR172C	DPH5	YOL057W	YOL057W	0.023
YLR172C	DPH5	YOR021C	YOR021C	0.023
YLR172C	DPH5	YOR162C	YRR1	0.023
YLR172C	DPH5	YOR184W	SER1	0.023
YLR172C	DPH5	YOR298C-A	MBF1	0.023
YLR172C	DPH5	YPL130W	SPO19	0.023
YLR172C	DPH5	YPL134C	ODC1	0.023
YLR172C	DPH5	YPL145C	KES1	0.023
YLR172C	DPH5	YPL180W	TCO89	0.023
YLR172C	DPH5	YPL203W	TPK2	0.023
YLR172C	DPH5	YPL221W	FLC1	0.023
YLR172C	DPH5	YPR014C	YPR014C	0.023
YLR172C	DPH5	YAL010C	MDM10	0.022
YLR172C	DPH5	YAR003W	SWD1	0.022
YLR172C	DPH5	YBL017C	PEP1	0.022
YLR172C	DPH5	YBR027C	YBR027C	0.022
YLR172C	DPH5	YBR034C	HMT1	0.022
YLR172C	DPH5	YDL080C	THI3	0.022
YLR172C	DPH5	YDL109C	YDL109C	0.022
YLR172C	DPH5	YDL137W	ARF2	0.022
YLR172C	DPH5	YDL141W_damp	BPL1_damp	0.022
YLR172C	DPH5	YDL161W	ENT1	0.022
YLR172C	DPH5	YDR057W	YOS9	0.022
YLR172C	DPH5	YDR068W	DOS2	0.022
YLR172C	DPH5	YDR304C	CPR5	0.022
YLR172C	DPH5	YDR402C	DIT2	0.022
YLR172C	DPH5	YGR028W	MSP1	0.022
YLR172C	DPH5	YGR119C_tsq957	nup57-E17	0.022
YLR172C	DPH5	YGR126W	YGR126W	0.022
YLR172C	DPH5	YGR256W	GND2	0.022
YLR172C	DPH5	YHR006W	STP2	0.022
YLR172C	DPH5	YHR097C	YHR097C	0.022
YLR172C	DPH5	YHR154W	RTT107	0.022
YLR172C	DPH5	YIL077C	YIL077C	0.022
YLR172C	DPH5	YJL203W_tsq401	prp21-ts	0.022
YLR172C	DPH5	YJR030C	YJR030C	0.022
YLR172C	DPH5	YJR140C	HIR3	0.022
YLR172C	DPH5	YLR174W	IDP2	0.022
YLR172C	DPH5	YLR239C	LIP2	0.022
YLR172C	DPH5	YLR348C	DIC1	0.022
YLR172C	DPH5	YMR011W	HXT2	0.022
YLR172C	DPH5	YMR048W	CSM3	0.022
YLR172C	DPH5	YMR149W_damp	SWP1_damp	0.022
YLR172C	DPH5	YMR317W	YMR317W	0.022
YLR172C	DPH5	YNL010W	YNL010W	0.022
YLR172C	DPH5	YNL157W	IGO1	0.022
YLR172C	DPH5	YNL181W_damp	YNL181W_damp	0.022
YLR172C	DPH5	YOR043W	WHI2	0.022
YLR172C	DPH5	YOR076C	SKI7	0.022
YLR172C	DPH5	YOR328W	PDR10	0.022
YLR172C	DPH5	YOR350C	MNE1	0.022
YLR172C	DPH5	YPL204W_damp	HRR25_damp	0.022
YLR172C	DPH5	YPL225W	YPL225W	0.022
YLR172C	DPH5	YPL232W	SSO1	0.022
YLR172C	DPH5	YPR164W	MMS1	0.022
YLR172C	DPH5	YBR281C	DUG2	0.021
YLR172C	DPH5	YCR044C	PER1	0.021
YLR172C	DPH5	YDL058W_tsq441	uso1-1	0.021
YLR172C	DPH5	YDR026C	YDR026C	0.021
YLR172C	DPH5	YDR077W	SED1	0.021
YLR172C	DPH5	YDR260C	SWM1	0.021
YLR172C	DPH5	YDR379W	RGA2	0.021
YLR172C	DPH5	YER176W	ECM32	0.021
YLR172C	DPH5	YFL008W_tsq321	smc1-2	0.021
YLR172C	DPH5	YFL010C	WWM1	0.021
YLR172C	DPH5	YGL153W	PEX14	0.021
YLR172C	DPH5	YGL224C	SDT1	0.021
YLR172C	DPH5	YGR140W_tsq133	cbf2-1	0.021
YLR172C	DPH5	YGR155W	CYS4	0.021
YLR172C	DPH5	YHR034C	PIH1	0.021
YLR172C	DPH5	YHR079C-B	YHR079C-B	0.021
YLR172C	DPH5	YHR200W	RPN10	0.021
YLR172C	DPH5	YIL124W	AYR1	0.021
YLR172C	DPH5	YIR035C	YIR035C	0.021
YLR172C	DPH5	YJL115W	ASF1	0.021
YLR172C	DPH5	YJL129C_damp	TRK1_damp	0.021
YLR172C	DPH5	YJL164C	TPK1	0.021
YLR172C	DPH5	YLR003C	CMS1	0.021
YLR172C	DPH5	YLR192C	HCR1	0.021
YLR172C	DPH5	YLR246W	ERF2	0.021
YLR172C	DPH5	YLR383W_tsq747	smc6-9	0.021
YLR172C	DPH5	YML007W	YAP1	0.021
YLR172C	DPH5	YML054C	CYB2	0.021
YLR172C	DPH5	YML078W	CPR3	0.021
YLR172C	DPH5	YMR209C	YMR209C	0.021
YLR172C	DPH5	YMR285C	NGL2	0.021
YLR172C	DPH5	YNL049C	SFB2	0.021
YLR172C	DPH5	YNL051W	COG5	0.021
YLR172C	DPH5	YNL080C	EOS1	0.021
YLR172C	DPH5	YNL083W	SAL1	0.021
YLR172C	DPH5	YNL153C	GIM3	0.021
YLR172C	DPH5	YOL020W	TAT2	0.021
YLR172C	DPH5	YOR012W	YOR012W	0.021
YLR172C	DPH5	YOR050C	YOR050C	0.021
YLR172C	DPH5	YOR255W	OSW1	0.021
YLR172C	DPH5	YOR286W	AIM42	0.021
YLR172C	DPH5	YPL157W	TGS1	0.021
YLR172C	DPH5	YPL245W	YPL245W	0.021
YLR172C	DPH5	YPR145W	ASN1	0.021
YLR172C	DPH5	YAL063C	FLO9	0.02
YLR172C	DPH5	YCR012W_damp	PGK1_damp	0.02
YLR172C	DPH5	YDL012C	YDL012C	0.02
YLR172C	DPH5	YDL102W_tsq17	cdc2-7	0.02
YLR172C	DPH5	YDL120W_damp	YFH1_damp	0.02
YLR172C	DPH5	YDR024W	FYV1	0.02
YLR172C	DPH5	YDR033W	MRH1	0.02
YLR172C	DPH5	YDR183W	PLP1	0.02
YLR172C	DPH5	YDR189W_tsq251	sly1-ts	0.02
YLR172C	DPH5	YEL020C	YEL020C	0.02
YLR172C	DPH5	YER124C	DSE1	0.02
YLR172C	DPH5	YFR008W	FAR7	0.02
YLR172C	DPH5	YGL013C	PDR1	0.02
YLR172C	DPH5	YGL163C	RAD54	0.02
YLR172C	DPH5	YGL165C	YGL165C	0.02
YLR172C	DPH5	YGL262W	YGL262W	0.02
YLR172C	DPH5	YGR068C	ART5	0.02
YLR172C	DPH5	YHL046C	PAU13	0.02
YLR172C	DPH5	YHR195W	NVJ1	0.02
YLR172C	DPH5	YIL046W_tsq939	met30-9	0.02
YLR172C	DPH5	YIL145C	PAN6	0.02
YLR172C	DPH5	YIL150C_tsq110	mcm10-1	0.02
YLR172C	DPH5	YJL210W	PEX2	0.02
YLR172C	DPH5	YJR025C	BNA1	0.02
YLR172C	DPH5	YJR060W	CBF1	0.02
YLR172C	DPH5	YJR078W	BNA2	0.02
YLR172C	DPH5	YKR020W	VPS51	0.02
YLR172C	DPH5	YKR038C_damp	KAE1_damp	0.02
YLR172C	DPH5	YLR098C	CHA4	0.02
YLR172C	DPH5	YLR104W	YLR104W	0.02
YLR172C	DPH5	YLR299W	ECM38	0.02
YLR172C	DPH5	YML030W	AIM31	0.02
YLR172C	DPH5	YML104C	MDM1	0.02
YLR172C	DPH5	YMR029C	FAR8	0.02
YLR172C	DPH5	YMR040W	YET2	0.02
YLR172C	DPH5	YMR083W	ADH3	0.02
YLR172C	DPH5	YMR208W_damp	ERG12_damp	0.02
YLR172C	DPH5	YMR243C	ZRC1	0.02
YLR172C	DPH5	YOL053W	AIM39	0.02
YLR172C	DPH5	YOL099C	YOL099C	0.02
YLR172C	DPH5	YOL109W	ZEO1	0.02
YLR172C	DPH5	YOL112W	MSB4	0.02
YLR172C	DPH5	YOR221C	MCT1	0.02
YLR172C	DPH5	YPL029W	SUV3	0.02
YLR172C	DPH5	YPL069C	BTS1	0.02
YLR172C	DPH5	YPL086C	ELP3	0.02
YLR172C	DPH5	YPL089C	RLM1	0.02
YLR172C	DPH5	YPL227C	ALG5	0.02
YLR172C	DPH5	YPR167C	MET16	0.02
YLR172C	DPH5	YAL029C	MYO4	0.019
YLR172C	DPH5	YAL030W	SNC1	0.019
YLR172C	DPH5	YAL041W_tsq149	cdc24-4	0.019
YLR172C	DPH5	YAL058C-A	YAL058C-A	0.019
YLR172C	DPH5	YBL083C	YBL083C	0.019
YLR172C	DPH5	YBL105C_tsq535	pkc1-ts	0.019
YLR172C	DPH5	YCR088W	ABP1	0.019
YLR172C	DPH5	YDL201W	TRM8	0.019
YLR172C	DPH5	YDR056C	YDR056C	0.019
YLR172C	DPH5	YDR113C_tsq862	pds1-128	0.019
YLR172C	DPH5	YDR248C	YDR248C	0.019
YLR172C	DPH5	YDR316W	OMS1	0.019
YLR172C	DPH5	YDR428C	BNA7	0.019
YLR172C	DPH5	YEL030W_damp	ECM10_damp	0.019
YLR172C	DPH5	YER062C	HOR2	0.019
YLR172C	DPH5	YER090W	TRP2	0.019
YLR172C	DPH5	YFR030W	MET10	0.019
YLR172C	DPH5	YGL004C	RPN14	0.019
YLR172C	DPH5	YGL034C	YGL034C	0.019
YLR172C	DPH5	YGL149W	YGL149W	0.019
YLR172C	DPH5	YGL232W	TAN1	0.019
YLR172C	DPH5	YGL254W	FZF1	0.019
YLR172C	DPH5	YGR239C	PEX21	0.019
YLR172C	DPH5	YHR107C_tsq33	cdc12-1	0.019
YLR172C	DPH5	YIR027C	DAL1	0.019
YLR172C	DPH5	YJL042W	MHP1	0.019
YLR172C	DPH5	YJL161W	FMP33	0.019
YLR172C	DPH5	YJR129C	YJR129C	0.019
YLR172C	DPH5	YKL032C	IXR1	0.019
YLR172C	DPH5	YKL046C	DCW1	0.019
YLR172C	DPH5	YLR020C	YEH2	0.019
YLR172C	DPH5	YLR387C	REH1	0.019
YLR172C	DPH5	YML060W	OGG1	0.019
YLR172C	DPH5	YMR036C	MIH1	0.019
YLR172C	DPH5	YMR068W	AVO2	0.019
YLR172C	DPH5	YMR159C	ATG16	0.019
YLR172C	DPH5	YMR198W	CIK1	0.019
YLR172C	DPH5	YMR233W	TRI1	0.019
YLR172C	DPH5	YNL070W	TOM7	0.019
YLR172C	DPH5	YNL118C_tsq743	dcp2-7	0.019
YLR172C	DPH5	YOL088C	MPD2	0.019
YLR172C	DPH5	YOR026W	BUB3	0.019
YLR172C	DPH5	YOR264W	DSE3	0.019
YLR172C	DPH5	YOR274W	MOD5	0.019
YLR172C	DPH5	YPL036W	PMA2	0.019
YLR172C	DPH5	YPL078C_damp	ATP4_damp	0.019
YLR172C	DPH5	YAL053W	FLC2	0.018
YLR172C	DPH5	YBL078C	ATG8	0.018
YLR172C	DPH5	YBR130C	SHE3	0.018
YLR172C	DPH5	YBR165W	UBS1	0.018
YLR172C	DPH5	YCL069W	VBA3	0.018
YLR172C	DPH5	YDL071C	YDL071C	0.018
YLR172C	DPH5	YDR165W	TRM82	0.018
YLR172C	DPH5	YDR391C	YDR391C	0.018
YLR172C	DPH5	YDR517W	GRH1	0.018
YLR172C	DPH5	YEL017C-A	PMP2	0.018
YLR172C	DPH5	YGL050W	TYW3	0.018
YLR172C	DPH5	YGR200C	ELP2	0.018
YLR172C	DPH5	YHR116W	COX23	0.018
YLR172C	DPH5	YIL053W	RHR2	0.018
YLR172C	DPH5	YIL085C	KTR7	0.018
YLR172C	DPH5	YIL154C	IMP2'	0.018
YLR172C	DPH5	YIR039C	YPS6	0.018
YLR172C	DPH5	YJL036W	SNX4	0.018
YLR172C	DPH5	YJL183W	MNN11	0.018
YLR172C	DPH5	YJL193W	YJL193W	0.018
YLR172C	DPH5	YJL198W	PHO90	0.018
YLR172C	DPH5	YJR062C	NTA1	0.018
YLR172C	DPH5	YJR080C	AIM24	0.018
YLR172C	DPH5	YJR115W	YJR115W	0.018
YLR172C	DPH5	YKL131W	YKL131W	0.018
YLR172C	DPH5	YKL203C_tsq838	tor2-29	0.018
YLR172C	DPH5	YKR070W	YKR070W	0.018
YLR172C	DPH5	YLL021W	SPA2	0.018
YLR172C	DPH5	YLL029W	FRA1	0.018
YLR172C	DPH5	YLL039C	UBI4	0.018
YLR172C	DPH5	YLR047C	FRE8	0.018
YLR172C	DPH5	YLR130C	ZRT2	0.018
YLR172C	DPH5	YLR266C	PDR8	0.018
YLR172C	DPH5	YLR364W	GRX8	0.018
YLR172C	DPH5	YLR454W	FMP27	0.018
YLR172C	DPH5	YML002W	YML002W	0.018
YLR172C	DPH5	YMR030W	RSF1	0.018
YLR172C	DPH5	YMR165C	PAH1	0.018
YLR172C	DPH5	YNL021W	HDA1	0.018
YLR172C	DPH5	YNL104C	LEU4	0.018
YLR172C	DPH5	YOL017W	ESC8	0.018
YLR172C	DPH5	YOL054W	PSH1	0.018
YLR172C	DPH5	YOL080C	REX4	0.018
YLR172C	DPH5	YOR270C	VPH1	0.018
YLR172C	DPH5	YOR271C	FSF1	0.018
YLR172C	DPH5	YPL039W	YPL039W	0.018
YLR172C	DPH5	YPL164C	MLH3	0.018
YLR172C	DPH5	YPL231W_damp	FAS2_damp	0.018
YLR172C	DPH5	YAL017W	PSK1	0.017
YLR172C	DPH5	YAL041W_tsq148	cdc24-11	0.017
YLR172C	DPH5	YBL047C	EDE1	0.017
YLR172C	DPH5	YBR054W	YRO2	0.017
YLR172C	DPH5	YBR204C	YBR204C	0.017
YLR172C	DPH5	YBR258C	SHG1	0.017
YLR172C	DPH5	YDL093W	PMT5	0.017
YLR172C	DPH5	YDL117W	CYK3	0.017
YLR172C	DPH5	YDL146W	LDB17	0.017
YLR172C	DPH5	YDR013W_tsq583	psf1-1	0.017
YLR172C	DPH5	YDR124W	YDR124W	0.017
YLR172C	DPH5	YDR159W	SAC3	0.017
YLR172C	DPH5	YDR214W	AHA1	0.017
YLR172C	DPH5	YDR217C	RAD9	0.017
YLR172C	DPH5	YDR463W	STP1	0.017
YLR172C	DPH5	YGL179C	TOS3	0.017
YLR172C	DPH5	YGR040W	KSS1	0.017
YLR172C	DPH5	YGR117C	YGR117C	0.017
YLR172C	DPH5	YGR176W	YGR176W	0.017
YLR172C	DPH5	YGR247W	CPD1	0.017
YLR172C	DPH5	YGR291C	YGR291C	0.017
YLR172C	DPH5	YJL066C	MPM1	0.017
YLR172C	DPH5	YJR032W	CPR7	0.017
YLR172C	DPH5	YKL079W	SMY1	0.017
YLR172C	DPH5	YKR051W	YKR051W	0.017
YLR172C	DPH5	YLL026W	HSP104	0.017
YLR172C	DPH5	YLR008C_tsq501	pam18-1	0.017
YLR172C	DPH5	YLR023C	IZH3	0.017
YLR172C	DPH5	YLR045C_tsq550	stu2-12	0.017
YLR172C	DPH5	YLR065C	YLR065C	0.017
YLR172C	DPH5	YLR092W	SUL2	0.017
YLR172C	DPH5	YLR107W	REX3	0.017
YLR172C	DPH5	YLR149C	YLR149C	0.017
YLR172C	DPH5	YLR367W	RPS22B	0.017
YLR172C	DPH5	YLR392C	YLR392C	0.017
YLR172C	DPH5	YLR460C	YLR460C	0.017
YLR172C	DPH5	YML058C-A	YML058C-A	0.017
YLR172C	DPH5	YMR227C_tsq638	taf7-ts1	0.017
YLR172C	DPH5	YNL046W	YNL046W	0.017
YLR172C	DPH5	YNL270C	ALP1	0.017
YLR172C	DPH5	YOR002W	ALG6	0.017
YLR172C	DPH5	YOR368W	RAD17	0.017
YLR172C	DPH5	YPL071C	YPL071C	0.017
YLR172C	DPH5	YPL105C	SYH1	0.017
YLR172C	DPH5	YPL250C	ICY2	0.017
YLR172C	DPH5	YPR008W	HAA1	0.017
YLR172C	DPH5	YPR042C	PUF2	0.017
YLR172C	DPH5	YPR109W	YPR109W	0.017
YLR172C	DPH5	YBL065W	YBL065W	0.016
YLR172C	DPH5	YBL082C	ALG3	0.016
YLR172C	DPH5	YBL100C	YBL100C	0.016
YLR172C	DPH5	YBR090C-A	YBR090C-A	0.016
YLR172C	DPH5	YBR104W	YMC2	0.016
YLR172C	DPH5	YCL009C	ILV6	0.016
YLR172C	DPH5	YCR034W	FEN1	0.016
YLR172C	DPH5	YDL070W	BDF2	0.016
YLR172C	DPH5	YDL181W	INH1	0.016
YLR172C	DPH5	YDL197C	ASF2	0.016
YLR172C	DPH5	YDR059C	UBC5	0.016
YLR172C	DPH5	YDR206W	EBS1	0.016
YLR172C	DPH5	YDR262W	YDR262W	0.016
YLR172C	DPH5	YDR482C	CWC21	0.016
YLR172C	DPH5	YDR542W	PAU10	0.016
YLR172C	DPH5	YEL036C	ANP1	0.016
YLR172C	DPH5	YER008C	SEC3	0.016
YLR172C	DPH5	YER174C	GRX4	0.016
YLR172C	DPH5	YFL040W	YFL040W	0.016
YLR172C	DPH5	YGL071W	AFT1	0.016
YLR172C	DPH5	YGL100W	SEH1	0.016
YLR172C	DPH5	YGR234W	YHB1	0.016
YLR172C	DPH5	YHR028C	DAP2	0.016
YLR172C	DPH5	YHR093W	AHT1	0.016
YLR172C	DPH5	YHR117W	TOM71	0.016
YLR172C	DPH5	YIL050W	PCL7	0.016
YLR172C	DPH5	YIL113W	SDP1	0.016
YLR172C	DPH5	YJL141C	YAK1	0.016
YLR172C	DPH5	YJR075W	HOC1	0.016
YLR172C	DPH5	YKL212W	SAC1	0.016
YLR172C	DPH5	YKR048C	NAP1	0.016
YLR172C	DPH5	YKR082W	NUP133	0.016
YLR172C	DPH5	YLL052C	AQY2	0.016
YLR172C	DPH5	YLR151C	PCD1	0.016
YLR172C	DPH5	YLR416C	YLR416C	0.016
YLR172C	DPH5	YLR417W	VPS36	0.016
YLR172C	DPH5	YLR444C	YLR444C	0.016
YLR172C	DPH5	YML021C	UNG1	0.016
YLR172C	DPH5	YML052W	SUR7	0.016
YLR172C	DPH5	YMR111C	YMR111C	0.016
YLR172C	DPH5	YMR116C	ASC1	0.016
YLR172C	DPH5	YMR210W	YMR210W	0.016
YLR172C	DPH5	YMR214W	SCJ1	0.016
YLR172C	DPH5	YNL100W	AIM37	0.016
YLR172C	DPH5	YOL086C	ADH1	0.016
YLR172C	DPH5	YOR092W	ECM3	0.016
YLR172C	DPH5	YOR125C	CAT5	0.016
YLR172C	DPH5	YOR155C	ISN1	0.016
YLR172C	DPH5	YOR311C	DGK1	0.016
YLR172C	DPH5	YOR364W	YOR364W	0.016
YLR172C	DPH5	YPL092W	SSU1	0.016
YLR172C	DPH5	YPL114W	YPL114W	0.016
YLR172C	DPH5	YPL172C	COX10	0.016
YLR172C	DPH5	YPL223C	GRE1	0.016
YLR172C	DPH5	YPR024W	YME1	0.016
YLR172C	DPH5	YPR050C	YPR050C	0.016
YLR172C	DPH5	YBL084C_tsq92	cdc27-1	0.015
YLR172C	DPH5	YBR112C_damp	CYC8_damp	0.015
YLR172C	DPH5	YBR231C	SWC5	0.015
YLR172C	DPH5	YBR286W	APE3	0.015
YLR172C	DPH5	YCL022C	YCL022C	0.015
YLR172C	DPH5	YCR094W	CDC50	0.015
YLR172C	DPH5	YDL086W	YDL086W	0.015
YLR172C	DPH5	YDL224C	WHI4	0.015
YLR172C	DPH5	YDR074W	TPS2	0.015
YLR172C	DPH5	YDR147W	EKI1	0.015
YLR172C	DPH5	YDR160W_damp	SSY1_damp	0.015
YLR172C	DPH5	YDR369C	XRS2	0.015
YLR172C	DPH5	YDR479C	PEX29	0.015
YLR172C	DPH5	YDR525W	API2	0.015
YLR172C	DPH5	YEL003W	GIM4	0.015
YLR172C	DPH5	YGL042C	YGL042C	0.015
YLR172C	DPH5	YGL095C	VPS45	0.015
YLR172C	DPH5	YGR016W	YGR016W	0.015
YLR172C	DPH5	YGR153W	YGR153W	0.015
YLR172C	DPH5	YHR206W	SKN7	0.015
YLR172C	DPH5	YIL032C	YIL032C	0.015
YLR172C	DPH5	YIL159W	BNR1	0.015
YLR172C	DPH5	YIL163C	YIL163C	0.015
YLR172C	DPH5	YJL149W	DAS1	0.015
YLR172C	DPH5	YJR058C	APS2	0.015
YLR172C	DPH5	YKL128C	PMU1	0.015
YLR172C	DPH5	YKL151C	YKL151C	0.015
YLR172C	DPH5	YLL043W	FPS1	0.015
YLR172C	DPH5	YLR061W	RPL22A	0.015
YLR172C	DPH5	YLR068W	FYV7	0.015
YLR172C	DPH5	YLR232W	YLR232W	0.015
YLR172C	DPH5	YLR273C	PIG1	0.015
YLR172C	DPH5	YLR405W	DUS4	0.015
YLR172C	DPH5	YML047C	PRM6	0.015
YLR172C	DPH5	YML102W	CAC2	0.015
YLR172C	DPH5	YMR028W_tsq697	tap42-11	0.015
YLR172C	DPH5	YMR216C	SKY1	0.015
YLR172C	DPH5	YNL028W	YNL028W	0.015
YLR172C	DPH5	YNL121C	TOM70	0.015
YLR172C	DPH5	YOL032W	OPI10	0.015
YLR172C	DPH5	YOL073C	YOL073C	0.015
YLR172C	DPH5	YOL081W	IRA2	0.015
YLR172C	DPH5	YOL090W	MSH2	0.015
YLR172C	DPH5	YOL110W	SHR5	0.015
YLR172C	DPH5	YOL153C	YOL153C	0.015
YLR172C	DPH5	YOR069W	VPS5	0.015
YLR172C	DPH5	YOR091W	TMA46	0.015
YLR172C	DPH5	YOR249C_tsq746	apc5-CA	0.015
YLR172C	DPH5	YOR266W	PNT1	0.015
YLR172C	DPH5	YPL058C	PDR12	0.015
YLR172C	DPH5	YPL106C	SSE1	0.015
YLR172C	DPH5	YPL169C_tsq816	mex67-ts5	0.015
YLR172C	DPH5	YPL185W	YPL185W	0.015
YLR172C	DPH5	YPR040W	TIP41	0.015
YLR172C	DPH5	YPR054W	SMK1	0.015
YLR172C	DPH5	YPR091C	YPR091C	0.015
YLR172C	DPH5	YAL068C	PAU8	0.014
YLR172C	DPH5	YBR020W	GAL1	0.014
YLR172C	DPH5	YBR299W	MAL32	0.014
YLR172C	DPH5	YDL027C	YDL027C	0.014
YLR172C	DPH5	YDL112W	TRM3	0.014
YLR172C	DPH5	YDL192W	ARF1	0.014
YLR172C	DPH5	YDL240W	LRG1	0.014
YLR172C	DPH5	YDR139C	RUB1	0.014
YLR172C	DPH5	YDR169C	STB3	0.014
YLR172C	DPH5	YDR184C	ATC1	0.014
YLR172C	DPH5	YDR253C	MET32	0.014
YLR172C	DPH5	YDR297W	SUR2	0.014
YLR172C	DPH5	YDR331W_tsq371	gpi8-ts	0.014
YLR172C	DPH5	YDR516C	EMI2	0.014
YLR172C	DPH5	YEL006W	YEA6	0.014
YLR172C	DPH5	YER071C	YER071C	0.014
YLR172C	DPH5	YER179W	DMC1	0.014
YLR172C	DPH5	YFR028C_tsq416	cdc14-2	0.014
YLR172C	DPH5	YGL036W	YGL036W	0.014
YLR172C	DPH5	YGL082W	YGL082W	0.014
YLR172C	DPH5	YGL157W	YGL157W	0.014
YLR172C	DPH5	YGL208W	SIP2	0.014
YLR172C	DPH5	YGR009C_tsq60	sec9-4	0.014
YLR172C	DPH5	YGR201C	YGR201C	0.014
YLR172C	DPH5	YHR140W	YHR140W	0.014
YLR172C	DPH5	YHR165C	PRP8	0.014
YLR172C	DPH5	YHR184W	SSP1	0.014
YLR172C	DPH5	YKL020C	SPT23	0.014
YLR172C	DPH5	YKR075C	YKR075C	0.014
YLR172C	DPH5	YKR096W	ESL2	0.014
YLR172C	DPH5	YLR016C	PML1	0.014
YLR172C	DPH5	YLR121C	YPS3	0.014
YLR172C	DPH5	YLR185W	RPL37A	0.014
YLR172C	DPH5	YLR253W	YLR253W	0.014
YLR172C	DPH5	YLR309C	IMH1	0.014
YLR172C	DPH5	YLR440C_tsq726	sec39-2	0.014
YLR172C	DPH5	YLR441C	RPS1A	0.014
YLR172C	DPH5	YML009C	MRPL39	0.014
YLR172C	DPH5	YMR107W	SPG4	0.014
YLR172C	DPH5	YMR196W	YMR196W	0.014
YLR172C	DPH5	YMR294W	JNM1	0.014
YLR172C	DPH5	YNL199C	GCR2	0.014
YLR172C	DPH5	YNL257C	SIP3	0.014
YLR172C	DPH5	YOR231W	MKK1	0.014
YLR172C	DPH5	YPL197C	YPL197C	0.014
YLR172C	DPH5	YPL257W	YPL257W	0.014
YLR172C	DPH5	YPR090W	YPR090W	0.014
YLR172C	DPH5	YAL056W	GPB2	0.013
YLR172C	DPH5	YBL098W	BNA4	0.013
YLR172C	DPH5	YBR042C	CST26	0.013
YLR172C	DPH5	YBR207W	FTH1	0.013
YLR172C	DPH5	YCR091W	KIN82	0.013
YLR172C	DPH5	YDR419W	RAD30	0.013
YLR172C	DPH5	YDR504C	SPG3	0.013
YLR172C	DPH5	YER016W	BIM1	0.013
YLR172C	DPH5	YER067C-A	YER067C-A	0.013
YLR172C	DPH5	YER130C	COM2	0.013
YLR172C	DPH5	YER183C	FAU1	0.013
YLR172C	DPH5	YFL012W	YFL012W	0.013
YLR172C	DPH5	YGL002W	ERP6	0.013
YLR172C	DPH5	YGL138C	YGL138C	0.013
YLR172C	DPH5	YGL170C	SPO74	0.013
YLR172C	DPH5	YGL260W	YGL260W	0.013
YLR172C	DPH5	YGR113W_tsq243	dam1-9	0.013
YLR172C	DPH5	YGR134W	CAF130	0.013
YLR172C	DPH5	YHL006C	SHU1	0.013
YLR172C	DPH5	YHR163W	SOL3	0.013
YLR172C	DPH5	YJL085W	EXO70	0.013
YLR172C	DPH5	YJR095W	SFC1	0.013
YLR172C	DPH5	YKR017C	YKR017C	0.013
[truncated: 2,458 more rows]

## Sheet: DPH4 JJJ3
ORF1	Gene1	ORF2	Gene2	Correlation
YJR097W	DPH4	YKL191W	DPH2	0.316
YJR097W	DPH4	YIL103W	DPH1	0.3
YJR097W	DPH4	YER035W	EDC2	0.25
YJR097W	DPH4	YBR246W	YBR246W	0.234
YJR097W	DPH4	YLR143W	YLR143W	0.189
YJR097W	DPH4	YLR172C	DPH5	0.174
YJR097W	DPH4	YDR037W_damp	KRS1_damp	0.172
YJR097W	DPH4	YOR133W	EFT1	0.171
YJR097W	DPH4	YJR054W	ERM6	0.17
YJR097W	DPH4	YJR060W	CBF1	0.158
YJR097W	DPH4	YCR079W	PTC6	0.139
YJR097W	DPH4	YJR033C	RAV1	0.137
YJR097W	DPH4	YMR116C	ASC1	0.136
YJR097W	DPH4	YJR014W	TMA22	0.135
YJR097W	DPH4	YDR015C	YDR015C	0.134
YJR097W	DPH4	YDR155C	CPR1	0.131
YJR097W	DPH4	YDR430C	CYM1	0.131
YJR097W	DPH4	YGL014W	PUF4	0.13
YJR097W	DPH4	YJR117W	STE24	0.124
YJR097W	DPH4	YKR024C	DBP7	0.124
YJR097W	DPH4	YNL161W_damp	CBK1_damp	0.124
YJR097W	DPH4	YDR368W	YPR1	0.119
YJR097W	DPH4	YGL155W_tsq333	cdc43-2	0.119
YJR097W	DPH4	YLR153C_damp	ACS2_damp	0.118
YJR097W	DPH4	YJL007C	YJL007C	0.117
YJR097W	DPH4	YPL227C	ALG5	0.116
YJR097W	DPH4	YDR203W	YDR203W	0.115
YJR097W	DPH4	YGR236C	SPG1	0.115
YJR097W	DPH4	YOR298C-A	MBF1	0.114
YJR097W	DPH4	YER066W	YER066W	0.113
YJR097W	DPH4	YGL043W	DST1	0.113
YJR097W	DPH4	YGR227W	DIE2	0.113
YJR097W	DPH4	YOR243C	PUS7	0.113
YJR097W	DPH4	YBR055C_tsq455	prp6-1	0.112
YJR097W	DPH4	YDL053C	PBP4	0.112
YJR097W	DPH4	YMR080C	NAM7	0.112
YJR097W	DPH4	YDR349C	YPS7	0.111
YJR097W	DPH4	YOR021C	YOR021C	0.11
YJR097W	DPH4	YDR385W	EFT2	0.109
YJR097W	DPH4	YLR166C_tsq66	sec10-2	0.107
YJR097W	DPH4	YPL028W_tsq531	erg10-1	0.107
YJR097W	DPH4	YJR151C	DAN4	0.106
YJR097W	DPH4	YPL139C	UME1	0.106
YJR097W	DPH4	YBR110W_tsq177	alg1-1	0.105
YJR097W	DPH4	YGR052W	FMP48	0.105
YJR097W	DPH4	YHR121W	LSM12	0.105
YJR097W	DPH4	YGL042C	YGL042C	0.104
YJR097W	DPH4	YHR078W	YHR078W	0.104
YJR097W	DPH4	YER042W	MXR1	0.103
YJR097W	DPH4	YJL158C	CIS3	0.103
YJR097W	DPH4	YKL140W	TGL1	0.103
YJR097W	DPH4	YOL046C	YOL046C	0.103
YJR097W	DPH4	YHR039C-A	VMA10	0.102
YJR097W	DPH4	YMR173W	DDR48	0.102
YJR097W	DPH4	YOR284W	HUA2	0.102
YJR097W	DPH4	YOR384W	FRE5	0.102
YJR097W	DPH4	YDL203C	ACK1	0.1
YJR097W	DPH4	YPR157W	YPR157W	0.1
YJR097W	DPH4	YJL136C	RPS21B	0.099
YJR097W	DPH4	YMR004W	MVP1	0.099
YJR097W	DPH4	YDR445C	YDR445C	0.098
YJR097W	DPH4	YGR216C_tsq548	gpi1-1	0.098
YJR097W	DPH4	YKL137W	CMC1	0.098
YJR097W	DPH4	YOL017W	ESC8	0.098
YJR097W	DPH4	YPL022W	RAD1	0.098
YJR097W	DPH4	YPL066W	YPL066W	0.098
YJR097W	DPH4	YLR459W_tsq200	gab1-1	0.097
YJR097W	DPH4	YPL229W	YPL229W	0.097
YJR097W	DPH4	YBL071C	YBL071C	0.096
YJR097W	DPH4	YJL180C	ATP12	0.096
YJR097W	DPH4	YER135C	YER135C	0.095
YJR097W	DPH4	YHL023C	RMD11	0.095
YJR097W	DPH4	YJL203W_tsq401	prp21-ts	0.095
YJR097W	DPH4	YLR412W	BER1	0.095
YJR097W	DPH4	YOR293W	RPS10A	0.095
YJR097W	DPH4	YGR182C	YGR182C	0.094
YJR097W	DPH4	YJR045C_tsq328	ssc1-2	0.094
YJR097W	DPH4	YKR034W	DAL80	0.094
YJR097W	DPH4	YNL096C	RPS7B	0.094
YJR097W	DPH4	YOR379C	YOR379C	0.094
YJR097W	DPH4	YIR041W	PAU15	0.093
YJR097W	DPH4	YJL163C	YJL163C	0.093
YJR097W	DPH4	YKR019C	IRS4	0.093
YJR097W	DPH4	YLR360W	VPS38	0.093
YJR097W	DPH4	YGL203C	KEX1	0.092
YJR097W	DPH4	YIL077C	YIL077C	0.092
YJR097W	DPH4	YGR178C	PBP1	0.091
YJR097W	DPH4	YIL073C	SPO22	0.091
YJR097W	DPH4	YJR069C	HAM1	0.091
YJR097W	DPH4	YMR220W_tsq320	erg8-1	0.091
YJR097W	DPH4	YOL087C	DUF1	0.091
YJR097W	DPH4	YPL120W	VPS30	0.091
YJR097W	DPH4	YCR032W	BPH1	0.09
YJR097W	DPH4	YDR183W	PLP1	0.09
YJR097W	DPH4	YKR093W	PTR2	0.09
YJR097W	DPH4	YNL263C_damp	YIF1_damp	0.09
YJR097W	DPH4	YAL046C	AIM1	0.089
YJR097W	DPH4	YBR084W	MIS1	0.089
YJR097W	DPH4	YCL036W	GFD2	0.089
YJR097W	DPH4	YMR313C	TGL3	0.089
YJR097W	DPH4	YOR213C	SAS5	0.089
YJR097W	DPH4	YPR126C	YPR126C	0.089
YJR097W	DPH4	YPR153W	YPR153W	0.089
YJR097W	DPH4	YCR012W_damp	PGK1_damp	0.088
YJR097W	DPH4	YHR159W	YHR159W	0.088
YJR097W	DPH4	YOL162W	YOL162W	0.088
YJR097W	DPH4	YPL089C	RLM1	0.088
YJR097W	DPH4	YPR046W	MCM16	0.088
YJR097W	DPH4	YCL076W	YCL076W	0.087
YJR097W	DPH4	YDR309C	GIC2	0.087
YJR097W	DPH4	YDR359C	EAF1	0.087
YJR097W	DPH4	YER031C	YPT31	0.087
YJR097W	DPH4	YGL226C-A	OST5	0.087
YJR097W	DPH4	YHR117W	TOM71	0.087
YJR097W	DPH4	YJL037W	IRC18	0.087
YJR097W	DPH4	YJL141C	YAK1	0.087
YJR097W	DPH4	YLR443W	ECM7	0.087
YJR097W	DPH4	YAL025C_damp	MAK16_damp	0.086
YJR097W	DPH4	YBR229C	ROT2	0.086
YJR097W	DPH4	YPL051W	ARL3	0.086
YJR097W	DPH4	YDR395W	SXM1	0.085
YJR097W	DPH4	YGR079W	YGR079W	0.085
YJR097W	DPH4	YJL027C	YJL027C	0.085
YJR097W	DPH4	YJL124C	LSM1	0.085
YJR097W	DPH4	YJR015W	YJR015W	0.085
YJR097W	DPH4	YKL205W	LOS1	0.085
YJR097W	DPH4	YLR438C-A_damp	LSM3_damp	0.085
YJR097W	DPH4	YNL016W	PUB1	0.085
YJR097W	DPH4	YPL096C-A	ERI1	0.085
YJR097W	DPH4	YPR188C	MLC2	0.085
YJR097W	DPH4	YER140W	YER140W	0.084
YJR097W	DPH4	YGL084C	GUP1	0.084
YJR097W	DPH4	YGL221C	NIF3	0.084
YJR097W	DPH4	YML096W	YML096W	0.084
YJR097W	DPH4	YDL129W	YDL129W	0.083
YJR097W	DPH4	YIL162W	SUC2	0.083
YJR097W	DPH4	YJL053W	PEP8	0.083
YJR097W	DPH4	YJL079C	PRY1	0.083
YJR097W	DPH4	YLR432W	IMD3	0.083
YJR097W	DPH4	YER007C-A	TMA20	0.082
YJR097W	DPH4	YKL221W	MCH2	0.082
YJR097W	DPH4	YLR292C	SEC72	0.082
YJR097W	DPH4	YML027W	YOX1	0.082
YJR097W	DPH4	YNL290W_damp	RFC3_damp	0.082
YJR097W	DPH4	YOR193W	PEX27	0.082
YJR097W	DPH4	YBL082C	ALG3	0.081
YJR097W	DPH4	YBL083C	YBL083C	0.081
YJR097W	DPH4	YBL103C	RTG3	0.081
YJR097W	DPH4	YER112W_damp	LSM4_damp	0.081
YJR097W	DPH4	YGR097W	ASK10	0.081
YJR097W	DPH4	YGR238C	KEL2	0.081
YJR097W	DPH4	YKL185W	ASH1	0.081
YJR097W	DPH4	YCL028W	RNQ1	0.08
YJR097W	DPH4	YDL065C	PEX19	0.08
YJR097W	DPH4	YDR477W	SNF1	0.08
YJR097W	DPH4	YHR199C	AIM46	0.08
YJR097W	DPH4	YIL025C	YIL025C	0.08
YJR097W	DPH4	YIL123W	SIM1	0.08
YJR097W	DPH4	YLR369W	SSQ1	0.08
YJR097W	DPH4	YOR002W	ALG6	0.08
YJR097W	DPH4	YPL138C	SPP1	0.08
YJR097W	DPH4	YDR099W	BMH2	0.079
YJR097W	DPH4	YDR446W	ECM11	0.079
YJR097W	DPH4	YDR457W	TOM1	0.079
YJR097W	DPH4	YFR049W	YMR31	0.079
YJR097W	DPH4	YHR127W	YHR127W	0.079
YJR097W	DPH4	YKL106W	AAT1	0.079
YJR097W	DPH4	YLR008C_tsq501	pam18-1	0.079
YJR097W	DPH4	YLR447C	VMA6	0.079
YJR097W	DPH4	YOR121C	YOR121C	0.079
YJR097W	DPH4	YGR048W_tsq677	ufd1-2	0.078
YJR097W	DPH4	YHR038W	RRF1	0.078
YJR097W	DPH4	YIL054W	YIL054W	0.078
YJR097W	DPH4	YIL086C	YIL086C	0.078
YJR097W	DPH4	YLR047C	FRE8	0.078
YJR097W	DPH4	YMR155W	YMR155W	0.078
YJR097W	DPH4	YNL089C	YNL089C	0.078
YJR097W	DPH4	YPR083W	MDM36	0.078
YJR097W	DPH4	YBR107C	IML3	0.077
YJR097W	DPH4	YCR089W	FIG2	0.077
YJR097W	DPH4	YGL067W	NPY1	0.077
YJR097W	DPH4	YML123C	PHO84	0.077
YJR097W	DPH4	YNR030W	ALG12	0.077
YJR097W	DPH4	YOR038C	HIR2	0.077
YJR097W	DPH4	YPR189W	SKI3	0.077
YJR097W	DPH4	YGL132W	YGL132W	0.076
YJR097W	DPH4	YJR035W	RAD26	0.076
YJR097W	DPH4	YJR120W	YJR120W	0.076
YJR097W	DPH4	YLL055W	YCT1	0.076
YJR097W	DPH4	YNL080C	EOS1	0.076
YJR097W	DPH4	YOR232W_tsq505	mge1-100	0.076
YJR097W	DPH4	YPL207W	TYW1	0.076
YJR097W	DPH4	YPL270W	MDL2	0.076
YJR097W	DPH4	YDL157C	YDL157C	0.074
YJR097W	DPH4	YDR057W	YOS9	0.074
YJR097W	DPH4	YDR133C	YDR133C	0.074
YJR097W	DPH4	YER045C	ACA1	0.074
YJR097W	DPH4	YGL007W	BRP1	0.074
YJR097W	DPH4	YHL012W	YHL012W	0.074
YJR097W	DPH4	YJL012C	VTC4	0.074
YJR097W	DPH4	YJL171C	YJL171C	0.074
YJR097W	DPH4	YKL043W	PHD1	0.074
YJR097W	DPH4	YKR011C	YKR011C	0.074
YJR097W	DPH4	YKR090W	PXL1	0.074
YJR097W	DPH4	YLR370C	ARC18	0.074
YJR097W	DPH4	YPL224C	MMT2	0.074
YJR097W	DPH4	YBR006W	UGA2	0.073
YJR097W	DPH4	YER044C-A	MEI4	0.073
YJR097W	DPH4	YJL193W	YJL193W	0.073
YJR097W	DPH4	YML005W	TRM12	0.073
YJR097W	DPH4	YOR076C	SKI7	0.073
YJR097W	DPH4	YBL105C_tsq535	pkc1-ts	0.072
YJR097W	DPH4	YBR079C_damp	RPG1_damp	0.072
YJR097W	DPH4	YDL161W	ENT1	0.072
YJR097W	DPH4	YER166W	DNF1	0.072
YJR097W	DPH4	YIL030C	SSM4	0.072
YJR097W	DPH4	YIL088C	AVT7	0.072
YJR097W	DPH4	YJR040W	GEF1	0.072
YJR097W	DPH4	YOL112W	MSB4	0.072
YJR097W	DPH4	YOR211C	MGM1	0.072
YJR097W	DPH4	YPR051W	MAK3	0.072
YJR097W	DPH4	YAL020C	ATS1	0.071
YJR097W	DPH4	YDR181C	SAS4	0.071
YJR097W	DPH4	YIL029C	YIL029C	0.071
YJR097W	DPH4	YJL094C	KHA1	0.071
YJR097W	DPH4	YJL142C	IRC9	0.071
YJR097W	DPH4	YJR037W	YJR037W	0.071
YJR097W	DPH4	YKL123W	YKL123W	0.071
YJR097W	DPH4	YLR080W	EMP46	0.071
YJR097W	DPH4	YNR074C	AIF1	0.071
YJR097W	DPH4	YOR270C	VPH1	0.071
YJR097W	DPH4	YPL041C	YPL041C	0.071
YJR097W	DPH4	YBR080C_tsq57	sec18-1	0.07
YJR097W	DPH4	YGL256W	ADH4	0.07
YJR097W	DPH4	YGR077C	PEX8	0.07
YJR097W	DPH4	YIL072W	HOP1	0.07
YJR097W	DPH4	YJL122W	ALB1	0.07
YJR097W	DPH4	YLR381W	CTF3	0.07
YJR097W	DPH4	YMR035W	IMP2	0.07
YJR097W	DPH4	YFL054C	YFL054C	0.069
YJR097W	DPH4	YGL001C_tsq742	erg26-1	0.069
YJR097W	DPH4	YGL209W	MIG2	0.069
YJR097W	DPH4	YGR140W_tsq133	cbf2-1	0.069
YJR097W	DPH4	YHL034C	SBP1	0.069
YJR097W	DPH4	YHR021C	RPS27B	0.069
YJR097W	DPH4	YJL205C	NCE101	0.069
YJR097W	DPH4	YJR078W	BNA2	0.069
YJR097W	DPH4	YKL173W_tsq621	snu114-60	0.069
YJR097W	DPH4	YKL183W	LOT5	0.069
YJR097W	DPH4	YLR035C	MLH2	0.069
YJR097W	DPH4	YMR053C	STB2	0.069
YJR097W	DPH4	YNL028W	YNL028W	0.069
YJR097W	DPH4	YNL078W	NIS1	0.069
YJR097W	DPH4	YNL095C	YNL095C	0.069
YJR097W	DPH4	YNR073C	YNR073C	0.069
YJR097W	DPH4	YBR111W-A	SUS1	0.068
YJR097W	DPH4	YDL192W	ARF1	0.068
YJR097W	DPH4	YDR055W	PST1	0.068
YJR097W	DPH4	YER048C	CAJ1	0.068
YJR097W	DPH4	YER118C	SHO1	0.068
YJR097W	DPH4	YIL160C	POT1	0.068
YJR097W	DPH4	YJR096W	YJR096W	0.068
YJR097W	DPH4	YKR003W	OSH6	0.068
YJR097W	DPH4	YKR078W	YKR078W	0.068
YJR097W	DPH4	YML066C	SMA2	0.068
YJR097W	DPH4	YNL315C	ATP11	0.068
YJR097W	DPH4	YOL093W	TRM10	0.068
YJR097W	DPH4	YPR132W	RPS23B	0.068
YJR097W	DPH4	YAL007C	ERP2	0.067
YJR097W	DPH4	YCL024W	KCC4	0.067
YJR097W	DPH4	YDR216W	ADR1	0.067
YJR097W	DPH4	YDR243C_tsq574	prp28-101	0.067
YJR097W	DPH4	YDR326C	YSP2	0.067
YJR097W	DPH4	YDR508C	GNP1	0.067
YJR097W	DPH4	YGR151C	YGR151C	0.067
YJR097W	DPH4	YGR217W	CCH1	0.067
YJR097W	DPH4	YJL134W	LCB3	0.067
YJR097W	DPH4	YKL105C	YKL105C	0.067
YJR097W	DPH4	YLL050C_tsq234	cof1-5	0.067
YJR097W	DPH4	YLR056W	ERG3	0.067
YJR097W	DPH4	YLR315W	NKP2	0.067
YJR097W	DPH4	YNL001W	DOM34	0.067
YJR097W	DPH4	YNL090W	RHO2	0.067
YJR097W	DPH4	YOL137W	BSC6	0.067
YJR097W	DPH4	YOR335C_tsq908	ala1-1	0.067
YJR097W	DPH4	YDR026C	YDR026C	0.066
YJR097W	DPH4	YER100W	UBC6	0.066
YJR097W	DPH4	YER130C	COM2	0.066
YJR097W	DPH4	YHR097C	YHR097C	0.066
YJR097W	DPH4	YJR094C	IME1	0.066
YJR097W	DPH4	YLR039C	RIC1	0.066
YJR097W	DPH4	YML048W-A	YML048W-A	0.066
YJR097W	DPH4	YML095C	RAD10	0.066
YJR097W	DPH4	YML119W	YML119W	0.066
YJR097W	DPH4	YBR025C	OLA1	0.065
YJR097W	DPH4	YDR116C	MRPL1	0.065
YJR097W	DPH4	YGL053W	PRM8	0.065
YJR097W	DPH4	YIR023W	DAL81	0.065
YJR097W	DPH4	YJL013C	MAD3	0.065
YJR097W	DPH4	YJR076C_tsq74	cdc11-2	0.065
YJR097W	DPH4	YLR189C	ATG26	0.065
YJR097W	DPH4	YLR229C_tsq29	cdc42-1	0.065
YJR097W	DPH4	YLR450W	HMG2	0.065
YJR097W	DPH4	YPL032C	SVL3	0.065
YJR097W	DPH4	YBR042C	CST26	0.064
YJR097W	DPH4	YCL005W-A	VMA9	0.064
YJR097W	DPH4	YDR384C	ATO3	0.064
YJR097W	DPH4	YGR113W_tsq243	dam1-9	0.064
YJR097W	DPH4	YGR125W	YGR125W	0.064
YJR097W	DPH4	YGR138C	TPO2	0.064
YJR097W	DPH4	YHR048W	YHK8	0.064
YJR097W	DPH4	YIL033C	BCY1	0.064
YJR097W	DPH4	YIL064W	SEE1	0.064
YJR097W	DPH4	YLR082C	SRL2	0.064
YJR097W	DPH4	YNL064C	YDJ1	0.064
YJR097W	DPH4	YNL145W	MFA2	0.064
YJR097W	DPH4	YOL119C	MCH4	0.064
YJR097W	DPH4	YPR196W	YPR196W	0.064
YJR097W	DPH4	YBR207W	FTH1	0.063
YJR097W	DPH4	YDR024W	FYV1	0.063
YJR097W	DPH4	YFL032W	YFL032W	0.063
YJR097W	DPH4	YGL035C	MIG1	0.063
YJR097W	DPH4	YGL197W	MDS3	0.063
YJR097W	DPH4	YKL213C	DOA1	0.063
YJR097W	DPH4	YMR040W	YET2	0.063
YJR097W	DPH4	YOL002C	IZH2	0.063
YJR097W	DPH4	YOR167C	RPS28A	0.063
YJR097W	DPH4	YER105C	NUP157	0.062
YJR097W	DPH4	YHR113W	YHR113W	0.062
YJR097W	DPH4	YKL190W	CNB1	0.062
YJR097W	DPH4	YKL203C_tsq398	tor2-21	0.062
YJR097W	DPH4	YMR022W	UBC7	0.062
YJR097W	DPH4	YNL129W	NRK1	0.062
YJR097W	DPH4	YOL043C	NTG2	0.062
YJR097W	DPH4	YOL088C	MPD2	0.062
YJR097W	DPH4	YPR075C	OPY2	0.062
YJR097W	DPH4	YBL013W	FMT1	0.061
YJR097W	DPH4	YBR082C	UBC4	0.061
YJR097W	DPH4	YBR086C	IST2	0.061
YJR097W	DPH4	YDR011W	SNQ2	0.061
YJR097W	DPH4	YER177W	BMH1	0.061
YJR097W	DPH4	YGR110W	YGR110W	0.061
YJR097W	DPH4	YGR157W	CHO2	0.061
YJR097W	DPH4	YIL057C	RGI2	0.061
YJR097W	DPH4	YJR099W	YUH1	0.061
YJR097W	DPH4	YLR064W	YLR064W	0.061
YJR097W	DPH4	YMR087W	YMR087W	0.061
YJR097W	DPH4	YNL100W	AIM37	0.061
YJR097W	DPH4	YOL081W	IRA2	0.061
YJR097W	DPH4	YOR056C_damp	NOB1_damp	0.061
YJR097W	DPH4	YOR097C	YOR097C	0.061
YJR097W	DPH4	YPL018W	CTF19	0.061
YJR097W	DPH4	YBR013C	YBR013C	0.06
YJR097W	DPH4	YCR045C	YCR045C	0.06
YJR097W	DPH4	YDL017W_tsq131	cdc7-4	0.06
YJR097W	DPH4	YDL103C_tsq859	qri1-ts1	0.06
YJR097W	DPH4	YDR265W	PEX10	0.06
YJR097W	DPH4	YEL040W	UTR2	0.06
YJR097W	DPH4	YGR027C	RPS25A	0.06
YJR097W	DPH4	YGR106C	VOA1	0.06
YJR097W	DPH4	YJL004C	SYS1	0.06
YJR097W	DPH4	YJL212C	OPT1	0.06
YJR097W	DPH4	YLR094C	GIS3	0.06
YJR097W	DPH4	YLR184W	YLR184W	0.06
YJR097W	DPH4	YLR332W	MID2	0.06
YJR097W	DPH4	YML047C	PRM6	0.06
YJR097W	DPH4	YMR127C	SAS2	0.06
YJR097W	DPH4	YMR274C	RCE1	0.06
YJR097W	DPH4	YNR048W	YNR048W	0.06
YJR097W	DPH4	YAL029C	MYO4	0.059
YJR097W	DPH4	YAL058C-A	YAL058C-A	0.059
YJR097W	DPH4	YBR123C_tsq568	tfc1-E447K	0.059
YJR097W	DPH4	YBR221C	PDB1	0.059
YJR097W	DPH4	YBR281C	DUG2	0.059
YJR097W	DPH4	YCR102W-A	YCR102W-A	0.059
YJR097W	DPH4	YFR010W	UBP6	0.059
YJR097W	DPH4	YGL135W	RPL1B	0.059
YJR097W	DPH4	YGR011W	YGR011W	0.059
YJR097W	DPH4	YHR150W	PEX28	0.059
YJR097W	DPH4	YHR165C	PRP8	0.059
YJR097W	DPH4	YIL121W	QDR2	0.059
YJR097W	DPH4	YJR135C	MCM22	0.059
YJR097W	DPH4	YKL009W	MRT4	0.059
YJR097W	DPH4	YKL203C_tsq838	tor2-29	0.059
YJR097W	DPH4	YLR374C	YLR374C	0.059
YJR097W	DPH4	YML011C	RAD33	0.059
YJR097W	DPH4	YMR195W	ICY1	0.059
YJR097W	DPH4	YMR243C	ZRC1	0.059
YJR097W	DPH4	YNL307C	MCK1	0.059
YJR097W	DPH4	YOL086C	ADH1	0.059
YJR097W	DPH4	YOL155C	HPF1	0.059
YJR097W	DPH4	YPR096C	YPR096C	0.059
YJR097W	DPH4	YPR125W	YLH47	0.059
YJR097W	DPH4	YAR029W	YAR029W	0.058
YJR097W	DPH4	YCL001W	RER1	0.058
YJR097W	DPH4	YCR077C	PAT1	0.058
YJR097W	DPH4	YDR321W	ASP1	0.058
YJR097W	DPH4	YDR372C	VPS74	0.058
YJR097W	DPH4	YER175C	TMT1	0.058
YJR097W	DPH4	YGL010W	YGL010W	0.058
YJR097W	DPH4	YGL137W_tsq546	sec27-1	0.058
YJR097W	DPH4	YGR226C	YGR226C	0.058
YJR097W	DPH4	YGR250C	YGR250C	0.058
YJR097W	DPH4	YHR210C	YHR210C	0.058
YJR097W	DPH4	YKR089C	TGL4	0.058
YJR097W	DPH4	YLR177W	YLR177W	0.058
YJR097W	DPH4	YLR303W	MET17	0.058
YJR097W	DPH4	YMR165C	PAH1	0.058
YJR097W	DPH4	YMR207C	HFA1	0.058
YJR097W	DPH4	YNL044W	YIP3	0.058
YJR097W	DPH4	YOR008C-A	YOR008C-A	0.058
YJR097W	DPH4	YOR054C	VHS3	0.058
YJR097W	DPH4	YOR136W	IDH2	0.058
YJR097W	DPH4	YPR122W	AXL1	0.058
YJR097W	DPH4	YAL041W_tsq149	cdc24-4	0.057
YJR097W	DPH4	YAL054C	ACS1	0.057
YJR097W	DPH4	YBR012C	YBR012C	0.057
YJR097W	DPH4	YBR150C	TBS1	0.057
YJR097W	DPH4	YBR182C	SMP1	0.057
YJR097W	DPH4	YEL038W	UTR4	0.057
YJR097W	DPH4	YER113C	TMN3	0.057
YJR097W	DPH4	YHR146W	CRP1	0.057
YJR097W	DPH4	YIR007W	YIR007W	0.057
YJR097W	DPH4	YJR146W	YJR146W	0.057
YJR097W	DPH4	YKL081W	TEF4	0.057
YJR097W	DPH4	YLR364W	GRX8	0.057
YJR097W	DPH4	YLR421C	RPN13	0.057
YJR097W	DPH4	YML016C	PPZ1	0.057
YJR097W	DPH4	YMR027W	YMR027W	0.057
YJR097W	DPH4	YNL122C	YNL122C	0.057
YJR097W	DPH4	YNL270C	ALP1	0.057
YJR097W	DPH4	YOL042W	NGL1	0.057
YJR097W	DPH4	YOL077W-A	ATP19	0.057
YJR097W	DPH4	YPL258C	THI21	0.057
YJR097W	DPH4	YBL066C	SEF1	0.056
YJR097W	DPH4	YDL115C	IWR1	0.056
YJR097W	DPH4	YDR174W	HMO1	0.056
YJR097W	DPH4	YDR229W	IVY1	0.056
YJR097W	DPH4	YDR371W	CTS2	0.056
YJR097W	DPH4	YER019C-A	SBH2	0.056
YJR097W	DPH4	YER156C	YER156C	0.056
YJR097W	DPH4	YIL052C	RPL34B	0.056
YJR097W	DPH4	YIL150C_tsq110	mcm10-1	0.056
YJR097W	DPH4	YKL077W	YKL077W	0.056
YJR097W	DPH4	YKL212W	SAC1	0.056
YJR097W	DPH4	YLR207W	HRD3	0.056
YJR097W	DPH4	YLR311C	YLR311C	0.056
YJR097W	DPH4	YLR393W	ATP10	0.056
YJR097W	DPH4	YLR460C	YLR460C	0.056
YJR097W	DPH4	YNL253W	TEX1	0.056
YJR097W	DPH4	YOL013C	HRD1	0.056
YJR097W	DPH4	YPL164C	MLH3	0.056
YJR097W	DPH4	YBR295W	PCA1	0.055
YJR097W	DPH4	YDL017W_tsq880	cdc7-1	0.055
YJR097W	DPH4	YDR305C	HNT2	0.055
YJR097W	DPH4	YEL030W_damp	ECM10_damp	0.055
YJR097W	DPH4	YGL228W	SHE10	0.055
YJR097W	DPH4	YGR274C_tsq524	taf1-1	0.055
YJR097W	DPH4	YHL017W	YHL017W	0.055
YJR097W	DPH4	YHL021C	AIM17	0.055
YJR097W	DPH4	YHR133C	NSG1	0.055
YJR097W	DPH4	YHR181W	SVP26	0.055
YJR097W	DPH4	YIL096C	YIL096C	0.055
YJR097W	DPH4	YIL137C	TMA108	0.055
YJR097W	DPH4	YJL166W_damp	QCR8_damp	0.055
YJR097W	DPH4	YKL010C	UFD4	0.055
YJR097W	DPH4	YKR035W-A	DID2	0.055
YJR097W	DPH4	YML037C	YML037C	0.055
YJR097W	DPH4	YOL063C	CRT10	0.055
YJR097W	DPH4	YOR105W	YOR105W	0.055
YJR097W	DPH4	YAL021C	CCR4	0.054
YJR097W	DPH4	YDL011C	YDL011C	0.054
YJR097W	DPH4	YDL012C	YDL012C	0.054
YJR097W	DPH4	YEL057C	YEL057C	0.054
YJR097W	DPH4	YIL145C	PAN6	0.054
YJR097W	DPH4	YIR013C	GAT4	0.054
YJR097W	DPH4	YJL146W	IDS2	0.054
YJR097W	DPH4	YJL154C	VPS35	0.054
YJR097W	DPH4	YKL167C	MRP49	0.054
YJR097W	DPH4	YKR021W	ALY1	0.054
YJR097W	DPH4	YKR045C	YKR045C	0.054
YJR097W	DPH4	YLR194C	YLR194C	0.054
YJR097W	DPH4	YMR063W	RIM9	0.054
YJR097W	DPH4	YMR275C	BUL1	0.054
YJR097W	DPH4	YNL264C	PDR17	0.054
YJR097W	DPH4	YOR066W	MSA1	0.054
YJR097W	DPH4	YBR020W	GAL1	0.053
YJR097W	DPH4	YBR083W	TEC1	0.053
YJR097W	DPH4	YBR108W	AIM3	0.053
YJR097W	DPH4	YBR158W	AMN1	0.053
YJR097W	DPH4	YBR164C	ARL1	0.053
YJR097W	DPH4	YBR297W	MAL33	0.053
YJR097W	DPH4	YCR049C	YCR049C	0.053
YJR097W	DPH4	YCR050C	YCR050C	0.053
YJR097W	DPH4	YDL212W_damp	SHR3_damp	0.053
YJR097W	DPH4	YDR108W	GSG1	0.053
YJR097W	DPH4	YDR354W	TRP4	0.053
YJR097W	DPH4	YFR024C-A	LSB3	0.053
YJR097W	DPH4	YGR107W	YGR107W	0.053
YJR097W	DPH4	YIL117C	PRM5	0.053
YJR097W	DPH4	YJL050W_tsq431	mtr4-1	0.053
YJR097W	DPH4	YJR058C	APS2	0.053
YJR097W	DPH4	YKL193C_tsq572	sds22-5	0.053
YJR097W	DPH4	YLR295C	ATP14	0.053
YJR097W	DPH4	YML021C	UNG1	0.053
YJR097W	DPH4	YNL289W	PCL1	0.053
YJR097W	DPH4	YAL056W	GPB2	0.052
YJR097W	DPH4	YBR104W	YMC2	0.052
YJR097W	DPH4	YBR274W	CHK1	0.052
YJR097W	DPH4	YCL008C	STP22	0.052
YJR097W	DPH4	YCL062W	YCL062W	0.052
YJR097W	DPH4	YCL063W	VAC17	0.052
YJR097W	DPH4	YDR126W	SWF1	0.052
YJR097W	DPH4	YFR036W_tsq91	cdc26-1	0.052
YJR097W	DPH4	YGL232W	TAN1	0.052
YJR097W	DPH4	YGR130C	YGR130C	0.052
YJR097W	DPH4	YGR210C	YGR210C	0.052
YJR097W	DPH4	YHL030W	ECM29	0.052
YJR097W	DPH4	YJL130C	URA2	0.052
YJR097W	DPH4	YJL213W	YJL213W	0.052
YJR097W	DPH4	YKR095W	MLP1	0.052
YJR097W	DPH4	YKR106W	YKR106W	0.052
YJR097W	DPH4	YLR104W	YLR104W	0.052
YJR097W	DPH4	YMR010W	YMR010W	0.052
YJR097W	DPH4	YOL108C	INO4	0.052
YJR097W	DPH4	YOR012W	YOR012W	0.052
YJR097W	DPH4	YOR363C	PIP2	0.052
YJR097W	DPH4	YDR077W	SED1	0.051
YJR097W	DPH4	YFL020C	PAU5	0.051
YJR097W	DPH4	YGL158W	RCK1	0.051
YJR097W	DPH4	YGL173C	KEM1	0.051
YJR097W	DPH4	YGL184C	STR3	0.051
YJR097W	DPH4	YHL047C	ARN2	0.051
YJR097W	DPH4	YHR156C	LIN1	0.051
YJR097W	DPH4	YIR001C	SGN1	0.051
YJR097W	DPH4	YJR118C	ILM1	0.051
YJR097W	DPH4	YLR070C	XYL2	0.051
YJR097W	DPH4	YML130C_tsq203	ero1-1	0.051
YJR097W	DPH4	YMR099C	YMR099C	0.051
YJR097W	DPH4	YMR241W	YHM2	0.051
YJR097W	DPH4	YNL009W	IDP3	0.051
YJR097W	DPH4	YOL013W-A	YOL013W-A	0.051
YJR097W	DPH4	YOL084W	PHM7	0.051
YJR097W	DPH4	YPR178W_tsq819	prp4-ts	0.051
YJR097W	DPH4	YBL061C	SKT5	0.05
YJR097W	DPH4	YBL081W	YBL081W	0.05
YJR097W	DPH4	YBR161W	CSH1	0.05
YJR097W	DPH4	YDR073W	SNF11	0.05
YJR097W	DPH4	YGL004C	RPN14	0.05
YJR097W	DPH4	YGL183C	MND1	0.05
YJR097W	DPH4	YGR028W	MSP1	0.05
YJR097W	DPH4	YGR184C	UBR1	0.05
YJR097W	DPH4	YHR178W	STB5	0.05
YJR097W	DPH4	YIL098C	FMC1	0.05
YJR097W	DPH4	YIR020W-B	YIR020W-B	0.05
YJR097W	DPH4	YJL117W	PHO86	0.05
YJR097W	DPH4	YMR148W	YMR148W	0.05
YJR097W	DPH4	YNL140C	YNL140C	0.05
YJR097W	DPH4	YOL104C	NDJ1	0.05
YJR097W	DPH4	YOR126C	IAH1	0.05
YJR097W	DPH4	YPL233W_tsq450	nsl1-5	0.05
YJR097W	DPH4	YBL084C_tsq92	cdc27-1	0.049
YJR097W	DPH4	YBL106C	SRO77	0.049
YJR097W	DPH4	YDL241W	YDL241W	0.049
YJR097W	DPH4	YDR294C	DPL1	0.049
YJR097W	DPH4	YER093C_tsq658	tsc11-1	0.049
YJR097W	DPH4	YER108C	YER108C	0.049
YJR097W	DPH4	YER121W	YER121W	0.049
YJR097W	DPH4	YER137C	YER137C	0.049
YJR097W	DPH4	YER183C	FAU1	0.049
YJR097W	DPH4	YGL041C	YGL041C	0.049
YJR097W	DPH4	YGL233W_tsq43	sec15-1	0.049
YJR097W	DPH4	YGL259W	YPS5	0.049
YJR097W	DPH4	YGR146C	YGR146C	0.049
YJR097W	DPH4	YHR007C_tsq14	erg11-td	0.049
YJR097W	DPH4	YHR103W	SBE22	0.049
YJR097W	DPH4	YJL129C_damp	TRK1_damp	0.049
YJR097W	DPH4	YJL197W	UBP12	0.049
YJR097W	DPH4	YJR084W	CSN12	0.049
YJR097W	DPH4	YKL147C	YKL147C	0.049
YJR097W	DPH4	YKR035C	OPI8	0.049
YJR097W	DPH4	YLR363C	NMD4	0.049
YJR097W	DPH4	YLR444C	YLR444C	0.049
YJR097W	DPH4	YNL199C	GCR2	0.049
YJR097W	DPH4	YPR060C	ARO7	0.049
YJR097W	DPH4	YBR129C	OPY1	0.048
YJR097W	DPH4	YDL058W_tsq441	uso1-1	0.048
YJR097W	DPH4	YDR035W	ARO3	0.048
YJR097W	DPH4	YDR069C_damp	DOA4_damp	0.048
YJR097W	DPH4	YDR202C	RAV2	0.048
YJR097W	DPH4	YGL109W	YGL109W	0.048
YJR097W	DPH4	YGR286C	BIO2	0.048
YJR097W	DPH4	YHR182W	YHR182W	0.048
YJR097W	DPH4	YIL132C	CSM2	0.048
YJR097W	DPH4	YJL119C	YJL119C	0.048
YJR097W	DPH4	YJL121C	RPE1	0.048
YJR097W	DPH4	YJR091C	JSN1	0.048
YJR097W	DPH4	YJR130C	STR2	0.048
YJR097W	DPH4	YKL047W	ANR2	0.048
YJR097W	DPH4	YKL062W	MSN4	0.048
YJR097W	DPH4	YKL080W	VMA5	0.048
YJR097W	DPH4	YKL202W	YKL202W	0.048
YJR097W	DPH4	YLR373C	VID22	0.048
YJR097W	DPH4	YMR259C	YMR259C	0.048
YJR097W	DPH4	YNL022C	YNL022C	0.048
YJR097W	DPH4	YNL135C	FPR1	0.048
YJR097W	DPH4	YOL003C	PFA4	0.048
YJR097W	DPH4	YOR371C	GPB1	0.048
YJR097W	DPH4	YPL036W	PMA2	0.048
YJR097W	DPH4	YPL223C	GRE1	0.048
YJR097W	DPH4	YPL244C	HUT1	0.048
YJR097W	DPH4	YPR101W	SNT309	0.048
YJR097W	DPH4	YAL051W	OAF1	0.047
YJR097W	DPH4	YBL051C	PIN4	0.047
YJR097W	DPH4	YBL098W	BNA4	0.047
YJR097W	DPH4	YDL186W	YDL186W	0.047
YJR097W	DPH4	YDR137W	RGP1	0.047
YJR097W	DPH4	YDR402C	DIT2	0.047
YJR097W	DPH4	YFR040W	SAP155	0.047
YJR097W	DPH4	YGL036W	YGL036W	0.047
YJR097W	DPH4	YGL133W	ITC1	0.047
YJR097W	DPH4	YHL046C	PAU13	0.047
YJR097W	DPH4	YHR015W	MIP6	0.047
YJR097W	DPH4	YIL102C	YIL102C	0.047
YJR097W	DPH4	YJL110C	GZF3	0.047
YJR097W	DPH4	YJR115W	YJR115W	0.047
YJR097W	DPH4	YKL057C	NUP120	0.047
YJR097W	DPH4	YLL043W	FPS1	0.047
YJR097W	DPH4	YLR357W	RSC2	0.047
YJR097W	DPH4	YLR372W	SUR4	0.047
YJR097W	DPH4	YLR391W	YLR391W	0.047
YJR097W	DPH4	YOR109W	INP53	0.047
YJR097W	DPH4	YPL033C	SRL4	0.047
YJR097W	DPH4	YPL060W	LPE10	0.047
YJR097W	DPH4	YPL181W	CTI6	0.047
YJR097W	DPH4	YPL183C	RTT10	0.047
YJR097W	DPH4	YBR037C	SCO1	0.046
YJR097W	DPH4	YDL184C	RPL41A	0.046
YJR097W	DPH4	YDR005C	MAF1	0.046
YJR097W	DPH4	YDR068W	DOS2	0.046
YJR097W	DPH4	YDR120C	TRM1	0.046
YJR097W	DPH4	YDR147W	EKI1	0.046
YJR097W	DPH4	YDR245W	MNN10	0.046
YJR097W	DPH4	YDR507C	GIN4	0.046
YJR097W	DPH4	YDR518W	EUG1	0.046
YJR097W	DPH4	YER064C	YER064C	0.046
YJR097W	DPH4	YGL110C	CUE3	0.046
YJR097W	DPH4	YGL114W	YGL114W	0.046
YJR097W	DPH4	YHR167W	THP2	0.046
YJR097W	DPH4	YIL048W_tsq188	neo1-2	0.046
YJR097W	DPH4	YIR037W	HYR1	0.046
YJR097W	DPH4	YKL151C	YKL151C	0.046
YJR097W	DPH4	YKR094C	RPL40B	0.046
YJR097W	DPH4	YLL032C	YLL032C	0.046
YJR097W	DPH4	YMR083W	ADH3	0.046
YJR097W	DPH4	YOL047C	YOL047C	0.046
YJR097W	DPH4	YOL103W	ITR2	0.046
YJR097W	DPH4	YOR175C	ALE1	0.046
YJR097W	DPH4	YPL090C	RPS6A	0.046
YJR097W	DPH4	YPL161C	BEM4	0.046
YJR097W	DPH4	YDR197W	CBS2	0.045
YJR097W	DPH4	YDR415C	YDR415C	0.045
YJR097W	DPH4	YDR463W	STP1	0.045
YJR097W	DPH4	YFL049W	SWP82	0.045
YJR097W	DPH4	YGL161C	YIP5	0.045
YJR097W	DPH4	YHR092C	HXT4	0.045
YJR097W	DPH4	YHR136C	SPL2	0.045
YJR097W	DPH4	YIL051C_damp	MMF1_damp	0.045
YJR097W	DPH4	YJL091C_tsq655	gwt1-20	0.045
YJR097W	DPH4	YLL005C	SPO75	0.045
YJR097W	DPH4	YLR396C	VPS33	0.045
YJR097W	DPH4	YML060W	OGG1	0.045
YJR097W	DPH4	YNR049C	MSO1	0.045
YJR097W	DPH4	YOL101C	IZH4	0.045
YJR097W	DPH4	YOR053W	YOR053W	0.045
YJR097W	DPH4	YPL086C	ELP3	0.045
YJR097W	DPH4	YPL114W	YPL114W	0.045
YJR097W	DPH4	YBR019C	GAL10	0.044
YJR097W	DPH4	YBR261C	TAE1	0.044
YJR097W	DPH4	YCR030C	SYP1	0.044
YJR097W	DPH4	YDL051W	LHP1	0.044
YJR097W	DPH4	YDR525W	API2	0.044
YJR097W	DPH4	YGL160W	AIM14	0.044
YJR097W	DPH4	YGR099W_tsq604	tel2-7	0.044
YJR097W	DPH4	YGR187C	HGH1	0.044
YJR097W	DPH4	YGR212W	SLI1	0.044
YJR097W	DPH4	YIL166C	YIL166C	0.044
YJR097W	DPH4	YKL017C	HCS1	0.044
YJR097W	DPH4	YLL012W	YEH1	0.044
YJR097W	DPH4	YML072C	TCB3	0.044
YJR097W	DPH4	YNL032W	SIW14	0.044
YJR097W	DPH4	YNR058W	BIO3	0.044
YJR097W	DPH4	YNR071C	YNR071C	0.044
YJR097W	DPH4	YOR068C	VAM10	0.044
YJR097W	DPH4	YOR196C	LIP5	0.044
YJR097W	DPH4	YOR283W	YOR283W	0.044
YJR097W	DPH4	YPL112C	PEX25	0.044
YJR097W	DPH4	YPR004C	AIM45	0.044
YJR097W	DPH4	YPR076W	YPR076W	0.044
YJR097W	DPH4	YBR169C	SSE2	0.043
YJR097W	DPH4	YDL080C	THI3	0.043
YJR097W	DPH4	YDR100W	TVP15	0.043
YJR097W	DPH4	YDR233C	RTN1	0.043
YJR097W	DPH4	YDR254W	CHL4	0.043
YJR097W	DPH4	YDR344C	YDR344C	0.043
YJR097W	DPH4	YDR539W	YDR539W	0.043
YJR097W	DPH4	YER081W	SER3	0.043
YJR097W	DPH4	YFL011W	HXT10	0.043
YJR097W	DPH4	YGL196W	DSD1	0.043
YJR097W	DPH4	YIL152W	YIL152W	0.043
YJR097W	DPH4	YJR137C	ECM17	0.043
YJR097W	DPH4	YKL157W	APE2	0.043
YJR097W	DPH4	YLR072W	YLR072W	0.043
YJR097W	DPH4	YLR219W	MSC3	0.043
YJR097W	DPH4	YMR219W	ESC1	0.043
YJR097W	DPH4	YMR295C	IBI2	0.043
YJR097W	DPH4	YOL018C	TLG2	0.043
YJR097W	DPH4	YOL105C	WSC3	0.043
YJR097W	DPH4	YOR132W	VPS17	0.043
YJR097W	DPH4	YOR183W	FYV12	0.043
YJR097W	DPH4	YPL034W	YPL034W	0.043
YJR097W	DPH4	YBR178W	YBR178W	0.042
YJR097W	DPH4	YBR200W	BEM1	0.042
YJR097W	DPH4	YBR245C	ISW1	0.042
YJR097W	DPH4	YDL095W	PMT1	0.042
YJR097W	DPH4	YDR163W	CWC15	0.042
YJR097W	DPH4	YDR444W	YDR444W	0.042
YJR097W	DPH4	YER078C	ICP55	0.042
YJR097W	DPH4	YGL094C	PAN2	0.042
YJR097W	DPH4	YGL121C	GPG1	0.042
YJR097W	DPH4	YGL141W	HUL5	0.042
YJR097W	DPH4	YHR001W-A	QCR10	0.042
YJR097W	DPH4	YHR163W	SOL3	0.042
YJR097W	DPH4	YHR193C	EGD2	0.042
YJR097W	DPH4	YKR010C	TOF2	0.042
YJR097W	DPH4	YKR086W_tsq644	prp16-ts	0.042
YJR097W	DPH4	YLR260W	LCB5	0.042
YJR097W	DPH4	YLR357W_damp	RSC2_damp	0.042
YJR097W	DPH4	YLR407W	YLR407W	0.042
YJR097W	DPH4	YMR162C	DNF3	0.042
YJR097W	DPH4	YNL040W	YNL040W	0.042
YJR097W	DPH4	YNL057W	YNL057W	0.042
YJR097W	DPH4	YNR042W	YNR042W	0.042
YJR097W	DPH4	YOR047C	STD1	0.042
YJR097W	DPH4	YOR051C	YOR051C	0.042
YJR097W	DPH4	YOR129C	AFI1	0.042
YJR097W	DPH4	YOR195W	SLK19	0.042
YJR097W	DPH4	YPL250C	ICY2	0.042
YJR097W	DPH4	YAL010C	MDM10	0.041
YJR097W	DPH4	YBL050W_tsq48	sec17-1	0.041
YJR097W	DPH4	YBR269C	FMP21	0.041
YJR097W	DPH4	YCL029C	BIK1	0.041
YJR097W	DPH4	YDR315C	IPK1	0.041
YJR097W	DPH4	YDR509W	YDR509W	0.041
YJR097W	DPH4	YEL020C	YEL020C	0.041
YJR097W	DPH4	YGR006W_tsq434	prp18-ts	0.041
YJR097W	DPH4	YGR129W	SYF2	0.041
YJR097W	DPH4	YGR247W	CPD1	0.041
YJR097W	DPH4	YGR284C	ERV29	0.041
YJR097W	DPH4	YJR062C	NTA1	0.041
YJR097W	DPH4	YKL218C	SRY1	0.041
YJR097W	DPH4	YLL026W	HSP104	0.041
YJR097W	DPH4	YML109W	ZDS2	0.041
YJR097W	DPH4	YMR019W	STB4	0.041
YJR097W	DPH4	YMR085W	YMR085W	0.041
YJR097W	DPH4	YNR075W	COS10	0.041
YJR097W	DPH4	YOR383C	FIT3	0.041
YJR097W	DPH4	YOR386W	PHR1	0.041
YJR097W	DPH4	YPL072W	UBP16	0.041
YJR097W	DPH4	YAL031C	GIP4	0.04
YJR097W	DPH4	YBR073W	RDH54	0.04
YJR097W	DPH4	YDL054C	MCH1	0.04
YJR097W	DPH4	YDR333C	YDR333C	0.04
YJR097W	DPH4	YDR351W	SBE2	0.04
YJR097W	DPH4	YDR383C	NKP1	0.04
YJR097W	DPH4	YEL051W	VMA8	0.04
YJR097W	DPH4	YGL242C	YGL242C	0.04
YJR097W	DPH4	YGR066C	YGR066C	0.04
YJR097W	DPH4	YIL076W	SEC28	0.04
YJR097W	DPH4	YIL134W	FLX1	0.04
YJR097W	DPH4	YIL167W	SDL1	0.04
YJR097W	DPH4	YIR016W	YIR016W	0.04
YJR097W	DPH4	YJL166W	QCR8	0.04
YJR097W	DPH4	YJL183W	MNN11	0.04
YJR097W	DPH4	YJL211C	YJL211C	0.04
YJR097W	DPH4	YJL216C	YJL216C	0.04
YJR097W	DPH4	YJR108W	ABM1	0.04
YJR097W	DPH4	YJR127C	RSF2	0.04
YJR097W	DPH4	YKL040C	NFU1	0.04
YJR097W	DPH4	YKR104W	YKR104W	0.04
YJR097W	DPH4	YLR281C	YLR281C	0.04
YJR097W	DPH4	YLR387C	REH1	0.04
YJR097W	DPH4	YMR120C	ADE17	0.04
YJR097W	DPH4	YOL055C	THI20	0.04
YJR097W	DPH4	YOR031W	CRS5	0.04
YJR097W	DPH4	YOR304C-A	YOR304C-A	0.04
YJR097W	DPH4	YPL017C	IRC15	0.04
YJR097W	DPH4	YPL061W	ALD6	0.04
YJR097W	DPH4	YBL065W	YBL065W	0.039
YJR097W	DPH4	YBR066C	NRG2	0.039
YJR097W	DPH4	YBR111C	YSA1	0.039
YJR097W	DPH4	YBR145W	ADH5	0.039
YJR097W	DPH4	YBR259W	YBR259W	0.039
YJR097W	DPH4	YCR024C-A	PMP1	0.039
YJR097W	DPH4	YCR094W	CDC50	0.039
YJR097W	DPH4	YDR095C	YDR095C	0.039
YJR097W	DPH4	YDR110W	FOB1	0.039
YJR097W	DPH4	YDR506C	YDR506C	0.039
YJR097W	DPH4	YFL030W	AGX1	0.039
YJR097W	DPH4	YFR011C	AIM13	0.039
YJR097W	DPH4	YFR021W	ATG18	0.039
YJR097W	DPH4	YGL153W	PEX14	0.039
YJR097W	DPH4	YHL009C	YAP3	0.039
YJR097W	DPH4	YHR077C	NMD2	0.039
YJR097W	DPH4	YJL123C	MTC1	0.039
YJR097W	DPH4	YJL176C	SWI3	0.039
YJR097W	DPH4	YKL162C	YKL162C	0.039
YJR097W	DPH4	YKL214C	YRA2	0.039
YJR097W	DPH4	YLL039C	UBI4	0.039
YJR097W	DPH4	YLR348C	DIC1	0.039
YJR097W	DPH4	YLR410W	VIP1	0.039
YJR097W	DPH4	YML100W	TSL1	0.039
YJR097W	DPH4	YNR013C	PHO91	0.039
YJR097W	DPH4	YOR058C	ASE1	0.039
YJR097W	DPH4	YOR326W_tsq337	myo2-16	0.039
YJR097W	DPH4	YPR178W_tsq500	prp4-1	0.039
YJR097W	DPH4	YBR015C	MNN2	0.038
YJR097W	DPH4	YCR068W	ATG15	0.038
YJR097W	DPH4	YDL119C	YDL119C	0.038
YJR097W	DPH4	YDR132C	YDR132C	0.038
YJR097W	DPH4	YDR261C	EXG2	0.038
YJR097W	DPH4	YDR291W	HRQ1	0.038
YJR097W	DPH4	YER150W	SPI1	0.038
YJR097W	DPH4	YFL039C_tsq140	act1-125	0.038
YJR097W	DPH4	YGL089C	MF(ALPHA)2	0.038
YJR097W	DPH4	YGL211W	NCS6	0.038
YJR097W	DPH4	YGR021W	YGR021W	0.038
YJR097W	DPH4	YGR120C_tsq187	cog2-1	0.038
YJR097W	DPH4	YGR154C	GTO1	0.038
YJR097W	DPH4	YHL020C	OPI1	0.038
YJR097W	DPH4	YHL039W	YHL039W	0.038
YJR097W	DPH4	YHR064C	SSZ1	0.038
YJR097W	DPH4	YHR105W	YPT35	0.038
YJR097W	DPH4	YHR157W	REC104	0.038
YJR097W	DPH4	YIR033W	MGA2	0.038
YJR097W	DPH4	YJL002C_tsq735	ost1-6	0.038
YJR097W	DPH4	YJL161W	FMP33	0.038
YJR097W	DPH4	YJL172W	CPS1	0.038
YJR097W	DPH4	YKR080W	MTD1	0.038
YJR097W	DPH4	YLL041C	SDH2	0.038
YJR097W	DPH4	YLR136C	TIS11	0.038
YJR097W	DPH4	YMR060C	SAM37	0.038
YJR097W	DPH4	YNL008C	ASI3	0.038
YJR097W	DPH4	YNL041C	COG6	0.038
YJR097W	DPH4	YNL071W	LAT1	0.038
YJR097W	DPH4	YOR032C	HMS1	0.038
YJR097W	DPH4	YPL213W	LEA1	0.038
YJR097W	DPH4	YPR026W	ATH1	0.038
YJR097W	DPH4	YPR093C	ASR1	0.038
YJR097W	DPH4	YPR120C	CLB5	0.038
YJR097W	DPH4	YAR031W	PRM9	0.037
YJR097W	DPH4	YBL105C_tsq539	pkc1-4	0.037
YJR097W	DPH4	YBR001C	NTH2	0.037
YJR097W	DPH4	YCL023C	YCL023C	0.037
YJR097W	DPH4	YDL007W_damp	RPT2_damp	0.037
YJR097W	DPH4	YDL100C	GET3	0.037
YJR097W	DPH4	YDR052C_tsq163	dbf4-3	0.037
YJR097W	DPH4	YDR329C	PEX3	0.037
YJR097W	DPH4	YDR420W	HKR1	0.037
YJR097W	DPH4	YER067C-A	YER067C-A	0.037
YJR097W	DPH4	YGR058W	PEF1	0.037
YJR097W	DPH4	YGR071C	YGR071C	0.037
YJR097W	DPH4	YGR143W	SKN1	0.037
YJR097W	DPH4	YGR149W	YGR149W	0.037
YJR097W	DPH4	YGR285C	ZUO1	0.037
YJR097W	DPH4	YHR107C_tsq33	cdc12-1	0.037
YJR097W	DPH4	YIL008W	URM1	0.037
YJR097W	DPH4	YJL059W	YHC3	0.037
YJR097W	DPH4	YJR095W	SFC1	0.037
YJR097W	DPH4	YKL127W	PGM1	0.037
YJR097W	DPH4	YLL028W	TPO1	0.037
YJR097W	DPH4	YLR144C	ACF2	0.037
YJR097W	DPH4	YLR371W	ROM2	0.037
YJR097W	DPH4	YMR291W	YMR291W	0.037
YJR097W	DPH4	YOL020W	TAT2	0.037
YJR097W	DPH4	YOL073C	YOL073C	0.037
YJR097W	DPH4	YOR016C	ERP4	0.037
YJR097W	DPH4	YPR185W	ATG13	0.037
YJR097W	DPH4	YAL055W	PEX22	0.036
YJR097W	DPH4	YAL064C-A	YAL064C-A	0.036
YJR097W	DPH4	YBL107C	YBL107C	0.036
YJR097W	DPH4	YBR139W	YBR139W	0.036
YJR097W	DPH4	YBR162C	TOS1	0.036
YJR097W	DPH4	YCL025C	AGP1	0.036
YJR097W	DPH4	YCL050C	APA1	0.036
YJR097W	DPH4	YDL174C	DLD1	0.036
YJR097W	DPH4	YDR206W	EBS1	0.036
YJR097W	DPH4	YDR378C	LSM6	0.036
YJR097W	DPH4	YFL007W	BLM10	0.036
YJR097W	DPH4	YFL041W	FET5	0.036
YJR097W	DPH4	YFR038W	IRC5	0.036
YJR097W	DPH4	YGL002W	ERP6	0.036
YJR097W	DPH4	YGL003C	CDH1	0.036
YJR097W	DPH4	YGL009C	LEU1	0.036
YJR097W	DPH4	YHR087W	RTC3	0.036
YJR097W	DPH4	YKL078W_damp	DHR2_damp	0.036
YJR097W	DPH4	YKR075C	YKR075C	0.036
YJR097W	DPH4	YLR004C	THI73	0.036
YJR097W	DPH4	YLR148W	PEP3	0.036
YJR097W	DPH4	YML081C-A	ATP18	0.036
YJR097W	DPH4	YMR138W	CIN4	0.036
YJR097W	DPH4	YMR284W	YKU70	0.036
YJR097W	DPH4	YNL006W_tsq467	lst8-15	0.036
YJR097W	DPH4	YOR029W	YOR029W	0.036
YJR097W	DPH4	YOR242C	SSP2	0.036
YJR097W	DPH4	YOR310C_damp	NOP58_damp	0.036
YJR097W	DPH4	YOR317W	FAA1	0.036
YJR097W	DPH4	YPL107W	YPL107W	0.036
YJR097W	DPH4	YPL198W	RPL7B	0.036
YJR097W	DPH4	YPR027C	YPR027C	0.036
YJR097W	DPH4	YPR193C	HPA2	0.036
YJR097W	DPH4	YBL059W	YBL059W	0.035
YJR097W	DPH4	YBR033W	EDS1	0.035
YJR097W	DPH4	YBR071W	YBR071W	0.035
YJR097W	DPH4	YBR090C	YBR090C	0.035
YJR097W	DPH4	YDR441C	APT2	0.035
YJR097W	DPH4	YER087C-B	SBH1	0.035
YJR097W	DPH4	YER152C	YER152C	0.035
YJR097W	DPH4	YHL028W	WSC4	0.035
YJR097W	DPH4	YIL046W_tsq939	met30-9	0.035
YJR097W	DPH4	YKR060W	UTP30	0.035
YJR097W	DPH4	YLR103C_tsq694	cdc45-27	0.035
YJR097W	DPH4	YLR271W	YLR271W	0.035
YJR097W	DPH4	YLR297W	YLR297W	0.035
YJR097W	DPH4	YLR308W	CDA2	0.035
YJR097W	DPH4	YLR334C	YLR334C	0.035
YJR097W	DPH4	YLR445W	YLR445W	0.035
YJR097W	DPH4	YLR451W	LEU3	0.035
YJR097W	DPH4	YML038C	YMD8	0.035
YJR097W	DPH4	YML054C	CYB2	0.035
YJR097W	DPH4	YMR181C	YMR181C	0.035
YJR097W	DPH4	YMR258C	YMR258C	0.035
YJR097W	DPH4	YNL066W	SUN4	0.035
YJR097W	DPH4	YOL049W	GSH2	0.035
YJR097W	DPH4	YOL129W	VPS68	0.035
YJR097W	DPH4	YPL057C	SUR1	0.035
YJR097W	DPH4	YPL170W	DAP1	0.035
YJR097W	DPH4	YBL053W	YBL053W	0.034
YJR097W	DPH4	YBR112C	CYC8	0.034
YJR097W	DPH4	YBR240C	THI2	0.034
YJR097W	DPH4	YDL112W	TRM3	0.034
YJR097W	DPH4	YDR263C	DIN7	0.034
YJR097W	DPH4	YDR298C	ATP5	0.034
YJR097W	DPH4	YDR331W_tsq371	gpi8-ts	0.034
YJR097W	DPH4	YDR403W	DIT1	0.034
YJR097W	DPH4	YDR431W	YDR431W	0.034
YJR097W	DPH4	YER123W	YCK3	0.034
YJR097W	DPH4	YGL117W	YGL117W	0.034
YJR097W	DPH4	YGR133W	PEX4	0.034
YJR097W	DPH4	YGR192C	TDH3	0.034
YJR097W	DPH4	YGR294W	PAU12	0.034
YJR097W	DPH4	YIL119C	RPI1	0.034
YJR097W	DPH4	YIL168W	YIL168W	0.034
YJR097W	DPH4	YJL058C	BIT61	0.034
YJR097W	DPH4	YJR049C	UTR1	0.034
YJR097W	DPH4	YLL019C	KNS1	0.034
YJR097W	DPH4	YLL051C	FRE6	0.034
YJR097W	DPH4	YLR225C	YLR225C	0.034
YJR097W	DPH4	YLR300W	EXG1	0.034
YJR097W	DPH4	YLR345W	YLR345W	0.034
YJR097W	DPH4	YLR354C	TAL1	0.034
YJR097W	DPH4	YLR378C_tsq213	sec61-2	0.034
YJR097W	DPH4	YLR386W	VAC14	0.034
YJR097W	DPH4	YLR456W	YLR456W	0.034
YJR097W	DPH4	YML075C	HMG1	0.034
YJR097W	DPH4	YMR158C-A	YMR158C-A	0.034
YJR097W	DPH4	YMR302C	YME2	0.034
YJR097W	DPH4	YNL065W	AQR1	0.034
YJR097W	DPH4	YOL136C	PFK27	0.034
YJR097W	DPH4	YOR333C	YOR333C	0.034
YJR097W	DPH4	YAL019W	FUN30	0.033
YJR097W	DPH4	YBR260C	RGD1	0.033
YJR097W	DPH4	YCR007C	YCR007C	0.033
YJR097W	DPH4	YCR011C	ADP1	0.033
YJR097W	DPH4	YDR169C	STB3	0.033
YJR097W	DPH4	YDR282C	YDR282C	0.033
YJR097W	DPH4	YDR455C	YDR455C	0.033
YJR097W	DPH4	YER088C	DOT6	0.033
YJR097W	DPH4	YGL013C	PDR1	0.033
YJR097W	DPH4	YGL181W	GTS1	0.033
YJR097W	DPH4	YGR235C	YGR235C	0.033
YJR097W	DPH4	YGR276C	RNH70	0.033
YJR097W	DPH4	YIL006W	YIA6	0.033
YJR097W	DPH4	YIL009C-A	EST3	0.033
YJR097W	DPH4	YIL122W	POG1	0.033
YJR097W	DPH4	YJL112W	MDV1	0.033
YJR097W	DPH4	YJL182C	YJL182C	0.033
YJR097W	DPH4	YJL214W	HXT8	0.033
YJR097W	DPH4	YKL100C	YKL100C	0.033
YJR097W	DPH4	YKR040C	YKR040C	0.033
YJR097W	DPH4	YLR342W	FKS1	0.033
YJR097W	DPH4	YLR416C	YLR416C	0.033
YJR097W	DPH4	YML004C	GLO1	0.033
YJR097W	DPH4	YML012W	ERV25	0.033
YJR097W	DPH4	YML052W	SUR7	0.033
YJR097W	DPH4	YMR123W	PKR1	0.033
YJR097W	DPH4	YMR164C	MSS11	0.033
YJR097W	DPH4	YMR247C	RKR1	0.033
YJR097W	DPH4	YNL271C	BNI1	0.033
YJR097W	DPH4	YNR007C	ATG3	0.033
YJR097W	DPH4	YOL037C	YOL037C	0.033
YJR097W	DPH4	YOR115C	TRS33	0.033
YJR097W	DPH4	YOR381W	FRE3	0.033
YJR097W	DPH4	YOR393W	ERR1	0.033
YJR097W	DPH4	YPL029W	SUV3	0.033
YJR097W	DPH4	YPL144W	POC4	0.033
YJR097W	DPH4	YPL182C	YPL182C	0.033
YJR097W	DPH4	YPR173C	VPS4	0.033
YJR097W	DPH4	YAL021C_damp	CCR4_damp	0.032
YJR097W	DPH4	YBR060C_tsq311	orc2-2	0.032
YJR097W	DPH4	YBR075W	YBR075W	0.032
YJR097W	DPH4	YBR247C_tsq542	enp1-1	0.032
YJR097W	DPH4	YDL078C	MDH3	0.032
YJR097W	DPH4	YDR159W	SAC3	0.032
YJR097W	DPH4	YDR338C	YDR338C	0.032
YJR097W	DPH4	YDR411C	DFM1	0.032
YJR097W	DPH4	YEL065W	SIT1	0.032
YJR097W	DPH4	YFL034W	YFL034W	0.032
YJR097W	DPH4	YFL050C	ALR2	0.032
YJR097W	DPH4	YGL056C	SDS23	0.032
YJR097W	DPH4	YGL112C_tsq608	taf6-ts	0.032
YJR097W	DPH4	YGL156W	AMS1	0.032
YJR097W	DPH4	YGR123C	PPT1	0.032
YJR097W	DPH4	YGR131W	YGR131W	0.032
YJR097W	DPH4	YHR033W	YHR033W	0.032
YJR097W	DPH4	YHR035W	YHR035W	0.032
YJR097W	DPH4	YHR060W	VMA22	0.032
YJR097W	DPH4	YHR083W_tsq493	sam35-2	0.032
YJR097W	DPH4	YHR188C_damp	GPI16_damp	0.032
YJR097W	DPH4	YIL007C	NAS2	0.032
YJR097W	DPH4	YIL034C	CAP2	0.032
YJR097W	DPH4	YIL105C	SLM1	0.032
YJR097W	DPH4	YIR018W	YAP5	0.032
YJR097W	DPH4	YIR020C	YIR020C	0.032
YJR097W	DPH4	YJR038C	YJR038C	0.032
YJR097W	DPH4	YJR051W	OSM1	0.032
YJR097W	DPH4	YKL049C_damp	CSE4_damp	0.032
YJR097W	DPH4	YKL056C	TMA19	0.032
YJR097W	DPH4	YKR014C	YPT52	0.032
YJR097W	DPH4	YKR032W	YKR032W	0.032
YJR097W	DPH4	YLR179C	YLR179C	0.032
YJR097W	DPH4	YLR199C	PBA1	0.032
YJR097W	DPH4	YML118W	NGL3	0.032
YJR097W	DPH4	YMR110C	HFD1	0.032
YJR097W	DPH4	YNL051W	COG5	0.032
YJR097W	DPH4	YNL058C	YNL058C	0.032
YJR097W	DPH4	YNL314W	DAL82	0.032
YJR097W	DPH4	YOL036W	YOL036W	0.032
YJR097W	DPH4	YOR091W	TMA46	0.032
YJR097W	DPH4	YOR221C	MCT1	0.032
YJR097W	DPH4	YOR250C_damp	CLP1_damp	0.032
YJR097W	DPH4	YOR267C	HRK1	0.032
YJR097W	DPH4	YPL074W	YTA6	0.032
YJR097W	DPH4	YPL130W	SPO19	0.032
YJR097W	DPH4	YPL203W	TPK2	0.032
YJR097W	DPH4	YPR064W	YPR064W	0.032
YJR097W	DPH4	YPR091C	YPR091C	0.032
YJR097W	DPH4	YPR118W	MRI1	0.032
YJR097W	DPH4	YBL034C_tsq274	stu1-5	0.031
YJR097W	DPH4	YBR067C	TIP1	0.031
YJR097W	DPH4	YBR206W	YBR206W	0.031
YJR097W	DPH4	YDL081C	RPP1A	0.031
YJR097W	DPH4	YDL171C	GLT1	0.031
YJR097W	DPH4	YDR348C	YDR348C	0.031
YJR097W	DPH4	YDR428C	BNA7	0.031
YJR097W	DPH4	YEL016C	NPP2	0.031
YJR097W	DPH4	YER037W	PHM8	0.031
YJR097W	DPH4	YER145C	FTR1	0.031
YJR097W	DPH4	YFL046W	FMP32	0.031
YJR097W	DPH4	YFL051C	YFL051C	0.031
YJR097W	DPH4	YGL034C	YGL034C	0.031
YJR097W	DPH4	YGL126W	SCS3	0.031
YJR097W	DPH4	YGR194C	XKS1	0.031
YJR097W	DPH4	YGR287C	YGR287C	0.031
YJR097W	DPH4	YGR290W	YGR290W	0.031
YJR097W	DPH4	YHR079C	IRE1	0.031
YJR097W	DPH4	YIL001W	YIL001W	0.031
YJR097W	DPH4	YIL037C	PRM2	0.031
YJR097W	DPH4	YIL164C	NIT1	0.031
YJR097W	DPH4	YJR075W	HOC1	0.031
YJR097W	DPH4	YLL010C	PSR1	0.031
YJR097W	DPH4	YLR098C	CHA4	0.031
YJR097W	DPH4	YLR111W	YLR111W	0.031
YJR097W	DPH4	YLR314C_tsq130	cdc3-3	0.031
YJR097W	DPH4	YML029W	USA1	0.031
YJR097W	DPH4	YML042W	CAT2	0.031
YJR097W	DPH4	YPL103C	FMP30	0.031
YJR097W	DPH4	YPL159C	PET20	0.031
YJR097W	DPH4	YPL236C	ENV7	0.031
YJR097W	DPH4	YPR167C	MET16	0.031
YJR097W	DPH4	YBL008W	HIR1	0.03
YJR097W	DPH4	YBR257W_damp	POP4_damp	0.03
YJR097W	DPH4	YDL121C	YDL121C	0.03
YJR097W	DPH4	YDL222C	FMP45	0.03
YJR097W	DPH4	YDR148C	KGD2	0.03
YJR097W	DPH4	YDR200C	VPS64	0.03
YJR097W	DPH4	YDR244W	PEX5	0.03
YJR097W	DPH4	YDR297W	SUR2	0.03
YJR097W	DPH4	YDR370C	YDR370C	0.03
YJR097W	DPH4	YER046W	SPO73	0.03
YJR097W	DPH4	YGL131C	SNT2	0.03
YJR097W	DPH4	YGR256W	GND2	0.03
YJR097W	DPH4	YHR179W	OYE2	0.03
YJR097W	DPH4	YIL011W	TIR3	0.03
YJR097W	DPH4	YJL042W	MHP1	0.03
YJR097W	DPH4	YJL046W	AIM22	0.03
YJR097W	DPH4	YJL082W	IML2	0.03
YJR097W	DPH4	YLL020C	YLL020C	0.03
YJR097W	DPH4	YLR018C	POM34	0.03
YJR097W	DPH4	YLR023C	IZH3	0.03
YJR097W	DPH4	YLR093C	NYV1	0.03
YJR097W	DPH4	YLR208W_tsq55	sec13-1	0.03
YJR097W	DPH4	YLR298C_tsq844	yhc1-8	0.03
YJR097W	DPH4	YML070W	DAK1	0.03
YJR097W	DPH4	YMR031C	YMR031C	0.03
YJR097W	DPH4	YNL015W	PBI2	0.03
YJR097W	DPH4	YNL102W_tsq344	pol1-2	0.03
YJR097W	DPH4	YOR069W	VPS5	0.03
YJR097W	DPH4	YPL160W_tsq914	cdc60-ts	0.03
YJR097W	DPH4	YPL247C	YPL247C	0.03
YJR097W	DPH4	YBL007C	SLA1	0.029
YJR097W	DPH4	YBR219C	YBR219C	0.029
YJR097W	DPH4	YBR239C	ERT1	0.029
YJR097W	DPH4	YCR061W	YCR061W	0.029
YJR097W	DPH4	YDL120W_damp	YFH1_damp	0.029
YJR097W	DPH4	YDR251W	PAM1	0.029
YJR097W	DPH4	YFL027C	GYP8	0.029
YJR097W	DPH4	YGL050W	TYW3	0.029
YJR097W	DPH4	YGL055W_tsq506	ole1-m2	0.029
YJR097W	DPH4	YGL176C	YGL176C	0.029
YJR097W	DPH4	YGL249W	ZIP2	0.029
YJR097W	DPH4	YGR281W	YOR1	0.029
YJR097W	DPH4	YIL089W	YIL089W	0.029
YJR097W	DPH4	YIL095W	PRK1	0.029
YJR097W	DPH4	YIL155C	GUT2	0.029
YJR097W	DPH4	YJL106W	IME2	0.029
YJR097W	DPH4	YJR073C	OPI3	0.029
YJR097W	DPH4	YKL023W	YKL023W	0.029
YJR097W	DPH4	YKL059C_damp	MPE1_damp	0.029
YJR097W	DPH4	YKL171W	YKL171W	0.029
YJR097W	DPH4	YLL040C	VPS13	0.029
YJR097W	DPH4	YLR160C	ASP3-4	0.029
YJR097W	DPH4	YLR353W	BUD8	0.029
YJR097W	DPH4	YLR367W	RPS22B	0.029
YJR097W	DPH4	YML059C	NTE1	0.029
YJR097W	DPH4	YMR107W	SPG4	0.029
YJR097W	DPH4	YMR124W	YMR124W	0.029
YJR097W	DPH4	YNL085W	MKT1	0.029
YJR097W	DPH4	YOL027C	MDM38	0.029
YJR097W	DPH4	YOL080C	REX4	0.029
YJR097W	DPH4	YOL082W	ATG19	0.029
YJR097W	DPH4	YOR366W	YOR366W	0.029
YJR097W	DPH4	YPR069C	SPE3	0.029
YJR097W	DPH4	YPR090W	YPR090W	0.029
YJR097W	DPH4	YPR114W	YPR114W	0.029
YJR097W	DPH4	YPR156C	TPO3	0.029
YJR097W	DPH4	YBL060W	YEL1	0.028
YJR097W	DPH4	YBL091C-A	SCS22	0.028
YJR097W	DPH4	YCR014C	POL4	0.028
YJR097W	DPH4	YCR104W	PAU3	0.028
YJR097W	DPH4	YDL185W	TFP1	0.028
YJR097W	DPH4	YDL217C_tsq714	tim22-19	0.028
YJR097W	DPH4	YDR145W_tsq515	taf12-W486stop	0.028
YJR097W	DPH4	YDR220C	YDR220C	0.028
YJR097W	DPH4	YDR394W_tsq785	rpt3-1	0.028
YJR097W	DPH4	YER008C	SEC3	0.028
YJR097W	DPH4	YER149C	PEA2	0.028
YJR097W	DPH4	YGL116W_tsq368	cdc20-3	0.028
YJR097W	DPH4	YGR072W	UPF3	0.028
YJR097W	DPH4	YGR105W	VMA21	0.028
YJR097W	DPH4	YGR249W	MGA1	0.028
YJR097W	DPH4	YGR269W	YGR269W	0.028
YJR097W	DPH4	YHR022C	YHR022C	0.028
YJR097W	DPH4	YHR039C	MSC7	0.028
YJR097W	DPH4	YHR155W	YSP1	0.028
YJR097W	DPH4	YHR209W	CRG1	0.028
YJR097W	DPH4	YIR036C	IRC24	0.028
YJR097W	DPH4	YKL071W	YKL071W	0.028
YJR097W	DPH4	YKR015C	YKR015C	0.028
YJR097W	DPH4	YLR043C	TRX1	0.028
YJR097W	DPH4	YLR110C	CCW12	0.028
YJR097W	DPH4	YLR205C	HMX1	0.028
YJR097W	DPH4	YLR269C	YLR269C	0.028
YJR097W	DPH4	YMR214W	SCJ1	0.028
YJR097W	DPH4	YOR001W	RRP6	0.028
YJR097W	DPH4	YOR350C	MNE1	0.028
YJR097W	DPH4	YPL091W	GLR1	0.028
YJR097W	DPH4	YPL174C	NIP100	0.028
YJR097W	DPH4	YPR145W	ASN1	0.028
YJR097W	DPH4	YAL030W	SNC1	0.027
YJR097W	DPH4	YBL017C	PEP1	0.027
YJR097W	DPH4	YBL034C_tsq822	stu1-12	0.027
YJR097W	DPH4	YBR047W	FMP23	0.027
YJR097W	DPH4	YCL035C	GRX1	0.027
YJR097W	DPH4	YDL023C	YDL023C	0.027
YJR097W	DPH4	YDL218W	YDL218W	0.027
YJR097W	DPH4	YDL233W	YDL233W	0.027
YJR097W	DPH4	YDR363W-A	SEM1	0.027
YJR097W	DPH4	YER013W_tsq237	prp22-1	0.027
YJR097W	DPH4	YER110C_damp	KAP123_damp	0.027
YJR097W	DPH4	YFL042C	YFL042C	0.027
YJR097W	DPH4	YGL082W	YGL082W	0.027
YJR097W	DPH4	YGL125W	MET13	0.027
YJR097W	DPH4	YGL140C	YGL140C	0.027
YJR097W	DPH4	YGL157W	YGL157W	0.027
YJR097W	DPH4	YGL200C	EMP24	0.027
YJR097W	DPH4	YGR053C	YGR053C	0.027
YJR097W	DPH4	YGR173W	RBG2	0.027
YJR097W	DPH4	YGR270W	YTA7	0.027
YJR097W	DPH4	YHR123W	EPT1	0.027
YJR097W	DPH4	YHR129C	ARP1	0.027
YJR097W	DPH4	YHR189W	PTH1	0.027
YJR097W	DPH4	YJR080C	AIM24	0.027
YJR097W	DPH4	YJR147W	HMS2	0.027
YJR097W	DPH4	YKL008C	LAC1	0.027
YJR097W	DPH4	YKL034W	TUL1	0.027
YJR097W	DPH4	YKL130C	SHE2	0.027
YJR097W	DPH4	YKL216W	URA1	0.027
YJR097W	DPH4	YKR013W	PRY2	0.027
YJR097W	DPH4	YLL016W	SDC25	0.027
YJR097W	DPH4	YLR257W	YLR257W	0.027
YJR097W	DPH4	YLR309C	IMH1	0.027
YJR097W	DPH4	YLR312C	QNQ1	0.027
YJR097W	DPH4	YLR398C	SKI2	0.027
YJR097W	DPH4	YLR449W	FPR4	0.027
YJR097W	DPH4	YMR069W	NAT4	0.027
YJR097W	DPH4	YMR223W	UBP8	0.027
YJR097W	DPH4	YMR289W	ABZ2	0.027
YJR097W	DPH4	YMR300C	ADE4	0.027
YJR097W	DPH4	YNR026C_tsq52	sec12-4	0.027
YJR097W	DPH4	YOR144C	ELG1	0.027
YJR097W	DPH4	YOR273C	TPO4	0.027
YJR097W	DPH4	YOR329C_damp	SCD5_damp	0.027
YJR097W	DPH4	YOR334W	MRS2	0.027
YJR097W	DPH4	YOR360C	PDE2	0.027
YJR097W	DPH4	YPL176C	TRE1	0.027
YJR097W	DPH4	YPL245W	YPL245W	0.027
YJR097W	DPH4	YPR015C	YPR015C	0.027
YJR097W	DPH4	YPR044C	OPI11	0.027
YJR097W	DPH4	YPR124W	CTR1	0.027
YJR097W	DPH4	YAL017W	PSK1	0.026
YJR097W	DPH4	YBR052C	RFS1	0.026
YJR097W	DPH4	YBR060C_tsq331	orc2-3	0.026
YJR097W	DPH4	YBR065C	ECM2	0.026
YJR097W	DPH4	YBR263W	SHM1	0.026
YJR097W	DPH4	YBR283C	SSH1	0.026
YJR097W	DPH4	YDL124W	YDL124W	0.026
YJR097W	DPH4	YDR067C	OCA6	0.026
YJR097W	DPH4	YDR093W	DNF2	0.026
YJR097W	DPH4	YDR318W	MCM21	0.026
YJR097W	DPH4	YDR533C	HSP31	0.026
YJR097W	DPH4	YER151C	UBP3	0.026
YJR097W	DPH4	YGL058W	RAD6	0.026
YJR097W	DPH4	YGL139W	FLC3	0.026
YJR097W	DPH4	YGL144C	ROG1	0.026
YJR097W	DPH4	YGL177W	YGL177W	0.026
YJR097W	DPH4	YGR061C	ADE6	0.026
YJR097W	DPH4	YHL044W	YHL044W	0.026
YJR097W	DPH4	YJL148W	RPA34	0.026
YJR097W	DPH4	YLL006W	MMM1	0.026
YJR097W	DPH4	YLL048C	YBT1	0.026
YJR097W	DPH4	YLR188W	MDL1	0.026
YJR097W	DPH4	YLR321C_tsq955	sfh1-1	0.026
YJR097W	DPH4	YMR041C	ARA2	0.026
YJR097W	DPH4	YMR237W	BCH1	0.026
YJR097W	DPH4	YNL010W	YNL010W	0.026
YJR097W	DPH4	YNL052W	COX5A	0.026
YJR097W	DPH4	YNL282W_damp	POP3_damp	0.026
YJR097W	DPH4	YNR055C	HOL1	0.026
YJR097W	DPH4	YOL118C	YOL118C	0.026
YJR097W	DPH4	YOR290C_damp	SNF2_damp	0.026
YJR097W	DPH4	YPL069C	BTS1	0.026
YJR097W	DPH4	YPL106C	SSE1	0.026
YJR097W	DPH4	YPL260W	YPL260W	0.026
YJR097W	DPH4	YBL079W	NUP170	0.025
YJR097W	DPH4	YBR278W	DPB3	0.025
YJR097W	DPH4	YCL056C	YCL056C	0.025
YJR097W	DPH4	YDL018C	ERP3	0.025
YJR097W	DPH4	YDR125C	ECM18	0.025
YJR097W	DPH4	YDR425W	SNX41	0.025
YJR097W	DPH4	YGL051W	MST27	0.025
YJR097W	DPH4	YGL150C_damp	INO80_damp	0.025
YJR097W	DPH4	YGR040W	KSS1	0.025
YJR097W	DPH4	YGR085C	RPL11B	0.025
YJR097W	DPH4	YGR137W	YGR137W	0.025
YJR097W	DPH4	YHR086W	NAM8	0.025
YJR097W	DPH4	YIL161W	YIL161W	0.025
YJR097W	DPH4	YJL159W	HSP150	0.025
YJR097W	DPH4	YJR016C_damp	ILV3_damp	0.025
YJR097W	DPH4	YKL046C	DCW1	0.025
YJR097W	DPH4	YKR055W	RHO4	0.025
YJR097W	DPH4	YLL063C	AYT1	0.025
YJR097W	DPH4	YLR102C	APC9	0.025
YJR097W	DPH4	YLR191W	PEX13	0.025
YJR097W	DPH4	YLR255C	YLR255C	0.025
YJR097W	DPH4	YLR266C	PDR8	0.025
YJR097W	DPH4	YLR446W	YLR446W	0.025
YJR097W	DPH4	YML008C	ERG6	0.025
YJR097W	DPH4	YMR015C	ERG5	0.025
YJR097W	DPH4	YMR137C	PSO2	0.025
YJR097W	DPH4	YNR002C	ATO2	0.025
YJR097W	DPH4	YNR005C	YNR005C	0.025
YJR097W	DPH4	YOR313C	SPS4	0.025
YJR097W	DPH4	YOR354C	MSC6	0.025
YJR097W	DPH4	YBL064C	PRX1	0.024
YJR097W	DPH4	YBR034C	HMT1	0.024
YJR097W	DPH4	YBR046C	ZTA1	0.024
YJR097W	DPH4	YBR085W	AAC3	0.024
YJR097W	DPH4	YBR293W	VBA2	0.024
YJR097W	DPH4	YDR150W	NUM1	0.024
YJR097W	DPH4	YDR221W	GTB1	0.024
YJR097W	DPH4	YEL070W	DSF1	0.024
YJR097W	DPH4	YER066C-A	YER066C-A	0.024
YJR097W	DPH4	YFR023W	PES4	0.024
YJR097W	DPH4	YFR028C_tsq416	cdc14-2	0.024
YJR097W	DPH4	YGL164C	YRB30	0.024
YJR097W	DPH4	YGR091W_tsq472	prp31-1	0.024
YJR097W	DPH4	YGR185C_tsq290	tys1-1	0.024
YJR097W	DPH4	YIL042C	PKP1	0.024
YJR097W	DPH4	YIL050W	PCL7	0.024
YJR097W	DPH4	YIL097W	FYV10	0.024
YJR097W	DPH4	YIL124W	AYR1	0.024
YJR097W	DPH4	YIR043C	YIR043C	0.024
YJR097W	DPH4	YJL066C	MPM1	0.024
YJR097W	DPH4	YJL095W	BCK1	0.024
YJR097W	DPH4	YKL201C	MNN4	0.024
YJR097W	DPH4	YKL215C	YKL215C	0.024
YJR097W	DPH4	YLR276C_damp	DBP9_damp	0.024
YJR097W	DPH4	YLR288C	MEC3	0.024
YJR097W	DPH4	YLR298C_tsq840	yhc1-3	0.024
YJR097W	DPH4	YLR390W-A	CCW14	0.024
YJR097W	DPH4	YML019W	OST6	0.024
YJR097W	DPH4	YML020W	YML020W	0.024
YJR097W	DPH4	YML071C	COG8	0.024
YJR097W	DPH4	YML112W	CTK3	0.024
YJR097W	DPH4	YMR292W	GOT1	0.024
YJR097W	DPH4	YNL116W	DMA2	0.024
YJR097W	DPH4	YNL143C	YNL143C	0.024
YJR097W	DPH4	YNL292W	PUS4	0.024
YJR097W	DPH4	YNR034W	SOL1	0.024
YJR097W	DPH4	YOL054W	PSH1	0.024
YJR097W	DPH4	YOL099C	YOL099C	0.024
YJR097W	DPH4	YOR108W	LEU9	0.024
YJR097W	DPH4	YOR192C	THI72	0.024
YJR097W	DPH4	YOR248W	YOR248W	0.024
YJR097W	DPH4	YOR338W	YOR338W	0.024
YJR097W	DPH4	YOR374W	ALD4	0.024
YJR097W	DPH4	YPL021W	ECM23	0.024
YJR097W	DPH4	YPL073C	YPL073C	0.024
YJR097W	DPH4	YPL179W	PPQ1	0.024
YJR097W	DPH4	YBL102W	SFT2	0.023
YJR097W	DPH4	YBR112C_damp	CYC8_damp	0.023
YJR097W	DPH4	YBR177C	EHT1	0.023
YJR097W	DPH4	YCR098C	GIT1	0.023
YJR097W	DPH4	YDL001W	RMD1	0.023
YJR097W	DPH4	YDL013W	SLX5	0.023
YJR097W	DPH4	YDL025C	YDL025C	0.023
YJR097W	DPH4	YDL039C	PRM7	0.023
YJR097W	DPH4	YDL231C	BRE4	0.023
YJR097W	DPH4	YDR062W_damp	LCB2_damp	0.023
YJR097W	DPH4	YDR213W	UPC2	0.023
YJR097W	DPH4	YDR260C	SWM1	0.023
YJR097W	DPH4	YDR334W	SWR1	0.023
YJR097W	DPH4	YDR388W	RVS167	0.023
YJR097W	DPH4	YEL050C	RML2	0.023
YJR097W	DPH4	YER032W	FIR1	0.023
YJR097W	DPH4	YER133W_damp	GLC7_damp	0.023
YJR097W	DPH4	YER162C	RAD4	0.023
YJR097W	DPH4	YER180C	ISC10	0.023
YJR097W	DPH4	YFL052W	YFL052W	0.023
YJR097W	DPH4	YGL008C_damp	PMA1_damp	0.023
YJR097W	DPH4	YGL085W	YGL085W	0.023
YJR097W	DPH4	YGL118C	YGL118C	0.023
YJR097W	DPH4	YGR086C	PIL1	0.023
YJR097W	DPH4	YGR181W	TIM13	0.023
YJR097W	DPH4	YHL022C	SPO11	0.023
YJR097W	DPH4	YHR013C	ARD1	0.023
YJR097W	DPH4	YHR021W-A	ECM12	0.023
YJR097W	DPH4	YHR152W	SPO12	0.023
YJR097W	DPH4	YHR153C	SPO16	0.023
YJR097W	DPH4	YJR102C	VPS25	0.023
YJR097W	DPH4	YKR084C	HBS1	0.023
YJR097W	DPH4	YLR001C	YLR001C	0.023
YJR097W	DPH4	YLR002C_damp	NOC3_damp	0.023
YJR097W	DPH4	YLR049C	YLR049C	0.023
YJR097W	DPH4	YLR084C	RAX2	0.023
YJR097W	DPH4	YLR261C	VPS63	0.023
YJR097W	DPH4	YLR294C	YLR294C	0.023
YJR097W	DPH4	YML057W	CMP2	0.023
YJR097W	DPH4	YML113W	DAT1	0.023
YJR097W	DPH4	YML121W	GTR1	0.023
YJR097W	DPH4	YMR023C	MSS1	0.023
YJR097W	DPH4	YMR026C	PEX12	0.023
YJR097W	DPH4	YMR294W-A	YMR294W-A	0.023
YJR097W	DPH4	YNR041C	COQ2	0.023
YJR097W	DPH4	YNR044W	AGA1	0.023
YJR097W	DPH4	YOL030W	GAS5	0.023
YJR097W	DPH4	YOL151W	GRE2	0.023
YJR097W	DPH4	YOR003W	YSP3	0.023
YJR097W	DPH4	YOR123C	LEO1	0.023
YJR097W	DPH4	YOR214C	YOR214C	0.023
YJR097W	DPH4	YPL104W	MSD1	0.023
YJR097W	DPH4	YPL108W	YPL108W	0.023
YJR097W	DPH4	YPL185W	YPL185W	0.023
YJR097W	DPH4	YPL199C	YPL199C	0.023
YJR097W	DPH4	YBR023C	CHS3	0.022
YJR097W	DPH4	YBR032W	YBR032W	0.022
YJR097W	DPH4	YBR134W	YBR134W	0.022
YJR097W	DPH4	YBR284W	YBR284W	0.022
YJR097W	DPH4	YCL044C	MGR1	0.022
YJR097W	DPH4	YCL051W	LRE1	0.022
YJR097W	DPH4	YCR106W	RDS1	0.022
YJR097W	DPH4	YDL122W	UBP1	0.022
YJR097W	DPH4	YDL211C	YDL211C	0.022
YJR097W	DPH4	YDR070C	FMP16	0.022
YJR097W	DPH4	YDR408C	ADE8	0.022
YJR097W	DPH4	YDR472W_damp	TRS31_damp	0.022
YJR097W	DPH4	YDR497C	ITR1	0.022
YJR097W	DPH4	YER056C	FCY2	0.022
YJR097W	DPH4	YER132C	PMD1	0.022
YJR097W	DPH4	YFR022W	ROG3	0.022
YJR097W	DPH4	YFR053C	HXK1	0.022
YJR097W	DPH4	YGL022W_tsq544	stt3-7	0.022
YJR097W	DPH4	YGL208W	SIP2	0.022
YJR097W	DPH4	YGR025W	YGR025W	0.022
YJR097W	DPH4	YGR177C	ATF2	0.022
YJR097W	DPH4	YGR230W	BNS1	0.022
YJR097W	DPH4	YHR028C	DAP2	0.022
YJR097W	DPH4	YJL030W	MAD2	0.022
YJR097W	DPH4	YJL192C	SOP4	0.022
YJR097W	DPH4	YJR021C	REC107	0.022
YJR097W	DPH4	YJR044C	VPS55	0.022
YJR097W	DPH4	YJR098C	YJR098C	0.022
YJR097W	DPH4	YJR128W	YJR128W	0.022
YJR097W	DPH4	YKL124W	SSH4	0.022
YJR097W	DPH4	YKR016W	AIM28	0.022
YJR097W	DPH4	YLR065C	YLR065C	0.022
YJR097W	DPH4	YLR079W	SIC1	0.022
YJR097W	DPH4	YLR119W	SRN2	0.022
YJR097W	DPH4	YLR170C	APS1	0.022
YJR097W	DPH4	YLR337C	VRP1	0.022
YJR097W	DPH4	YLR385C	SWC7	0.022
YJR097W	DPH4	YLR453C	RIF2	0.022
YJR097W	DPH4	YMR172W	HOT1	0.022
YJR097W	DPH4	YMR186W	HSC82	0.022
YJR097W	DPH4	YNL037C	IDH1	0.022
YJR097W	DPH4	YNL076W	MKS1	0.022
YJR097W	DPH4	YNR018W	AIM38	0.022
YJR097W	DPH4	YNR062C	YNR062C	0.022
YJR097W	DPH4	YOL098C	YOL098C	0.022
YJR097W	DPH4	YOL141W	PPM2	0.022
YJR097W	DPH4	YOR005C	DNL4	0.022
YJR097W	DPH4	YOR043W	WHI2	0.022
YJR097W	DPH4	YPR070W	MED1	0.022
YJR097W	DPH4	YPR078C	YPR078C	0.022
YJR097W	DPH4	YAR043C	YAR043C	0.021
YJR097W	DPH4	YBR008C	FLR1	0.021
YJR097W	DPH4	YBR022W	POA1	0.021
YJR097W	DPH4	YBR076W	ECM8	0.021
YJR097W	DPH4	YBR212W	NGR1	0.021
YJR097W	DPH4	YBR275C	RIF1	0.021
YJR097W	DPH4	YCL026C	YCL026C	0.021
YJR097W	DPH4	YCR020C-A	MAK31	0.021
YJR097W	DPH4	YDR001C	NTH1	0.021
YJR097W	DPH4	YDR020C	DAS2	0.021
YJR097W	DPH4	YDR022C	CIS1	0.021
YJR097W	DPH4	YDR043C	NRG1	0.021
YJR097W	DPH4	YDR182W_tsq413	cdc1-2	0.021
YJR097W	DPH4	YDR192C	NUP42	0.021
YJR097W	DPH4	YDR209C	YDR209C	0.021
YJR097W	DPH4	YFR024C	YFR024C	0.021
YJR097W	DPH4	YFR047C	BNA6	0.021
YJR097W	DPH4	YGL045W	RIM8	0.021
YJR097W	DPH4	YGR022C	YGR022C	0.021
YJR097W	DPH4	YHR007C_damp	ERG11_damp	0.021
YJR097W	DPH4	YIL149C	MLP2	0.021
YJR097W	DPH4	YJL020C	BBC1	0.021
YJR097W	DPH4	YJL065C	DLS1	0.021
YJR097W	DPH4	YJL188C	BUD19	0.021
YJR097W	DPH4	YKL107W	YKL107W	0.021
YJR097W	DPH4	YKL110C	KTI12	0.021
YJR097W	DPH4	YKL116C	PRR1	0.021
YJR097W	DPH4	YLL021W	SPA2	0.021
YJR097W	DPH4	YLR062C	BUD28	0.021
YJR097W	DPH4	YLR120C	YPS1	0.021
YJR097W	DPH4	YLR154C	RNH203	0.021
YJR097W	DPH4	YLR264W	RPS28B	0.021
YJR097W	DPH4	YMR096W	SNZ1	0.021
YJR097W	DPH4	YMR104C	YPK2	0.021
YJR097W	DPH4	YNL291C	MID1	0.021
YJR097W	DPH4	YOR036W	PEP12	0.021
YJR097W	DPH4	YOR050C	YOR050C	0.021
YJR097W	DPH4	YOR215C	AIM41	0.021
YJR097W	DPH4	YPL023C	MET12	0.021
YJR097W	DPH4	YPL035C	YPL035C	0.021
YJR097W	DPH4	YPL272C	YPL272C	0.021
YJR097W	DPH4	YAR015W	ADE1	0.02
YJR097W	DPH4	YAR044W	YAR044W	0.02
YJR097W	DPH4	YBL027W	RPL19B	0.02
YJR097W	DPH4	YBR026C	ETR1	0.02
YJR097W	DPH4	YBR194W	AIM4	0.02
YJR097W	DPH4	YBR208C	DUR1,2	0.02
YJR097W	DPH4	YCL001W-A	YCL001W-A	0.02
YJR097W	DPH4	YCL042W	YCL042W	0.02
YJR097W	DPH4	YDL172C	YDL172C	0.02
YJR097W	DPH4	YDR009W	GAL3	0.02
YJR097W	DPH4	YDR122W	KIN1	0.02
YJR097W	DPH4	YDR165W	TRM82	0.02
YJR097W	DPH4	YDR286C	YDR286C	0.02
YJR097W	DPH4	YDR336W	YDR336W	0.02
YJR097W	DPH4	YDR419W	RAD30	0.02
YJR097W	DPH4	YDR512C	EMI1	0.02
YJR097W	DPH4	YER016W	BIM1	0.02
YJR097W	DPH4	YER072W	VTC1	0.02
YJR097W	DPH4	YFL008W_tsq321	smc1-2	0.02
YJR097W	DPH4	YGL165C	YGL165C	0.02
YJR097W	DPH4	YGL191W	COX13	0.02
YJR097W	DPH4	YGR225W	AMA1	0.02
YJR097W	DPH4	YHR095W	YHR095W	0.02
YJR097W	DPH4	YHR120W	MSH1	0.02
YJR097W	DPH4	YHR174W	ENO2	0.02
YJR097W	DPH4	YIL047C	SYG1	0.02
YJR097W	DPH4	YIL138C	TPM2	0.02
YJR097W	DPH4	YIR035C	YIR035C	0.02
YJR097W	DPH4	YJL191W	RPS14B	0.02
YJR097W	DPH4	YKR050W	TRK2	0.02
YJR097W	DPH4	YLR003C	CMS1	0.02
YJR097W	DPH4	YLR438W	CAR2	0.02
YJR097W	DPH4	YMR044W	IOC4	0.02
YJR097W	DPH4	YMR180C	CTL1	0.02
YJR097W	DPH4	YNL023C	FAP1	0.02
YJR097W	DPH4	YNR047W	FPK1	0.02
YJR097W	DPH4	YOL075C	YOL075C	0.02
YJR097W	DPH4	YOL111C	MDY2	0.02
YJR097W	DPH4	YOR153W	PDR5	0.02
YJR097W	DPH4	YOR182C	RPS30B	0.02
YJR097W	DPH4	YOR246C	YOR246C	0.02
YJR097W	DPH4	YOR351C	MEK1	0.02
YJR097W	DPH4	YPR068C	HOS1	0.02
YJR097W	DPH4	YPR130C	YPR130C	0.02
YJR097W	DPH4	YPR201W	ARR3	0.02
YJR097W	DPH4	YAL015C	NTG1	0.019
YJR097W	DPH4	YAL034W-A_tsq235	mtw1-ts	0.019
YJR097W	DPH4	YBL031W	SHE1	0.019
YJR097W	DPH4	YBL072C	RPS8A	0.019
YJR097W	DPH4	YDL145C_tsq704	cop1-1	0.019
YJR097W	DPH4	YDR109C	YDR109C	0.019
YJR097W	DPH4	YDR189W_tsq251	sly1-ts	0.019
YJR097W	DPH4	YDR284C	DPP1	0.019
YJR097W	DPH4	YDR436W	PPZ2	0.019
YJR097W	DPH4	YDR480W	DIG2	0.019
YJR097W	DPH4	YDR502C	SAM2	0.019
YJR097W	DPH4	YDR515W	SLF1	0.019
YJR097W	DPH4	YFL039C_tsq77	act1-120	0.019
YJR097W	DPH4	YGL066W	SGF73	0.019
YJR097W	DPH4	YGL152C	YGL152C	0.019
YJR097W	DPH4	YGR038W	ORM1	0.019
YJR097W	DPH4	YGR112W	SHY1	0.019
YJR097W	DPH4	YHR008C	SOD2	0.019
YJR097W	DPH4	YHR184W	SSP1	0.019
YJR097W	DPH4	YJL074C_tsq259	smc3-1	0.019
YJR097W	DPH4	YJL074C_tsq63	smc3-42	0.019
YJR097W	DPH4	YJR024C	MDE1	0.019
YJR097W	DPH4	YKL029C	MAE1	0.019
YJR097W	DPH4	YKL098W	MTC2	0.019
YJR097W	DPH4	YKL217W	JEN1	0.019
YJR097W	DPH4	YLR058C	SHM2	0.019
YJR097W	DPH4	YLR319C	BUD6	0.019
YJR097W	DPH4	YLR420W	URA4	0.019
YJR097W	DPH4	YMR033W_tsq495	arp9-1	0.019
YJR097W	DPH4	YMR068W	AVO2	0.019
YJR097W	DPH4	YMR102C	YMR102C	0.019
YJR097W	DPH4	YMR171C	EAR1	0.019
YJR097W	DPH4	YMR226C	TMA29	0.019
YJR097W	DPH4	YNL120C	YNL120C	0.019
YJR097W	DPH4	YNL127W	FAR11	0.019
YJR097W	DPH4	YNL187W	SWT21	0.019
YJR097W	DPH4	YNR028W	CPR8	0.019
YJR097W	DPH4	YOL045W	PSK2	0.019
YJR097W	DPH4	YOR034C	AKR2	0.019
YJR097W	DPH4	YOR080W	DIA2	0.019
YJR097W	DPH4	YOR088W	YOR088W	0.019
YJR097W	DPH4	YOR100C	CRC1	0.019
YJR097W	DPH4	YOR152C	YOR152C	0.019
YJR097W	DPH4	YOR222W	ODC2	0.019
YJR097W	DPH4	YPL062W	YPL062W	0.019
YJR097W	DPH4	YPL080C	YPL080C	0.019
YJR097W	DPH4	YPR109W	YPR109W	0.019
YJR097W	DPH4	YAL042W	ERV46	0.018
YJR097W	DPH4	YAR030C	YAR030C	0.018
YJR097W	DPH4	YAR071W	PHO11	0.018
YJR097W	DPH4	YBL048W	RRT1	0.018
YJR097W	DPH4	YBL078C	ATG8	0.018
YJR097W	DPH4	YBR109C_tsq157	cmd1-8	0.018
YJR097W	DPH4	YCL075W	YCL075W	0.018
YJR097W	DPH4	YDL006W	PTC1	0.018
YJR097W	DPH4	YDL083C	RPS16B	0.018
YJR097W	DPH4	YDL113C	ATG20	0.018
YJR097W	DPH4	YDL130W-A	STF1	0.018
YJR097W	DPH4	YDL137W	ARF2	0.018
YJR097W	DPH4	YDR255C	RMD5	0.018
YJR097W	DPH4	YDR422C	SIP1	0.018
YJR097W	DPH4	YDR424C	DYN2	0.018
YJR097W	DPH4	YDR531W_damp	CAB1_damp	0.018
YJR097W	DPH4	YEL018W	EAF5	0.018
YJR097W	DPH4	YFL039C_tsq223	act1-129	0.018
YJR097W	DPH4	YFL039C_tsq64	act1-124	0.018
YJR097W	DPH4	YGL205W	POX1	0.018
YJR097W	DPH4	YGL224C	SDT1	0.018
YJR097W	DPH4	YGR117C	YGR117C	0.018
YJR097W	DPH4	YGR260W	TNA1	0.018
YJR097W	DPH4	YGR292W	MAL12	0.018
YJR097W	DPH4	YHL037C	YHL037C	0.018
YJR097W	DPH4	YHR208W	BAT1	0.018
YJR097W	DPH4	YIL032C	YIL032C	0.018
YJR097W	DPH4	YIL163C	YIL163C	0.018
YJR097W	DPH4	YJL068C	YJL068C	0.018
YJR097W	DPH4	YJR010C-A	SPC1	0.018
YJR097W	DPH4	YJR126C	VPS70	0.018
YJR097W	DPH4	YKL094W	YJU3	0.018
YJR097W	DPH4	YLR027C_damp	AAT2_damp	0.018
YJR097W	DPH4	YML009C	MRPL39	0.018
YJR097W	DPH4	YML017W	PSP2	0.018
YJR097W	DPH4	YMR018W	YMR018W	0.018
YJR097W	DPH4	YMR154C	RIM13	0.018
YJR097W	DPH4	YMR172C-A	YMR172C-A	0.018
YJR097W	DPH4	YMR232W	FUS2	0.018
YJR097W	DPH4	YMR238W	DFG5	0.018
YJR097W	DPH4	YMR245W	YMR245W	0.018
YJR097W	DPH4	YNL012W	SPO1	0.018
YJR097W	DPH4	YNL027W	CRZ1	0.018
YJR097W	DPH4	YNR051C	BRE5	0.018
YJR097W	DPH4	YOR204W_tsq561	ded1-95	0.018
YJR097W	DPH4	YOR271C	FSF1	0.018
YJR097W	DPH4	YPR030W	CSR2	0.018
YJR097W	DPH4	YPR170C	YPR170C	0.018
YJR097W	DPH4	YAL063C	FLO9	0.017
YJR097W	DPH4	YBR016W	YBR016W	0.017
YJR097W	DPH4	YBR040W	FIG1	0.017
YJR097W	DPH4	YBR205W	KTR3	0.017
YJR097W	DPH4	YBR255W	MTC4	0.017
YJR097W	DPH4	YDL061C	RPS29B	0.017
YJR097W	DPH4	YDL127W	PCL2	0.017
YJR097W	DPH4	YDL150W_damp	RPC53_damp	0.017
YJR097W	DPH4	YDL215C	GDH2	0.017
YJR097W	DPH4	YDL224C	WHI4	0.017
YJR097W	DPH4	YDR517W	GRH1	0.017
YJR097W	DPH4	YER164W	CHD1	0.017
YJR097W	DPH4	YGL027C	CWH41	0.017
YJR097W	DPH4	YGL159W	YGL159W	0.017
YJR097W	DPH4	YGR031W	YGR031W	0.017
YJR097W	DPH4	YGR037C	ACB1	0.017
YJR097W	DPH4	YGR096W	TPC1	0.017
YJR097W	DPH4	YHR016C	YSC84	0.017
YJR097W	DPH4	YHR046C	INM1	0.017
YJR097W	DPH4	YIL023C	YKE4	0.017
YJR097W	DPH4	YIR032C	DAL3	0.017
YJR097W	DPH4	YJL060W	BNA3	0.017
YJR097W	DPH4	YJL084C	ALY2	0.017
YJR097W	DPH4	YJL103C	GSM1	0.017
YJR097W	DPH4	YKL061W	YKL061W	0.017
YJR097W	DPH4	YKL114C	APN1	0.017
YJR097W	DPH4	YKL128C	PMU1	0.017
YJR097W	DPH4	YKR049C	FMP46	0.017
YJR097W	DPH4	YLR095C	IOC2	0.017
YJR097W	DPH4	YLR238W	FAR10	0.017
YJR097W	DPH4	YLR262C-A	TMA7	0.017
YJR097W	DPH4	YLR376C	PSY3	0.017
YJR097W	DPH4	YLR405W	DUS4	0.017
YJR097W	DPH4	YML003W	YML003W	0.017
YJR097W	DPH4	YML090W	YML090W	0.017
YJR097W	DPH4	YMR011W	HXT2	0.017
YJR097W	DPH4	YMR031W-A	YMR031W-A	0.017
YJR097W	DPH4	YMR140W	SIP5	0.017
YJR097W	DPH4	YMR176W	ECM5	0.017
YJR097W	DPH4	YMR282C	AEP2	0.017
YJR097W	DPH4	YNL056W	OCA2	0.017
YJR097W	DPH4	YNL077W	APJ1	0.017
YJR097W	DPH4	YNL083W	SAL1	0.017
YJR097W	DPH4	YOL015W	IRC10	0.017
YJR097W	DPH4	YOL021C_damp	DIS3_damp	0.017
YJR097W	DPH4	YOL089C	HAL9	0.017
YJR097W	DPH4	YOR264W	DSE3	0.017
YJR097W	DPH4	YPL116W	HOS3	0.017
YJR097W	DPH4	YPL186C	UIP4	0.017
YJR097W	DPH4	YAL028W	FRT2	0.016
YJR097W	DPH4	YBL062W	YBL062W	0.016
YJR097W	DPH4	YBR060C_tsq295	orc2-1	0.016
YJR097W	DPH4	YBR188C	NTC20	0.016
YJR097W	DPH4	YBR242W	YBR242W	0.016
YJR097W	DPH4	YBR258C	SHG1	0.016
YJR097W	DPH4	YCL040W	GLK1	0.016
YJR097W	DPH4	YCR001W	YCR001W	0.016
YJR097W	DPH4	YCR020C	PET18	0.016
YJR097W	DPH4	YCR043C	YCR043C	0.016
YJR097W	DPH4	YCR102C	YCR102C	0.016
YJR097W	DPH4	YDR104C	SPO71	0.016
YJR097W	DPH4	YDR179W-A	YDR179W-A	0.016
YJR097W	DPH4	YDR274C	YDR274C	0.016
YJR097W	DPH4	YDR292C_damp	SRP101_damp	0.016
YJR097W	DPH4	YDR374C	YDR374C	0.016
YJR097W	DPH4	YDR475C	JIP4	0.016
YJR097W	DPH4	YER047C	SAP1	0.016
YJR097W	DPH4	YFR048W	RMD8	0.016
YJR097W	DPH4	YGL021W	ALK1	0.016
YJR097W	DPH4	YGL044C_tsq652	rna15-58	0.016
YJR097W	DPH4	YGL046W	YGL046W	0.016
YJR097W	DPH4	YGL054C	ERV14	0.016
YJR097W	DPH4	YGL062W	PYC1	0.016
YJR097W	DPH4	YGL222C	EDC1	0.016
YJR097W	DPH4	YGL260W	YGL260W	0.016
YJR097W	DPH4	YGR199W	PMT6	0.016
YJR097W	DPH4	YGR288W	MAL13	0.016
YJR097W	DPH4	YHR142W	CHS7	0.016
YJR097W	DPH4	YIL041W	GVP36	0.016
YJR097W	DPH4	YJL028W	YJL028W	0.016
YJR097W	DPH4	YKL020C	SPT23	0.016
YJR097W	DPH4	YKL063C	YKL063C	0.016
YJR097W	DPH4	YKR005C	YKR005C	0.016
YJR097W	DPH4	YLR015W	BRE2	0.016
YJR097W	DPH4	YLR022C_damp	SDO1_damp	0.016
YJR097W	DPH4	YLR224W	YLR224W	0.016
YJR097W	DPH4	YLR253W	YLR253W	0.016
YJR097W	DPH4	YMR006C	PLB2	0.016
YJR097W	DPH4	YMR125W_damp	STO1_damp	0.016
YJR097W	DPH4	YMR129W	POM152	0.016
YJR097W	DPH4	YMR145C	NDE1	0.016
YJR097W	DPH4	YMR266W	RSN1	0.016
YJR097W	DPH4	YMR294W	JNM1	0.016
YJR097W	DPH4	YNL003C	PET8	0.016
YJR097W	DPH4	YNR040W	YNR040W	0.016
YJR097W	DPH4	YOL095C	HMI1	0.016
YJR097W	DPH4	YOR135C	IRC14	0.016
YJR097W	DPH4	YPL221W	FLC1	0.016
YJR097W	DPH4	YPR007C	REC8	0.016
YJR097W	DPH4	YPR023C	EAF3	0.016
YJR097W	DPH4	YPR140W	TAZ1	0.016
YJR097W	DPH4	YPR148C	YPR148C	0.016
YJR097W	DPH4	YAR020C	PAU7	0.015
YJR097W	DPH4	YBR007C	DSF2	0.015
YJR097W	DPH4	YBR093C	PHO5	0.015
YJR097W	DPH4	YBR128C	ATG14	0.015
YJR097W	DPH4	YBR249C	ARO4	0.015
YJR097W	DPH4	YCL004W_damp	PGS1_damp	0.015
YJR097W	DPH4	YCR015C	YCR015C	0.015
YJR097W	DPH4	YCR027C	RHB1	0.015
YJR097W	DPH4	YDR003W	RCR2	0.015
YJR097W	DPH4	YDR007W	TRP1	0.015
YJR097W	DPH4	YDR014W	RAD61	0.015
YJR097W	DPH4	YDR046C	BAP3	0.015
YJR097W	DPH4	YDR178W	SDH4	0.015
YJR097W	DPH4	YDR481C	PHO8	0.015
YJR097W	DPH4	YDR542W	PAU10	0.015
YJR097W	DPH4	YER017C	AFG3	0.015
YJR097W	DPH4	YER071C	YER071C	0.015
YJR097W	DPH4	YER083C	GET2	0.015
YJR097W	DPH4	YER142C	MAG1	0.015
YJR097W	DPH4	YFL031W	HAC1	0.015
YJR097W	DPH4	YFL040W	YFL040W	0.015
YJR097W	DPH4	YFR018C	YFR018C	0.015
YJR097W	DPH4	YGR019W	UGA1	0.015
YJR097W	DPH4	YGR193C	PDX1	0.015
YJR097W	DPH4	YGR196C	FYV8	0.015
YJR097W	DPH4	YGR283C	YGR283C	0.015
YJR097W	DPH4	YIL002C	INP51	0.015
YJR097W	DPH4	YIR039C	YPS6	0.015
YJR097W	DPH4	YJL151C	SNA3	0.015
YJR097W	DPH4	YKL001C	MET14	0.015
YJR097W	DPH4	YKL007W	CAP1	0.015
YJR097W	DPH4	YKL025C	PAN3	0.015
YJR097W	DPH4	YKR057W	RPS21A	0.015
YJR097W	DPH4	YKR099W	BAS1	0.015
YJR097W	DPH4	YLL057C	JLP1	0.015
YJR097W	DPH4	YML076C	WAR1	0.015
YJR097W	DPH4	YML087C	AIM33	0.015
YJR097W	DPH4	YMR055C	BUB2	0.015
YJR097W	DPH4	YMR092C	AIP1	0.015
YJR097W	DPH4	YMR133W	REC114	0.015
YJR097W	DPH4	YNL257C	SIP3	0.015
YJR097W	DPH4	YNR052C_damp	POP2_damp	0.015
YJR097W	DPH4	YOR022C	YOR022C	0.015
YJR097W	DPH4	YOR081C	TGL5	0.015
YJR097W	DPH4	YOR171C	LCB4	0.015
YJR097W	DPH4	YOR173W	DCS2	0.015
YJR097W	DPH4	YOR253W	NAT5	0.015
YJR097W	DPH4	YOR269W	PAC1	0.015
YJR097W	DPH4	YOR321W	PMT3	0.015
YJR097W	DPH4	YOR365C	YOR365C	0.015
YJR097W	DPH4	YPL045W	VPS16	0.015
YJR097W	DPH4	YPL123C	RNY1	0.015
YJR097W	DPH4	YPR058W	YMC1	0.015
YJR097W	DPH4	YPR098C	YPR098C	0.015
YJR097W	DPH4	YAL041W_tsq412	cdc24-3	0.014
YJR097W	DPH4	YAR002W	NUP60	0.014
YJR097W	DPH4	YBL047C	EDE1	0.014
YJR097W	DPH4	YBR119W	MUD1	0.014
YJR097W	DPH4	YBR223C	TDP1	0.014
YJR097W	DPH4	YCR067C	SED4	0.014
YJR097W	DPH4	YCR087C-A	LUG1	0.014
YJR097W	DPH4	YDR215C	YDR215C	0.014
YJR097W	DPH4	YDR262W	YDR262W	0.014
YJR097W	DPH4	YDR272W	GLO2	0.014
YJR097W	DPH4	YDR380W	ARO10	0.014
YJR097W	DPH4	YER075C	PTP3	0.014
YJR097W	DPH4	YER128W	YER128W	0.014
YJR097W	DPH4	YER178W	PDA1	0.014
YJR097W	DPH4	YFL009W_tsq415	cdc4-2	0.014
YJR097W	DPH4	YFR030W	MET10	0.014
YJR097W	DPH4	YFR051C_tsq823	ret2-1	0.014
YJR097W	DPH4	YGL234W	ADE5,7	0.014
YJR097W	DPH4	YGR275W	RTT102	0.014
YJR097W	DPH4	YHL024W	RIM4	0.014
YJR097W	DPH4	YKL150W	MCR1	0.014
YJR097W	DPH4	YKL206C	ADD66	0.014
YJR097W	DPH4	YLL017W	YLL017W	0.014
YJR097W	DPH4	YLL049W	LDB18	0.014
YJR097W	DPH4	YLL054C	YLL054C	0.014
YJR097W	DPH4	YLR077W	FMP25	0.014
YJR097W	DPH4	YLR121C	YPS3	0.014
YJR097W	DPH4	YLR206W	ENT2	0.014
YJR097W	DPH4	YLR239C	LIP2	0.014
YJR097W	DPH4	YML099C	ARG81	0.014
YJR097W	DPH4	YMR210W	YMR210W	0.014
YJR097W	DPH4	YNR025C	YNR025C	0.014
YJR097W	DPH4	YOL031C	SIL1	0.014
YJR097W	DPH4	YOL116W	MSN1	0.014
YJR097W	DPH4	YOR042W	CUE5	0.014
YJR097W	DPH4	YOR166C	SWT1	0.014
YJR097W	DPH4	YOR291W	YPK9	0.014
YJR097W	DPH4	YPL157W	TGS1	0.014
YJR097W	DPH4	YPL195W	APL5	0.014
YJR097W	DPH4	YPR009W	SUT2	0.014
YJR097W	DPH4	YPR014C	YPR014C	0.014
YJR097W	DPH4	YBR218C	PYC2	0.013
YJR097W	DPH4	YBR224W	YBR224W	0.013
YJR097W	DPH4	YBR238C	YBR238C	0.013
YJR097W	DPH4	YCR063W	BUD31	0.013
YJR097W	DPH4	YDL003W_tsq62	mcd1-73	0.013
YJR097W	DPH4	YDL027C	YDL027C	0.013
YJR097W	DPH4	YDL071C	YDL071C	0.013
YJR097W	DPH4	YDL238C	GUD1	0.013
YJR097W	DPH4	YDR072C	IPT1	0.013
YJR097W	DPH4	YDR098C	GRX3	0.013
YJR097W	DPH4	YDR149C	YDR149C	0.013
YJR097W	DPH4	YDR250C	YDR250C	0.013
YJR097W	DPH4	YDR256C	CTA1	0.013
YJR097W	DPH4	YDR258C	HSP78	0.013
YJR097W	DPH4	YDR360W	OPI7	0.013
YJR097W	DPH4	YDR401W	YDR401W	0.013
YJR097W	DPH4	YDR488C	PAC11	0.013
YJR097W	DPH4	YGL216W	KIP3	0.013
YJR097W	DPH4	YGL227W	VID30	0.013
YJR097W	DPH4	YGR262C	BUD32	0.013
YJR097W	DPH4	YHR017W	YSC83	0.013
YJR097W	DPH4	YHR043C	DOG2	0.013
YJR097W	DPH4	YHR195W	NVJ1	0.013
YJR097W	DPH4	YIL017C	VID28	0.013
YJR097W	DPH4	YIR005W	IST3	0.013
YJR097W	DPH4	YJL055W	YJL055W	0.013
YJR097W	DPH4	YJR111C	YJR111C	0.013
YJR097W	DPH4	YLR193C	UPS1	0.013
YJR097W	DPH4	YMR100W	MUB1	0.013
YJR097W	DPH4	YMR111C	YMR111C	0.013
YJR097W	DPH4	YMR299C	DYN3	0.013
YJR097W	DPH4	YNL223W	ATG4	0.013
YJR097W	DPH4	YNR015W	SMM1	0.013
YJR097W	DPH4	YOR216C	RUD3	0.013
YJR097W	DPH4	YOR237W	HES1	0.013
YJR097W	DPH4	YOR266W	PNT1	0.013
YJR097W	DPH4	YPL145C	KES1	0.013
YJR097W	DPH4	YPL155C	KIP2	0.013
YJR097W	DPH4	YPR050C	YPR050C	0.013
YJR097W	DPH4	YBL021C	HAP3	0.012
YJR097W	DPH4	YBR024W	SCO2	0.012
YJR097W	DPH4	YBR069C	TAT1	0.012
YJR097W	DPH4	YBR105C	VID24	0.012
YJR097W	DPH4	YBR138C	YBR138C	0.012
YJR097W	DPH4	YBR300C	YBR300C	0.012
YJR097W	DPH4	YCL069W	VBA3	0.012
YJR097W	DPH4	YDL066W	IDP1	0.012
YJR097W	DPH4	YDR013W_tsq583	psf1-1	0.012
YJR097W	DPH4	YDR019C	GCV1	0.012
YJR097W	DPH4	YDR049W	YDR049W	0.012
YJR097W	DPH4	YFL025C	BST1	0.012
YJR097W	DPH4	YGL202W	ARO8	0.012
YJR097W	DPH4	YGR044C	RME1	0.012
YJR097W	DPH4	YGR206W	MVB12	0.012
YJR097W	DPH4	YIL053W	RHR2	0.012
YJR097W	DPH4	YJL217W	REE1	0.012
YJR097W	DPH4	YJR047C	ANB1	0.012
YJR097W	DPH4	YJR125C	ENT3	0.012
YJR097W	DPH4	YKL092C	BUD2	0.012
YJR097W	DPH4	YKL160W	ELF1	0.012
YJR097W	DPH4	YKR039W	GAP1	0.012
YJR097W	DPH4	YLL060C	GTT2	0.012
YJR097W	DPH4	YML114C_tsq695	taf8-7	0.012
YJR097W	DPH4	YMR088C	VBA1	0.012
YJR097W	DPH4	YMR189W	GCV2	0.012
YJR097W	DPH4	YMR311C	GLC8	0.012
YJR097W	DPH4	YNL144C	YNL144C	0.012
YJR097W	DPH4	YNL273W	TOF1	0.012
YJR097W	DPH4	YOL070C	NBA1	0.012
YJR097W	DPH4	YOR083W	WHI5	0.012
YJR097W	DPH4	YOR254C_tsq231	sec63-1	0.012
YJR097W	DPH4	YOR327C	SNC2	0.012
YJR097W	DPH4	YPR036W	VMA13	0.012
YJR097W	DPH4	YPR164W	MMS1	0.012
YJR097W	DPH4	YAL022C	FUN26	0.011
YJR097W	DPH4	YAR002C-A	ERP1	0.011
YJR097W	DPH4	YBR048W	RPS11B	0.011
YJR097W	DPH4	YCR048W	ARE1	0.011
YJR097W	DPH4	YCR073C	SSK22	0.011
YJR097W	DPH4	YDL020C	RPN4	0.011
YJR097W	DPH4	YDL194W	SNF3	0.011
YJR097W	DPH4	YDR156W	RPA14	0.011
YJR097W	DPH4	YDR162C	NBP2	0.011
YJR097W	DPH4	YDR179C	CSN9	0.011
YJR097W	DPH4	YER061C	CEM1	0.011
YJR097W	DPH4	YFR026C	ULI1	0.011
YJR097W	DPH4	YFR039C	YFR039C	0.011
YJR097W	DPH4	YGL098W_tsq592	use1-ts	0.011
YJR097W	DPH4	YGL187C	COX4	0.011
YJR097W	DPH4	YGR060W_damp	ERG25_damp	0.011
YJR097W	DPH4	YGR111W	YGR111W	0.011
YJR097W	DPH4	YGR203W	YGR203W	0.011
YJR097W	DPH4	YIL036W	CST6	0.011
YJR097W	DPH4	YIL083C_damp	YIL083C_damp	0.011
YJR097W	DPH4	YIR030C	DCG1	0.011
YJR097W	DPH4	YKL033W-A	YKL033W-A	0.011
YJR097W	DPH4	YKL051W	SFK1	0.011
YJR097W	DPH4	YKR103W	NFT1	0.011
YJR097W	DPH4	YLL061W	MMP1	0.011
YJR097W	DPH4	YLR012C	YLR012C	0.011
YJR097W	DPH4	YLR081W	GAL2	0.011
YJR097W	DPH4	YLR146C	SPE4	0.011
YJR097W	DPH4	YLR299W	ECM38	0.011
YJR097W	DPH4	YLR324W	PEX30	0.011
YJR097W	DPH4	YLR461W	PAU4	0.011
YJR097W	DPH4	YNL119W	NCS2	0.011
YJR097W	DPH4	YNL313C_damp	YNL313C_damp	0.011
YJR097W	DPH4	YNR019W	ARE2	0.011
YJR097W	DPH4	YOL053W	AIM39	0.011
YJR097W	DPH4	YOL060C	MAM3	0.011
YJR097W	DPH4	YOR067C	ALG8	0.011
YJR097W	DPH4	YOR078W	BUD21	0.011
YJR097W	DPH4	YOR085W	OST3	0.011
YJR097W	DPH4	YOR089C	VPS21	0.011
YJR097W	DPH4	YPL085W_tsq119	sec16-2	0.011
YJR097W	DPH4	YPR147C	YPR147C	0.011
YJR097W	DPH4	YAL058W	CNE1	0.01
YJR097W	DPH4	YBR198C_tsq509	taf5-3	0.01
YJR097W	DPH4	YCL032W	STE50	0.01
YJR097W	DPH4	YCR016W	YCR016W	0.01
YJR097W	DPH4	YDL109C	YDL109C	0.01
YJR097W	DPH4	YDR218C	SPR28	0.01
YJR097W	DPH4	YDR275W	BSC2	0.01
YJR097W	DPH4	YDR485C	VPS72	0.01
YJR097W	DPH4	YER085C	YER085C	0.01
YJR097W	DPH4	YER093C-A	AIM11	0.01
YJR097W	DPH4	YGL005C	COG7	0.01
YJR097W	DPH4	YGL077C	HNM1	0.01
YJR097W	DPH4	YGL162W	SUT1	0.01
YJR097W	DPH4	YGL262W	YGL262W	0.01
YJR097W	DPH4	YGR135W	PRE9	0.01
YJR097W	DPH4	YGR176W	YGR176W	0.01
YJR097W	DPH4	YJL073W	JEM1	0.01
YJR097W	DPH4	YJL185C	YJL185C	0.01
YJR097W	DPH4	YJR140C	HIR3	0.01
YJR097W	DPH4	YML104C	MDM1	0.01
YJR097W	DPH4	YMR036C	MIH1	0.01
YJR097W	DPH4	YMR119W	ASI1	0.01
YJR097W	DPH4	YMR152W	YIM1	0.01
YJR097W	DPH4	YMR163C	INP2	0.01
YJR097W	DPH4	YMR204C	INP1	0.01
YJR097W	DPH4	YMR251W	GTO3	0.01
YJR097W	DPH4	YMR317W	YMR317W	0.01
YJR097W	DPH4	YNL098C	RAS2	0.01
YJR097W	DPH4	YNL113W_damp	RPC19_damp	0.01
YJR097W	DPH4	YNL115C	YNL115C	0.01
YJR097W	DPH4	YOR072W	YOR072W	0.01
YJR097W	DPH4	YOR125C	CAT5	0.01
YJR097W	DPH4	YOR172W	YRM1	0.01
YJR097W	DPH4	YOR315W	SFG1	0.01
YJR097W	DPH4	YOR342C	YOR342C	0.01
YJR097W	DPH4	YPL113C	YPL113C	0.01
YJR097W	DPH4	YPL158C	AIM44	0.01
YJR097W	DPH4	YPL163C	SVS1	0.01
YJR097W	DPH4	YPR171W	BSP1	0.01
YJR097W	DPH4	YAL043C-A	YAL043C-A	0.009
[truncated: 2,458 more rows]

## Sheet: YBR246W
ORF1	Gene1	ORF2	Gene2	Correlation
YBR246W	YBR246W	YBR245C	ISW1	0.434
YBR246W	YBR246W	YKL191W	DPH2	0.278
YBR246W	YBR246W	YLR095C	IOC2	0.27
YBR246W	YBR246W	YJR097W	DPH4/JJJ3	0.234
YBR246W	YBR246W	YLR172C	DPH5	0.222
YBR246W	YBR246W	YIL103W	DPH1	0.21
YBR246W	YBR246W	YDL053C	PBP4	0.197
YBR246W	YBR246W	YDL085W	NDE2	0.174
YBR246W	YBR246W	YCR077C	PAT1	0.17
YBR246W	YBR246W	YBR261C	TAE1	0.166
YBR246W	YBR246W	YDR428C	BNA7	0.16
YBR246W	YBR246W	YLR143W	YLR143W	0.16
YBR246W	YBR246W	YOR243C	PUS7	0.16
YBR246W	YBR246W	YER177W	BMH1	0.158
YBR246W	YBR246W	YMR044W	IOC4	0.157
YBR246W	YBR246W	YHR097C	YHR097C	0.15
YBR246W	YBR246W	YLR094C	GIS3	0.15
YBR246W	YBR246W	YBR224W	YBR224W	0.147
YBR246W	YBR246W	YOR298C-A	MBF1	0.146
YBR246W	YBR246W	YKR095W	MLP1	0.143
YBR246W	YBR246W	YNL064C	YDJ1	0.143
YBR246W	YBR246W	YIL077C	YIL077C	0.141
YBR246W	YBR246W	YDL129W	YDL129W	0.138
YBR246W	YBR246W	YER113C	TMN3	0.138
YBR246W	YBR246W	YER175C	TMT1	0.138
YBR246W	YBR246W	YBR255W	MTC4	0.136
YBR246W	YBR246W	YJL124C	LSM1	0.135
YBR246W	YBR246W	YPR114W	YPR114W	0.135
YBR246W	YBR246W	YPR126C	YPR126C	0.134
YBR246W	YBR246W	YBR278W	DPB3	0.133
YBR246W	YBR246W	YMR087W	YMR087W	0.133
YBR246W	YBR246W	YKR084C	HBS1	0.132
YBR246W	YBR246W	YNL058C	YNL058C	0.132
YBR246W	YBR246W	YML070W	DAK1	0.131
YBR246W	YBR246W	YLR003C	CMS1	0.13
YBR246W	YBR246W	YBR020W	GAL1	0.129
YBR246W	YBR246W	YNL074C	MLF3	0.129
YBR246W	YBR246W	YPR118W	MRI1	0.129
YBR246W	YBR246W	YIL145C	PAN6	0.127
YBR246W	YBR246W	YHR078W	YHR078W	0.126
YBR246W	YBR246W	YBR006W	UGA2	0.125
YBR246W	YBR246W	YCL039W	GID7	0.125
YBR246W	YBR246W	YBR292C	YBR292C	0.124
YBR246W	YBR246W	YDL188C	PPH22	0.124
YBR246W	YBR246W	YDR272W	GLO2	0.124
YBR246W	YBR246W	YMR283C	RIT1	0.124
YBR246W	YBR246W	YDR099W	BMH2	0.123
YBR246W	YBR246W	YJL164C	TPK1	0.123
YBR246W	YBR246W	YDL186W	YDL186W	0.122
YBR246W	YBR246W	YOR308C	SNU66	0.121
YBR246W	YBR246W	YDL113C	ATG20	0.12
YBR246W	YBR246W	YDR474C	YDR474C	0.12
YBR246W	YBR246W	YPR075C	OPY2	0.12
YBR246W	YBR246W	YGR035C	YGR035C	0.119
YBR246W	YBR246W	YMR155W	YMR155W	0.119
YBR246W	YBR246W	YPR198W	SGE1	0.119
YBR246W	YBR246W	YPL107W	YPL107W	0.118
YBR246W	YBR246W	YDR277C	MTH1	0.117
YBR246W	YBR246W	YER152C	YER152C	0.117
YBR246W	YBR246W	YHR057C	CPR2	0.117
YBR246W	YBR246W	YLR248W	RCK2	0.117
YBR246W	YBR246W	YNR049C	MSO1	0.117
YBR246W	YBR246W	YBR164C	ARL1	0.116
YBR246W	YBR246W	YBR188C	NTC20	0.116
YBR246W	YBR246W	YCR030C	SYP1	0.116
YBR246W	YBR246W	YCR092C	MSH3	0.116
YBR246W	YBR246W	YMR164C	MSS11	0.116
YBR246W	YBR246W	YBR042C	CST26	0.115
YBR246W	YBR246W	YBR176W	ECM31	0.115
YBR246W	YBR246W	YGR022C	YGR022C	0.115
YBR246W	YBR246W	YBR294W	SUL1	0.114
YBR246W	YBR246W	YCR079W	PTC6	0.114
YBR246W	YBR246W	YIL064W	SEE1	0.114
YBR246W	YBR246W	YML008C	ERG6	0.114
YBR246W	YBR246W	YOR269W	PAC1	0.113
YBR246W	YBR246W	YNR015W	SMM1	0.112
YBR246W	YBR246W	YPL219W	PCL8	0.112
YBR246W	YBR246W	YAL018C	YAL018C	0.111
YBR246W	YBR246W	YDR250C	YDR250C	0.111
YBR246W	YBR246W	YHR123W	EPT1	0.111
YBR246W	YBR246W	YKR050W	TRK2	0.111
YBR246W	YBR246W	YPL170W	DAP1	0.111
YBR246W	YBR246W	YPL260W	YPL260W	0.111
YBR246W	YBR246W	YCR048W	ARE1	0.11
YBR246W	YBR246W	YDL161W	ENT1	0.11
YBR246W	YBR246W	YKR024C	DBP7	0.11
YBR246W	YBR246W	YNL147W	LSM7	0.11
YBR246W	YBR246W	YHL017W	YHL017W	0.109
YBR246W	YBR246W	YOL086C	ADH1	0.109
YBR246W	YBR246W	YER150W	SPI1	0.108
YBR246W	YBR246W	YJL216C	YJL216C	0.108
YBR246W	YBR246W	YJR100C	AIM25	0.108
YBR246W	YBR246W	YBR022W	POA1	0.107
YBR246W	YBR246W	YER071C	YER071C	0.107
YBR246W	YBR246W	YGR178C	PBP1	0.107
YBR246W	YBR246W	YJL215C	YJL215C	0.107
YBR246W	YBR246W	YLR053C	YLR053C	0.107
YBR246W	YBR246W	YNL119W	NCS2	0.107
YBR246W	YBR246W	YBL078C	ATG8	0.106
YBR246W	YBR246W	YFR022W	ROG3	0.106
YBR246W	YBR246W	YLR443W	ECM7	0.106
YBR246W	YBR246W	YER087C-A	YER087C-A	0.105
YBR246W	YBR246W	YGL221C	NIF3	0.105
YBR246W	YBR246W	YKL043W	PHD1	0.105
YBR246W	YBR246W	YLR422W	YLR422W	0.105
YBR246W	YBR246W	YMR099C	YMR099C	0.105
YBR246W	YBR246W	YNL001W	DOM34	0.105
YBR246W	YBR246W	YNL028W	YNL028W	0.105
YBR246W	YBR246W	YAL068C	PAU8	0.104
YBR246W	YBR246W	YDR425W	SNX41	0.104
YBR246W	YBR246W	YKL085W	MDH1	0.104
YBR246W	YBR246W	YPL057C	SUR1	0.104
YBR246W	YBR246W	YPR068C	HOS1	0.104
YBR246W	YBR246W	YHL012W	YHL012W	0.103
YBR246W	YBR246W	YIR016W	YIR016W	0.103
YBR246W	YBR246W	YLR035C	MLH2	0.103
YBR246W	YBR246W	YNR047W	FPK1	0.103
YBR246W	YBR246W	YPR007C	REC8	0.103
YBR246W	YBR246W	YCR102W-A	YCR102W-A	0.102
YBR246W	YBR246W	YDR220C	YDR220C	0.102
YBR246W	YBR246W	YFR026C	ULI1	0.102
YBR246W	YBR246W	YJL193W	YJL193W	0.102
YBR246W	YBR246W	YLR389C	STE23	0.102
YBR246W	YBR246W	YNL029C	KTR5	0.102
YBR246W	YBR246W	YNR034W	SOL1	0.102
YBR246W	YBR246W	YKL086W	SRX1	0.101
YBR246W	YBR246W	YMR027W	YMR027W	0.101
YBR246W	YBR246W	YOL105C	WSC3	0.101
YBR246W	YBR246W	YPR117W	YPR117W	0.101
YBR246W	YBR246W	YDR229W	IVY1	0.1
YBR246W	YBR246W	YHR189W	PTH1	0.1
YBR246W	YBR246W	YLR380W	CSR1	0.1
YBR246W	YBR246W	YPR170C	YPR170C	0.1
YBR246W	YBR246W	YCR090C	YCR090C	0.099
YBR246W	YBR246W	YPL270W	MDL2	0.099
YBR246W	YBR246W	YPR042C	PUF2	0.098
YBR246W	YBR246W	YDR535C	YDR535C	0.097
YBR246W	YBR246W	YFL031W	HAC1	0.097
YBR246W	YBR246W	YHR075C	PPE1	0.097
YBR246W	YBR246W	YJL151C	SNA3	0.097
YBR246W	YBR246W	YLR415C	YLR415C	0.097
YBR246W	YBR246W	YCL014W	BUD3	0.096
YBR246W	YBR246W	YGR194C	XKS1	0.096
YBR246W	YBR246W	YDL194W	SNF3	0.095
YBR246W	YBR246W	YGL209W	MIG2	0.095
YBR246W	YBR246W	YLR253W	YLR253W	0.095
YBR246W	YBR246W	YNL012W	SPO1	0.095
YBR246W	YBR246W	YNR055C	HOL1	0.095
YBR246W	YBR246W	YBL098W	BNA4	0.094
YBR246W	YBR246W	YCR010C	ADY2	0.094
YBR246W	YBR246W	YHR121W	LSM12	0.094
YBR246W	YBR246W	YJL117W	PHO86	0.094
YBR246W	YBR246W	YML037C	YML037C	0.094
YBR246W	YBR246W	YDR216W	ADR1	0.093
YBR246W	YBR246W	YIR007W	YIR007W	0.093
YBR246W	YBR246W	YLR332W	MID2	0.093
YBR246W	YBR246W	YPR051W	MAK3	0.093
YBR246W	YBR246W	YCR082W	AHC2	0.092
YBR246W	YBR246W	YDR247W	VHS1	0.092
YBR246W	YBR246W	YFR013W	IOC3	0.092
YBR246W	YBR246W	YHR209W	CRG1	0.092
YBR246W	YBR246W	YMR127C	SAS2	0.092
YBR246W	YBR246W	YOL054W	PSH1	0.092
YBR246W	YBR246W	YOR366W	YOR366W	0.092
YBR246W	YBR246W	YBR119W	MUD1	0.091
YBR246W	YBR246W	YJR050W	ISY1	0.091
YBR246W	YBR246W	YMR018W	YMR018W	0.091
YBR246W	YBR246W	YPL155C	KIP2	0.091
YBR246W	YBR246W	YPL247C	YPL247C	0.091
YBR246W	YBR246W	YBR064W	YBR064W	0.09
YBR246W	YBR246W	YCL023C	YCL023C	0.09
YBR246W	YBR246W	YDL127W	PCL2	0.09
YBR246W	YBR246W	YGL162W	SUT1	0.09
YBR246W	YBR246W	YGL257C	MNT2	0.09
YBR246W	YBR246W	YGR270W	YTA7	0.09
YBR246W	YBR246W	YLR085C	ARP6	0.09
YBR246W	YBR246W	YNL155W	YNL155W	0.09
YBR246W	YBR246W	YPR014C	YPR014C	0.09
YBR246W	YBR246W	YBR132C	AGP2	0.089
YBR246W	YBR246W	YBR210W	ERV15	0.089
YBR246W	YBR246W	YBR250W	SPO23	0.089
YBR246W	YBR246W	YCR027C	RHB1	0.089
YBR246W	YBR246W	YER109C	FLO8	0.089
YBR246W	YBR246W	YGR067C	YGR067C	0.089
YBR246W	YBR246W	YLR015W	BRE2	0.089
YBR246W	YBR246W	YLR413W	YLR413W	0.089
YBR246W	YBR246W	YOL017W	ESC8	0.089
YBR246W	YBR246W	YOR248W	YOR248W	0.089
YBR246W	YBR246W	YPL224C	MMT2	0.089
YBR246W	YBR246W	YPR193C	HPA2	0.089
YBR246W	YBR246W	YAL042W	ERV46	0.088
YBR246W	YBR246W	YCL024W	KCC4	0.088
YBR246W	YBR246W	YDR451C	YHP1	0.088
YBR246W	YBR246W	YLR432W	IMD3	0.088
YBR246W	YBR246W	YMR209C	YMR209C	0.088
YBR246W	YBR246W	YNL080C	EOS1	0.088
YBR246W	YBR246W	YNR022C	MRPL50	0.088
YBR246W	YBR246W	YOR139C	YOR139C	0.088
YBR246W	YBR246W	YBR139W	YBR139W	0.087
YBR246W	YBR246W	YBR233W	PBP2	0.087
YBR246W	YBR246W	YDR305C	HNT2	0.087
YBR246W	YBR246W	YFL041W	FET5	0.087
YBR246W	YBR246W	YHR032W	YHR032W	0.087
YBR246W	YBR246W	YJR066W	TOR1	0.087
YBR246W	YBR246W	YOR351C	MEK1	0.087
YBR246W	YBR246W	YAL028W	FRT2	0.086
YBR246W	YBR246W	YDR057W	YOS9	0.086
YBR246W	YBR246W	YDR422C	SIP1	0.086
YBR246W	YBR246W	YPR127W	YPR127W	0.086
YBR246W	YBR246W	YCR045C	YCR045C	0.085
YBR246W	YBR246W	YCR073C	SSK22	0.085
YBR246W	YBR246W	YFR034C	PHO4	0.085
YBR246W	YBR246W	YFR039C	YFR039C	0.085
YBR246W	YBR246W	YGL235W	YGL235W	0.085
YBR246W	YBR246W	YHR015W	MIP6	0.085
YBR246W	YBR246W	YMR080C	NAM7	0.085
YBR246W	YBR246W	YOR230W	WTM1	0.085
YBR246W	YBR246W	YDR378C	LSM6	0.084
YBR246W	YBR246W	YER118C	SHO1	0.084
YBR246W	YBR246W	YGL037C	PNC1	0.084
YBR246W	YBR246W	YGL197W	MDS3	0.084
YBR246W	YBR246W	YGL226C-A	OST5	0.084
YBR246W	YBR246W	YIL009C-A	EST3	0.084
YBR246W	YBR246W	YKL206C	ADD66	0.084
YBR246W	YBR246W	YML117W-A	YML117W-A	0.084
YBR246W	YBR246W	YMR009W	ADI1	0.084
YBR246W	YBR246W	YCR087W	YCR087W	0.083
YBR246W	YBR246W	YHR157W	REC104	0.083
YBR246W	YBR246W	YIL065C	FIS1	0.083
YBR246W	YBR246W	YKL070W	YKL070W	0.083
YBR246W	YBR246W	YLR146C	SPE4	0.083
YBR246W	YBR246W	YLR456W	YLR456W	0.083
YBR246W	YBR246W	YNR025C	YNR025C	0.083
YBR246W	YBR246W	YOR229W	WTM2	0.083
YBR246W	YBR246W	YPR171W	BSP1	0.083
YBR246W	YBR246W	YBR046C	ZTA1	0.082
YBR246W	YBR246W	YDR032C	PST2	0.082
YBR246W	YBR246W	YDR120C	TRM1	0.082
YBR246W	YBR246W	YFL046W	FMP32	0.082
YBR246W	YBR246W	YGR043C	NQM1	0.082
YBR246W	YBR246W	YGR050C	YGR050C	0.082
YBR246W	YBR246W	YJL213W	YJL213W	0.082
YBR246W	YBR246W	YML119W	YML119W	0.082
YBR246W	YBR246W	YMR163C	INP2	0.082
YBR246W	YBR246W	YBL001C	ECM15	0.081
YBR246W	YBR246W	YER155C	BEM2	0.081
YBR246W	YBR246W	YFL021W	GAT1	0.081
YBR246W	YBR246W	YHR048W	YHK8	0.081
YBR246W	YBR246W	YJR020W	YJR020W	0.081
YBR246W	YBR246W	YKL120W	OAC1	0.081
YBR246W	YBR246W	YLL061W	MMP1	0.081
YBR246W	YBR246W	YLR151C	PCD1	0.081
YBR246W	YBR246W	YLR219W	MSC3	0.081
YBR246W	YBR246W	YNL066W	SUN4	0.081
YBR246W	YBR246W	YOL036W	YOL036W	0.081
YBR246W	YBR246W	YDL050C	YDL050C	0.08
YBR246W	YBR246W	YDL241W	YDL241W	0.08
YBR246W	YBR246W	YDR207C	UME6	0.08
YBR246W	YBR246W	YGR292W	MAL12	0.08
YBR246W	YBR246W	YHR161C	YAP1801	0.08
YBR246W	YBR246W	YJL152W	YJL152W	0.08
YBR246W	YBR246W	YLL043W	FPS1	0.08
YBR246W	YBR246W	YLR297W	YLR297W	0.08
YBR246W	YBR246W	YLR416C	YLR416C	0.08
YBR246W	YBR246W	YMR106C	YKU80	0.08
YBR246W	YBR246W	YGR031W	YGR031W	0.079
YBR246W	YBR246W	YHR095W	YHR095W	0.079
YBR246W	YBR246W	YIL073C	SPO22	0.079
YBR246W	YBR246W	YJL106W	IME2	0.079
YBR246W	YBR246W	YJL136C	RPS21B	0.079
YBR246W	YBR246W	YNL100W	AIM37	0.079
YBR246W	YBR246W	YOR197W	MCA1	0.079
YBR246W	YBR246W	YPL032C	SVL3	0.079
YBR246W	YBR246W	YAR042W	SWH1	0.078
YBR246W	YBR246W	YDL223C	HBT1	0.078
YBR246W	YBR246W	YDL224C	WHI4	0.078
YBR246W	YBR246W	YDR233C	RTN1	0.078
YBR246W	YBR246W	YDR321W	ASP1	0.078
YBR246W	YBR246W	YDR536W	STL1	0.078
YBR246W	YBR246W	YFL027C	GYP8	0.078
YBR246W	YBR246W	YGL210W	YPT32	0.078
YBR246W	YBR246W	YGL261C	PAU11	0.078
YBR246W	YBR246W	YGR225W	AMA1	0.078
YBR246W	YBR246W	YOR283W	YOR283W	0.078
YBR246W	YBR246W	YPR150W	YPR150W	0.078
YBR246W	YBR246W	YBR276C	PPS1	0.077
YBR246W	YBR246W	YCR061W	YCR061W	0.077
YBR246W	YBR246W	YCR067C	SED4	0.077
YBR246W	YBR246W	YER091C-A	YER091C-A	0.077
YBR246W	YBR246W	YFL030W	AGX1	0.077
YBR246W	YBR246W	YGR230W	BNS1	0.077
YBR246W	YBR246W	YHR111W	UBA4	0.077
YBR246W	YBR246W	YJL067W	YJL067W	0.077
YBR246W	YBR246W	YKL001C	MET14	0.077
YBR246W	YBR246W	YNL043C	YNL043C	0.077
YBR246W	YBR246W	YBL062W	YBL062W	0.076
YBR246W	YBR246W	YBR083W	TEC1	0.076
YBR246W	YBR246W	YDR395W	SXM1	0.076
YBR246W	YBR246W	YHL014C	YLF2	0.076
YBR246W	YBR246W	YIR025W	MND2	0.076
YBR246W	YBR246W	YLR064W	YLR064W	0.076
YBR246W	YBR246W	YMR103C	YMR103C	0.076
YBR246W	YBR246W	YPR002W	PDH1	0.076
YBR246W	YBR246W	YPR023C	EAF3	0.076
YBR246W	YBR246W	YDL204W	RTN2	0.075
YBR246W	YBR246W	YDR349C	YPS7	0.075
YBR246W	YBR246W	YDR426C	YDR426C	0.075
YBR246W	YBR246W	YGR139W	YGR139W	0.075
YBR246W	YBR246W	YHL045W	YHL045W	0.075
YBR246W	YBR246W	YMR317W	YMR317W	0.075
YBR246W	YBR246W	YNL120C	YNL120C	0.075
YBR246W	YBR246W	YBL048W	RRT1	0.074
YBR246W	YBR246W	YBR082C	UBC4	0.074
YBR246W	YBR246W	YBR277C	YBR277C	0.074
YBR246W	YBR246W	YCR016W	YCR016W	0.074
YBR246W	YBR246W	YFL020C	PAU5	0.074
YBR246W	YBR246W	YKR048C	NAP1	0.074
YBR246W	YBR246W	YML021C	UNG1	0.074
YBR246W	YBR246W	YMR004W	MVP1	0.074
YBR246W	YBR246W	YMR207C	HFA1	0.074
YBR246W	YBR246W	YOL052C	SPE2	0.074
YBR246W	YBR246W	YOR171C	LCB4	0.074
YBR246W	YBR246W	YOR322C	LDB19	0.074
YBR246W	YBR246W	YOR364W	YOR364W	0.074
YBR246W	YBR246W	YPL034W	YPL034W	0.074
YBR246W	YBR246W	YPR111W	DBF20	0.074
YBR246W	YBR246W	YBR284W	YBR284W	0.073
YBR246W	YBR246W	YCL029C	BIK1	0.073
YBR246W	YBR246W	YCR025C	YCR025C	0.073
YBR246W	YBR246W	YCR034W	FEN1	0.073
YBR246W	YBR246W	YDR340W	YDR340W	0.073
YBR246W	YBR246W	YER062C	HOR2	0.073
YBR246W	YBR246W	YER181C	YER181C	0.073
YBR246W	YBR246W	YGL086W	MAD1	0.073
YBR246W	YBR246W	YNR075W	COS10	0.073
YBR246W	YBR246W	YOR012W	YOR012W	0.073
YBR246W	YBR246W	YPR037C	ERV2	0.073
YBR246W	YBR246W	YCR098C	GIT1	0.072
YBR246W	YBR246W	YGR107W	YGR107W	0.072
YBR246W	YBR246W	YHR210C	YHR210C	0.072
YBR246W	YBR246W	YIL029C	YIL029C	0.072
YBR246W	YBR246W	YIL149C	MLP2	0.072
YBR246W	YBR246W	YJL094C	KHA1	0.072
YBR246W	YBR246W	YML035C-A	YML035C-A	0.072
YBR246W	YBR246W	YMR262W	YMR262W	0.072
YBR246W	YBR246W	YPL180W	TCO89	0.072
YBR246W	YBR246W	YPR024W	YME1	0.072
YBR246W	YBR246W	YPR109W	YPR109W	0.072
YBR246W	YBR246W	YCR049C	YCR049C	0.071
YBR246W	YBR246W	YDR077W	SED1	0.071
YBR246W	YBR246W	YDR205W	MSC2	0.071
YBR246W	YBR246W	YGL118C	YGL118C	0.071
YBR246W	YBR246W	YHR133C	NSG1	0.071
YBR246W	YBR246W	YMR092C	AIP1	0.071
YBR246W	YBR246W	YPL051W	ARL3	0.071
YBR246W	YBR246W	YPR122W	AXL1	0.071
YBR246W	YBR246W	YAL058C-A	YAL058C-A	0.07
YBR246W	YBR246W	YAR030C	YAR030C	0.07
YBR246W	YBR246W	YBR001C	NTH2	0.07
YBR246W	YBR246W	YBR274W	CHK1	0.07
YBR246W	YBR246W	YCL062W	YCL062W	0.07
YBR246W	YBR246W	YDR445C	YDR445C	0.07
YBR246W	YBR246W	YIL163C	YIL163C	0.07
YBR246W	YBR246W	YKL140W	TGL1	0.07
YBR246W	YBR246W	YLL057C	JLP1	0.07
YBR246W	YBR246W	YLL063C	AYT1	0.07
YBR246W	YBR246W	YML059C	NTE1	0.07
YBR246W	YBR246W	YMR253C	YMR253C	0.07
YBR246W	YBR246W	YMR313C	TGL3	0.07
YBR246W	YBR246W	YNR002C	ATO2	0.07
YBR246W	YBR246W	YOR185C	GSP2	0.07
YBR246W	YBR246W	YBR023C	CHS3	0.069
YBR246W	YBR246W	YBR171W	SEC66	0.069
YBR246W	YBR246W	YCL028W	RNQ1	0.069
YBR246W	YBR246W	YCR022C	YCR022C	0.069
YBR246W	YBR246W	YCR091W	KIN82	0.069
YBR246W	YBR246W	YDL001W	RMD1	0.069
YBR246W	YBR246W	YDR524C	AGE1	0.069
YBR246W	YBR246W	YFR048W	RMD8	0.069
YBR246W	YBR246W	YGL042C	YGL042C	0.069
YBR246W	YBR246W	YGL121C	GPG1	0.069
YBR246W	YBR246W	YGR284C	ERV29	0.069
YBR246W	YBR246W	YJL020C	BBC1	0.069
YBR246W	YBR246W	YJL212C	OPT1	0.069
YBR246W	YBR246W	YLR236C	YLR236C	0.069
YBR246W	YBR246W	YMR232W	FUS2	0.069
YBR246W	YBR246W	YNR028W	CPR8	0.069
YBR246W	YBR246W	YOL103W	ITR2	0.069
YBR246W	YBR246W	YOR043W	WHI2	0.069
YBR246W	YBR246W	YOR133W	EFT1	0.069
YBR246W	YBR246W	YOR284W	HUA2	0.069
YBR246W	YBR246W	YBR090C	YBR090C	0.068
YBR246W	YBR246W	YDL179W	PCL9	0.068
YBR246W	YBR246W	YDL210W	UGA4	0.068
YBR246W	YBR246W	YGL014W	PUF4	0.068
YBR246W	YBR246W	YJL198W	PHO90	0.068
YBR246W	YBR246W	YKL091C	YKL091C	0.068
YBR246W	YBR246W	YLR120C	YPS1	0.068
YBR246W	YBR246W	YLR334C	YLR334C	0.068
YBR246W	YBR246W	YMR002W	MIC17	0.068
YBR246W	YBR246W	YOL045W	PSK2	0.068
YBR246W	YBR246W	YOL104C	NDJ1	0.068
YBR246W	YBR246W	YPL086C	ELP3	0.068
YBR246W	YBR246W	YPL114W	YPL114W	0.068
YBR246W	YBR246W	YPR185W	ATG13	0.068
YBR246W	YBR246W	YPR188C	MLC2	0.068
YBR246W	YBR246W	YPR201W	ARR3	0.068
YBR246W	YBR246W	YBR036C	CSG2	0.067
YBR246W	YBR246W	YDL131W	LYS21	0.067
YBR246W	YBR246W	YER124C	DSE1	0.067
YBR246W	YBR246W	YGL139W	FLC3	0.067
YBR246W	YBR246W	YHR003C	YHR003C	0.067
YBR246W	YBR246W	YLR012C	YLR012C	0.067
YBR246W	YBR246W	YLR446W	YLR446W	0.067
YBR246W	YBR246W	YML072C	TCB3	0.067
YBR246W	YBR246W	YBL031W	SHE1	0.066
YBR246W	YBR246W	YDL081C	RPP1A	0.066
YBR246W	YBR246W	YDR183W	PLP1	0.066
YBR246W	YBR246W	YDR385W	EFT2	0.066
YBR246W	YBR246W	YGR014W	MSB2	0.066
YBR246W	YBR246W	YJR025C	BNA1	0.066
YBR246W	YBR246W	YKR069W	MET1	0.066
YBR246W	YBR246W	YLL056C	YLL056C	0.066
YBR246W	YBR246W	YLR412W	BER1	0.066
YBR246W	YBR246W	YML029W	USA1	0.066
YBR246W	YBR246W	YMR226C	TMA29	0.066
YBR246W	YBR246W	YNR024W	MPP6	0.066
YBR246W	YBR246W	YOR226C	ISU2	0.066
YBR246W	YBR246W	YPL145C	KES1	0.066
YBR246W	YBR246W	YPR145W	ASN1	0.066
YBR246W	YBR246W	YBL053W	YBL053W	0.065
YBR246W	YBR246W	YDL089W	NUR1	0.065
YBR246W	YBR246W	YER180C	ISC10	0.065
YBR246W	YBR246W	YFL032W	YFL032W	0.065
YBR246W	YBR246W	YGL045W	RIM8	0.065
YBR246W	YBR246W	YGL208W	SIP2	0.065
YBR246W	YBR246W	YGR124W	ASN2	0.065
YBR246W	YBR246W	YIL099W	SGA1	0.065
YBR246W	YBR246W	YJL206C	YJL206C	0.065
YBR246W	YBR246W	YLR224W	YLR224W	0.065
YBR246W	YBR246W	YMR320W	YMR320W	0.065
YBR246W	YBR246W	YNL037C	IDH1	0.065
YBR246W	YBR246W	YNR042W	YNR042W	0.065
YBR246W	YBR246W	YOR240W	YOR240W	0.065
YBR246W	YBR246W	YPL137C	GIP3	0.065
YBR246W	YBR246W	YPL253C	VIK1	0.065
YBR246W	YBR246W	YAL011W	SWC3	0.064
YBR246W	YBR246W	YBR162C	TOS1	0.064
YBR246W	YBR246W	YBR260C	RGD1	0.064
YBR246W	YBR246W	YDL144C	YDL144C	0.064
YBR246W	YBR246W	YDR209C	YDR209C	0.064
YBR246W	YBR246W	YDR352W	YDR352W	0.064
YBR246W	YBR246W	YHR079C	IRE1	0.064
YBR246W	YBR246W	YIL054W	YIL054W	0.064
YBR246W	YBR246W	YJL016W	YJL016W	0.064
YBR246W	YBR246W	YJL107C	YJL107C	0.064
YBR246W	YBR246W	YJR014W	TMA22	0.064
YBR246W	YBR246W	YKL124W	SSH4	0.064
YBR246W	YBR246W	YKL168C	KKQ8	0.064
YBR246W	YBR246W	YML057W	CMP2	0.064
YBR246W	YBR246W	YMR019W	STB4	0.064
YBR246W	YBR246W	YMR031C	YMR031C	0.064
YBR246W	YBR246W	YMR126C	DLT1	0.064
YBR246W	YBR246W	YNR062C	YNR062C	0.064
YBR246W	YBR246W	YPL150W	YPL150W	0.064
YBR246W	YBR246W	YBR286W	APE3	0.063
YBR246W	YBR246W	YCL076W	YCL076W	0.063
YBR246W	YBR246W	YCR015C	YCR015C	0.063
YBR246W	YBR246W	YGR271W	SLH1	0.063
YBR246W	YBR246W	YKL162C	YKL162C	0.063
YBR246W	YBR246W	YLR311C	YLR311C	0.063
YBR246W	YBR246W	YNR059W	MNT4	0.063
YBR246W	YBR246W	YOR268C	YOR268C	0.063
YBR246W	YBR246W	YOR309C	YOR309C	0.063
YBR246W	YBR246W	YBL067C	UBP13	0.062
YBR246W	YBR246W	YCR020C	PET18	0.062
YBR246W	YBR246W	YCR083W	TRX3	0.062
YBR246W	YBR246W	YER042W	MXR1	0.062
YBR246W	YBR246W	YGL211W	NCS6	0.062
YBR246W	YBR246W	YLR043C	TRX1	0.062
YBR246W	YBR246W	YLR072W	YLR072W	0.062
YBR246W	YBR246W	YMR302C	YME2	0.062
YBR246W	YBR246W	YBR225W	YBR225W	0.061
YBR246W	YBR246W	YBR300C	YBR300C	0.061
YBR246W	YBR246W	YFL052W	YFL052W	0.061
YBR246W	YBR246W	YHL010C	BRP2	0.061
YBR246W	YBR246W	YJR117W	STE24	0.061
YBR246W	YBR246W	YLR325C	RPL38	0.061
YBR246W	YBR246W	YLR387C	REH1	0.061
YBR246W	YBR246W	YLR450W	HMG2	0.061
YBR246W	YBR246W	YML060W	OGG1	0.061
YBR246W	YBR246W	YMR040W	YET2	0.061
YBR246W	YBR246W	YMR138W	CIN4	0.061
YBR246W	YBR246W	YOL063C	CRT10	0.061
YBR246W	YBR246W	YOR175C	ALE1	0.061
YBR246W	YBR246W	YOR188W	MSB1	0.061
YBR246W	YBR246W	YOR298W	MUM3	0.061
YBR246W	YBR246W	YOR325W	YOR325W	0.061
YBR246W	YBR246W	YPL120W	VPS30	0.061
YBR246W	YBR246W	YPL223C	GRE1	0.061
YBR246W	YBR246W	YBR134W	YBR134W	0.06
YBR246W	YBR246W	YCL064C	CHA1	0.06
YBR246W	YBR246W	YDR281C	PHM6	0.06
YBR246W	YBR246W	YDR516C	EMI2	0.06
YBR246W	YBR246W	YGL226W	MTC3	0.06
YBR246W	YBR246W	YGR077C	PEX8	0.06
YBR246W	YBR246W	YGR199W	PMT6	0.06
YBR246W	YBR246W	YGR286C	BIO2	0.06
YBR246W	YBR246W	YHR104W	GRE3	0.06
YBR246W	YBR246W	YIL053W	RHR2	0.06
YBR246W	YBR246W	YJL038C	LOH1	0.06
YBR246W	YBR246W	YJL049W	YJL049W	0.06
YBR246W	YBR246W	YKL056C	TMA19	0.06
YBR246W	YBR246W	YML076C	WAR1	0.06
YBR246W	YBR246W	YML102C-A	YML102C-A	0.06
YBR246W	YBR246W	YNL063W	MTQ1	0.06
YBR246W	YBR246W	YOR140W	SFL1	0.06
YBR246W	YBR246W	YOR334W	MRS2	0.06
YBR246W	YBR246W	YOR386W	PHR1	0.06
YBR246W	YBR246W	YPL263C	KEL3	0.06
YBR246W	YBR246W	YPR073C	LTP1	0.06
YBR246W	YBR246W	YBR086C	IST2	0.059
YBR246W	YBR246W	YCR059C	YIH1	0.059
YBR246W	YBR246W	YDR379W	RGA2	0.059
YBR246W	YBR246W	YDR391C	YDR391C	0.059
YBR246W	YBR246W	YER163C	YER163C	0.059
YBR246W	YBR246W	YGR072W	UPF3	0.059
YBR246W	YBR246W	YKL190W	CNB1	0.059
YBR246W	YBR246W	YLL010C	PSR1	0.059
YBR246W	YBR246W	YLR021W	IRC25	0.059
YBR246W	YBR246W	YLR418C	CDC73	0.059
YBR246W	YBR246W	YOR061W	CKA2	0.059
YBR246W	YBR246W	YOR239W	ABP140	0.059
YBR246W	YBR246W	YOR306C	MCH5	0.059
YBR246W	YBR246W	YPL103C	FMP30	0.059
YBR246W	YBR246W	YPL222W	FMP40	0.059
YBR246W	YBR246W	YBR201W	DER1	0.058
YBR246W	YBR246W	YDL083C	RPS16B	0.058
YBR246W	YBR246W	YGL222C	EDC1	0.058
YBR246W	YBR246W	YGR187C	HGH1	0.058
YBR246W	YBR246W	YHL036W	MUP3	0.058
YBR246W	YBR246W	YHL043W	ECM34	0.058
YBR246W	YBR246W	YLR070C	XYL2	0.058
YBR246W	YBR246W	YMR172W	HOT1	0.058
YBR246W	YBR246W	YOL090W	MSH2	0.058
YBR246W	YBR246W	YOL110W	SHR5	0.058
YBR246W	YBR246W	YOR070C	GYP1	0.058
YBR246W	YBR246W	YOR252W	TMA16	0.058
YBR246W	YBR246W	YPL087W	YDC1	0.058
YBR246W	YBR246W	YPL157W	TGS1	0.058
YBR246W	YBR246W	YBR033W	EDS1	0.057
YBR246W	YBR246W	YBR053C	YBR053C	0.057
YBR246W	YBR246W	YBR182C	SMP1	0.057
YBR246W	YBR246W	YCL027W	FUS1	0.057
YBR246W	YBR246W	YDL215C	GDH2	0.057
YBR246W	YBR246W	YDR007W	TRP1	0.057
YBR246W	YBR246W	YDR131C	YDR131C	0.057
YBR246W	YBR246W	YDR198C	RKM2	0.057
YBR246W	YBR246W	YDR265W	PEX10	0.057
YBR246W	YBR246W	YDR351W	SBE2	0.057
YBR246W	YBR246W	YDR475C	JIP4	0.057
YBR246W	YBR246W	YDR485C	VPS72	0.057
YBR246W	YBR246W	YGL015C	YGL015C	0.057
YBR246W	YBR246W	YGR087C	PDC6	0.057
YBR246W	YBR246W	YGR201C	YGR201C	0.057
YBR246W	YBR246W	YHR153C	SPO16	0.057
YBR246W	YBR246W	YIL122W	POG1	0.057
YBR246W	YBR246W	YIL137C	TMA108	0.057
YBR246W	YBR246W	YKL068W	NUP100	0.057
YBR246W	YBR246W	YKR065C	PAM17	0.057
YBR246W	YBR246W	YLR016C	PML1	0.057
YBR246W	YBR246W	YLR194C	YLR194C	0.057
YBR246W	YBR246W	YMR129W	POM152	0.057
YBR246W	YBR246W	YOL057W	YOL057W	0.057
YBR246W	YBR246W	YOR050C	YOR050C	0.057
YBR246W	YBR246W	YPR008W	HAA1	0.057
YBR246W	YBR246W	YBR073W	RDH54	0.056
YBR246W	YBR246W	YDR371W	CTS2	0.056
YBR246W	YBR246W	YER056C	FCY2	0.056
YBR246W	YBR246W	YGR040W	KSS1	0.056
YBR246W	YBR246W	YHL006C	SHU1	0.056
YBR246W	YBR246W	YHR006W	STP2	0.056
YBR246W	YBR246W	YHR110W	ERP5	0.056
YBR246W	YBR246W	YIL117C	PRM5	0.056
YBR246W	YBR246W	YKR019C	IRS4	0.056
YBR246W	YBR246W	YLR214W	FRE1	0.056
YBR246W	YBR246W	YML012W	ERV25	0.056
YBR246W	YBR246W	YMR052C-A	YMR052C-A	0.056
YBR246W	YBR246W	YMR107W	SPG4	0.056
YBR246W	YBR246W	YMR119W	ASI1	0.056
YBR246W	YBR246W	YNL146W	YNL146W	0.056
YBR246W	YBR246W	YOL101C	IZH4	0.056
YBR246W	YBR246W	YPL127C	HHO1	0.056
YBR246W	YBR246W	YPL179W	PPQ1	0.056
YBR246W	YBR246W	YAR002C-A	ERP1	0.055
YBR246W	YBR246W	YAR044W	YAR044W	0.055
YBR246W	YBR246W	YBR239C	ERT1	0.055
YBR246W	YBR246W	YDR333C	YDR333C	0.055
YBR246W	YBR246W	YFL049W	SWP82	0.055
YBR246W	YBR246W	YGL179C	TOS3	0.055
YBR246W	YBR246W	YGR276C	RNH70	0.055
YBR246W	YBR246W	YHR059W	FYV4	0.055
YBR246W	YBR246W	YJL013C	MAD3	0.055
YBR246W	YBR246W	YKL065C	YET1	0.055
YBR246W	YBR246W	YKR035C	OPI8	0.055
YBR246W	YBR246W	YLL012W	YEH1	0.055
YBR246W	YBR246W	YLR080W	EMP46	0.055
YBR246W	YBR246W	YLR238W	FAR10	0.055
YBR246W	YBR246W	YML071C	COG8	0.055
YBR246W	YBR246W	YMR166C	YMR166C	0.055
YBR246W	YBR246W	YNR001C	CIT1	0.055
YBR246W	YBR246W	YNR061C	YNR061C	0.055
YBR246W	YBR246W	YOL046C	YOL046C	0.055
YBR246W	YBR246W	YOR280C	FSH3	0.055
YBR246W	YBR246W	YPR125W	YLH47	0.055
YBR246W	YBR246W	YBR007C	DSF2	0.054
YBR246W	YBR246W	YBR147W	RTC2	0.054
YBR246W	YBR246W	YBR273C	UBX7	0.054
YBR246W	YBR246W	YDR260C	SWM1	0.054
YBR246W	YBR246W	YFL042C	YFL042C	0.054
YBR246W	YBR246W	YGL094C	PAN2	0.054
YBR246W	YBR246W	YHL044W	YHL044W	0.054
YBR246W	YBR246W	YHR028C	DAP2	0.054
YBR246W	YBR246W	YHR142W	CHS7	0.054
YBR246W	YBR246W	YHR167W	THP2	0.054
YBR246W	YBR246W	YJL112W	MDV1	0.054
YBR246W	YBR246W	YJL168C	SET2	0.054
YBR246W	YBR246W	YKL158W	YKL158W	0.054
YBR246W	YBR246W	YLR372W	SUR4	0.054
YBR246W	YBR246W	YLR431C	ATG23	0.054
YBR246W	YBR246W	YPL052W	OAZ1	0.054
YBR246W	YBR246W	YBR129C	OPY1	0.053
YBR246W	YBR246W	YBR218C	PYC2	0.053
YBR246W	YBR246W	YBR229C	ROT2	0.053
YBR246W	YBR246W	YDL038C	YDL038C	0.053
YBR246W	YBR246W	YDR063W	AIM7	0.053
YBR246W	YBR246W	YDR159W	SAC3	0.053
YBR246W	YBR246W	YDR215C	YDR215C	0.053
YBR246W	YBR246W	YDR256C	CTA1	0.053
YBR246W	YBR246W	YGL232W	TAN1	0.053
YBR246W	YBR246W	YIL042C	PKP1	0.053
YBR246W	YBR246W	YIL152W	YIL152W	0.053
YBR246W	YBR246W	YLR199C	PBA1	0.053
YBR246W	YBR246W	YML052W	SUR7	0.053
YBR246W	YBR246W	YPL229W	YPL229W	0.053
YBR246W	YBR246W	YPL272C	YPL272C	0.053
YBR246W	YBR246W	YPR076W	YPR076W	0.053
YBR246W	YBR246W	YPR196W	YPR196W	0.053
YBR246W	YBR246W	YCL044C	MGR1	0.052
YBR246W	YBR246W	YDL134C	PPH21	0.052
YBR246W	YBR246W	YDR107C	TMN2	0.052
YBR246W	YBR246W	YDR290W	YDR290W	0.052
YBR246W	YBR246W	YGL125W	MET13	0.052
YBR246W	YBR246W	YHR176W	FMO1	0.052
YBR246W	YBR246W	YHR184W	SSP1	0.052
YBR246W	YBR246W	YJL007C	YJL007C	0.052
YBR246W	YBR246W	YKL217W	JEN1	0.052
YBR246W	YBR246W	YLL020C	YLL020C	0.052
YBR246W	YBR246W	YLR038C	COX12	0.052
YBR246W	YBR246W	YLR164W	YLR164W	0.052
YBR246W	YBR246W	YLR255C	YLR255C	0.052
YBR246W	YBR246W	YLR398C	SKI2	0.052
YBR246W	YBR246W	YMR282C	AEP2	0.052
YBR246W	YBR246W	YNL040W	YNL040W	0.052
YBR246W	YBR246W	YOL030W	GAS5	0.052
YBR246W	YBR246W	YOL091W	SPO21	0.052
YBR246W	YBR246W	YOL151W	GRE2	0.052
YBR246W	YBR246W	YOR125C	CAT5	0.052
YBR246W	YBR246W	YOR178C	GAC1	0.052
YBR246W	YBR246W	YPL236C	ENV7	0.052
YBR246W	YBR246W	YPL264C	YPL264C	0.052
YBR246W	YBR246W	YPR028W	YOP1	0.052
YBR246W	YBR246W	YPR050C	YPR050C	0.052
YBR246W	YBR246W	YAL017W	PSK1	0.051
YBR246W	YBR246W	YBL017C	PEP1	0.051
YBR246W	YBR246W	YBR034C	HMT1	0.051
YBR246W	YBR246W	YBR205W	KTR3	0.051
YBR246W	YBR246W	YBR283C	SSH1	0.051
YBR246W	YBR246W	YDL112W	TRM3	0.051
YBR246W	YBR246W	YDR150W	NUM1	0.051
YBR246W	YBR246W	YDR156W	RPA14	0.051
YBR246W	YBR246W	YDR424C	DYN2	0.051
YBR246W	YBR246W	YER090W	TRP2	0.051
YBR246W	YBR246W	YFL010W-A	AUA1	0.051
YBR246W	YBR246W	YGL034C	YGL034C	0.051
YBR246W	YBR246W	YGL053W	PRM8	0.051
YBR246W	YBR246W	YGR129W	SYF2	0.051
YBR246W	YBR246W	YGR166W	KRE11	0.051
YBR246W	YBR246W	YHR146W	CRP1	0.051
YBR246W	YBR246W	YIL041W	GVP36	0.051
YBR246W	YBR246W	YJR082C	EAF6	0.051
YBR246W	YBR246W	YLR279W	YLR279W	0.051
YBR246W	YBR246W	YLR401C	DUS3	0.051
YBR246W	YBR246W	YMR299C	DYN3	0.051
YBR246W	YBR246W	YNR051C	BRE5	0.051
YBR246W	YBR246W	YOL031C	SIL1	0.051
YBR246W	YBR246W	YOR002W	ALG6	0.051
YBR246W	YBR246W	YOR339C	UBC11	0.051
YBR246W	YBR246W	YAL040C	CLN3	0.05
YBR246W	YBR246W	YBL061C	SKT5	0.05
YBR246W	YBR246W	YBL096C	YBL096C	0.05
YBR246W	YBR246W	YCR007C	YCR007C	0.05
YBR246W	YBR246W	YCR036W	RBK1	0.05
YBR246W	YBR246W	YDL154W	MSH5	0.05
YBR246W	YBR246W	YDR073W	SNF11	0.05
YBR246W	YBR246W	YDR108W	GSG1	0.05
YBR246W	YBR246W	YDR117C	TMA64	0.05
YBR246W	YBR246W	YDR147W	EKI1	0.05
YBR246W	YBR246W	YER046W	SPO73	0.05
YBR246W	YBR246W	YFR006W	YFR006W	0.05
YBR246W	YBR246W	YGL158W	RCK1	0.05
YBR246W	YBR246W	YGR111W	YGR111W	0.05
YBR246W	YBR246W	YHL023C	RMD11	0.05
YBR246W	YBR246W	YHL046C	PAU13	0.05
YBR246W	YBR246W	YHR050W	SMF2	0.05
YBR246W	YBR246W	YJR146W	YJR146W	0.05
YBR246W	YBR246W	YKR051W	YKR051W	0.05
YBR246W	YBR246W	YLR218C	YLR218C	0.05
YBR246W	YBR246W	YLR246W	ERF2	0.05
YBR246W	YBR246W	YLR429W	CRN1	0.05
YBR246W	YBR246W	YML019W	OST6	0.05
YBR246W	YBR246W	YMR065W	KAR5	0.05
YBR246W	YBR246W	YNR019W	ARE2	0.05
YBR246W	YBR246W	YOL106W	YOL106W	0.05
YBR246W	YBR246W	YOL137W	BSC6	0.05
YBR246W	YBR246W	YOR088W	YOR088W	0.05
YBR246W	YBR246W	YOR343C	YOR343C	0.05
YBR246W	YBR246W	YAL058W	CNE1	0.049
YBR246W	YBR246W	YCL038C	ATG22	0.049
YBR246W	YBR246W	YDR312W	SSF2	0.049
YBR246W	YBR246W	YGL080W	FMP37	0.049
YBR246W	YBR246W	YGR287C	YGR287C	0.049
YBR246W	YBR246W	YIL146C	ECM37	0.049
YBR246W	YBR246W	YJL045W	YJL045W	0.049
YBR246W	YBR246W	YJL123C	MTC1	0.049
YBR246W	YBR246W	YJR011C	YJR011C	0.049
YBR246W	YBR246W	YJR140C	HIR3	0.049
YBR246W	YBR246W	YKL098W	MTC2	0.049
YBR246W	YBR246W	YLR047C	FRE8	0.049
YBR246W	YBR246W	YLR460C	YLR460C	0.049
YBR246W	YBR246W	YOL119C	MCH4	0.049
YBR246W	YBR246W	YOL152W	FRE7	0.049
YBR246W	YBR246W	YOR183W	FYV12	0.049
YBR246W	YBR246W	YPL244C	HUT1	0.049
YBR246W	YBR246W	YAL027W	SAW1	0.048
YBR246W	YBR246W	YCR085W	YCR085W	0.048
YBR246W	YBR246W	YDL018C	ERP3	0.048
YBR246W	YBR246W	YDL171C	GLT1	0.048
YBR246W	YBR246W	YHR116W	COX23	0.048
YBR246W	YBR246W	YHR139C-A	YHR139C-A	0.048
YBR246W	YBR246W	YIL151C	ESL1	0.048
YBR246W	YBR246W	YJL047C	RTT101	0.048
YBR246W	YBR246W	YJR069C	HAM1	0.048
YBR246W	YBR246W	YLR123C	YLR123C	0.048
YBR246W	YBR246W	YLR170C	APS1	0.048
YBR246W	YBR246W	YLR261C	VPS63	0.048
YBR246W	YBR246W	YLR308W	CDA2	0.048
YBR246W	YBR246W	YMR006C	PLB2	0.048
YBR246W	YBR246W	YMR172C-A	YMR172C-A	0.048
YBR246W	YBR246W	YMR180C	CTL1	0.048
YBR246W	YBR246W	YMR224C	MRE11	0.048
YBR246W	YBR246W	YNL041C	COG6	0.048
YBR246W	YBR246W	YNL065W	AQR1	0.048
YBR246W	YBR246W	YNL071W	LAT1	0.048
YBR246W	YBR246W	YNR018W	AIM38	0.048
YBR246W	YBR246W	YOL113W	SKM1	0.048
YBR246W	YBR246W	YOR115C	TRS33	0.048
YBR246W	YBR246W	YAL015C	NTG1	0.047
YBR246W	YBR246W	YBR016W	YBR016W	0.047
YBR246W	YBR246W	YCR076C	YCR076C	0.047
YBR246W	YBR246W	YDL110C	TMA17	0.047
YBR246W	YBR246W	YDR095C	YDR095C	0.047
YBR246W	YBR246W	YGR110W	YGR110W	0.047
YBR246W	YBR246W	YGR223C	HSV2	0.047
YBR246W	YBR246W	YIL052C	RPL34B	0.047
YBR246W	YBR246W	YIL102C	YIL102C	0.047
YBR246W	YBR246W	YJL082W	IML2	0.047
YBR246W	YBR246W	YJR088C	EMC2	0.047
YBR246W	YBR246W	YNL116W	DMA2	0.047
YBR246W	YBR246W	YOL056W	GPM3	0.047
YBR246W	YBR246W	YOL112W	MSB4	0.047
YBR246W	YBR246W	YPL066W	YPL066W	0.047
YBR246W	YBR246W	YPR070W	MED1	0.047
YBR246W	YBR246W	YAL029C	MYO4	0.046
YBR246W	YBR246W	YCR031C	RPS14A	0.046
YBR246W	YBR246W	YDL002C	NHP10	0.046
YBR246W	YBR246W	YDL006W	PTC1	0.046
YBR246W	YBR246W	YDR015C	YDR015C	0.046
YBR246W	YBR246W	YDR287W	INM2	0.046
YBR246W	YBR246W	YDR360W	OPI7	0.046
YBR246W	YBR246W	YER128W	YER128W	0.046
YBR246W	YBR246W	YFL028C	CAF16	0.046
YBR246W	YBR246W	YFR035C	YFR035C	0.046
YBR246W	YBR246W	YGR052W	FMP48	0.046
YBR246W	YBR246W	YKL051W	SFK1	0.046
YBR246W	YBR246W	YKL156W	RPS27A	0.046
YBR246W	YBR246W	YLR065C	YLR065C	0.046
YBR246W	YBR246W	YLR122C	YLR122C	0.046
YBR246W	YBR246W	YLR227C	ADY4	0.046
YBR246W	YBR246W	YLR319C	BUD6	0.046
YBR246W	YBR246W	YML018C	YML018C	0.046
YBR246W	YBR246W	YML074C	FPR3	0.046
YBR246W	YBR246W	YNL056W	OCA2	0.046
YBR246W	YBR246W	YNL140C	YNL140C	0.046
YBR246W	YBR246W	YOR324C	FRT1	0.046
YBR246W	YBR246W	YOR384W	FRE5	0.046
YBR246W	YBR246W	YPL017C	IRC15	0.046
YBR246W	YBR246W	YPL027W	SMA1	0.046
YBR246W	YBR246W	YPL090C	RPS6A	0.046
YBR246W	YBR246W	YPL258C	THI21	0.046
YBR246W	YBR246W	YDL219W	DTD1	0.045
YBR246W	YBR246W	YDR133C	YDR133C	0.045
YBR246W	YBR246W	YFL007W	BLM10	0.045
YBR246W	YBR246W	YFR040W	SAP155	0.045
YBR246W	YBR246W	YGL146C	YGL146C	0.045
YBR246W	YBR246W	YGL174W	BUD13	0.045
YBR246W	YBR246W	YGL228W	SHE10	0.045
YBR246W	YBR246W	YGR079W	YGR079W	0.045
YBR246W	YBR246W	YHL042W	YHL042W	0.045
YBR246W	YBR246W	YKL072W	STB6	0.045
YBR246W	YBR246W	YKL094W	YJU3	0.045
YBR246W	YBR246W	YLL058W	YLL058W	0.045
YBR246W	YBR246W	YLR034C	SMF3	0.045
YBR246W	YBR246W	YLR149C	YLR149C	0.045
YBR246W	YBR246W	YLR390W-A	CCW14	0.045
YBR246W	YBR246W	YLR449W	FPR4	0.045
YBR246W	YBR246W	YMR189W	GCV2	0.045
YBR246W	YBR246W	YOL020W	TAT2	0.045
YBR246W	YBR246W	YOL088C	MPD2	0.045
YBR246W	YBR246W	YOR031W	CRS5	0.045
YBR246W	YBR246W	YPL245W	YPL245W	0.045
YBR246W	YBR246W	YAL004W	YAL004W	0.044
YBR246W	YBR246W	YBR149W	ARA1	0.044
YBR246W	YBR246W	YDR005C	MAF1	0.044
YBR246W	YBR246W	YDR026C	YDR026C	0.044
YBR246W	YBR246W	YGL165C	YGL165C	0.044
YBR246W	YBR246W	YGL216W	KIP3	0.044
YBR246W	YBR246W	YGR275W	RTT102	0.044
YBR246W	YBR246W	YHR150W	PEX28	0.044
YBR246W	YBR246W	YIL008W	URM1	0.044
YBR246W	YBR246W	YJL066C	MPM1	0.044
YBR246W	YBR246W	YJL208C	NUC1	0.044
YBR246W	YBR246W	YJR115W	YJR115W	0.044
YBR246W	YBR246W	YML100W	TSL1	0.044
YBR246W	YBR246W	YPR077C	YPR077C	0.044
YBR246W	YBR246W	YBR203W	COS111	0.043
YBR246W	YBR246W	YBR230C	OM14	0.043
YBR246W	YBR246W	YCR053W	THR4	0.043
YBR246W	YBR246W	YDL051W	LHP1	0.043
YBR246W	YBR246W	YER066W	YER066W	0.043
YBR246W	YBR246W	YGL005C	COG7	0.043
YBR246W	YBR246W	YHR126C	ANS1	0.043
YBR246W	YBR246W	YIL058W	YIL058W	0.043
YBR246W	YBR246W	YJL053W	PEP8	0.043
YBR246W	YBR246W	YJL139C	YUR1	0.043
YBR246W	YBR246W	YJR091C	JSN1	0.043
YBR246W	YBR246W	YLL047W	YLL047W	0.043
YBR246W	YBR246W	YLR353W	BUD8	0.043
YBR246W	YBR246W	YMR198W	CIK1	0.043
YBR246W	YBR246W	YNL052W	COX5A	0.043
YBR246W	YBR246W	YNR069C	BSC5	0.043
YBR246W	YBR246W	YOR017W	PET127	0.043
YBR246W	YBR246W	YOR267C	HRK1	0.043
YBR246W	YBR246W	YOR350C	MNE1	0.043
YBR246W	YBR246W	YPL018W	CTF19	0.043
YBR246W	YBR246W	YAR027W	UIP3	0.042
YBR246W	YBR246W	YBR024W	SCO2	0.042
YBR246W	YBR246W	YBR076W	ECM8	0.042
YBR246W	YBR246W	YDL177C	YDL177C	0.042
YBR246W	YBR246W	YDL200C	MGT1	0.042
YBR246W	YBR246W	YDR284C	DPP1	0.042
YBR246W	YBR246W	YDR490C	PKH1	0.042
YBR246W	YBR246W	YGL043W	DST1	0.042
YBR246W	YBR246W	YGL144C	ROG1	0.042
YBR246W	YBR246W	YGR117C	YGR117C	0.042
YBR246W	YBR246W	YHR114W	BZZ1	0.042
YBR246W	YBR246W	YHR137W	ARO9	0.042
YBR246W	YBR246W	YHR151C	MTC6	0.042
YBR246W	YBR246W	YIR013C	GAT4	0.042
YBR246W	YBR246W	YKL067W	YNK1	0.042
YBR246W	YBR246W	YKL137W	CMC1	0.042
YBR246W	YBR246W	YML038C	YMD8	0.042
YBR246W	YBR246W	YMR030W	RSF1	0.042
YBR246W	YBR246W	YNR004W	YNR004W	0.042
YBR246W	YBR246W	YOL093W	TRM10	0.042
YBR246W	YBR246W	YOR007C	SGT2	0.042
YBR246W	YBR246W	YOR120W	GCY1	0.042
YBR246W	YBR246W	YOR129C	AFI1	0.042
YBR246W	YBR246W	YPL054W	LEE1	0.042
YBR246W	YBR246W	YAL030W	SNC1	0.041
YBR246W	YBR246W	YBL065W	YBL065W	0.041
YBR246W	YBR246W	YBL066C	SEF1	0.041
YBR246W	YBR246W	YDR097C	MSH6	0.041
YBR246W	YBR246W	YDR119W	VBA4	0.041
YBR246W	YBR246W	YDR223W	CRF1	0.041
YBR246W	YBR246W	YDR509W	YDR509W	0.041
YBR246W	YBR246W	YER142C	MAG1	0.041
YBR246W	YBR246W	YGL151W	NUT1	0.041
YBR246W	YBR246W	YHR129C	ARP1	0.041
YBR246W	YBR246W	YIL113W	SDP1	0.041
YBR246W	YBR246W	YJL044C	GYP6	0.041
YBR246W	YBR246W	YKL151C	YKL151C	0.041
YBR246W	YBR246W	YLR079W	SIC1	0.041
YBR246W	YBR246W	YLR407W	YLR407W	0.041
YBR246W	YBR246W	YML066C	SMA2	0.041
YBR246W	YBR246W	YNL023C	FAP1	0.041
YBR246W	YBR246W	YNR044W	AGA1	0.041
YBR246W	YBR246W	YNR058W	BIO3	0.041
YBR246W	YBR246W	YOL037C	YOL037C	0.041
YBR246W	YBR246W	YOR315W	SFG1	0.041
YBR246W	YBR246W	YPL064C	CWC27	0.041
YBR246W	YBR246W	YPL070W	MUK1	0.041
YBR246W	YBR246W	YPL101W	ELP4	0.041
YBR246W	YBR246W	YBL063W	KIP1	0.04
YBR246W	YBR246W	YBL102W	SFT2	0.04
YBR246W	YBR246W	YBR181C	RPS6B	0.04
YBR246W	YBR246W	YDL094C	YDL094C	0.04
YBR246W	YBR246W	YDR049W	YDR049W	0.04
YBR246W	YBR246W	YDR116C	MRPL1	0.04
YBR246W	YBR246W	YDR488C	PAC11	0.04
YBR246W	YBR246W	YER108C	YER108C	0.04
YBR246W	YBR246W	YER134C	YER134C	0.04
YBR246W	YBR246W	YGL057C	YGL057C	0.04
YBR246W	YBR246W	YGR042W	YGR042W	0.04
YBR246W	YBR246W	YHL009C	YAP3	0.04
YBR246W	YBR246W	YIL015W	BAR1	0.04
YBR246W	YBR246W	YIL030C	SSM4	0.04
YBR246W	YBR246W	YIL124W	AYR1	0.04
YBR246W	YBR246W	YLL049W	LDB18	0.04
YBR246W	YBR246W	YLR081W	GAL2	0.04
YBR246W	YBR246W	YMR237W	BCH1	0.04
YBR246W	YBR246W	YMR279C	YMR279C	0.04
YBR246W	YBR246W	YNR032W	PPG1	0.04
YBR246W	YBR246W	YNR040W	YNR040W	0.04
YBR246W	YBR246W	YOL003C	PFA4	0.04
YBR246W	YBR246W	YOL068C	HST1	0.04
YBR246W	YBR246W	YOR083W	WHI5	0.04
YBR246W	YBR246W	YOR108W	LEU9	0.04
YBR246W	YBR246W	YPL144W	POC4	0.04
YBR246W	YBR246W	YBR238C	YBR238C	0.039
YBR246W	YBR246W	YDL096C	OPI6	0.039
YBR246W	YBR246W	YDR482C	CWC21	0.039
YBR246W	YBR246W	YER048C	CAJ1	0.039
YBR246W	YBR246W	YER158C	YER158C	0.039
YBR246W	YBR246W	YFR056C	YFR056C	0.039
YBR246W	YBR246W	YIL166C	YIL166C	0.039
YBR246W	YBR246W	YJL135W	YJL135W	0.039
YBR246W	YBR246W	YKL113C	RAD27	0.039
YBR246W	YBR246W	YKL185W	ASH1	0.039
YBR246W	YBR246W	YKL199C	YKL199C	0.039
YBR246W	YBR246W	YLR180W	SAM1	0.039
YBR246W	YBR246W	YMR037C	MSN2	0.039
YBR246W	YBR246W	YMR063W	RIM9	0.039
YBR246W	YBR246W	YMR078C	CTF18	0.039
YBR246W	YBR246W	YOR121C	YOR121C	0.039
YBR246W	YBR246W	YOR134W	BAG7	0.039
YBR246W	YBR246W	YPL023C	MET12	0.039
YBR246W	YBR246W	YPR018W	RLF2	0.039
YBR246W	YBR246W	YPR155C	NCA2	0.039
YBR246W	YBR246W	YAL020C	ATS1	0.038
YBR246W	YBR246W	YBL106C	SRO77	0.038
YBR246W	YBR246W	YBR025C	OLA1	0.038
YBR246W	YBR246W	YDL199C	YDL199C	0.038
YBR246W	YBR246W	YDR492W	IZH1	0.038
YBR246W	YBR246W	YFR009W	GCN20	0.038
YBR246W	YBR246W	YGL071W	AFT1	0.038
YBR246W	YBR246W	YGL176C	YGL176C	0.038
YBR246W	YBR246W	YGL229C	SAP4	0.038
YBR246W	YBR246W	YGR080W	TWF1	0.038
YBR246W	YBR246W	YGR181W	TIM13	0.038
YBR246W	YBR246W	YGR238C	KEL2	0.038
YBR246W	YBR246W	YHR073W	OSH3	0.038
YBR246W	YBR246W	YJR059W	PTK2	0.038
YBR246W	YBR246W	YKL044W	YKL044W	0.038
YBR246W	YBR246W	YKR054C	DYN1	0.038
YBR246W	YBR246W	YLL028W	TPO1	0.038
YBR246W	YBR246W	YLR056W	ERG3	0.038
YBR246W	YBR246W	YML063W	RPS1B	0.038
YBR246W	YBR246W	YMR183C	SSO2	0.038
YBR246W	YBR246W	YOR138C	RUP1	0.038
YBR246W	YBR246W	YPL033C	SRL4	0.038
YBR246W	YBR246W	YBR027C	YBR027C	0.037
YBR246W	YBR246W	YBR128C	ATG14	0.037
YBR246W	YBR246W	YBR158W	AMN1	0.037
YBR246W	YBR246W	YBR281C	DUG2	0.037
YBR246W	YBR246W	YCL042W	YCL042W	0.037
YBR246W	YBR246W	YCL057W	PRD1	0.037
YBR246W	YBR246W	YDL184C	RPL41A	0.037
YBR246W	YBR246W	YDR004W	RAD57	0.037
YBR246W	YBR246W	YDR072C	IPT1	0.037
YBR246W	YBR246W	YDR384C	ATO3	0.037
YBR246W	YBR246W	YGL046W	YGL046W	0.037
YBR246W	YBR246W	YGL079W	YGL079W	0.037
YBR246W	YBR246W	YIL050W	PCL7	0.037
YBR246W	YBR246W	YJL134W	LCB3	0.037
YBR246W	YBR246W	YJR039W	YJR039W	0.037
YBR246W	YBR246W	YLL005C	SPO75	0.037
YBR246W	YBR246W	YMR306C-A	YMR306C-A	0.037
YBR246W	YBR246W	YOR024W	YOR024W	0.037
YBR246W	YBR246W	YOR225W	YOR225W	0.037
YBR246W	YBR246W	YPL008W	CHL1	0.037
YBR246W	YBR246W	YPL055C	LGE1	0.037
YBR246W	YBR246W	YBR145W	ADH5	0.036
YBR246W	YBR246W	YCR026C	NPP1	0.036
YBR246W	YBR246W	YDR051C	DET1	0.036
YBR246W	YBR246W	YDR110W	FOB1	0.036
YBR246W	YBR246W	YDR162C	NBP2	0.036
YBR246W	YBR246W	YDR210W	YDR210W	0.036
YBR246W	YBR246W	YFR011C	AIM13	0.036
YBR246W	YBR246W	YGR213C	RTA1	0.036
YBR246W	YBR246W	YIL025C	YIL025C	0.036
YBR246W	YBR246W	YJR015W	YJR015W	0.036
YBR246W	YBR246W	YKR030W	GMH1	0.036
YBR246W	YBR246W	YKR047W	YKR047W	0.036
YBR246W	YBR246W	YLR092W	SUL2	0.036
YBR246W	YBR246W	YLR207W	HRD3	0.036
YBR246W	YBR246W	YLR250W	SSP120	0.036
YBR246W	YBR246W	YML096W	YML096W	0.036
YBR246W	YBR246W	YMR176W	ECM5	0.036
YBR246W	YBR246W	YNL032W	SIW14	0.036
YBR246W	YBR246W	YNL049C	SFB2	0.036
YBR246W	YBR246W	YNL129W	NRK1	0.036
YBR246W	YBR246W	YOR027W	STI1	0.036
YBR246W	YBR246W	YOR264W	DSE3	0.036
YBR246W	YBR246W	YOR356W	YOR356W	0.036
YBR246W	YBR246W	YPR003C	YPR003C	0.036
YBR246W	YBR246W	YBR207W	FTH1	0.035
YBR246W	YBR246W	YBR226C	YBR226C	0.035
YBR246W	YBR246W	YCL006C	YCL006C	0.035
YBR246W	YBR246W	YCR032W	BPH1	0.035
YBR246W	YBR246W	YDR036C	EHD3	0.035
YBR246W	YBR246W	YDR059C	UBC5	0.035
YBR246W	YBR246W	YDR446W	ECM11	0.035
YBR246W	YBR246W	YER176W	ECM32	0.035
YBR246W	YBR246W	YFL014W	HSP12	0.035
YBR246W	YBR246W	YGL180W	ATG1	0.035
YBR246W	YBR246W	YGR096W	TPC1	0.035
YBR246W	YBR246W	YGR182C	YGR182C	0.035
YBR246W	YBR246W	YGR226C	YGR226C	0.035
YBR246W	YBR246W	YGR237C	YGR237C	0.035
YBR246W	YBR246W	YHR199C	AIM46	0.035
YBR246W	YBR246W	YIL162W	SUC2	0.035
YBR246W	YBR246W	YKR028W	SAP190	0.035
YBR246W	YBR246W	YLL048C	YBT1	0.035
YBR246W	YBR246W	YLR181C	VTA1	0.035
YBR246W	YBR246W	YLR287C	YLR287C	0.035
YBR246W	YBR246W	YML003W	YML003W	0.035
YBR246W	YBR246W	YMR036C	MIH1	0.035
YBR246W	YBR246W	YMR158C-A	YMR158C-A	0.035
YBR246W	YBR246W	YMR216C	SKY1	0.035
YBR246W	YBR246W	YMR292W	GOT1	0.035
YBR246W	YBR246W	YNL034W	YNL034W	0.035
YBR246W	YBR246W	YNL085W	MKT1	0.035
YBR246W	YBR246W	YNR013C	PHO91	0.035
YBR246W	YBR246W	YOL002C	IZH2	0.035
YBR246W	YBR246W	YOL075C	YOL075C	0.035
YBR246W	YBR246W	YPL147W	PXA1	0.035
YBR246W	YBR246W	YPR004C	AIM45	0.035
YBR246W	YBR246W	YPR012W	YPR012W	0.035
YBR246W	YBR246W	YPR167C	MET16	0.035
YBR246W	YBR246W	YDR074W	TPS2	0.034
YBR246W	YBR246W	YDR163W	CWC15	0.034
YBR246W	YBR246W	YHR181W	SVP26	0.034
YBR246W	YBR246W	YJL150W	YJL150W	0.034
YBR246W	YBR246W	YJR124C	YJR124C	0.034
YBR246W	YBR246W	YKL114C	APN1	0.034
YBR246W	YBR246W	YLR042C	YLR042C	0.034
YBR246W	YBR246W	YLR128W	DCN1	0.034
YBR246W	YBR246W	YLR451W	LEU3	0.034
YBR246W	YBR246W	YMR017W	SPO20	0.034
YBR246W	YBR246W	YMR173W	DDR48	0.034
YBR246W	YBR246W	YNL030W	HHF2	0.034
YBR246W	YBR246W	YNR010W	CSE2	0.034
YBR246W	YBR246W	YOL118C	YOL118C	0.034
YBR246W	YBR246W	YOR135C	IRC14	0.034
YBR246W	YBR246W	YOR152C	YOR152C	0.034
YBR246W	YBR246W	YOR156C	NFI1	0.034
YBR246W	YBR246W	YOR237W	HES1	0.034
YBR246W	YBR246W	YOR354C	MSC6	0.034
YBR246W	YBR246W	YPL174C	NIP100	0.034
YBR246W	YBR246W	YAL051W	OAF1	0.033
YBR246W	YBR246W	YAR023C	YAR023C	0.033
YBR246W	YBR246W	YBL052C	SAS3	0.033
YBR246W	YBR246W	YBR074W	YBR074W	0.033
YBR246W	YBR246W	YBR259W	YBR259W	0.033
YBR246W	YBR246W	YCL001W	RER1	0.033
YBR246W	YBR246W	YDL180W	YDL180W	0.033
YBR246W	YBR246W	YDL187C	YDL187C	0.033
YBR246W	YBR246W	YDL243C	AAD4	0.033
YBR246W	YBR246W	YDR030C	RAD28	0.033
YBR246W	YBR246W	YDR253C	MET32	0.033
YBR246W	YBR246W	YDR533C	HSP31	0.033
YBR246W	YBR246W	YGR205W	YGR205W	0.033
YBR246W	YBR246W	YHR087W	RTC3	0.033
YBR246W	YBR246W	YHR178W	STB5	0.033
YBR246W	YBR246W	YIL135C	VHS2	0.033
YBR246W	YBR246W	YJR060W	CBF1	0.033
YBR246W	YBR246W	YJR075W	HOC1	0.033
YBR246W	YBR246W	YLL046C	RNP1	0.033
YBR246W	YBR246W	YLR014C	PPR1	0.033
YBR246W	YBR246W	YLR048W	RPS0B	0.033
YBR246W	YBR246W	YLR183C	TOS4	0.033
YBR246W	YBR246W	YLR211C	YLR211C	0.033
YBR246W	YBR246W	YMR020W	FMS1	0.033
YBR246W	YBR246W	YNL050C	YNL050C	0.033
YBR246W	YBR246W	YNL089C	YNL089C	0.033
YBR246W	YBR246W	YOR313C	SPS4	0.033
YBR246W	YBR246W	YPL261C	YPL261C	0.033
YBR246W	YBR246W	YPR032W	SRO7	0.033
YBR246W	YBR246W	YBL010C	YBL010C	0.032
YBR246W	YBR246W	YBL051C	PIN4	0.032
YBR246W	YBR246W	YBR078W	ECM33	0.032
YBR246W	YBR246W	YBR285W	YBR285W	0.032
YBR246W	YBR246W	YCR014C	POL4	0.032
YBR246W	YBR246W	YDL065C	PEX19	0.032
YBR246W	YBR246W	YDL100C	GET3	0.032
YBR246W	YBR246W	YDL239C	ADY3	0.032
YBR246W	YBR246W	YDR181C	SAS4	0.032
YBR246W	YBR246W	YDR273W	DON1	0.032
YBR246W	YBR246W	YDR431W	YDR431W	0.032
YBR246W	YBR246W	YER151C	UBP3	0.032
YBR246W	YBR246W	YGL084C	GUP1	0.032
YBR246W	YBR246W	YGR227W	DIE2	0.032
YBR246W	YBR246W	YHL034C	SBP1	0.032
YBR246W	YBR246W	YHR077C	NMD2	0.032
YBR246W	YBR246W	YIL007C	NAS2	0.032
YBR246W	YBR246W	YJL172W	CPS1	0.032
YBR246W	YBR246W	YKL102C	YKL102C	0.032
YBR246W	YBR246W	YLR058C	SHM2	0.032
YBR246W	YBR246W	YLR135W	SLX4	0.032
YBR246W	YBR246W	YLR138W	NHA1	0.032
YBR246W	YBR246W	YMR003W	AIM34	0.032
YBR246W	YBR246W	YMR052W	FAR3	0.032
YBR246W	YBR246W	YMR173W-A	YMR173W-A	0.032
YBR246W	YBR246W	YMR222C	FSH2	0.032
YBR246W	YBR246W	YOL085C	YOL085C	0.032
YBR246W	YBR246W	YOR166C	SWT1	0.032
YBR246W	YBR246W	YPL072W	UBP16	0.032
YBR246W	YBR246W	YPL267W	ACM1	0.032
YBR246W	YBR246W	YPR011C	YPR011C	0.032
YBR246W	YBR246W	YBR263W	SHM1	0.031
YBR246W	YBR246W	YBR295W	PCA1	0.031
YBR246W	YBR246W	YCL075W	YCL075W	0.031
YBR246W	YBR246W	YCR033W	SNT1	0.031
YBR246W	YBR246W	YDR056C	YDR056C	0.031
YBR246W	YBR246W	YDR271C	YDR271C	0.031
YBR246W	YBR246W	YDR294C	DPL1	0.031
YBR246W	YBR246W	YDR318W	MCM21	0.031
YBR246W	YBR246W	YGR028W	MSP1	0.031
YBR246W	YBR246W	YGR131W	YGR131W	0.031
YBR246W	YBR246W	YJL199C	MBB1	0.031
YBR246W	YBR246W	YJR078W	BNA2	0.031
YBR246W	YBR246W	YKR059W	TIF1	0.031
YBR246W	YBR246W	YLL041C	SDH2	0.031
YBR246W	YBR246W	YLR126C	YLR126C	0.031
YBR246W	YBR246W	YLR178C	TFS1	0.031
YBR246W	YBR246W	YLR251W	SYM1	0.031
YBR246W	YBR246W	YLR262C	YPT6	0.031
YBR246W	YBR246W	YML102W	CAC2	0.031
YBR246W	YBR246W	YNL003C	PET8	0.031
YBR246W	YBR246W	YNL047C	SLM2	0.031
YBR246W	YBR246W	YNR060W	FRE4	0.031
YBR246W	YBR246W	YOR271C	FSF1	0.031
YBR246W	YBR246W	YPL053C	KTR6	0.031
YBR246W	YBR246W	YPL185W	YPL185W	0.031
YBR246W	YBR246W	YPL207W	TYW1	0.031
YBR246W	YBR246W	YAL019W	FUN30	0.03
YBR246W	YBR246W	YBR114W	RAD16	0.03
YBR246W	YBR246W	YBR214W	SDS24	0.03
YBR246W	YBR246W	YDR055W	PST1	0.03
YBR246W	YBR246W	YDR126W	SWF1	0.03
YBR246W	YBR246W	YDR130C	FIN1	0.03
YBR246W	YBR246W	YDR262W	YDR262W	0.03
YBR246W	YBR246W	YDR444W	YDR444W	0.03
YBR246W	YBR246W	YFL053W	DAK2	0.03
YBR246W	YBR246W	YGR239C	PEX21	0.03
YBR246W	YBR246W	YIL132C	CSM2	0.03
YBR246W	YBR246W	YKR016W	AIM28	0.03
YBR246W	YBR246W	YLR174W	IDP2	0.03
YBR246W	YBR246W	YLR237W	THI7	0.03
YBR246W	YBR246W	YMR137C	PSO2	0.03
YBR246W	YBR246W	YMR219W	ESC1	0.03
YBR246W	YBR246W	YMR272C	SCS7	0.03
YBR246W	YBR246W	YPR046W	MCM16	0.03
YBR246W	YBR246W	YBR009C	HHF1	0.029
YBR246W	YBR246W	YBR231C	SWC5	0.029
YBR246W	YBR246W	YDL157C	YDL157C	0.029
YBR246W	YBR246W	YDR214W	AHA1	0.029
YBR246W	YBR246W	YDR508C	GNP1	0.029
YBR246W	YBR246W	YGL195W	GCN1	0.029
YBR246W	YBR246W	YGR027C	RPS25A	0.029
YBR246W	YBR246W	YJL004C	SYS1	0.029
YBR246W	YBR246W	YKR029C	SET3	0.029
YBR246W	YBR246W	YLR428C	YLR428C	0.029
YBR246W	YBR246W	YMR053C	STB2	0.029
YBR246W	YBR246W	YMR192W	GYL1	0.029
YBR246W	YBR246W	YMR271C	URA10	0.029
YBR246W	YBR246W	YNR073C	YNR073C	0.029
YBR246W	YBR246W	YOL081W	IRA2	0.029
YBR246W	YBR246W	YOR035C	SHE4	0.029
YBR246W	YBR246W	YPL039W	YPL039W	0.029
YBR246W	YBR246W	YPL102C	YPL102C	0.029
YBR246W	YBR246W	YCL002C	YCL002C	0.028
YBR246W	YBR246W	YDL142C	CRD1	0.028
YBR246W	YBR246W	YDR279W	RNH202	0.028
YBR246W	YBR246W	YDR291W	HRQ1	0.028
YBR246W	YBR246W	YER093C-A	AIM11	0.028
YBR246W	YBR246W	YER123W	YCK3	0.028
YBR246W	YBR246W	YGR143W	SKN1	0.028
YBR246W	YBR246W	YHL019C	APM2	0.028
YBR246W	YBR246W	YHR012W	VPS29	0.028
YBR246W	YBR246W	YHR117W	TOM71	0.028
YBR246W	YBR246W	YIR018W	YAP5	0.028
YBR246W	YBR246W	YIR039C	YPS6	0.028
YBR246W	YBR246W	YJL057C	IKS1	0.028
YBR246W	YBR246W	YJL214W	HXT8	0.028
YBR246W	YBR246W	YJR135C	MCM22	0.028
YBR246W	YBR246W	YKL132C	RMA1	0.028
YBR246W	YBR246W	YLR184W	YLR184W	0.028
YBR246W	YBR246W	YLR289W	GUF1	0.028
YBR246W	YBR246W	YML124C	TUB3	0.028
YBR246W	YBR246W	YMR068W	AVO2	0.028
YBR246W	YBR246W	YMR143W	RPS16A	0.028
YBR246W	YBR246W	YMR186W	HSC82	0.028
YBR246W	YBR246W	YNL027W	CRZ1	0.028
YBR246W	YBR246W	YNR032C-A	HUB1	0.028
YBR246W	YBR246W	YOR026W	BUB3	0.028
YBR246W	YBR246W	YOR084W	LPX1	0.028
YBR246W	YBR246W	YOR111W	YOR111W	0.028
YBR246W	YBR246W	YOR170W	YOR170W	0.028
YBR246W	YBR246W	YPL181W	CTI6	0.028
YBR246W	YBR246W	YPR095C	SYT1	0.028
YBR246W	YBR246W	YAR029W	YAR029W	0.027
YBR246W	YBR246W	YBL086C	YBL086C	0.027
YBR246W	YBR246W	YBL091C-A	SCS22	0.027
YBR246W	YBR246W	YCR095C	OCA4	0.027
YBR246W	YBR246W	YDR084C	TVP23	0.027
YBR246W	YBR246W	YER061C	CEM1	0.027
YBR246W	YBR246W	YFL013W-A	YFL013W-A	0.027
YBR246W	YBR246W	YFL025C	BST1	0.027
YBR246W	YBR246W	YGR130C	YGR130C	0.027
YBR246W	YBR246W	YGR224W	AZR1	0.027
YBR246W	YBR246W	YHR021C	RPS27B	0.027
YBR246W	YBR246W	YIL067C	YIL067C	0.027
YBR246W	YBR246W	YJL051W	IRC8	0.027
YBR246W	YBR246W	YLR098C	CHA4	0.027
YBR246W	YBR246W	YML011C	RAD33	0.027
YBR246W	YBR246W	YML033W	YML033W	0.027
YBR246W	YBR246W	YML095C	RAD10	0.027
YBR246W	YBR246W	YMR056C	AAC1	0.027
YBR246W	YBR246W	YOL155C	HPF1	0.027
YBR246W	YBR246W	YOR186W	YOR186W	0.027
YBR246W	YBR246W	YPL060W	LPE10	0.027
YBR246W	YBR246W	YAL049C	AIM2	0.026
YBR246W	YBR246W	YBL008W	HIR1	0.026
YBR246W	YBR246W	YBR062C	YBR062C	0.026
YBR246W	YBR246W	YBR185C	MBA1	0.026
YBR246W	YBR246W	YCL013W	YCL013W	0.026
YBR246W	YBR246W	YDR202C	RAV2	0.026
YBR246W	YBR246W	YDR317W	HIM1	0.026
YBR246W	YBR246W	YER047C	SAP1	0.026
YBR246W	YBR246W	YER049W	TPA1	0.026
YBR246W	YBR246W	YGR015C	YGR015C	0.026
YBR246W	YBR246W	YGR037C	ACB1	0.026
YBR246W	YBR246W	YGR146C	YGR146C	0.026
YBR246W	YBR246W	YGR231C	PHB2	0.026
YBR246W	YBR246W	YHR124W	NDT80	0.026
YBR246W	YBR246W	YHR163W	SOL3	0.026
YBR246W	YBR246W	YIL014W	MNT3	0.026
YBR246W	YBR246W	YIL120W	QDR1	0.026
YBR246W	YBR246W	YIL140W	AXL2	0.026
YBR246W	YBR246W	YKL109W	HAP4	0.026
YBR246W	YBR246W	YLR154C	RNH203	0.026
YBR246W	YBR246W	YML016C	PPZ1	0.026
YBR246W	YBR246W	YML067C	ERV41	0.026
YBR246W	YBR246W	YMR042W	ARG80	0.026
YBR246W	YBR246W	YMR114C	YMR114C	0.026
YBR246W	YBR246W	YMR318C	ADH6	0.026
YBR246W	YBR246W	YOL158C	ENB1	0.026
YBR246W	YBR246W	YOR153W	PDR5	0.026
YBR246W	YBR246W	YOR246C	YOR246C	0.026
YBR246W	YBR246W	YOR327C	SNC2	0.026
YBR246W	YBR246W	YPL197C	YPL197C	0.026
YBR246W	YBR246W	YPL220W	RPL1A	0.026
YBR246W	YBR246W	YPR001W	CIT3	0.026
YBR246W	YBR246W	YPR060C	ARO7	0.026
YBR246W	YBR246W	YPR079W	MRL1	0.026
YBR246W	YBR246W	YAL007C	ERP2	0.025
YBR246W	YBR246W	YBL046W	PSY4	0.025
YBR246W	YBR246W	YBR067C	TIP1	0.025
YBR246W	YBR246W	YBR168W	PEX32	0.025
YBR246W	YBR246W	YBR221C	PDB1	0.025
YBR246W	YBR246W	YBR235W	YBR235W	0.025
YBR246W	YBR246W	YBR270C	BIT2	0.025
YBR246W	YBR246W	YCL034W	LSB5	0.025
YBR246W	YBR246W	YCR043C	YCR043C	0.025
YBR246W	YBR246W	YDL025C	YDL025C	0.025
YBR246W	YBR246W	YDL054C	MCH1	0.025
YBR246W	YBR246W	YDL222C	FMP45	0.025
YBR246W	YBR246W	YDR522C	SPS2	0.025
YBR246W	YBR246W	YER092W	IES5	0.025
YBR246W	YBR246W	YGR012W	YGR012W	0.025
YBR246W	YBR246W	YGR164W	YGR164W	0.025
YBR246W	YBR246W	YGR173W	RBG2	0.025
YBR246W	YBR246W	YIR031C	DAL7	0.025
YBR246W	YBR246W	YKL159C	RCN1	0.025
YBR246W	YBR246W	YKR026C	GCN3	0.025
YBR246W	YBR246W	YLR001C	YLR001C	0.025
YBR246W	YBR246W	YLR188W	MDL1	0.025
YBR246W	YBR246W	YLR292C	SEC72	0.025
YBR246W	YBR246W	YLR360W	VPS38	0.025
YBR246W	YBR246W	YOR040W	GLO4	0.025
YBR246W	YBR246W	YPL004C	LSP1	0.025
YBR246W	YBR246W	YPL030W	TRM44	0.025
YBR246W	YBR246W	YPR054W	SMK1	0.025
YBR246W	YBR246W	YBL088C	TEL1	0.024
YBR246W	YBR246W	YBR058C	UBP14	0.024
YBR246W	YBR246W	YDR046C	BAP3	0.024
YBR246W	YBR246W	YDR338C	YDR338C	0.024
YBR246W	YBR246W	YDR501W	PLM2	0.024
YBR246W	YBR246W	YFR020W	YFR020W	0.024
YBR246W	YBR246W	YGL002W	ERP6	0.024
YBR246W	YBR246W	YGL089C	MF(ALPHA)2	0.024
YBR246W	YBR246W	YGR021W	YGR021W	0.024
YBR246W	YBR246W	YHL002W	HSE1	0.024
YBR246W	YBR246W	YHL008C	YHL008C	0.024
YBR246W	YBR246W	YHL025W	SNF6	0.024
YBR246W	YBR246W	YHL027W	RIM101	0.024
YBR246W	YBR246W	YHR033W	YHR033W	0.024
YBR246W	YBR246W	YIL153W	RRD1	0.024
YBR246W	YBR246W	YKL007W	CAP1	0.024
YBR246W	YBR246W	YKL179C	COY1	0.024
YBR246W	YBR246W	YLR267W	BOP2	0.024
YBR246W	YBR246W	YLR300W	EXG1	0.024
YBR246W	YBR246W	YLR361C	DCR2	0.024
YBR246W	YBR246W	YML118W	NGL3	0.024
YBR246W	YBR246W	YMR048W	CSM3	0.024
YBR246W	YBR246W	YMR104C	YPK2	0.024
YBR246W	YBR246W	YMR182C	RGM1	0.024
YBR246W	YBR246W	YNL008C	ASI3	0.024
YBR246W	YBR246W	YNR020C	ATP23	0.024
YBR246W	YBR246W	YOL013C	HRD1	0.024
YBR246W	YBR246W	YOR008C-A	YOR008C-A	0.024
YBR246W	YBR246W	YOR033C	EXO1	0.024
YBR246W	YBR246W	YOR107W	RGS2	0.024
YBR246W	YBR246W	YOR293W	RPS10A	0.024
YBR246W	YBR246W	YOR342C	YOR342C	0.024
YBR246W	YBR246W	YOR379C	YOR379C	0.024
YBR246W	YBR246W	YPL022W	RAD1	0.024
YBR246W	YBR246W	YPL106C	SSE1	0.024
YBR246W	YBR246W	YBR010W	HHT1	0.023
YBR246W	YBR246W	YBR174C	YBR174C	0.023
YBR246W	YBR246W	YBR219C	YBR219C	0.023
YBR246W	YBR246W	YDL091C	UBX3	0.023
YBR246W	YBR246W	YDR419W	RAD30	0.023
YBR246W	YBR246W	YDR532C	YDR532C	0.023
YBR246W	YBR246W	YER140W	YER140W	0.023
YBR246W	YBR246W	YGR221C	TOS2	0.023
YBR246W	YBR246W	YHL037C	YHL037C	0.023
YBR246W	YBR246W	YIL100W	YIL100W	0.023
YBR246W	YBR246W	YJL037W	IRC18	0.023
YBR246W	YBR246W	YJL078C	PRY3	0.023
YBR246W	YBR246W	YJL084C	ALY2	0.023
YBR246W	YBR246W	YKL117W	SBA1	0.023
YBR246W	YBR246W	YKL216W	URA1	0.023
YBR246W	YBR246W	YKR018C	YKR018C	0.023
YBR246W	YBR246W	YLL017W	YLL017W	0.023
YBR246W	YBR246W	YLR041W	YLR041W	0.023
YBR246W	YBR246W	YLR453C	RIF2	0.023
YBR246W	YBR246W	YMR122C	YMR122C	0.023
YBR246W	YBR246W	YMR133W	REC114	0.023
YBR246W	YBR246W	YMR157C	AIM36	0.023
YBR246W	YBR246W	YNL096C	RPS7B	0.023
YBR246W	YBR246W	YOR079C	ATX2	0.023
YBR246W	YBR246W	YOR082C	YOR082C	0.023
YBR246W	YBR246W	YOR109W	INP53	0.023
YBR246W	YBR246W	YOR333C	YOR333C	0.023
YBR246W	YBR246W	YPL199C	YPL199C	0.023
YBR246W	YBR246W	YBL059W	YBL059W	0.022
YBR246W	YBR246W	YBL069W	AST1	0.022
YBR246W	YBR246W	YBR206W	YBR206W	0.022
YBR246W	YBR246W	YDL012C	YDL012C	0.022
YBR246W	YBR246W	YDR070C	FMP16	0.022
YBR246W	YBR246W	YDR217C	RAD9	0.022
YBR246W	YBR246W	YER119C	AVT6	0.022
YBR246W	YBR246W	YHL032C	GUT1	0.022
YBR246W	YBR246W	YHR086W	NAM8	0.022
YBR246W	YBR246W	YIL155C	GUT2	0.022
YBR246W	YBR246W	YIL159W	BNR1	0.022
YBR246W	YBR246W	YJL030W	MAD2	0.022
YBR246W	YBR246W	YJL144W	YJL144W	0.022
YBR246W	YBR246W	YKL050C	YKL050C	0.022
YBR246W	YBR246W	YKR053C	YSR3	0.022
YBR246W	YBR246W	YLR348C	DIC1	0.022
YBR246W	YBR246W	YML104C	MDM1	0.022
YBR246W	YBR246W	YML106W	URA5	0.022
YBR246W	YBR246W	YML111W	BUL2	0.022
YBR246W	YBR246W	YMR141C	YMR141C	0.022
YBR246W	YBR246W	YNL159C	ASI2	0.022
YBR246W	YBR246W	YOR003W	YSP3	0.022
YBR246W	YBR246W	YPL184C	MRN1	0.022
YBR246W	YBR246W	YBL037W	APL3	0.021
YBR246W	YBR246W	YBL043W	ECM13	0.021
YBR246W	YBR246W	YBR199W	KTR4	0.021
YBR246W	YBR246W	YBR212W	NGR1	0.021
YBR246W	YBR246W	YCL069W	VBA3	0.021
YBR246W	YBR246W	YDL026W	YDL026W	0.021
YBR246W	YBR246W	YDR058C	TGL2	0.021
YBR246W	YBR246W	YDR242W	AMD2	0.021
YBR246W	YBR246W	YDR278C	YDR278C	0.021
YBR246W	YBR246W	YDR316W	OMS1	0.021
YBR246W	YBR246W	YER144C	UBP5	0.021
YBR246W	YBR246W	YGR007W	MUQ1	0.021
YBR246W	YBR246W	YGR093W	DRN1	0.021
YBR246W	YBR246W	YGR210C	YGR210C	0.021
YBR246W	YBR246W	YHL021C	AIM17	0.021
YBR246W	YBR246W	YHR017W	YSC83	0.021
YBR246W	YBR246W	YHR103W	SBE22	0.021
YBR246W	YBR246W	YIL076W	SEC28	0.021
YBR246W	YBR246W	YIL085C	KTR7	0.021
YBR246W	YBR246W	YIL134W	FLX1	0.021
YBR246W	YBR246W	YJL110C	GZF3	0.021
YBR246W	YBR246W	YJR058C	APS2	0.021
YBR246W	YBR246W	YLR057W	YLR057W	0.021
YBR246W	YBR246W	YLR131C	ACE2	0.021
YBR246W	YBR246W	YLR152C	YLR152C	0.021
YBR246W	YBR246W	YLR191W	PEX13	0.021
YBR246W	YBR246W	YLR346C	YLR346C	0.021
YBR246W	YBR246W	YLR408C	YLR408C	0.021
YBR246W	YBR246W	YML002W	YML002W	0.021
YBR246W	YBR246W	YML032C	RAD52	0.021
YBR246W	YBR246W	YMR016C	SOK2	0.021
YBR246W	YBR246W	YNL093W	YPT53	0.021
YBR246W	YBR246W	YOL018C	TLG2	0.021
YBR246W	YBR246W	YOL035C	YOL035C	0.021
YBR246W	YBR246W	YOL136C	PFK27	0.021
YBR246W	YBR246W	YOL162W	YOL162W	0.021
YBR246W	YBR246W	YOR039W	CKB2	0.021
YBR246W	YBR246W	YOR136W	IDH2	0.021
YBR246W	YBR246W	YBR075W	YBR075W	0.02
YBR246W	YBR246W	YBR150C	TBS1	0.02
YBR246W	YBR246W	YBR242W	YBR242W	0.02
YBR246W	YBR246W	YCL009C	ILV6	0.02
YBR246W	YBR246W	YDR213W	UPC2	0.02
YBR246W	YBR246W	YFR023W	PES4	0.02
YBR246W	YBR246W	YGR011W	YGR011W	0.02
YBR246W	YBR246W	YGR023W	MTL1	0.02
YBR246W	YBR246W	YGR069W	YGR069W	0.02
YBR246W	YBR246W	YGR122C-A	YGR122C-A	0.02
YBR246W	YBR246W	YJL099W	CHS6	0.02
YBR246W	YBR246W	YJL196C	ELO1	0.02
YBR246W	YBR246W	YKL023W	YKL023W	0.02
YBR246W	YBR246W	YKL092C	BUD2	0.02
YBR246W	YBR246W	YKR098C	UBP11	0.02
YBR246W	YBR246W	YLR189C	ATG26	0.02
YBR246W	YBR246W	YLR390W	ECM19	0.02
YBR246W	YBR246W	YOR195W	SLK19	0.02
YBR246W	YBR246W	YOR275C	RIM20	0.02
YBR246W	YBR246W	YOR288C	MPD1	0.02
YBR246W	YBR246W	YOR291W	YPK9	0.02
YBR246W	YBR246W	YPL026C	SKS1	0.02
YBR246W	YBR246W	YPL111W	CAR1	0.02
YBR246W	YBR246W	YPL121C	MEI5	0.02
YBR246W	YBR246W	YPR141C	KAR3	0.02
YBR246W	YBR246W	YBR141C	YBR141C	0.019
YBR246W	YBR246W	YBR186W	PCH2	0.019
YBR246W	YBR246W	YBR215W	HPC2	0.019
YBR246W	YBR246W	YDL036C	PUS9	0.019
YBR246W	YBR246W	YDR244W	PEX5	0.019
YBR246W	YBR246W	YDR275W	BSC2	0.019
YBR246W	YBR246W	YER079W	YER079W	0.019
YBR246W	YBR246W	YER080W	AIM9	0.019
YBR246W	YBR246W	YGL132W	YGL132W	0.019
YBR246W	YBR246W	YGR033C	TIM21	0.019
YBR246W	YBR246W	YGR241C	YAP1802	0.019
YBR246W	YBR246W	YHR159W	YHR159W	0.019
YBR246W	YBR246W	YIL141W	YIL141W	0.019
YBR246W	YBR246W	YJL100W	LSB6	0.019
YBR246W	YBR246W	YJR103W	URA8	0.019
YBR246W	YBR246W	YKR039W	GAP1	0.019
YBR246W	YBR246W	YKR088C	TVP38	0.019
YBR246W	YBR246W	YML041C	VPS71	0.019
YBR246W	YBR246W	YML050W	AIM32	0.019
YBR246W	YBR246W	YML075C	HMG1	0.019
YBR246W	YBR246W	YMR316C-A	YMR316C-A	0.019
YBR246W	YBR246W	YNL010W	YNL010W	0.019
YBR246W	YBR246W	YNL077W	APJ1	0.019
YBR246W	YBR246W	YOL111C	MDY2	0.019
YBR246W	YBR246W	YOL153C	YOL153C	0.019
YBR246W	YBR246W	YOR087W	YVC1	0.019
YBR246W	YBR246W	YPL116W	HOS3	0.019
YBR246W	YBR246W	YPL194W	DDC1	0.019
YBR246W	YBR246W	YPL212C	PUS1	0.019
YBR246W	YBR246W	YPR090W	YPR090W	0.019
YBR246W	YBR246W	YPR096C	YPR096C	0.019
YBR246W	YBR246W	YBL082C	ALG3	0.018
YBR246W	YBR246W	YBR103W	SIF2	0.018
YBR246W	YBR246W	YDL234C	GYP7	0.018
YBR246W	YBR246W	YDR142C	PEX7	0.018
YBR246W	YBR246W	YDR149C	YDR149C	0.018
YBR246W	YBR246W	YDR251W	PAM1	0.018
YBR246W	YBR246W	YER188W	YER188W	0.018
YBR246W	YBR246W	YFL013C	IES1	0.018
YBR246W	YBR246W	YFL051C	YFL051C	0.018
YBR246W	YBR246W	YFR007W	YFH7	0.018
YBR246W	YBR246W	YGL029W	CGR1	0.018
YBR246W	YBR246W	YGR018C	YGR018C	0.018
YBR246W	YBR246W	YHL016C	DUR3	0.018
YBR246W	YBR246W	YIL123W	SIM1	0.018
YBR246W	YBR246W	YIL167W	SDL1	0.018
YBR246W	YBR246W	YJL079C	PRY1	0.018
YBR246W	YBR246W	YKL129C	MYO3	0.018
YBR246W	YBR246W	YLR168C	UPS2	0.018
YBR246W	YBR246W	YMR225C	MRPL44	0.018
YBR246W	YBR246W	YNL051W	COG5	0.018
YBR246W	YBR246W	YNR065C	YNR065C	0.018
YBR246W	YBR246W	YOR092W	ECM3	0.018
YBR246W	YBR246W	YOR358W	HAP5	0.018
YBR246W	YBR246W	YPL113C	YPL113C	0.018
YBR246W	YBR246W	YPL138C	SPP1	0.018
YBR246W	YBR246W	YPL186C	UIP4	0.018
YBR246W	YBR246W	YPL232W	SSO1	0.018
YBR246W	YBR246W	YPR158W	CUR1	0.018
YBR246W	YBR246W	YPR191W	QCR2	0.018
YBR246W	YBR246W	YBR030W	RKM3	0.017
YBR246W	YBR246W	YBR050C	REG2	0.017
YBR246W	YBR246W	YBR288C	APM3	0.017
YBR246W	YBR246W	YCR001W	YCR001W	0.017
YBR246W	YBR246W	YCR017C	CWH43	0.017
YBR246W	YBR246W	YCR073W-A	SOL2	0.017
YBR246W	YBR246W	YDL122W	UBP1	0.017
YBR246W	YBR246W	YDR289C	RTT103	0.017
YBR246W	YBR246W	YDR315C	IPK1	0.017
YBR246W	YBR246W	YDR387C	YDR387C	0.017
YBR246W	YBR246W	YDR506C	YDR506C	0.017
YBR246W	YBR246W	YER091C	MET6	0.017
YBR246W	YBR246W	YFL036W	RPO41	0.017
YBR246W	YBR246W	YFR021W	ATG18	0.017
YBR246W	YBR246W	YGR184C	UBR1	0.017
YBR246W	YBR246W	YGR196C	FYV8	0.017
YBR246W	YBR246W	YIL101C	XBP1	0.017
YBR246W	YBR246W	YIL114C	POR2	0.017
YBR246W	YBR246W	YJR053W	BFA1	0.017
YBR246W	YBR246W	YJR137C	ECM17	0.017
YBR246W	YBR246W	YKL115C	YKL115C	0.017
YBR246W	YBR246W	YKL187C	YKL187C	0.017
YBR246W	YBR246W	YKL222C	YKL222C	0.017
YBR246W	YBR246W	YLL055W	YCT1	0.017
YBR246W	YBR246W	YLR315W	NKP2	0.017
YBR246W	YBR246W	YLR400W	YLR400W	0.017
YBR246W	YBR246W	YMR075C-A	YMR075C-A	0.017
YBR246W	YBR246W	YNL143C	YNL143C	0.017
YBR246W	YBR246W	YOL122C	SMF1	0.017
YBR246W	YBR246W	YOR124C	UBP2	0.017
YBR246W	YBR246W	YPL182C	YPL182C	0.017
YBR246W	YBR246W	YPR153W	YPR153W	0.017
YBR246W	YBR246W	YBL070C	YBL070C	0.016
YBR246W	YBR246W	YDL023C	YDL023C	0.016
YBR246W	YBR246W	YDR334W	SWR1	0.016
YBR246W	YBR246W	YDR414C	ERD1	0.016
YBR246W	YBR246W	YFR053C	HXK1	0.016
YBR246W	YBR246W	YFR055W	IRC7	0.016
YBR246W	YBR246W	YGR247W	CPD1	0.016
YBR246W	YBR246W	YHR081W	LRP1	0.016
YBR246W	YBR246W	YHR092C	HXT4	0.016
YBR246W	YBR246W	YHR156C	LIN1	0.016
YBR246W	YBR246W	YIR035C	YIR035C	0.016
YBR246W	YBR246W	YJL042W	MHP1	0.016
YBR246W	YBR246W	YKL184W	SPE1	0.016
YBR246W	YBR246W	YKR027W	BCH2	0.016
YBR246W	YBR246W	YLR136C	TIS11	0.016
YBR246W	YBR246W	YLR324W	PEX30	0.016
YBR246W	YBR246W	YLR351C	NIT3	0.016
YBR246W	YBR246W	YLR356W	YLR356W	0.016
YBR246W	YBR246W	YLR374C	YLR374C	0.016
YBR246W	YBR246W	YLR384C	IKI3	0.016
YBR246W	YBR246W	YML117W	NAB6	0.016
YBR246W	YBR246W	YMR026C	PEX12	0.016
YBR246W	YBR246W	YMR139W	RIM11	0.016
YBR246W	YBR246W	YMR148W	YMR148W	0.016
YBR246W	YBR246W	YMR161W	HLJ1	0.016
YBR246W	YBR246W	YMR316W	DIA1	0.016
YBR246W	YBR246W	YOR021C	YOR021C	0.016
YBR246W	YBR246W	YPL100W	ATG21	0.016
YBR246W	YBR246W	YPL183C	RTT10	0.016
YBR246W	YBR246W	YPR140W	TAZ1	0.016
YBR246W	YBR246W	YBL042C	FUI1	0.015
YBR246W	YBR246W	YBR220C	YBR220C	0.015
YBR246W	YBR246W	YBR227C	MCX1	0.015
YBR246W	YBR246W	YCR024C-A	PMP1	0.015
YBR246W	YBR246W	YER132C	PMD1	0.015
YBR246W	YBR246W	YGR118W	RPS23A	0.015
YBR246W	YBR246W	YHL020C	OPI1	0.015
YBR246W	YBR246W	YHR207C	SET5	0.015
YBR246W	YBR246W	YIL154C	IMP2'	0.015
YBR246W	YBR246W	YJL027C	YJL027C	0.015
YBR246W	YBR246W	YJR010C-A	SPC1	0.015
YBR246W	YBR246W	YKL093W	MBR1	0.015
YBR246W	YBR246W	YKL149C	DBR1	0.015
YBR246W	YBR246W	YLR102C	APC9	0.015
YBR246W	YBR246W	YLR114C	AVL9	0.015
YBR246W	YBR246W	YLR263W	RED1	0.015
YBR246W	YBR246W	YLR386W	VAC14	0.015
YBR246W	YBR246W	YMR259C	YMR259C	0.015
YBR246W	YBR246W	YNL076W	MKS1	0.015
YBR246W	YBR246W	YNL083W	SAL1	0.015
YBR246W	YBR246W	YOL147C	PEX11	0.015
YBR246W	YBR246W	YOR049C	RSB1	0.015
YBR246W	YBR246W	YOR067C	ALG8	0.015
YBR246W	YBR246W	YOR274W	MOD5	0.015
YBR246W	YBR246W	YPL038W	MET31	0.015
YBR246W	YBR246W	YPR078C	YPR078C	0.015
YBR246W	YBR246W	YBR056W	YBR056W	0.014
YBR246W	YBR246W	YBR151W	APD1	0.014
YBR246W	YBR246W	YBR269C	FMP21	0.014
YBR246W	YBR246W	YDR014W	RAD61	0.014
YBR246W	YBR246W	YDR083W	RRP8	0.014
YBR246W	YBR246W	YDR151C	CTH1	0.014
YBR246W	YBR246W	YDR174W	HMO1	0.014
YBR246W	YBR246W	YDR297W	SUR2	0.014
YBR246W	YBR246W	YER135C	YER135C	0.014
YBR246W	YBR246W	YGL236C	MTO1	0.014
YBR246W	YBR246W	YGR008C	STF2	0.014
YBR246W	YBR246W	YGR176W	YGR176W	0.014
YBR246W	YBR246W	YHR080C	YHR080C	0.014
YBR246W	YBR246W	YJL192C	SOP4	0.014
YBR246W	YBR246W	YKR023W	YKR023W	0.014
YBR246W	YBR246W	YLR343W	GAS2	0.014
YBR246W	YBR246W	YML056C	IMD4	0.014
YBR246W	YBR246W	YML058C-A	YML058C-A	0.014
YBR246W	YBR246W	YML121W	GTR1	0.014
YBR246W	YBR246W	YMR095C	SNO1	0.014
YBR246W	YBR246W	YNL095C	YNL095C	0.014
YBR246W	YBR246W	YDL133W	YDL133W	0.013
YBR246W	YBR246W	YDL206W	YDL206W	0.013
YBR246W	YBR246W	YDR122W	KIN1	0.013
YBR246W	YBR246W	YDR326C	YSP2	0.013
YBR246W	YBR246W	YFL043C	YFL043C	0.013
YBR246W	YBR246W	YGL056C	SDS23	0.013
YBR246W	YBR246W	YGL059W	PKP2	0.013
YBR246W	YBR246W	YGL067W	NPY1	0.013
YBR246W	YBR246W	YGL153W	PEX14	0.013
YBR246W	YBR246W	YHR004C	NEM1	0.013
YBR246W	YBR246W	YHR009C	YHR009C	0.013
YBR246W	YBR246W	YHR029C	YHI9	0.013
YBR246W	YBR246W	YJL048C	UBX6	0.013
YBR246W	YBR246W	YJL064W	YJL064W	0.013
YBR246W	YBR246W	YJL119C	YJL119C	0.013
YBR246W	YBR246W	YJR021C	REC107	0.013
YBR246W	YBR246W	YKL069W	YKL069W	0.013
YBR246W	YBR246W	YKR040C	YKR040C	0.013
YBR246W	YBR246W	YKR045C	YKR045C	0.013
YBR246W	YBR246W	YLR032W	RAD5	0.013
YBR246W	YBR246W	YLR112W	YLR112W	0.013
YBR246W	YBR246W	YLR187W	SKG3	0.013
YBR246W	YBR246W	YLR454W	FMP27	0.013
YBR246W	YBR246W	YML058W	SML1	0.013
YBR246W	YBR246W	YML108W	YML108W	0.013
YBR246W	YBR246W	YMR035W	IMP2	0.013
YBR246W	YBR246W	YOR058C	ASE1	0.013
YBR246W	YBR246W	YOR242C	SSP2	0.013
YBR246W	YBR246W	YOR253W	NAT5	0.013
YBR246W	YBR246W	YOR381W	FRE3	0.013
YBR246W	YBR246W	YPL216W	YPL216W	0.013
YBR246W	YBR246W	YPR147C	YPR147C	0.013
YBR246W	YBR246W	YAL048C	GEM1	0.012
YBR246W	YBR246W	YAL055W	PEX22	0.012
YBR246W	YBR246W	YBR161W	CSH1	0.012
YBR246W	YBR246W	YBR216C	YBP1	0.012
YBR246W	YBR246W	YCL016C	DCC1	0.012
YBR246W	YBR246W	YDR094W	YDR094W	0.012
YBR246W	YBR246W	YER164W	CHD1	0.012
YBR246W	YBR246W	YGR003W	CUL3	0.012
YBR246W	YBR246W	YGR192C	TDH3	0.012
YBR246W	YBR246W	YGR248W	SOL4	0.012
YBR246W	YBR246W	YHL047C	ARN2	0.012
YBR246W	YBR246W	YHR061C	GIC1	0.012
YBR246W	YBR246W	YHR180W	YHR180W	0.012
YBR246W	YBR246W	YHR191C	CTF8	0.012
YBR246W	YBR246W	YIL059C	YIL059C	0.012
YBR246W	YBR246W	YJR092W	BUD4	0.012
YBR246W	YBR246W	YKL081W	TEF4	0.012
YBR246W	YBR246W	YLR134W	PDC5	0.012
YBR246W	YBR246W	YLR284C	ECI1	0.012
YBR246W	YBR246W	YLR313C	SPH1	0.012
YBR246W	YBR246W	YLR385C	SWC7	0.012
YBR246W	YBR246W	YMR251W	GTO3	0.012
YBR246W	YBR246W	YMR251W-A	HOR7	0.012
YBR246W	YBR246W	YNL046W	YNL046W	0.012
YBR246W	YBR246W	YOR065W	CYT1	0.012
YBR246W	YBR246W	YOR099W	KTR1	0.012
YBR246W	YBR246W	YOR270C	VPH1	0.012
YBR246W	YBR246W	YOR317W	FAA1	0.012
YBR246W	YBR246W	YOR385W	YOR385W	0.012
YBR246W	YBR246W	YPL162C	YPL162C	0.012
YBR246W	YBR246W	YPR064W	YPR064W	0.012
YBR246W	YBR246W	YBR043C	QDR3	0.011
YBR246W	YBR246W	YDL213C	NOP6	0.011
YBR246W	YBR246W	YDR249C	YDR249C	0.011
YBR246W	YBR246W	YDR401W	YDR401W	0.011
YBR246W	YBR246W	YDR519W	FPR2	0.011
YBR246W	YBR246W	YDR538W	PAD1	0.011
YBR246W	YBR246W	YDR541C	YDR541C	0.011
YBR246W	YBR246W	YER098W	UBP9	0.011
YBR246W	YBR246W	YER153C	PET122	0.011
YBR246W	YBR246W	YFL034W	YFL034W	0.011
YBR246W	YBR246W	YFR030W	MET10	0.011
YBR246W	YBR246W	YGR217W	CCH1	0.011
YBR246W	YBR246W	YIL156W	UBP7	0.011
YBR246W	YBR246W	YIL165C	YIL165C	0.011
YBR246W	YBR246W	YJL017W	YJL017W	0.011
YBR246W	YBR246W	YJL187C	SWE1	0.011
YBR246W	YBR246W	YJR133W	XPT1	0.011
YBR246W	YBR246W	YKL026C	GPX1	0.011
YBR246W	YBR246W	YKR035W-A	DID2	0.011
YBR246W	YBR246W	YKR090W	PXL1	0.011
YBR246W	YBR246W	YKR091W	SRL3	0.011
YBR246W	YBR246W	YLL024C	SSA2	0.011
YBR246W	YBR246W	YLR090W	XDJ1	0.011
YBR246W	YBR246W	YLR438W	CAR2	0.011
YBR246W	YBR246W	YMR178W	YMR178W	0.011
YBR246W	YBR246W	YOL114C	YOL114C	0.011
YBR246W	YBR246W	YOR028C	CIN5	0.011
YBR246W	YBR246W	YOR030W	DFG16	0.011
YBR246W	YBR246W	YOR041C	YOR041C	0.011
YBR246W	YBR246W	YOR265W	RBL2	0.011
YBR246W	YBR246W	YPL227C	ALG5	0.011
YBR246W	YBR246W	YBL003C	HTA2	0.01
YBR246W	YBR246W	YDL066W	IDP1	0.01
YBR246W	YBR246W	YDL155W	CLB3	0.01
YBR246W	YBR246W	YDR068W	DOS2	0.01
YBR246W	YBR246W	YDR093W	DNF2	0.01
YBR246W	YBR246W	YDR144C	MKC7	0.01
YBR246W	YBR246W	YDR420W	HKR1	0.01
YBR246W	YBR246W	YDR466W	PKH3	0.01
YBR246W	YBR246W	YER097W	YER097W	0.01
YBR246W	YBR246W	YFL010C	WWM1	0.01
YBR246W	YBR246W	YGR019W	UGA1	0.01
YBR246W	YBR246W	YGR149W	YGR149W	0.01
YBR246W	YBR246W	YHL039W	YHL039W	0.01
YBR246W	YBR246W	YHL041W	YHL041W	0.01
YBR246W	YBR246W	YIL023C	YKE4	0.01
YBR246W	YBR246W	YIR017C	MET28	0.01
YBR246W	YBR246W	YJL171C	YJL171C	0.01
YBR246W	YBR246W	YJR048W	CYC1	0.01
YBR246W	YBR246W	YKL157W	APE2	0.01
YBR246W	YBR246W	YKR011C	YKR011C	0.01
YBR246W	YBR246W	YKR012C	YKR012C	0.01
YBR246W	YBR246W	YKR080W	MTD1	0.01
YBR246W	YBR246W	YLR171W	YLR171W	0.01
YBR246W	YBR246W	YLR312C	QNQ1	0.01
YBR246W	YBR246W	YMR008C	PLB1	0.01
YBR246W	YBR246W	YNL078W	NIS1	0.01
YBR246W	YBR246W	YOR054C	VHS3	0.01
YBR246W	YBR246W	YOR097C	YOR097C	0.01
YBR246W	YBR246W	YOR214C	YOR214C	0.01
YBR246W	YBR246W	YPL163C	SVS1	0.01
YBR246W	YBR246W	YPR031W	NTO1	0.01
YBR246W	YBR246W	YPR097W	YPR097W	0.01
YBR246W	YBR246W	YAL005C	SSA1	0.009
YBR246W	YBR246W	YAL045C	YAL045C	0.009
YBR246W	YBR246W	YBL100C	YBL100C	0.009
YBR246W	YBR246W	YBR048W	RPS11B	0.009
YBR246W	YBR246W	YDR009W	GAL3	0.009
YBR246W	YBR246W	YDR029W	YDR029W	0.009
YBR246W	YBR246W	YDR085C	AFR1	0.009
YBR246W	YBR246W	YDR263C	DIN7	0.009
YBR246W	YBR246W	YGR135W	PRE9	0.009
YBR246W	YBR246W	YHL028W	WSC4	0.009
YBR246W	YBR246W	YHR125W	YHR125W	0.009
YBR246W	YBR246W	YJL145W	SFH5	0.009
YBR246W	YBR246W	YKL008C	LAC1	0.009
YBR246W	YBR246W	YKL046C	DCW1	0.009
YBR246W	YBR246W	YKL130C	SHE2	0.009
YBR246W	YBR246W	YKL188C	PXA2	0.009
YBR246W	YBR246W	YLR039C	RIC1	0.009
YBR246W	YBR246W	YLR193C	UPS1	0.009
YBR246W	YBR246W	YMR167W	MLH1	0.009
YBR246W	YBR246W	YMR244C-A	YMR244C-A	0.009
YBR246W	YBR246W	YMR280C	CAT8	0.009
YBR246W	YBR246W	YNR048W	YNR048W	0.009
YBR246W	YBR246W	YOL060C	MAM3	0.009
YBR246W	YBR246W	YOL084W	PHM7	0.009
YBR246W	YBR246W	YOL129W	VPS68	0.009
YBR246W	YBR246W	YOR010C	TIR2	0.009
YBR246W	YBR246W	YOR038C	HIR2	0.009
YBR246W	YBR246W	YOR091W	TMA46	0.009
YBR246W	YBR246W	YOR231W	MKK1	0.009
YBR246W	YBR246W	YOR285W	YOR285W	0.009
YBR246W	YBR246W	YPR061C	JID1	0.009
YBR246W	YBR246W	YAL031C	GIP4	0.008
YBR246W	YBR246W	YAL066W	YAL066W	0.008
YBR246W	YBR246W	YBL011W	SCT1	0.008
YBR246W	YBR246W	YCL074W	YCL074W	0.008
YBR246W	YBR246W	YDL086W	YDL086W	0.008
YBR246W	YBR246W	YDR154C	YDR154C	0.008
YBR246W	YBR246W	YER156C	YER156C	0.008
YBR246W	YBR246W	YER174C	GRX4	0.008
YBR246W	YBR246W	YFR047C	BNA6	0.008
YBR246W	YBR246W	YGL085W	YGL085W	0.008
YBR246W	YBR246W	YGL096W	TOS8	0.008
YBR246W	YBR246W	YGR086C	PIL1	0.008
YBR246W	YBR246W	YGR244C	LSC2	0.008
YBR246W	YBR246W	YGR269W	YGR269W	0.008
YBR246W	YBR246W	YHR140W	YHR140W	0.008
YBR246W	YBR246W	YHR182W	YHR182W	0.008
YBR246W	YBR246W	YIL089W	YIL089W	0.008
YBR246W	YBR246W	YIR036C	IRC24	0.008
YBR246W	YBR246W	YKL025C	PAN3	0.008
YBR246W	YBR246W	YKL064W	MNR2	0.008
YBR246W	YBR246W	YKR042W	UTH1	0.008
YBR246W	YBR246W	YKR104W	YKR104W	0.008
YBR246W	YBR246W	YLL059C	YLL059C	0.008
YBR246W	YBR246W	YLR017W	MEU1	0.008
YBR246W	YBR246W	YLR023C	IZH3	0.008
YBR246W	YBR246W	YLR099C	ICT1	0.008
YBR246W	YBR246W	YML027W	YOX1	0.008
YBR246W	YBR246W	YML109W	ZDS2	0.008
YBR246W	YBR246W	YMR154C	RIM13	0.008
YBR246W	YBR246W	YMR294W	JNM1	0.008
YBR246W	YBR246W	YMR316C-B	YMR316C-B	0.008
YBR246W	YBR246W	YNR066C	YNR066C	0.008
YBR246W	YBR246W	YNR074C	AIF1	0.008
YBR246W	YBR246W	YOL027C	MDM38	0.008
YBR246W	YBR246W	YOL059W	GPD2	0.008
YBR246W	YBR246W	YOL095C	HMI1	0.008
YBR246W	YBR246W	YOR126C	IAH1	0.008
YBR246W	YBR246W	YPL036W	PMA2	0.008
YBR246W	YBR246W	YPL178W	CBC2	0.008
YBR246W	YBR246W	YPR022C	YPR022C	0.008
YBR246W	YBR246W	YPR058W	YMC1	0.008
YBR246W	YBR246W	YBR071W	YBR071W	0.007
YBR246W	YBR246W	YCR062W	YCR062W	0.007
YBR246W	YBR246W	YDL082W	RPL13A	0.007
YBR246W	YBR246W	YDR010C	YDR010C	0.007
YBR246W	YBR246W	YDR153C	ENT5	0.007
YBR246W	YBR246W	YDR191W	HST4	0.007
YBR246W	YBR246W	YDR399W	HPT1	0.007
YBR246W	YBR246W	YDR453C	TSA2	0.007
YBR246W	YBR246W	YDR502C	SAM2	0.007
YBR246W	YBR246W	YER053C	PIC2	0.007
YBR246W	YBR246W	YGL032C	AGA2	0.007
YBR246W	YBR246W	YGL082W	YGL082W	0.007
YBR246W	YBR246W	YGL217C	YGL217C	0.007
YBR246W	YBR246W	YGR001C	AML1	0.007
YBR246W	YBR246W	YGR249W	MGA1	0.007
YBR246W	YBR246W	YHR179W	OYE2	0.007
YBR246W	YBR246W	YJL043W	YJL043W	0.007
YBR246W	YBR246W	YJL141C	YAK1	0.007
YBR246W	YBR246W	YKL212W	SAC1	0.007
YBR246W	YBR246W	YLR050C	YLR050C	0.007
YBR246W	YBR246W	YLR368W	MDM30	0.007
YBR246W	YBR246W	YMR101C	SRT1	0.007
YBR246W	YBR246W	YMR162C	DNF3	0.007
YBR246W	YBR246W	YOR238W	YOR238W	0.007
YBR246W	YBR246W	YOR328W	PDR10	0.007
YBR246W	YBR246W	YBL103C	RTG3	0.006
YBR246W	YBR246W	YBR228W	SLX1	0.006
YBR246W	YBR246W	YBR287W	YBR287W	0.006
YBR246W	YBR246W	YDL240W	LRG1	0.006
YBR246W	YBR246W	YDR001C	NTH1	0.006
YBR246W	YBR246W	YDR269C	YDR269C	0.006
YBR246W	YBR246W	YDR270W	CCC2	0.006
YBR246W	YBR246W	YDR430C	CYM1	0.006
YBR246W	YBR246W	YER074W	RPS24A	0.006
YBR246W	YBR246W	YFL004W	VTC2	0.006
YBR246W	YBR246W	YGR233C	PHO81	0.006
YBR246W	YBR246W	YIR019C	MUC1	0.006
YBR246W	YBR246W	YJR070C	LIA1	0.006
YBR246W	YBR246W	YKL136W	YKL136W	0.006
YBR246W	YBR246W	YKL202W	YKL202W	0.006
YBR246W	YBR246W	YKR007W	MEH1	0.006
YBR246W	YBR246W	YLR220W	CCC1	0.006
YBR246W	YBR246W	YLR354C	TAL1	0.006
YBR246W	YBR246W	YMR029C	FAR8	0.006
YBR246W	YBR246W	YMR215W	GAS3	0.006
YBR246W	YBR246W	YMR319C	FET4	0.006
YBR246W	YBR246W	YNL024C	YNL024C	0.006
YBR246W	YBR246W	YNL136W	EAF7	0.006
YBR246W	YBR246W	YOR066W	MSA1	0.006
YBR246W	YBR246W	YOR311C	DGK1	0.006
YBR246W	YBR246W	YPL001W	HAT1	0.006
YBR246W	YBR246W	YBL101C	ECM21	0.005
YBR246W	YBR246W	YBR290W	BSD2	0.005
YBR246W	YBR246W	YBR298C	MAL31	0.005
YBR246W	YBR246W	YDR111C	ALT2	0.005
YBR246W	YBR246W	YGL009C	LEU1	0.005
YBR246W	YBR246W	YGL035C	MIG1	0.005
YBR246W	YBR246W	YHR136C	SPL2	0.005
YBR246W	YBR246W	YJL153C	INO1	0.005
YBR246W	YBR246W	YJL169W	YJL169W	0.005
YBR246W	YBR246W	YKL174C	TPO5	0.005
YBR246W	YBR246W	YKL205W	LOS1	0.005
YBR246W	YBR246W	YLL023C	YLL023C	0.005
YBR246W	YBR246W	YLR296W	YLR296W	0.005
YBR246W	YBR246W	YMR194C-A	YMR194C-A	0.005
YBR246W	YBR246W	YMR255W	GFD1	0.005
YBR246W	YBR246W	YNL134C	YNL134C	0.005
YBR246W	YBR246W	YOR053W	YOR053W	0.005
YBR246W	YBR246W	YOR193W	PEX27	0.005
YBR246W	YBR246W	YPR071W	YPR071W	0.005
YBR246W	YBR246W	YPR089W	YPR089W	0.005
YBR246W	YBR246W	YBL054W	TOD6	0.004
YBR246W	YBR246W	YBR138C	YBR138C	0.004
YBR246W	YBR246W	YBR200W	BEM1	0.004
YBR246W	YBR246W	YCR107W	AAD3	0.004
YBR246W	YBR246W	YDR031W	MIC14	0.004
YBR246W	YBR246W	YER186C	YER186C	0.004
YBR246W	YBR246W	YFL040W	YFL040W	0.004
YBR246W	YBR246W	YGL101W	YGL101W	0.004
YBR246W	YBR246W	YGR038W	ORM1	0.004
YBR246W	YBR246W	YGR256W	GND2	0.004
YBR246W	YBR246W	YIL038C	NOT3	0.004
YBR246W	YBR246W	YIR028W	DAL4	0.004
YBR246W	YBR246W	YJR054W	ERM6	0.004
YBR246W	YBR246W	YJR126C	VPS70	0.004
YBR246W	YBR246W	YKL221W	MCH2	0.004
YBR246W	YBR246W	YKR060W	UTP30	0.004
YBR246W	YBR246W	YLR381W	CTF3	0.004
YBR246W	YBR246W	YML009C	MRPL39	0.004
YBR246W	YBR246W	YML042W	CAT2	0.004
YBR246W	YBR246W	YMR075W	RCO1	0.004
YBR246W	YBR246W	YNL142W	MEP2	0.004
YBR246W	YBR246W	YOL064C	MET22	0.004
YBR246W	YBR246W	YOR006C	TSR3	0.004
YBR246W	YBR246W	YOR016C	ERP4	0.004
YBR246W	YBR246W	YPL062W	YPL062W	0.004
YBR246W	YBR246W	YPR091C	YPR091C	0.004
YBR246W	YBR246W	YPR121W	THI22	0.004
YBR246W	YBR246W	YPR135W	CTF4	0.004
YBR246W	YBR246W	YPR160W	GPH1	0.004
YBR246W	YBR246W	YBR040W	FIG1	0.003
YBR246W	YBR246W	YBR065C	ECM2	0.003
YBR246W	YBR246W	YCR050C	YCR050C	0.003
YBR246W	YBR246W	YDR157W	YDR157W	0.003
YBR246W	YBR246W	YFR012W	YFR012W	0.003
YBR246W	YBR246W	YGL237C	HAP2	0.003
YBR246W	YBR246W	YHL024W	RIM4	0.003
YBR246W	YBR246W	YIL045W	PIG2	0.003
YBR246W	YBR246W	YIL092W	YIL092W	0.003
YBR246W	YBR246W	YJL201W	ECM25	0.003
YBR246W	YBR246W	YKL215C	YKL215C	0.003
YBR246W	YBR246W	YKR010C	TOF2	0.003
YBR246W	YBR246W	YLR018C	POM34	0.003
YBR246W	YBR246W	YLR077W	FMP25	0.003
YBR246W	YBR246W	YLR125W	YLR125W	0.003
YBR246W	YBR246W	YLR254C	NDL1	0.003
YBR246W	YBR246W	YLR282C	YLR282C	0.003
YBR246W	YBR246W	YLR423C	ATG17	0.003
YBR246W	YBR246W	YML030W	AIM31	0.003
YBR246W	YBR246W	YML047C	PRM6	0.003
YBR246W	YBR246W	YML053C	YML053C	0.003
YBR246W	YBR246W	YMR147W	YMR147W	0.003
YBR246W	YBR246W	YMR266W	RSN1	0.003
YBR246W	YBR246W	YNL053W	MSG5	0.003
YBR246W	YBR246W	YOR367W	SCP1	0.003
YBR246W	YBR246W	YAR015W	ADE1	0.002
YBR246W	YBR246W	YBL089W	AVT5	0.002
YBR246W	YBR246W	YBR116C	YBR116C	0.002
YBR246W	YBR246W	YBR197C	YBR197C	0.002
YBR246W	YBR246W	YCL001W-A	YCL001W-A	0.002
YBR246W	YBR246W	YDL093W	PMT5	0.002
YBR246W	YBR246W	YDR248C	YDR248C	0.002
YBR246W	YBR246W	YDR282C	YDR282C	0.002
YBR246W	YBR246W	YGR108W	CLB1	0.002
YBR246W	YBR246W	YJL146W	IDS2	0.002
YBR246W	YBR246W	YJR094W-A	RPL43B	0.002
YBR246W	YBR246W	YKL131W	YKL131W	0.002
YBR246W	YBR246W	YKL208W	CBT1	0.002
YBR246W	YBR246W	YKR094C	RPL40B	0.002
YBR246W	YBR246W	YLR345W	YLR345W	0.002
YBR246W	YBR246W	YLR437C	DIF1	0.002
YBR246W	YBR246W	YML034W	SRC1	0.002
YBR246W	YBR246W	YNL128W	TEP1	0.002
YBR246W	YBR246W	YNR008W	LRO1	0.002
YBR246W	YBR246W	YNR057C	BIO4	0.002
YBR246W	YBR246W	YOL029C	YOL029C	0.002
YBR246W	YBR246W	YOR055W	YOR055W	0.002
YBR246W	YBR246W	YPL081W	RPS9A	0.002
YBR246W	YBR246W	YPR057W	BRR1	0.002
YBR246W	YBR246W	YPR152C	URN1	0.002
YBR246W	YBR246W	YBR232C	YBR232C	0.001
YBR246W	YBR246W	YDR067C	OCA6	0.001
YBR246W	YBR246W	YDR075W	PPH3	0.001
YBR246W	YBR246W	YDR124W	YDR124W	0.001
YBR246W	YBR246W	YDR285W	ZIP1	0.001
YBR246W	YBR246W	YDR517W	GRH1	0.001
YBR246W	YBR246W	YDR534C	FIT1	0.001
YBR246W	YBR246W	YGL131C	SNT2	0.001
YBR246W	YBR246W	YGL254W	FZF1	0.001
YBR246W	YBR246W	YGR105W	VMA21	0.001
YBR246W	YBR246W	YJL068C	YJL068C	0.001
YBR246W	YBR246W	YJL163C	YJL163C	0.001
YBR246W	YBR246W	YKR041W	YKR041W	0.001
YBR246W	YBR246W	YLL014W	EMC6	0.001
YBR246W	YBR246W	YLL016W	SDC25	0.001
YBR246W	YBR246W	YLR271W	YLR271W	0.001
YBR246W	YBR246W	YOL019W	YOL019W	0.001
YBR246W	YBR246W	YOR221C	MCT1	0.001
[truncated: 1,885 more rows]

## Sheet: YLR143W
ORF1	Gene1	ORF2	Gene2	Correlation
YLR143W	YLR143W	YLR172C	DPH5	0.273
YLR143W	YLR143W	YKR084C	HBS1	0.199
YLR143W	YLR143W	YJR097W	DPH4/DPH4/JJJ3	0.189
YLR143W	YLR143W	YKL191W	DPH2	0.188
YLR143W	YLR143W	YLR165C	PUS5	0.168
YLR143W	YLR143W	YBR246W	YBR246W	0.16
YLR143W	YLR143W	YMR096W	SNZ1	0.155
YLR143W	YLR143W	YLR265C	NEJ1	0.146
YLR143W	YLR143W	YIL103W	DPH1	0.144
YLR143W	YLR143W	YDR072C	IPT1	0.136
YLR143W	YLR143W	YPL068C	YPL068C	0.125
YLR143W	YLR143W	YGL213C	SKI8	0.124
YLR143W	YLR143W	YNL001W	DOM34	0.124
YLR143W	YLR143W	YNL130C	CPT1	0.124
YLR143W	YLR143W	YPL018W	CTF19	0.123
YLR143W	YLR143W	YLR390W	ECM19	0.119
YLR143W	YLR143W	YLR410W	VIP1	0.118
YLR143W	YLR143W	YCR077C	PAT1	0.117
YLR143W	YLR143W	YKR042W	UTH1	0.116
YLR143W	YLR143W	YLR228C	ECM22	0.116
YLR143W	YLR143W	YJL124C	LSM1	0.115
YLR143W	YLR143W	YER158C	YER158C	0.113
YLR143W	YLR143W	YKL147C	YKL147C	0.113
YLR143W	YLR143W	YPL145C	KES1	0.113
YLR143W	YLR143W	YKL077W	YKL077W	0.112
YLR143W	YLR143W	YLR218C	YLR218C	0.112
YLR143W	YLR143W	YGL050W	TYW3	0.111
YLR143W	YLR143W	YGL124C	MON1	0.111
YLR143W	YLR143W	YDR385W	EFT2	0.11
YLR143W	YLR143W	YML107C	PML39	0.11
YLR143W	YLR143W	YDR111C	ALT2	0.108
YLR143W	YLR143W	YDR155C	CPR1	0.108
YLR143W	YLR143W	YOR094W	ARF3	0.108
YLR143W	YLR143W	YOR167C	RPS28A	0.108
YLR143W	YLR143W	YPL017C	IRC15	0.108
YLR143W	YLR143W	YLR264W	RPS28B	0.106
YLR143W	YLR143W	YMR118C	YMR118C	0.106
YLR143W	YLR143W	YKL149C	DBR1	0.105
YLR143W	YLR143W	YOR039W	CKB2	0.105
YLR143W	YLR143W	YLR046C	YLR046C	0.104
YLR143W	YLR143W	YDR372C	VPS74	0.103
YLR143W	YLR143W	YLR451W	LEU3	0.103
YLR143W	YLR143W	YFR017C	YFR017C	0.102
YLR143W	YLR143W	YGL006W	PMC1	0.102
YLR143W	YLR143W	YGL071W	AFT1	0.102
YLR143W	YLR143W	YGR187C	HGH1	0.102
YLR143W	YLR143W	YML016C	PPZ1	0.102
YLR143W	YLR143W	YKL093W	MBR1	0.101
YLR143W	YLR143W	YKR009C	FOX2	0.101
YLR143W	YLR143W	YML001W	YPT7	0.101
YLR143W	YLR143W	YGR184C	UBR1	0.1
YLR143W	YLR143W	YLR389C	STE23	0.1
YLR143W	YLR143W	YLR414C	YLR414C	0.1
YLR143W	YLR143W	YMR075W	RCO1	0.1
YLR143W	YLR143W	YDR099W	BMH2	0.099
YLR143W	YLR143W	YGL090W	LIF1	0.098
YLR143W	YLR143W	YGL146C	YGL146C	0.098
YLR143W	YLR143W	YML035C	AMD1	0.098
YLR143W	YLR143W	YGR178C	PBP1	0.097
YLR143W	YLR143W	YLR142W	PUT1	0.097
YLR143W	YLR143W	YOR037W	CYC2	0.097
YLR143W	YLR143W	YPR160W	GPH1	0.097
YLR143W	YLR143W	YHR076W	PTC7	0.096
YLR143W	YLR143W	YKR055W	RHO4	0.096
YLR143W	YLR143W	YPL183C	RTT10	0.096
YLR143W	YLR143W	YGR263C	SAY1	0.094
YLR143W	YLR143W	YHR146W	CRP1	0.094
YLR143W	YLR143W	YJL053W	PEP8	0.094
YLR143W	YLR143W	YGL224C	SDT1	0.093
YLR143W	YLR143W	YKL090W	CUE2	0.093
YLR143W	YLR143W	YLR130C	ZRT2	0.093
YLR143W	YLR143W	YMR099C	YMR099C	0.093
YLR143W	YLR143W	YNL135C	FPR1	0.093
YLR143W	YLR143W	YDL128W	VCX1	0.092
YLR143W	YLR143W	YHR014W	SPO13	0.092
YLR143W	YLR143W	YLR371W	ROM2	0.092
YLR143W	YLR143W	YPL021W	ECM23	0.092
YLR143W	YLR143W	YBR085W	AAC3	0.091
YLR143W	YLR143W	YKL056C	TMA19	0.091
YLR143W	YLR143W	YLR315W	NKP2	0.091
YLR143W	YLR143W	YMR252C	YMR252C	0.091
YLR143W	YLR143W	YOR136W	IDH2	0.091
YLR143W	YLR143W	YDR156W	RPA14	0.09
YLR143W	YLR143W	YMR230W	RPS10B	0.09
YLR143W	YLR143W	YNL078W	NIS1	0.09
YLR143W	YLR143W	YPL056C	YPL056C	0.09
YLR143W	YLR143W	YBL059W	YBL059W	0.089
YLR143W	YLR143W	YJR008W	YJR008W	0.089
YLR143W	YLR143W	YKL034W	TUL1	0.089
YLR143W	YLR143W	YDR393W	SHE9	0.088
YLR143W	YLR143W	YGR266W	YGR266W	0.088
YLR143W	YLR143W	YIR031C	DAL7	0.088
YLR143W	YLR143W	YJL047C	RTT101	0.088
YLR143W	YLR143W	YMR258C	YMR258C	0.088
YLR143W	YLR143W	YNL125C	ESBP6	0.088
YLR143W	YLR143W	YOR061W	CKA2	0.088
YLR143W	YLR143W	YPR167C	MET16	0.088
YLR143W	YLR143W	YGR109C	CLB6	0.087
YLR143W	YLR143W	YLR406C	RPL31B	0.087
YLR143W	YLR143W	YBL100C	YBL100C	0.086
YLR143W	YLR143W	YBR041W	FAT1	0.086
YLR143W	YLR143W	YGL019W	CKB1	0.086
YLR143W	YLR143W	YGR025W	YGR025W	0.086
YLR143W	YLR143W	YLR125W	YLR125W	0.086
YLR143W	YLR143W	YNL156C	NSG2	0.086
YLR143W	YLR143W	YOR324C	FRT1	0.086
YLR143W	YLR143W	YBR180W	DTR1	0.085
YLR143W	YLR143W	YKL007W	CAP1	0.085
YLR143W	YLR143W	YOR126C	IAH1	0.085
YLR143W	YLR143W	YPL035C	YPL035C	0.085
YLR143W	YLR143W	YPL184C	MRN1	0.085
YLR143W	YLR143W	YPL240C	HSP82	0.083
YLR143W	YLR143W	YDR254W	CHL4	0.082
YLR143W	YLR143W	YGL227W	VID30	0.082
YLR143W	YLR143W	YLR376C	PSY3	0.082
YLR143W	YLR143W	YMR119W	ASI1	0.082
YLR143W	YLR143W	YNL045W	YNL045W	0.082
YLR143W	YLR143W	YPR156C	TPO3	0.082
YLR143W	YLR143W	YJL117W	PHO86	0.081
YLR143W	YLR143W	YKL050C	YKL050C	0.081
YLR143W	YLR143W	YML029W	USA1	0.081
YLR143W	YLR143W	YMR010W	YMR010W	0.081
YLR143W	YLR143W	YMR017W	SPO20	0.081
YLR143W	YLR143W	YNL080C	EOS1	0.081
YLR143W	YLR143W	YKL124W	SSH4	0.08
YLR143W	YLR143W	YLR176C	RFX1	0.08
YLR143W	YLR143W	YNL136W	EAF7	0.08
YLR143W	YLR143W	YOR235W	IRC13	0.08
YLR143W	YLR143W	YPL223C	GRE1	0.08
YLR143W	YLR143W	YBL017C	PEP1	0.079
YLR143W	YLR143W	YHR108W	GGA2	0.079
YLR143W	YLR143W	YHR114W	BZZ1	0.079
YLR143W	YLR143W	YIL053W	RHR2	0.079
YLR143W	YLR143W	YJL070C	YJL070C	0.079
YLR143W	YLR143W	YJL161W	FMP33	0.079
YLR143W	YLR143W	YLR001C	YLR001C	0.079
YLR143W	YLR143W	YLR004C	THI73	0.079
YLR143W	YLR143W	YLR112W	YLR112W	0.079
YLR143W	YLR143W	YMR011W	HXT2	0.079
YLR143W	YLR143W	YNL022C	YNL022C	0.079
YLR143W	YLR143W	YBR260C	RGD1	0.078
YLR143W	YLR143W	YDL099W	BUG1	0.078
YLR143W	YLR143W	YLR354C	TAL1	0.078
YLR143W	YLR143W	YER091C	MET6	0.077
YLR143W	YLR143W	YGR254W	ENO1	0.077
YLR143W	YLR143W	YJL024C	APS3	0.077
YLR143W	YLR143W	YJL036W	SNX4	0.077
YLR143W	YLR143W	YJL152W	YJL152W	0.077
YLR143W	YLR143W	YKR087C	OMA1	0.077
YLR143W	YLR143W	YNL120C	YNL120C	0.077
YLR143W	YLR143W	YNL140C	YNL140C	0.077
YLR143W	YLR143W	YPL081W	RPS9A	0.077
YLR143W	YLR143W	YDL216C	RRI1	0.076
YLR143W	YLR143W	YDR154C	YDR154C	0.076
YLR143W	YLR143W	YDR315C	IPK1	0.076
YLR143W	YLR143W	YGL229C	SAP4	0.076
YLR143W	YLR143W	YGL242C	YGL242C	0.076
YLR143W	YLR143W	YHL041W	YHL041W	0.076
YLR143W	YLR143W	YMR136W	GAT2	0.076
YLR143W	YLR143W	YPL168W	YPL168W	0.076
YLR143W	YLR143W	YAR014C	BUD14	0.075
YLR143W	YLR143W	YCL063W	VAC17	0.075
YLR143W	YLR143W	YFR031C-A	RPL2A	0.075
YLR143W	YLR143W	YIL155C	GUT2	0.075
YLR143W	YLR143W	YJR036C	HUL4	0.075
YLR143W	YLR143W	YKR024C	DBP7	0.075
YLR143W	YLR143W	YMR306C-A	YMR306C-A	0.075
YLR143W	YLR143W	YAL019W	FUN30	0.074
YLR143W	YLR143W	YBR111C	YSA1	0.074
YLR143W	YLR143W	YFL006W	YFL006W	0.074
YLR143W	YLR143W	YKL023W	YKL023W	0.074
YLR143W	YLR143W	YMR080C	NAM7	0.074
YLR143W	YLR143W	YMR164C	MSS11	0.074
YLR143W	YLR143W	YMR237W	BCH1	0.074
YLR143W	YLR143W	YDR519W	FPR2	0.073
YLR143W	YLR143W	YGR138C	TPO2	0.073
YLR143W	YLR143W	YIL158W	AIM20	0.073
YLR143W	YLR143W	YJL030W	MAD2	0.073
YLR143W	YLR143W	YOR115C	TRS33	0.073
YLR143W	YLR143W	YAL004W	YAL004W	0.072
YLR143W	YLR143W	YCL062W	YCL062W	0.072
YLR143W	YLR143W	YDR014W	RAD61	0.072
YLR143W	YLR143W	YGL014W	PUF4	0.072
YLR143W	YLR143W	YHR004C	NEM1	0.072
YLR143W	YLR143W	YHR087W	RTC3	0.072
YLR143W	YLR143W	YMR078C	CTF18	0.072
YLR143W	YLR143W	YDL167C	NRP1	0.071
YLR143W	YLR143W	YDR318W	MCM21	0.071
YLR143W	YLR143W	YGR236C	SPG1	0.071
YLR143W	YLR143W	YJR050W	ISY1	0.071
YLR143W	YLR143W	YLR221C	RSA3	0.071
YLR143W	YLR143W	YML117W	NAB6	0.071
YLR143W	YLR143W	YMR103C	YMR103C	0.071
YLR143W	YLR143W	YNR041C	COQ2	0.071
YLR143W	YLR143W	YLR050C	YLR050C	0.07
YLR143W	YLR143W	YLR200W	YKE2	0.07
YLR143W	YLR143W	YLR292C	SEC72	0.07
YLR143W	YLR143W	YMR255W	GFD1	0.07
YLR143W	YLR143W	YMR316W	DIA1	0.07
YLR143W	YLR143W	YOR038C	HIR2	0.07
YLR143W	YLR143W	YCL012W	YCL012W	0.069
YLR143W	YLR143W	YCL049C	YCL049C	0.069
YLR143W	YLR143W	YDR116C	MRPL1	0.069
YLR143W	YLR143W	YDR371W	CTS2	0.069
YLR143W	YLR143W	YGL153W	PEX14	0.069
YLR143W	YLR143W	YGR209C	TRX2	0.069
YLR143W	YLR143W	YHR191C	CTF8	0.069
YLR143W	YLR143W	YJL073W	JEM1	0.069
YLR143W	YLR143W	YJR033C	RAV1	0.069
YLR143W	YLR143W	YML090W	YML090W	0.069
YLR143W	YLR143W	YMR285C	NGL2	0.069
YLR143W	YLR143W	YOR338W	YOR338W	0.069
YLR143W	YLR143W	YPL052W	OAZ1	0.069
YLR143W	YLR143W	YPR023C	EAF3	0.069
YLR143W	YLR143W	YBR185C	MBA1	0.068
YLR143W	YLR143W	YBR287W	YBR287W	0.068
YLR143W	YLR143W	YGR189C	CRH1	0.068
YLR143W	YLR143W	YGR196C	FYV8	0.068
YLR143W	YLR143W	YHL023C	RMD11	0.068
YLR143W	YLR143W	YHR139C-A	YHR139C-A	0.068
YLR143W	YLR143W	YKL120W	OAC1	0.068
YLR143W	YLR143W	YLR289W	GUF1	0.068
YLR143W	YLR143W	YML007W	YAP1	0.068
YLR143W	YLR143W	YML038C	YMD8	0.068
YLR143W	YLR143W	YMR031C	YMR031C	0.068
YLR143W	YLR143W	YMR075C-A	YMR075C-A	0.068
YLR143W	YLR143W	YNL144C	YNL144C	0.068
YLR143W	YLR143W	YOL098C	YOL098C	0.068
YLR143W	YLR143W	YOR376W	YOR376W	0.068
YLR143W	YLR143W	YAL020C	ATS1	0.067
YLR143W	YLR143W	YDL048C	STP4	0.067
YLR143W	YLR143W	YDR329C	PEX3	0.067
YLR143W	YLR143W	YGR131W	YGR131W	0.067
YLR143W	YLR143W	YGR289C	MAL11	0.067
YLR143W	YLR143W	YHR136C	SPL2	0.067
YLR143W	YLR143W	YJL120W	YJL120W	0.067
YLR143W	YLR143W	YJL191W	RPS14B	0.067
YLR143W	YLR143W	YKR041W	YKR041W	0.067
YLR143W	YLR143W	YLR427W	MAG2	0.067
YLR143W	YLR143W	YMR123W	PKR1	0.067
YLR143W	YLR143W	YAR018C	KIN3	0.066
YLR143W	YLR143W	YGR231C	PHB2	0.066
YLR143W	YLR143W	YGR243W	FMP43	0.066
YLR143W	YLR143W	YHR160C	PEX18	0.066
YLR143W	YLR143W	YLR341W	SPO77	0.066
YLR143W	YLR143W	YMR044W	IOC4	0.066
YLR143W	YLR143W	YNL008C	ASI3	0.066
YLR143W	YLR143W	YNL153C	GIM3	0.066
YLR143W	YLR143W	YOR097C	YOR097C	0.066
YLR143W	YLR143W	YOR135C	IRC14	0.066
YLR143W	YLR143W	YPR031W	NTO1	0.066
YLR143W	YLR143W	YPR079W	MRL1	0.066
YLR143W	YLR143W	YJR125C	ENT3	0.065
YLR143W	YLR143W	YLR124W	YLR124W	0.065
YLR143W	YLR143W	YNL037C	IDH1	0.065
YLR143W	YLR143W	YNL129W	NRK1	0.065
YLR143W	YLR143W	YNR051C	BRE5	0.065
YLR143W	YLR143W	YOR243C	PUS7	0.065
YLR143W	YLR143W	YPL232W	SSO1	0.065
YLR143W	YLR143W	YGR039W	YGR039W	0.064
YLR143W	YLR143W	YGR096W	TPC1	0.064
YLR143W	YLR143W	YIL005W	EPS1	0.064
YLR143W	YLR143W	YIL108W	YIL108W	0.064
YLR143W	YLR143W	YIR028W	DAL4	0.064
YLR143W	YLR143W	YJL148W	RPA34	0.064
YLR143W	YLR143W	YLR188W	MDL1	0.064
YLR143W	YLR143W	YLR441C	RPS1A	0.064
YLR143W	YLR143W	YML026C	RPS18B	0.064
YLR143W	YLR143W	YNR024W	MPP6	0.064
YLR143W	YLR143W	YPL046C	ELC1	0.064
YLR143W	YLR143W	YPR012W	YPR012W	0.064
YLR143W	YLR143W	YPR150W	YPR150W	0.064
YLR143W	YLR143W	YBL075C	SSA3	0.063
YLR143W	YLR143W	YDR134C	YDR134C	0.063
YLR143W	YLR143W	YDR482C	CWC21	0.063
YLR143W	YLR143W	YER079W	YER079W	0.063
YLR143W	YLR143W	YFR018C	YFR018C	0.063
YLR143W	YLR143W	YGR169C	PUS6	0.063
YLR143W	YLR143W	YHR066W	SSF1	0.063
YLR143W	YLR143W	YKL200C	YKL200C	0.063
YLR143W	YLR143W	YKR089C	TGL4	0.063
YLR143W	YLR143W	YLR392C	YLR392C	0.063
YLR143W	YLR143W	YNL003C	PET8	0.063
YLR143W	YLR143W	YNR007C	ATG3	0.063
YLR143W	YLR143W	YOR309C	YOR309C	0.063
YLR143W	YLR143W	YPL212C	PUS1	0.063
YLR143W	YLR143W	YCL038C	ATG22	0.062
YLR143W	YLR143W	YDR125C	ECM18	0.062
YLR143W	YLR143W	YDR358W	GGA1	0.062
YLR143W	YLR143W	YER093C-A	AIM11	0.062
YLR143W	YLR143W	YHR133C	NSG1	0.062
YLR143W	YLR143W	YKL081W	TEF4	0.062
YLR143W	YLR143W	YKL185W	ASH1	0.062
YLR143W	YLR143W	YKR067W	GPT2	0.062
YLR143W	YLR143W	YLR453C	RIF2	0.062
YLR143W	YLR143W	YMR163C	INP2	0.062
YLR143W	YLR143W	YNL063W	MTQ1	0.062
YLR143W	YLR143W	YNL086W	YNL086W	0.062
YLR143W	YLR143W	YOR010C	TIR2	0.062
YLR143W	YLR143W	YOR163W	DDP1	0.062
YLR143W	YLR143W	YOR166C	SWT1	0.062
YLR143W	YLR143W	YCL074W	YCL074W	0.061
YLR143W	YLR143W	YDL104C	QRI7	0.061
YLR143W	YLR143W	YDR126W	SWF1	0.061
YLR143W	YLR143W	YER123W	YCK3	0.061
YLR143W	YLR143W	YJL044C	GYP6	0.061
YLR143W	YLR143W	YKR016W	AIM28	0.061
YLR143W	YLR143W	YLR266C	PDR8	0.061
YLR143W	YLR143W	YNL098C	RAS2	0.061
YLR143W	YLR143W	YOR078W	BUD21	0.061
YLR143W	YLR143W	YPL069C	BTS1	0.061
YLR143W	YLR143W	YPL236C	ENV7	0.061
YLR143W	YLR143W	YGR248W	SOL4	0.06
YLR143W	YLR143W	YKL070W	YKL070W	0.06
YLR143W	YLR143W	YKL187C	YKL187C	0.06
YLR143W	YLR143W	YLL010C	PSR1	0.06
YLR143W	YLR143W	YLL058W	YLL058W	0.06
YLR143W	YLR143W	YML054C	CYB2	0.06
YLR143W	YLR143W	YMR215W	GAS3	0.06
YLR143W	YLR143W	YNL051W	COG5	0.06
YLR143W	YLR143W	YOL025W	LAG2	0.06
YLR143W	YLR143W	YOR363C	PIP2	0.06
YLR143W	YLR143W	YPR153W	YPR153W	0.06
YLR143W	YLR143W	YDL229W	SSB1	0.059
YLR143W	YLR143W	YDR360W	OPI7	0.059
YLR143W	YLR143W	YDR431W	YDR431W	0.059
YLR143W	YLR143W	YDR534C	FIT1	0.059
YLR143W	YLR143W	YDR540C	IRC4	0.059
YLR143W	YLR143W	YFR054C	YFR054C	0.059
YLR143W	YLR143W	YGL248W	PDE1	0.059
YLR143W	YLR143W	YGR259C	YGR259C	0.059
YLR143W	YLR143W	YGR291C	YGR291C	0.059
YLR143W	YLR143W	YKR019C	IRS4	0.059
YLR143W	YLR143W	YMR048W	CSM3	0.059
YLR143W	YLR143W	YMR187C	YMR187C	0.059
YLR143W	YLR143W	YNL042W	BOP3	0.059
YLR143W	YLR143W	YOR090C	PTC5	0.059
YLR143W	YLR143W	YPL026C	SKS1	0.059
YLR143W	YLR143W	YDR313C	PIB1	0.058
YLR143W	YLR143W	YDR505C	PSP1	0.058
YLR143W	YLR143W	YHL020C	OPI1	0.058
YLR143W	YLR143W	YJR070C	LIA1	0.058
YLR143W	YLR143W	YKL123W	YKL123W	0.058
YLR143W	YLR143W	YKR013W	PRY2	0.058
YLR143W	YLR143W	YOR009W	TIR4	0.058
YLR143W	YLR143W	YOR131C	YOR131C	0.058
YLR143W	YLR143W	YOR265W	RBL2	0.058
YLR143W	YLR143W	YPR017C	DSS4	0.058
YLR143W	YLR143W	YAL051W	OAF1	0.057
YLR143W	YLR143W	YBR245C	ISW1	0.057
YLR143W	YLR143W	YDR184C	ATC1	0.057
YLR143W	YLR143W	YFR046C	CNN1	0.057
YLR143W	YLR143W	YGL218W	YGL218W	0.057
YLR143W	YLR143W	YGL234W	ADE5,7	0.057
YLR143W	YLR143W	YHR015W	MIP6	0.057
YLR143W	YLR143W	YHR035W	YHR035W	0.057
YLR143W	YLR143W	YMR233W	TRI1	0.057
YLR143W	YLR143W	YNR042W	YNR042W	0.057
YLR143W	YLR143W	YOR051C	YOR051C	0.057
YLR143W	YLR143W	YCR060W	TAH1	0.056
YLR143W	YLR143W	YDR179W-A	YDR179W-A	0.056
YLR143W	YLR143W	YDR210W	YDR210W	0.056
YLR143W	YLR143W	YDR247W	VHS1	0.056
YLR143W	YLR143W	YDR541C	YDR541C	0.056
YLR143W	YLR143W	YFL030W	AGX1	0.056
YLR143W	YLR143W	YLR044C	PDC1	0.056
YLR143W	YLR143W	YLR063W	YLR063W	0.056
YLR143W	YLR143W	YLR120C	YPS1	0.056
YLR143W	YLR143W	YLR216C	CPR6	0.056
YLR143W	YLR143W	YLR224W	YLR224W	0.056
YLR143W	YLR143W	YML071C	COG8	0.056
YLR143W	YLR143W	YML074C	FPR3	0.056
YLR143W	YLR143W	YNL035C	YNL035C	0.056
YLR143W	YLR143W	YOR087W	YVC1	0.056
YLR143W	YLR143W	YOR133W	EFT1	0.056
YLR143W	YLR143W	YOR386W	PHR1	0.056
YLR143W	YLR143W	YPL108W	YPL108W	0.056
YLR143W	YLR143W	YAL037W	YAL037W	0.055
YLR143W	YLR143W	YBR107C	IML3	0.055
YLR143W	YLR143W	YBR141C	YBR141C	0.055
YLR143W	YLR143W	YFR013W	IOC3	0.055
YLR143W	YLR143W	YGL236C	MTO1	0.055
YLR143W	YLR143W	YGR290W	YGR290W	0.055
YLR143W	YLR143W	YHR180W	YHR180W	0.055
YLR143W	YLR143W	YKR092C	SRP40	0.055
YLR143W	YLR143W	YLR334C	YLR334C	0.055
YLR143W	YLR143W	YLR432W	IMD3	0.055
YLR143W	YLR143W	YML050W	AIM32	0.055
YLR143W	YLR143W	YML119W	YML119W	0.055
YLR143W	YLR143W	YMR245W	YMR245W	0.055
YLR143W	YLR143W	YMR310C	YMR310C	0.055
YLR143W	YLR143W	YOL047C	YOL047C	0.055
YLR143W	YLR143W	YOL128C	YGK3	0.055
YLR143W	YLR143W	YOR221C	MCT1	0.055
YLR143W	YLR143W	YPL197C	YPL197C	0.055
YLR143W	YLR143W	YPR001W	CIT3	0.055
YLR143W	YLR143W	YBR067C	TIP1	0.054
YLR143W	YLR143W	YBR215W	HPC2	0.054
YLR143W	YLR143W	YER091C-A	YER091C-A	0.054
YLR143W	YLR143W	YGL157W	YGL157W	0.054
YLR143W	YLR143W	YHR021W-A	ECM12	0.054
YLR143W	YLR143W	YJR103W	URA8	0.054
YLR143W	YLR143W	YLR375W	STP3	0.054
YLR143W	YLR143W	YMR266W	RSN1	0.054
YLR143W	YLR143W	YNL107W	YAF9	0.054
YLR143W	YLR143W	YNR001C	CIT1	0.054
YLR143W	YLR143W	YNR005C	YNR005C	0.054
YLR143W	YLR143W	YOL030W	GAS5	0.054
YLR143W	YLR143W	YOL112W	MSB4	0.054
YLR143W	YLR143W	YOR066W	MSA1	0.054
YLR143W	YLR143W	YPL048W	CAM1	0.054
YLR143W	YLR143W	YBR148W	YSW1	0.053
YLR143W	YLR143W	YBR296C	PHO89	0.053
YLR143W	YLR143W	YDR395W	SXM1	0.053
YLR143W	YLR143W	YFL003C	MSH4	0.053
YLR143W	YLR143W	YGL004C	RPN14	0.053
YLR143W	YLR143W	YGL031C	RPL24A	0.053
YLR143W	YLR143W	YGL258W	VEL1	0.053
YLR143W	YLR143W	YGR021W	YGR021W	0.053
YLR143W	YLR143W	YIR019C	MUC1	0.053
YLR143W	YLR143W	YJL094C	KHA1	0.053
YLR143W	YLR143W	YKL132C	RMA1	0.053
YLR143W	YLR143W	YLR049C	YLR049C	0.053
YLR143W	YLR143W	YLR179C	YLR179C	0.053
YLR143W	YLR143W	YLR360W	VPS38	0.053
YLR143W	YLR143W	YMR127C	SAS2	0.053
YLR143W	YLR143W	YOR192C	THI72	0.053
YLR143W	YLR143W	YPL057C	SUR1	0.053
YLR143W	YLR143W	YPL120W	VPS30	0.053
YLR143W	YLR143W	YBL048W	RRT1	0.052
YLR143W	YLR143W	YBR271W	YBR271W	0.052
YLR143W	YLR143W	YCR050C	YCR050C	0.052
YLR143W	YLR143W	YDL114W	YDL114W	0.052
YLR143W	YLR143W	YDL146W	LDB17	0.052
YLR143W	YLR143W	YDR029W	YDR029W	0.052
YLR143W	YLR143W	YDR104C	SPO71	0.052
YLR143W	YLR143W	YDR286C	YDR286C	0.052
YLR143W	YLR143W	YGL039W	YGL039W	0.052
YLR143W	YLR143W	YJL017W	YJL017W	0.052
YLR143W	YLR143W	YKR051W	YKR051W	0.052
YLR143W	YLR143W	YKR053C	YSR3	0.052
YLR143W	YLR143W	YLR269C	YLR269C	0.052
YLR143W	YLR143W	YLR388W	RPS29A	0.052
YLR143W	YLR143W	YMR137C	PSO2	0.052
YLR143W	YLR143W	YMR192W	GYL1	0.052
YLR143W	YLR143W	YNL030W	HHF2	0.052
YLR143W	YLR143W	YNL072W	RNH201	0.052
YLR143W	YLR143W	YNR040W	YNR040W	0.052
YLR143W	YLR143W	YOR019W	YOR019W	0.052
YLR143W	YLR143W	YPL156C	PRM4	0.052
YLR143W	YLR143W	YBR118W	TEF2	0.051
YLR143W	YLR143W	YCL022C	YCL022C	0.051
YLR143W	YLR143W	YGL104C	VPS73	0.051
YLR143W	YLR143W	YGR146C	YGR146C	0.051
YLR143W	YLR143W	YHR033W	YHR033W	0.051
YLR143W	YLR143W	YJL170C	ASG7	0.051
YLR143W	YLR143W	YJL186W	MNN5	0.051
YLR143W	YLR143W	YKR058W	GLG1	0.051
YLR143W	YLR143W	YLL012W	YEH1	0.051
YLR143W	YLR143W	YLR421C	RPN13	0.051
YLR143W	YLR143W	YMR133W	REC114	0.051
YLR143W	YLR143W	YNR020C	ATP23	0.051
YLR143W	YLR143W	YOL014W	YOL014W	0.051
YLR143W	YLR143W	YOR076C	SKI7	0.051
YLR143W	YLR143W	YPR057W	BRR1	0.051
YLR143W	YLR143W	YCR088W	ABP1	0.05
YLR143W	YLR143W	YER090W	TRP2	0.05
YLR143W	YLR143W	YGL057C	YGL057C	0.05
YLR143W	YLR143W	YGR121C	MEP1	0.05
YLR143W	YLR143W	YGR124W	ASN2	0.05
YLR143W	YLR143W	YHL032C	GUT1	0.05
YLR143W	YLR143W	YLR111W	YLR111W	0.05
YLR143W	YLR143W	YLR438W	CAR2	0.05
YLR143W	YLR143W	YMR109W	MYO5	0.05
YLR143W	YLR143W	YOR064C	YNG1	0.05
YLR143W	YLR143W	YPL253C	VIK1	0.05
YLR143W	YLR143W	YAL005C	SSA1	0.049
YLR143W	YLR143W	YBL001C	ECM15	0.049
YLR143W	YLR143W	YBL065W	YBL065W	0.049
YLR143W	YLR143W	YDL240W	LRG1	0.049
YLR143W	YLR143W	YDR157W	YDR157W	0.049
YLR143W	YLR143W	YDR181C	SAS4	0.049
YLR143W	YLR143W	YER156C	YER156C	0.049
YLR143W	YLR143W	YGR182C	YGR182C	0.049
YLR143W	YLR143W	YGR210C	YGR210C	0.049
YLR143W	YLR143W	YHL017W	YHL017W	0.049
YLR143W	YLR143W	YHR112C	YHR112C	0.049
YLR143W	YLR143W	YIL123W	SIM1	0.049
YLR143W	YLR143W	YIR027C	DAL1	0.049
YLR143W	YLR143W	YJR096W	YJR096W	0.049
YLR143W	YLR143W	YKR027W	BCH2	0.049
YLR143W	YLR143W	YKR040C	YKR040C	0.049
YLR143W	YLR143W	YMR160W	YMR160W	0.049
YLR143W	YLR143W	YMR204C	INP1	0.049
YLR143W	YLR143W	YOL035C	YOL035C	0.049
YLR143W	YLR143W	YOR052C	YOR052C	0.049
YLR143W	YLR143W	YOR366W	YOR366W	0.049
YLR143W	YLR143W	YAL031C	GIP4	0.048
YLR143W	YLR143W	YCL044C	MGR1	0.048
YLR143W	YLR143W	YDR163W	CWC15	0.048
YLR143W	YLR143W	YDR275W	BSC2	0.048
YLR143W	YLR143W	YGL179C	TOS3	0.048
YLR143W	YLR143W	YGR084C	MRP13	0.048
YLR143W	YLR143W	YGR100W	MDR1	0.048
YLR143W	YLR143W	YJL134W	LCB3	0.048
YLR143W	YLR143W	YLL025W	PAU17	0.048
YLR143W	YLR143W	YNR030W	ALG12	0.048
YLR143W	YLR143W	YOL081W	IRA2	0.048
YLR143W	YLR143W	YOR345C	YOR345C	0.048
YLR143W	YLR143W	YOR350C	MNE1	0.048
YLR143W	YLR143W	YPL199C	YPL199C	0.048
YLR143W	YLR143W	YPR066W	UBA3	0.048
YLR143W	YLR143W	YPR083W	MDM36	0.048
YLR143W	YLR143W	YAL046C	AIM1	0.047
YLR143W	YLR143W	YCR061W	YCR061W	0.047
YLR143W	YLR143W	YDR107C	TMN2	0.047
YLR143W	YLR143W	YDR131C	YDR131C	0.047
YLR143W	YLR143W	YDR389W	SAC7	0.047
YLR143W	YLR143W	YFR026C	ULI1	0.047
YLR143W	YLR143W	YGR027C	RPS25A	0.047
YLR143W	YLR143W	YGR041W	BUD9	0.047
YLR143W	YLR143W	YGR237C	YGR237C	0.047
YLR143W	YLR143W	YHR121W	LSM12	0.047
YLR143W	YLR143W	YHR203C	RPS4B	0.047
YLR143W	YLR143W	YJL171C	YJL171C	0.047
YLR143W	YLR143W	YKL038W	RGT1	0.047
YLR143W	YLR143W	YKL087C	CYT2	0.047
YLR143W	YLR143W	YLR109W	AHP1	0.047
YLR143W	YLR143W	YLR236C	YLR236C	0.047
YLR143W	YLR143W	YNL146W	YNL146W	0.047
YLR143W	YLR143W	YOR042W	CUE5	0.047
YLR143W	YLR143W	YOR123C	LEO1	0.047
YLR143W	YLR143W	YBL063W	KIP1	0.046
YLR143W	YLR143W	YBL095W	YBL095W	0.046
YLR143W	YLR143W	YCR062W	YCR062W	0.046
YLR143W	YLR143W	YDR108W	GSG1	0.046
YLR143W	YLR143W	YDR265W	PEX10	0.046
YLR143W	YLR143W	YER081W	SER3	0.046
YLR143W	YLR143W	YHR138C	YHR138C	0.046
YLR143W	YLR143W	YIL149C	MLP2	0.046
YLR143W	YLR143W	YJL154C	VPS35	0.046
YLR143W	YLR143W	YLR308W	CDA2	0.046
YLR143W	YLR143W	YNL057W	YNL057W	0.046
YLR143W	YLR143W	YNL122C	YNL122C	0.046
YLR143W	YLR143W	YOR013W	IRC11	0.046
YLR143W	YLR143W	YOR107W	RGS2	0.046
YLR143W	YLR143W	YPL136W	YPL136W	0.046
YLR143W	YLR143W	YPL149W	ATG5	0.046
YLR143W	YLR143W	YPL229W	YPL229W	0.046
YLR143W	YLR143W	YAR035W	YAT1	0.045
YLR143W	YLR143W	YBR018C	GAL7	0.045
YLR143W	YLR143W	YBR168W	PEX32	0.045
YLR143W	YLR143W	YBR238C	YBR238C	0.045
YLR143W	YLR143W	YCL036W	GFD2	0.045
YLR143W	YLR143W	YCR016W	YCR016W	0.045
YLR143W	YLR143W	YDL062W	YDL062W	0.045
YLR143W	YLR143W	YDL211C	YDL211C	0.045
YLR143W	YLR143W	YDR057W	YOS9	0.045
YLR143W	YLR143W	YDR225W	HTA1	0.045
YLR143W	YLR143W	YDR333C	YDR333C	0.045
YLR143W	YLR143W	YGR032W	GSC2	0.045
YLR143W	YLR143W	YGR129W	SYF2	0.045
YLR143W	YLR143W	YHR158C	KEL1	0.045
YLR143W	YLR143W	YJR135C	MCM22	0.045
YLR143W	YLR143W	YKR030W	GMH1	0.045
YLR143W	YLR143W	YLR110C	CCW12	0.045
YLR143W	YLR143W	YNL123W	NMA111	0.045
YLR143W	YLR143W	YOL087C	DUF1	0.045
YLR143W	YLR143W	YOL116W	MSN1	0.045
YLR143W	YLR143W	YOR229W	WTM2	0.045
YLR143W	YLR143W	YOR247W	SRL1	0.045
YLR143W	YLR143W	YOR320C	GNT1	0.045
YLR143W	YLR143W	YPL047W	SGF11	0.045
YLR143W	YLR143W	YPR115W	GCA1	0.045
YLR143W	YLR143W	YPR141C	KAR3	0.045
YLR143W	YLR143W	YAR002W	NUP60	0.044
YLR143W	YLR143W	YCR031C	RPS14A	0.044
YLR143W	YLR143W	YFL040W	YFL040W	0.044
YLR143W	YLR143W	YGR149W	YGR149W	0.044
YLR143W	YLR143W	YGR282C	BGL2	0.044
YLR143W	YLR143W	YHR012W	VPS29	0.044
YLR143W	YLR143W	YHR077C	NMD2	0.044
YLR143W	YLR143W	YJR044C	VPS55	0.044
YLR143W	YLR143W	YJR131W	MNS1	0.044
YLR143W	YLR143W	YLR374C	YLR374C	0.044
YLR143W	YLR143W	YLR446W	YLR446W	0.044
YLR143W	YLR143W	YML034W	SRC1	0.044
YLR143W	YLR143W	YMR007W	YMR007W	0.044
YLR143W	YLR143W	YOL086C	ADH1	0.044
YLR143W	YLR143W	YOR379C	YOR379C	0.044
YLR143W	YLR143W	YPR189W	SKI3	0.044
YLR143W	YLR143W	YAL058W	CNE1	0.043
YLR143W	YLR143W	YBR138C	YBR138C	0.043
YLR143W	YLR143W	YCL051W	LRE1	0.043
YLR143W	YLR143W	YDR030C	RAD28	0.043
YLR143W	YLR143W	YDR110W	FOB1	0.043
YLR143W	YLR143W	YDR153C	ENT5	0.043
YLR143W	YLR143W	YDR409W	SIZ1	0.043
YLR143W	YLR143W	YDR466W	PKH3	0.043
YLR143W	YLR143W	YER047C	SAP1	0.043
YLR143W	YLR143W	YFR047C	BNA6	0.043
YLR143W	YLR143W	YGR001C	AML1	0.043
YLR143W	YLR143W	YHR032W	YHR032W	0.043
YLR143W	YLR143W	YJL206C-A	YJL206C-A	0.043
YLR143W	YLR143W	YJR152W	DAL5	0.043
YLR143W	YLR143W	YLR095C	IOC2	0.043
YLR143W	YLR143W	YLR191W	PEX13	0.043
YLR143W	YLR143W	YMR194C-A	YMR194C-A	0.043
YLR143W	YLR143W	YNL100W	AIM37	0.043
YLR143W	YLR143W	YOR132W	VPS17	0.043
YLR143W	YLR143W	YOR279C	RFM1	0.043
YLR143W	YLR143W	YAL045C	YAL045C	0.042
YLR143W	YLR143W	YBL049W	MOH1	0.042
YLR143W	YLR143W	YCL050C	APA1	0.042
YLR143W	YLR143W	YCR107W	AAD3	0.042
YLR143W	YLR143W	YDR363W	ESC2	0.042
YLR143W	YLR143W	YER066C-A	YER066C-A	0.042
YLR143W	YLR143W	YGL036W	YGL036W	0.042
YLR143W	YLR143W	YGR227W	DIE2	0.042
YLR143W	YLR143W	YHL028W	WSC4	0.042
YLR143W	YLR143W	YHR045W	YHR045W	0.042
YLR143W	YLR143W	YHR086W	NAM8	0.042
YLR143W	YLR143W	YIR039C	YPS6	0.042
YLR143W	YLR143W	YJR051W	OSM1	0.042
YLR143W	YLR143W	YKL005C	BYE1	0.042
YLR143W	YLR143W	YKL116C	PRR1	0.042
YLR143W	YLR143W	YKL137W	CMC1	0.042
YLR143W	YLR143W	YKR065C	PAM17	0.042
YLR143W	YLR143W	YKR100C	SKG1	0.042
YLR143W	YLR143W	YLR006C	SSK1	0.042
YLR143W	YLR143W	YLR057W	YLR057W	0.042
YLR143W	YLR143W	YMR271C	URA10	0.042
YLR143W	YLR143W	YNL027W	CRZ1	0.042
YLR143W	YLR143W	YNL121C	TOM70	0.042
YLR143W	YLR143W	YNR049C	MSO1	0.042
YLR143W	YLR143W	YOR152C	YOR152C	0.042
YLR143W	YLR143W	YPL256C	CLN2	0.042
YLR143W	YLR143W	YBL029W	YBL029W	0.041
YLR143W	YLR143W	YBR239C	ERT1	0.041
YLR143W	YLR143W	YDR346C	SVF1	0.041
YLR143W	YLR143W	YDR522C	SPS2	0.041
YLR143W	YLR143W	YGL156W	AMS1	0.041
YLR143W	YLR143W	YGR105W	VMA21	0.041
YLR143W	YLR143W	YGR276C	RNH70	0.041
YLR143W	YLR143W	YGR284C	ERV29	0.041
YLR143W	YLR143W	YIL043C	CBR1	0.041
YLR143W	YLR143W	YKL167C	MRP49	0.041
YLR143W	YLR143W	YMR034C	YMR034C	0.041
YLR143W	YLR143W	YNL159C	ASI2	0.041
YLR143W	YLR143W	YOL009C	MDM12	0.041
YLR143W	YLR143W	YOL067C	RTG1	0.041
YLR143W	YLR143W	YOL088C	MPD2	0.041
YLR143W	YLR143W	YOR012W	YOR012W	0.041
YLR143W	YLR143W	YOR053W	YOR053W	0.041
YLR143W	YLR143W	YOR209C	NPT1	0.041
YLR143W	YLR143W	YOR304C-A	YOR304C-A	0.041
YLR143W	YLR143W	YBL051C	PIN4	0.04
YLR143W	YLR143W	YCR032W	BPH1	0.04
YLR143W	YLR143W	YDL180W	YDL180W	0.04
YLR143W	YLR143W	YDR005C	MAF1	0.04
YLR143W	YLR143W	YDR352W	YDR352W	0.04
YLR143W	YLR143W	YER130C	COM2	0.04
YLR143W	YLR143W	YGL032C	AGA2	0.04
YLR143W	YLR143W	YGL168W	HUR1	0.04
YLR143W	YLR143W	YGR177C	ATF2	0.04
YLR143W	YLR143W	YGR197C	SNG1	0.04
YLR143W	YLR143W	YGR213C	RTA1	0.04
YLR143W	YLR143W	YGR281W	YOR1	0.04
YLR143W	YLR143W	YHR167W	THP2	0.04
YLR143W	YLR143W	YLR177W	YLR177W	0.04
YLR143W	YLR143W	YLR185W	RPL37A	0.04
YLR143W	YLR143W	YLR193C	UPS1	0.04
YLR143W	YLR143W	YNL014W	HEF3	0.04
YLR143W	YLR143W	YNL070W	TOM7	0.04
YLR143W	YLR143W	YOL062C	APM4	0.04
YLR143W	YLR143W	YOR093C	CMR2	0.04
YLR143W	YLR143W	YPL167C	REV3	0.04
YLR143W	YLR143W	YPR013C	CMR3	0.04
YLR143W	YLR143W	YPR053C	YPR053C	0.04
YLR143W	YLR143W	YCL016C	DCC1	0.039
YLR143W	YLR143W	YDL144C	YDL144C	0.039
YLR143W	YLR143W	YDL201W	TRM8	0.039
YLR143W	YLR143W	YDL241W	YDL241W	0.039
YLR143W	YLR143W	YDR249C	YDR249C	0.039
YLR143W	YLR143W	YDR261C	EXG2	0.039
YLR143W	YLR143W	YFR049W	YMR31	0.039
YLR143W	YLR143W	YFR053C	HXK1	0.039
YLR143W	YLR143W	YGL180W	ATG1	0.039
YLR143W	YLR143W	YGL226W	MTC3	0.039
YLR143W	YLR143W	YGR233C	PHO81	0.039
YLR143W	YLR143W	YGR261C	APL6	0.039
YLR143W	YLR143W	YHR034C	PIH1	0.039
YLR143W	YLR143W	YHR079C	IRE1	0.039
YLR143W	YLR143W	YHR123W	EPT1	0.039
YLR143W	YLR143W	YJL077C	ICS3	0.039
YLR143W	YLR143W	YJL128C	PBS2	0.039
YLR143W	YLR143W	YJL135W	YJL135W	0.039
YLR143W	YLR143W	YLR217W	YLR217W	0.039
YLR143W	YLR143W	YLR330W	CHS5	0.039
YLR143W	YLR143W	YLR363C	NMD4	0.039
YLR143W	YLR143W	YML113W	DAT1	0.039
YLR143W	YLR143W	YMR273C	ZDS1	0.039
YLR143W	YLR143W	YMR320W	YMR320W	0.039
YLR143W	YLR143W	YNL090W	RHO2	0.039
YLR143W	YLR143W	YPL110C	GDE1	0.039
YLR143W	YLR143W	YPL269W	KAR9	0.039
YLR143W	YLR143W	YPR003C	YPR003C	0.039
YLR143W	YLR143W	YPR060C	ARO7	0.039
YLR143W	YLR143W	YPR134W	MSS18	0.039
YLR143W	YLR143W	YPR194C	OPT2	0.039
YLR143W	YLR143W	YAL056W	GPB2	0.038
YLR143W	YLR143W	YBR128C	ATG14	0.038
YLR143W	YLR143W	YBR207W	FTH1	0.038
YLR143W	YLR143W	YBR263W	SHM1	0.038
YLR143W	YLR143W	YDL124W	YDL124W	0.038
YLR143W	YLR143W	YDL203C	ACK1	0.038
YLR143W	YLR143W	YDR509W	YDR509W	0.038
YLR143W	YLR143W	YDR538W	PAD1	0.038
YLR143W	YLR143W	YER170W	ADK2	0.038
YLR143W	YLR143W	YFL001W	DEG1	0.038
YLR143W	YLR143W	YFL021W	GAT1	0.038
YLR143W	YLR143W	YFR033C	QCR6	0.038
YLR143W	YLR143W	YGL181W	GTS1	0.038
YLR143W	YLR143W	YGR108W	CLB1	0.038
YLR143W	YLR143W	YGR164W	YGR164W	0.038
YLR143W	YLR143W	YGR249W	MGA1	0.038
YLR143W	YLR143W	YHL034C	SBP1	0.038
YLR143W	YLR143W	YHL045W	YHL045W	0.038
YLR143W	YLR143W	YHR022C	YHR022C	0.038
YLR143W	YLR143W	YJR119C	JHD2	0.038
YLR143W	YLR143W	YMR016C	SOK2	0.038
YLR143W	YLR143W	YMR039C	SUB1	0.038
YLR143W	YLR143W	YMR265C	YMR265C	0.038
YLR143W	YLR143W	YOL043C	NTG2	0.038
YLR143W	YLR143W	YOL141W	PPM2	0.038
YLR143W	YLR143W	YOR240W	YOR240W	0.038
YLR143W	YLR143W	YPL206C	PGC1	0.038
YLR143W	YLR143W	YPR164W	MMS1	0.038
YLR143W	YLR143W	YAL010C	MDM10	0.037
YLR143W	YLR143W	YBR114W	RAD16	0.037
YLR143W	YLR143W	YBR270C	BIT2	0.037
YLR143W	YLR143W	YCR014C	POL4	0.037
YLR143W	YLR143W	YDR061W	YDR061W	0.037
YLR143W	YLR143W	YDR085C	AFR1	0.037
YLR143W	YLR143W	YDR223W	CRF1	0.037
YLR143W	YLR143W	YDR400W	URH1	0.037
YLR143W	YLR143W	YFL034W	YFL034W	0.037
YLR143W	YLR143W	YGR016W	YGR016W	0.037
YLR143W	YLR143W	YGR183C	QCR9	0.037
YLR143W	YLR143W	YHR008C	SOD2	0.037
YLR143W	YLR143W	YJR116W	YJR116W	0.037
YLR143W	YLR143W	YJR140C	HIR3	0.037
YLR143W	YLR143W	YMR172W	HOT1	0.037
YLR143W	YLR143W	YOL008W	COQ10	0.037
YLR143W	YLR143W	YOL109W	ZEO1	0.037
YLR143W	YLR143W	YOR230W	WTM1	0.037
YLR143W	YLR143W	YOR327C	SNC2	0.037
YLR143W	YLR143W	YOR356W	YOR356W	0.037
YLR143W	YLR143W	YPL115C	BEM3	0.037
YLR143W	YLR143W	YPR065W	ROX1	0.037
YLR143W	YLR143W	YAL022C	FUN26	0.036
YLR143W	YLR143W	YBL082C	ALG3	0.036
YLR143W	YLR143W	YBR151W	APD1	0.036
YLR143W	YLR143W	YER078C	ICP55	0.036
YLR143W	YLR143W	YER114C	BOI2	0.036
YLR143W	YLR143W	YGR270W	YTA7	0.036
YLR143W	YLR143W	YHR046C	INM1	0.036
YLR143W	YLR143W	YIL120W	QDR1	0.036
YLR143W	YLR143W	YJL110C	GZF3	0.036
YLR143W	YLR143W	YJL147C	YJL147C	0.036
YLR143W	YLR143W	YKL190W	CNB1	0.036
YLR143W	YLR143W	YLR286C	CTS1	0.036
YLR143W	YLR143W	YMR111C	YMR111C	0.036
YLR143W	YLR143W	YMR145C	NDE1	0.036
YLR143W	YLR143W	YMR300C	ADE4	0.036
YLR143W	YLR143W	YOR055W	YOR055W	0.036
YLR143W	YLR143W	YPL008W	CHL1	0.036
YLR143W	YLR143W	YPL262W	FUM1	0.036
YLR143W	YLR143W	YPR045C	YPR045C	0.036
YLR143W	YLR143W	YAR050W	FLO1	0.035
YLR143W	YLR143W	YBL024W	NCL1	0.035
YLR143W	YLR143W	YBL066C	SEF1	0.035
YLR143W	YLR143W	YBR082C	UBC4	0.035
YLR143W	YLR143W	YCR079W	PTC6	0.035
YLR143W	YLR143W	YDR250C	YDR250C	0.035
YLR143W	YLR143W	YER121W	YER121W	0.035
YLR143W	YLR143W	YER174C	GRX4	0.035
YLR143W	YLR143W	YGL028C	SCW11	0.035
YLR143W	YLR143W	YGL170C	SPO74	0.035
YLR143W	YLR143W	YKR017C	YKR017C	0.035
YLR143W	YLR143W	YKR066C	CCP1	0.035
YLR143W	YLR143W	YLR344W	RPL26A	0.035
YLR143W	YLR143W	YMR107W	SPG4	0.035
YLR143W	YLR143W	YOL052C	SPE2	0.035
YLR143W	YLR143W	YOR360C	PDE2	0.035
YLR143W	YLR143W	YPL247C	YPL247C	0.035
YLR143W	YLR143W	YPR140W	TAZ1	0.035
YLR143W	YLR143W	YAL024C	LTE1	0.034
YLR143W	YLR143W	YAR047C	YAR047C	0.034
YLR143W	YLR143W	YBL036C	YBL036C	0.034
YLR143W	YLR143W	YBR103W	SIF2	0.034
YLR143W	YLR143W	YBR105C	VID24	0.034
YLR143W	YLR143W	YCR082W	AHC2	0.034
YLR143W	YLR143W	YCR098C	GIT1	0.034
YLR143W	YLR143W	YDL242W	YDL242W	0.034
YLR143W	YLR143W	YDR159W	SAC3	0.034
YLR143W	YLR143W	YDR430C	CYM1	0.034
YLR143W	YLR143W	YER067W	RGI1	0.034
YLR143W	YLR143W	YIL054W	YIL054W	0.034
YLR143W	YLR143W	YJL137C	GLG2	0.034
YLR143W	YLR143W	YJR106W	ECM27	0.034
YLR143W	YLR143W	YJR110W	YMR1	0.034
YLR143W	YLR143W	YKL072W	STB6	0.034
YLR143W	YLR143W	YKL074C	MUD2	0.034
YLR143W	YLR143W	YLR126C	YLR126C	0.034
YLR143W	YLR143W	YLR251W	SYM1	0.034
YLR143W	YLR143W	YMR037C	MSN2	0.034
YLR143W	YLR143W	YMR143W	RPS16A	0.034
YLR143W	YLR143W	YMR169C	ALD3	0.034
YLR143W	YLR143W	YNL021W	HDA1	0.034
YLR143W	YLR143W	YOR268C	YOR268C	0.034
YLR143W	YLR143W	YPL060W	LPE10	0.034
YLR143W	YLR143W	YPL096W	PNG1	0.034
YLR143W	YLR143W	YPL138C	SPP1	0.034
YLR143W	YLR143W	YPL272C	YPL272C	0.034
YLR143W	YLR143W	YPR009W	SUT2	0.034
YLR143W	YLR143W	YBR090C-A	YBR090C-A	0.033
YLR143W	YLR143W	YER113C	TMN3	0.033
YLR143W	YLR143W	YER142C	MAG1	0.033
YLR143W	YLR143W	YFL042C	YFL042C	0.033
YLR143W	YLR143W	YGL066W	SGF73	0.033
YLR143W	YLR143W	YGL263W	COS12	0.033
YLR143W	YLR143W	YGR174C	CBP4	0.033
YLR143W	YLR143W	YIL041W	GVP36	0.033
YLR143W	YLR143W	YJR094C	IME1	0.033
YLR143W	YLR143W	YKL103C	LAP4	0.033
YLR143W	YLR143W	YKR074W	AIM29	0.033
YLR143W	YLR143W	YLL047W	YLL047W	0.033
YLR143W	YLR143W	YLR073C	YLR073C	0.033
YLR143W	YLR143W	YLR154C	RNH203	0.033
YLR143W	YLR143W	YLR241W	YLR241W	0.033
YLR143W	YLR143W	YLR320W	MMS22	0.033
YLR143W	YLR143W	YMR101C	SRT1	0.033
YLR143W	YLR143W	YMR207C	HFA1	0.033
YLR143W	YLR143W	YMR219W	ESC1	0.033
YLR143W	YLR143W	YNL066W	SUN4	0.033
YLR143W	YLR143W	YNL091W	NST1	0.033
YLR143W	YLR143W	YOR084W	LPX1	0.033
YLR143W	YLR143W	YOR100C	CRC1	0.033
YLR143W	YLR143W	YOR104W	PIN2	0.033
YLR143W	YLR143W	YPL150W	YPL150W	0.033
YLR143W	YLR143W	YAL040C	CLN3	0.032
YLR143W	YLR143W	YAL049C	AIM2	0.032
YLR143W	YLR143W	YBR062C	YBR062C	0.032
YLR143W	YLR143W	YCL035C	GRX1	0.032
YLR143W	YLR143W	YDL100C	GET3	0.032
YLR143W	YLR143W	YDL142C	CRD1	0.032
YLR143W	YLR143W	YDL155W	CLB3	0.032
YLR143W	YLR143W	YDR169C	STB3	0.032
YLR143W	YLR143W	YDR297W	SUR2	0.032
YLR143W	YLR143W	YDR375C	BCS1	0.032
YLR143W	YLR143W	YDR475C	JIP4	0.032
YLR143W	YLR143W	YFL010W-A	AUA1	0.032
YLR143W	YLR143W	YGL163C	RAD54	0.032
YLR143W	YLR143W	YGR142W	BTN2	0.032
YLR143W	YLR143W	YGR275W	RTT102	0.032
YLR143W	YLR143W	YHR037W	PUT2	0.032
YLR143W	YLR143W	YKL221W	MCH2	0.032
YLR143W	YLR143W	YKR021W	ALY1	0.032
YLR143W	YLR143W	YMR041C	ARA2	0.032
YLR143W	YLR143W	YMR180C	CTL1	0.032
YLR143W	YLR143W	YMR189W	GCV2	0.032
YLR143W	YLR143W	YOL073C	YOL073C	0.032
YLR143W	YLR143W	YOL129W	VPS68	0.032
YLR143W	YLR143W	YOR186W	YOR186W	0.032
YLR143W	YLR143W	YPL207W	TYW1	0.032
YLR143W	YLR143W	YBR205W	KTR3	0.031
YLR143W	YLR143W	YDR075W	PPH3	0.031
YLR143W	YLR143W	YDR202C	RAV2	0.031
YLR143W	YLR143W	YER089C	PTC2	0.031
YLR143W	YLR143W	YFR045W	YFR045W	0.031
YLR143W	YLR143W	YGL059W	PKP2	0.031
YLR143W	YLR143W	YGL216W	KIP3	0.031
YLR143W	YLR143W	YHR132C	ECM14	0.031
YLR143W	YLR143W	YIR024C	YIR024C	0.031
YLR143W	YLR143W	YJL218W	YJL218W	0.031
YLR143W	YLR143W	YKL110C	KTI12	0.031
YLR143W	YLR143W	YKL162C	YKL162C	0.031
YLR143W	YLR143W	YKR094C	RPL40B	0.031
YLR143W	YLR143W	YLR047C	FRE8	0.031
YLR143W	YLR143W	YLR333C	RPS25B	0.031
YLR143W	YLR143W	YML030W	AIM31	0.031
YLR143W	YLR143W	YML100W	TSL1	0.031
YLR143W	YLR143W	YMR086W	YMR086W	0.031
YLR143W	YLR143W	YOR180C	DCI1	0.031
YLR143W	YLR143W	YPL189W	GUP2	0.031
YLR143W	YLR143W	YPL260W	YPL260W	0.031
YLR143W	YLR143W	YBR028C	YBR028C	0.03
YLR143W	YLR143W	YBR194W	AIM4	0.03
YLR143W	YLR143W	YDL129W	YDL129W	0.03
YLR143W	YLR143W	YDL213C	NOP6	0.03
YLR143W	YLR143W	YDR165W	TRM82	0.03
YLR143W	YLR143W	YDR274C	YDR274C	0.03
YLR143W	YLR143W	YDR414C	ERD1	0.03
YLR143W	YLR143W	YDR517W	GRH1	0.03
YLR143W	YLR143W	YFL052W	YFL052W	0.03
YLR143W	YLR143W	YFR009W	GCN20	0.03
YLR143W	YLR143W	YGL062W	PYC1	0.03
YLR143W	YLR143W	YGR241C	YAP1802	0.03
YLR143W	YLR143W	YHR140W	YHR140W	0.03
YLR143W	YLR143W	YIR005W	IST3	0.03
YLR143W	YLR143W	YJL067W	YJL067W	0.03
YLR143W	YLR143W	YJL105W	SET4	0.03
YLR143W	YLR143W	YKR102W	FLO10	0.03
YLR143W	YLR143W	YLR039C	RIC1	0.03
YLR143W	YLR143W	YLR233C	EST1	0.03
YLR143W	YLR143W	YLR412W	BER1	0.03
YLR143W	YLR143W	YML120C	NDI1	0.03
YLR143W	YLR143W	YMR147W	YMR147W	0.03
YLR143W	YLR143W	YNL111C	CYB5	0.03
YLR143W	YLR143W	YOL018C	TLG2	0.03
YLR143W	YLR143W	YOL032W	OPI10	0.03
YLR143W	YLR143W	YOR079C	ATX2	0.03
YLR143W	YLR143W	YPL023C	MET12	0.03
YLR143W	YLR143W	YBR019C	GAL10	0.029
YLR143W	YLR143W	YCL056C	YCL056C	0.029
YLR143W	YLR143W	YDR004W	RAD57	0.029
YLR143W	YLR143W	YDR481C	PHO8	0.029
YLR143W	YLR143W	YER098W	UBP9	0.029
YLR143W	YLR143W	YFL012W	YFL012W	0.029
YLR143W	YLR143W	YGR066C	YGR066C	0.029
YLR143W	YLR143W	YGR079W	YGR079W	0.029
YLR143W	YLR143W	YGR205W	YGR205W	0.029
YLR143W	YLR143W	YIL159W	BNR1	0.029
YLR143W	YLR143W	YJL020C	BBC1	0.029
YLR143W	YLR143W	YKL040C	NFU1	0.029
YLR143W	YLR143W	YKL205W	LOS1	0.029
YLR143W	YLR143W	YMR129W	POM152	0.029
YLR143W	YLR143W	YMR226C	TMA29	0.029
YLR143W	YLR143W	YOL020W	TAT2	0.029
YLR143W	YLR143W	YOL063C	CRT10	0.029
YLR143W	YLR143W	YOL095C	HMI1	0.029
YLR143W	YLR143W	YOR008C-A	YOR008C-A	0.029
YLR143W	YLR143W	YOR011W	AUS1	0.029
YLR143W	YLR143W	YOR026W	BUB3	0.029
YLR143W	YLR143W	YOR068C	VAM10	0.029
YLR143W	YLR143W	YOR154W	SLP1	0.029
YLR143W	YLR143W	YOR322C	LDB19	0.029
YLR143W	YLR143W	YOR359W	VTS1	0.029
YLR143W	YLR143W	YPL066W	YPL066W	0.029
YLR143W	YLR143W	YCR106W	RDS1	0.028
YLR143W	YLR143W	YDL214C	PRR2	0.028
YLR143W	YLR143W	YDL230W	PTP1	0.028
YLR143W	YLR143W	YDR071C	PAA1	0.028
YLR143W	YLR143W	YDR096W	GIS1	0.028
YLR143W	YLR143W	YDR135C	YCF1	0.028
YLR143W	YLR143W	YDR438W	THI74	0.028
YLR143W	YLR143W	YDR485C	VPS72	0.028
YLR143W	YLR143W	YGL110C	CUE3	0.028
YLR143W	YLR143W	YGL230C	YGL230C	0.028
YLR143W	YLR143W	YGR133W	PEX4	0.028
YLR143W	YLR143W	YGR141W	VPS62	0.028
YLR143W	YLR143W	YHR178W	STB5	0.028
YLR143W	YLR143W	YIL079C	AIR1	0.028
YLR143W	YLR143W	YIL165C	YIL165C	0.028
YLR143W	YLR143W	YJL123C	MTC1	0.028
YLR143W	YLR143W	YJR080C	AIM24	0.028
YLR143W	YLR143W	YKL027W	YKL027W	0.028
YLR143W	YLR143W	YKR035C	OPI8	0.028
YLR143W	YLR143W	YLR040C	YLR040C	0.028
YLR143W	YLR143W	YLR252W	YLR252W	0.028
YLR143W	YLR143W	YLR353W	BUD8	0.028
YLR143W	YLR143W	YMR018W	YMR018W	0.028
YLR143W	YLR143W	YMR073C	IRC21	0.028
YLR143W	YLR143W	YMR193C-A	YMR193C-A	0.028
YLR143W	YLR143W	YMR306W	FKS3	0.028
YLR143W	YLR143W	YNL043C	YNL043C	0.028
YLR143W	YLR143W	YNL115C	YNL115C	0.028
YLR143W	YLR143W	YOL057W	YOL057W	0.028
YLR143W	YLR143W	YOR357C	SNX3	0.028
YLR143W	YLR143W	YPL216W	YPL216W	0.028
YLR143W	YLR143W	YPR046W	MCM16	0.028
YLR143W	YLR143W	YPR193C	HPA2	0.028
YLR143W	YLR143W	YAL059W	ECM1	0.027
YLR143W	YLR143W	YBL101C	ECM21	0.027
YLR143W	YLR143W	YBL103C	RTG3	0.027
YLR143W	YLR143W	YBR054W	YRO2	0.027
YLR143W	YLR143W	YBR176W	ECM31	0.027
YLR143W	YLR143W	YCR067C	SED4	0.027
YLR143W	YLR143W	YDL023C	YDL023C	0.027
YLR143W	YLR143W	YDL095W	PMT1	0.027
YLR143W	YLR143W	YDL187C	YDL187C	0.027
YLR143W	YLR143W	YDR059C	UBC5	0.027
YLR143W	YLR143W	YDR199W	YDR199W	0.027
YLR143W	YLR143W	YDR216W	ADR1	0.027
YLR143W	YLR143W	YDR221W	GTB1	0.027
YLR143W	YLR143W	YDR257C	RKM4	0.027
YLR143W	YLR143W	YDR259C	YAP6	0.027
YLR143W	YLR143W	YER054C	GIP2	0.027
YLR143W	YLR143W	YFL053W	DAK2	0.027
YLR143W	YLR143W	YGL235W	YGL235W	0.027
YLR143W	YLR143W	YGL252C	RTG2	0.027
YLR143W	YLR143W	YGR077C	PEX8	0.027
YLR143W	YLR143W	YHR156C	LIN1	0.027
YLR143W	YLR143W	YIL050W	PCL7	0.027
YLR143W	YLR143W	YIR035C	YIR035C	0.027
YLR143W	YLR143W	YJL130C	URA2	0.027
YLR143W	YLR143W	YJR031C	GEA1	0.027
YLR143W	YLR143W	YKL066W	YKL066W	0.027
YLR143W	YLR143W	YKL201C	MNN4	0.027
YLR143W	YLR143W	YLR079W	SIC1	0.027
YLR143W	YLR143W	YLR113W	HOG1	0.027
YLR143W	YLR143W	YML017W	PSP2	0.027
YLR143W	YLR143W	YNL071W	LAT1	0.027
YLR143W	YLR143W	YNR047W	FPK1	0.027
YLR143W	YLR143W	YOR021C	YOR021C	0.027
YLR143W	YLR143W	YPL261C	YPL261C	0.027
YLR143W	YLR143W	YPR096C	YPR096C	0.027
YLR143W	YLR143W	YBR058C	UBP14	0.026
YLR143W	YLR143W	YBR200W	BEM1	0.026
YLR143W	YLR143W	YCR065W	HCM1	0.026
YLR143W	YLR143W	YDL033C	SLM3	0.026
YLR143W	YLR143W	YDL065C	PEX19	0.026
YLR143W	YLR143W	YDL176W	YDL176W	0.026
YLR143W	YLR143W	YDR178W	SDH4	0.026
YLR143W	YLR143W	YDR220C	YDR220C	0.026
YLR143W	YLR143W	YGL086W	MAD1	0.026
YLR143W	YLR143W	YGL215W	CLG1	0.026
YLR143W	YLR143W	YGL243W	TAD1	0.026
YLR143W	YLR143W	YGR023W	MTL1	0.026
YLR143W	YLR143W	YHL047C	ARN2	0.026
YLR143W	YLR143W	YIL089W	YIL089W	0.026
YLR143W	YLR143W	YJL013C	MAD3	0.026
YLR143W	YLR143W	YJL112W	MDV1	0.026
YLR143W	YLR143W	YJL145W	SFH5	0.026
YLR143W	YLR143W	YJR015W	YJR015W	0.026
YLR143W	YLR143W	YJR082C	EAF6	0.026
YLR143W	YLR143W	YJR128W	YJR128W	0.026
YLR143W	YLR143W	YKL048C	ELM1	0.026
YLR143W	YLR143W	YLR119W	SRN2	0.026
YLR143W	YLR143W	YLR407W	YLR407W	0.026
YLR143W	YLR143W	YLR431C	ATG23	0.026
YLR143W	YLR143W	YMR221C	FMP42	0.026
YLR143W	YLR143W	YOL024W	YOL024W	0.026
YLR143W	YLR143W	YOR006C	TSR3	0.026
YLR143W	YLR143W	YOR031W	CRS5	0.026
YLR143W	YLR143W	YOR321W	PMT3	0.026
YLR143W	YLR143W	YPL037C	EGD1	0.026
YLR143W	YLR143W	YPL074W	YTA6	0.026
YLR143W	YLR143W	YPL248C	GAL4	0.026
YLR143W	YLR143W	YPR092W	YPR092W	0.026
YLR143W	YLR143W	YPR118W	MRI1	0.026
YLR143W	YLR143W	YBL071C	YBL071C	0.025
YLR143W	YLR143W	YBR250W	SPO23	0.025
YLR143W	YLR143W	YDR260C	SWM1	0.025
YLR143W	YLR143W	YDR474C	YDR474C	0.025
YLR143W	YLR143W	YER092W	IES5	0.025
YLR143W	YLR143W	YFR015C	GSY1	0.025
YLR143W	YLR143W	YFR021W	ATG18	0.025
YLR143W	YLR143W	YFR034C	PHO4	0.025
YLR143W	YLR143W	YGL037C	PNC1	0.025
YLR143W	YLR143W	YGL144C	ROG1	0.025
YLR143W	YLR143W	YGR081C	SLX9	0.025
YLR143W	YLR143W	YHR097C	YHR097C	0.025
YLR143W	YLR143W	YJL058C	BIT61	0.025
YLR143W	YLR143W	YJL214W	HXT8	0.025
YLR143W	YLR143W	YLL043W	FPS1	0.025
YLR143W	YLR143W	YLL062C	MHT1	0.025
YLR143W	YLR143W	YLR084C	RAX2	0.025
YLR143W	YLR143W	YLR231C	BNA5	0.025
YLR143W	YLR143W	YLR325C	RPL38	0.025
YLR143W	YLR143W	YML075C	HMG1	0.025
YLR143W	YLR143W	YML081C-A	ATP18	0.025
YLR143W	YLR143W	YML096W	YML096W	0.025
YLR143W	YLR143W	YMR175W	SIP18	0.025
YLR143W	YLR143W	YNL082W	PMS1	0.025
YLR143W	YLR143W	YPL177C	CUP9	0.025
YLR143W	YLR143W	YPR198W	SGE1	0.025
YLR143W	YLR143W	YBL096C	YBL096C	0.024
YLR143W	YLR143W	YBR150C	TBS1	0.024
YLR143W	YLR143W	YBR187W	GDT1	0.024
YLR143W	YLR143W	YDL130W-A	STF1	0.024
YLR143W	YLR143W	YDL199C	YDL199C	0.024
YLR143W	YLR143W	YDR001C	NTH1	0.024
YLR143W	YLR143W	YDR119W	VBA4	0.024
YLR143W	YLR143W	YDR399W	HPT1	0.024
YLR143W	YLR143W	YGR071C	YGR071C	0.024
YLR143W	YLR143W	YHR155W	YSP1	0.024
YLR143W	YLR143W	YIL012W	YIL012W	0.024
YLR143W	YLR143W	YIR025W	MND2	0.024
YLR143W	YLR143W	YJL093C	TOK1	0.024
YLR143W	YLR143W	YJL196C	ELO1	0.024
YLR143W	YLR143W	YKL031W	YKL031W	0.024
YLR143W	YLR143W	YKL121W	DGR2	0.024
YLR143W	YLR143W	YLR367W	RPS22B	0.024
YLR143W	YLR143W	YLR368W	MDM30	0.024
YLR143W	YLR143W	YLR377C	FBP1	0.024
YLR143W	YLR143W	YMR055C	BUB2	0.024
YLR143W	YLR143W	YMR060C	SAM37	0.024
YLR143W	YLR143W	YMR194W	RPL36A	0.024
YLR143W	YLR143W	YMR199W	CLN1	0.024
YLR143W	YLR143W	YMR294W-A	YMR294W-A	0.024
YLR143W	YLR143W	YMR319C	FET4	0.024
YLR143W	YLR143W	YNL044W	YIP3	0.024
YLR143W	YLR143W	YNL089C	YNL089C	0.024
YLR143W	YLR143W	YNL101W	AVT4	0.024
YLR143W	YLR143W	YOL065C	INP54	0.024
YLR143W	YLR143W	YOL118C	YOL118C	0.024
YLR143W	YLR143W	YOR005C	DNL4	0.024
YLR143W	YLR143W	YOR007C	SGT2	0.024
YLR143W	YLR143W	YOR014W	RTS1	0.024
YLR143W	YLR143W	YOR219C	STE13	0.024
YLR143W	YLR143W	YOR283W	YOR283W	0.024
YLR143W	YLR143W	YOR301W	RAX1	0.024
YLR143W	YLR143W	YPL164C	MLH3	0.024
YLR143W	YLR143W	YPR174C	YPR174C	0.024
YLR143W	YLR143W	YAL055W	PEX22	0.023
YLR143W	YLR143W	YAL065C	YAL065C	0.023
YLR143W	YLR143W	YBR276C	PPS1	0.023
YLR143W	YLR143W	YDL183C	YDL183C	0.023
YLR143W	YLR143W	YDR340W	YDR340W	0.023
YLR143W	YLR143W	YDR386W	MUS81	0.023
YLR143W	YLR143W	YFL044C	OTU1	0.023
YLR143W	YLR143W	YFR041C	ERJ5	0.023
YLR143W	YLR143W	YGL141W	HUL5	0.023
YLR143W	YLR143W	YGL257C	MNT2	0.023
YLR143W	YLR143W	YHL025W	SNF6	0.023
YLR143W	YLR143W	YIL134W	FLX1	0.023
YLR143W	YLR143W	YIR020W-B	YIR020W-B	0.023
YLR143W	YLR143W	YJL089W	SIP4	0.023
YLR143W	YLR143W	YJL103C	GSM1	0.023
YLR143W	YLR143W	YJL121C	RPE1	0.023
YLR143W	YLR143W	YJL141C	YAK1	0.023
YLR143W	YLR143W	YJL210W	PEX2	0.023
YLR143W	YLR143W	YJR107W	YJR107W	0.023
YLR143W	YLR143W	YJR154W	YJR154W	0.023
YLR143W	YLR143W	YKL094W	YJU3	0.023
YLR143W	YLR143W	YKL131W	YKL131W	0.023
YLR143W	YLR143W	YKL166C	TPK3	0.023
YLR143W	YLR143W	YKL168C	KKQ8	0.023
YLR143W	YLR143W	YKR076W	ECM4	0.023
YLR143W	YLR143W	YLL039C	UBI4	0.023
YLR143W	YLR143W	YLL060C	GTT2	0.023
YLR143W	YLR143W	YLR058C	SHM2	0.023
YLR143W	YLR143W	YLR307W	CDA1	0.023
YLR143W	YLR143W	YML103C	NUP188	0.023
YLR143W	YLR143W	YMR178W	YMR178W	0.023
YLR143W	YLR143W	YMR181C	YMR181C	0.023
YLR143W	YLR143W	YMR190C	SGS1	0.023
YLR143W	YLR143W	YNL056W	OCA2	0.023
YLR143W	YLR143W	YOL075C	YOL075C	0.023
YLR143W	YLR143W	YOL111C	MDY2	0.023
YLR143W	YLR143W	YOR072W	YOR072W	0.023
YLR143W	YLR143W	YOR134W	BAG7	0.023
YLR143W	YLR143W	YPL041C	YPL041C	0.023
YLR143W	YLR143W	YPR089W	YPR089W	0.023
YLR143W	YLR143W	YBR014C	GRX7	0.022
YLR143W	YLR143W	YBR137W	YBR137W	0.022
YLR143W	YLR143W	YCL033C	YCL033C	0.022
YLR143W	YLR143W	YCR034W	FEN1	0.022
YLR143W	YLR143W	YDL188C	PPH22	0.022
YLR143W	YLR143W	YDL215C	GDH2	0.022
YLR143W	YLR143W	YDR036C	EHD3	0.022
YLR143W	YLR143W	YDR383C	NKP1	0.022
YLR143W	YLR143W	YER061C	CEM1	0.022
YLR143W	YLR143W	YFL010C	WWM1	0.022
YLR143W	YLR143W	YGR087C	PDC6	0.022
YLR143W	YLR143W	YGR122C-A	YGR122C-A	0.022
YLR143W	YLR143W	YGR192C	TDH3	0.022
YLR143W	YLR143W	YHR104W	GRE3	0.022
YLR143W	YLR143W	YHR139C	SPS100	0.022
YLR143W	YLR143W	YIL009C-A	EST3	0.022
YLR143W	YLR143W	YIL025C	YIL025C	0.022
YLR143W	YLR143W	YIL029C	YIL029C	0.022
YLR143W	YLR143W	YIL113W	SDP1	0.022
YLR143W	YLR143W	YIL141W	YIL141W	0.022
YLR143W	YLR143W	YJL115W	ASF1	0.022
YLR143W	YLR143W	YJR003C	YJR003C	0.022
YLR143W	YLR143W	YKL033W-A	YKL033W-A	0.022
YLR143W	YLR143W	YKL098W	MTC2	0.022
YLR143W	YLR143W	YLR036C	YLR036C	0.022
YLR143W	YLR143W	YLR366W	YLR366W	0.022
YLR143W	YLR143W	YLR398C	SKI2	0.022
YLR143W	YLR143W	YML037C	YML037C	0.022
YLR143W	YLR143W	YMR086C-A	YMR086C-A	0.022
YLR143W	YLR143W	YMR100W	MUB1	0.022
YLR143W	YLR143W	YOR285W	YOR285W	0.022
YLR143W	YLR143W	YOR382W	FIT2	0.022
YLR143W	YLR143W	YPR120C	CLB5	0.022
YLR143W	YLR143W	YBR104W	YMC2	0.021
YLR143W	YLR143W	YCL002C	YCL002C	0.021
YLR143W	YLR143W	YCR087W	YCR087W	0.021
YLR143W	YLR143W	YCR102C	YCR102C	0.021
YLR143W	YLR143W	YDL002C	NHP10	0.021
YLR143W	YLR143W	YDL070W	BDF2	0.021
YLR143W	YLR143W	YDL083C	RPS16B	0.021
YLR143W	YLR143W	YDR077W	SED1	0.021
YLR143W	YLR143W	YER051W	JHD1	0.021
YLR143W	YLR143W	YGR069W	YGR069W	0.021
YLR143W	YLR143W	YGR072W	UPF3	0.021
YLR143W	YLR143W	YHR003C	YHR003C	0.021
YLR143W	YLR143W	YHR105W	YPT35	0.021
YLR143W	YLR143W	YJR115W	YJR115W	0.021
YLR143W	YLR143W	YKL086W	SRX1	0.021
YLR143W	YLR143W	YKL092C	BUD2	0.021
YLR143W	YLR143W	YKR059W	TIF1	0.021
YLR143W	YLR143W	YKR080W	MTD1	0.021
YLR143W	YLR143W	YLR178C	TFS1	0.021
YLR143W	YLR143W	YLR271W	YLR271W	0.021
YLR143W	YLR143W	YML068W	ITT1	0.021
YLR143W	YLR143W	YMR173W-A	YMR173W-A	0.021
YLR143W	YLR143W	YMR280C	CAT8	0.021
YLR143W	YLR143W	YNL009W	IDP3	0.021
YLR143W	YLR143W	YNL052W	COX5A	0.021
YLR143W	YLR143W	YOR085W	OST3	0.021
YLR143W	YLR143W	YOR105W	YOR105W	0.021
YLR143W	YLR143W	YOR196C	LIP5	0.021
YLR143W	YLR143W	YOR214C	YOR214C	0.021
YLR143W	YLR143W	YPL192C	PRM3	0.021
YLR143W	YLR143W	YPL257W	YPL257W	0.021
YLR143W	YLR143W	YPR026W	ATH1	0.021
YLR143W	YLR143W	YBR064W	YBR064W	0.02
YLR143W	YLR143W	YBR068C	BAP2	0.02
YLR143W	YLR143W	YDR174W	HMO1	0.02
YLR143W	YLR143W	YDR411C	DFM1	0.02
YLR143W	YLR143W	YFR040W	SAP155	0.02
YLR143W	YLR143W	YGR207C	YGR207C	0.02
YLR143W	YLR143W	YIL135C	VHS2	0.02
YLR143W	YLR143W	YJL068C	YJL068C	0.02
YLR143W	YLR143W	YJL108C	PRM10	0.02
YLR143W	YLR143W	YJL217W	REE1	0.02
YLR143W	YLR143W	YJR009C	TDH2	0.02
YLR143W	YLR143W	YJR014W	TMA22	0.02
YLR143W	YLR143W	YJR032W	CPR7	0.02
YLR143W	YLR143W	YJR077C	MIR1	0.02
YLR143W	YLR143W	YKL216W	URA1	0.02
YLR143W	YLR143W	YMR035W	IMP2	0.02
YLR143W	YLR143W	YNL157W	IGO1	0.02
YLR143W	YLR143W	YOR049C	RSB1	0.02
YLR143W	YLR143W	YOR138C	RUP1	0.02
YLR143W	YLR143W	YOR293W	RPS10A	0.02
YLR143W	YLR143W	YOR374W	ALD4	0.02
YLR143W	YLR143W	YPL027W	SMA1	0.02
YLR143W	YLR143W	YPL159C	PET20	0.02
YLR143W	YLR143W	YPL195W	APL5	0.02
YLR143W	YLR143W	YBR229C	ROT2	0.019
YLR143W	YLR143W	YBR233W	PBP2	0.019
YLR143W	YLR143W	YBR294W	SUL1	0.019
YLR143W	YLR143W	YCL069W	VBA3	0.019
YLR143W	YLR143W	YDL237W	LRC1	0.019
YLR143W	YLR143W	YDR035W	ARO3	0.019
YLR143W	YLR143W	YDR262W	YDR262W	0.019
YLR143W	YLR143W	YDR528W	HLR1	0.019
YLR143W	YLR143W	YER109C	FLO8	0.019
YLR143W	YLR143W	YER176W	ECM32	0.019
YLR143W	YLR143W	YER186C	YER186C	0.019
YLR143W	YLR143W	YFR039C	YFR039C	0.019
YLR143W	YLR143W	YGL152C	YGL152C	0.019
YLR143W	YLR143W	YGR003W	CUL3	0.019
YLR143W	YLR143W	YKR032W	YKR032W	0.019
YLR143W	YLR143W	YLR061W	RPL22A	0.019
YLR143W	YLR143W	YLR239C	LIP2	0.019
YLR143W	YLR143W	YLR448W	RPL6B	0.019
YLR143W	YLR143W	YML011C	RAD33	0.019
YLR143W	YLR143W	YML058C-A	YML058C-A	0.019
YLR143W	YLR143W	YMR002W	MIC17	0.019
YLR143W	YLR143W	YMR144W	YMR144W	0.019
YLR143W	YLR143W	YMR158C-A	YMR158C-A	0.019
YLR143W	YLR143W	YMR225C	MRPL44	0.019
YLR143W	YLR143W	YOL011W	PLB3	0.019
YLR143W	YLR143W	YOL132W	GAS4	0.019
YLR143W	YLR143W	YOR248W	YOR248W	0.019
YLR143W	YLR143W	YOR286W	AIM42	0.019
YLR143W	YLR143W	YPL032C	SVL3	0.019
YLR143W	YLR143W	YPL100W	ATG21	0.019
YLR143W	YLR143W	YPL203W	TPK2	0.019
YLR143W	YLR143W	YPL230W	USV1	0.019
YLR143W	YLR143W	YPR185W	ATG13	0.019
YLR143W	YLR143W	YBR169C	SSE2	0.018
YLR143W	YLR143W	YBR292C	YBR292C	0.018
YLR143W	YLR143W	YCR027C	RHB1	0.018
YLR143W	YLR143W	YCR083W	TRX3	0.018
YLR143W	YLR143W	YDL200C	MGT1	0.018
YLR143W	YLR143W	YDL236W	PHO13	0.018
YLR143W	YLR143W	YDR095C	YDR095C	0.018
YLR143W	YLR143W	YDR148C	KGD2	0.018
YLR143W	YLR143W	YDR251W	PAM1	0.018
YLR143W	YLR143W	YDR424C	DYN2	0.018
YLR143W	YLR143W	YER066W	YER066W	0.018
YLR143W	YLR143W	YER074W	RPS24A	0.018
YLR143W	YLR143W	YER132C	PMD1	0.018
YLR143W	YLR143W	YFR020W	YFR020W	0.018
YLR143W	YLR143W	YGL175C	SAE2	0.018
YLR143W	YLR143W	YGR070W	ROM1	0.018
YLR143W	YLR143W	YHL016C	DUR3	0.018
YLR143W	YLR143W	YJR053W	BFA1	0.018
YLR143W	YLR143W	YJR075W	HOC1	0.018
YLR143W	YLR143W	YML059C	NTE1	0.018
YLR143W	YLR143W	YML116W	ATR1	0.018
YLR143W	YLR143W	YMR282C	AEP2	0.018
YLR143W	YLR143W	YNL104C	LEU4	0.018
YLR143W	YLR143W	YOL019W	YOL019W	0.018
YLR143W	YLR143W	YPL098C	MGR2	0.018
YLR143W	YLR143W	YPL241C	CIN2	0.018
YLR143W	YLR143W	YBL021C	HAP3	0.017
YLR143W	YLR143W	YBL047C	EDE1	0.017
YLR143W	YLR143W	YBL078C	ATG8	0.017
YLR143W	YLR143W	YBR071W	YBR071W	0.017
YLR143W	YLR143W	YBR074W	YBR074W	0.017
YLR143W	YLR143W	YBR098W	MMS4	0.017
YLR143W	YLR143W	YBR100W	YBR100W	0.017
YLR143W	YLR143W	YBR165W	UBS1	0.017
YLR143W	YLR143W	YBR232C	YBR232C	0.017
YLR143W	YLR143W	YBR277C	YBR277C	0.017
YLR143W	YLR143W	YDL169C	UGX2	0.017
YLR143W	YLR143W	YDL192W	ARF1	0.017
YLR143W	YLR143W	YDR242W	AMD2	0.017
YLR143W	YLR143W	YDR281C	PHM6	0.017
YLR143W	YLR143W	YFL031W	HAC1	0.017
YLR143W	YLR143W	YGL042C	YGL042C	0.017
YLR143W	YLR143W	YGL051W	MST27	0.017
YLR143W	YLR143W	YGR143W	SKN1	0.017
YLR143W	YLR143W	YGR176W	YGR176W	0.017
YLR143W	YLR143W	YHR080C	YHR080C	0.017
YLR143W	YLR143W	YJL022W	YJL022W	0.017
YLR143W	YLR143W	YJR150C	DAN1	0.017
YLR143W	YLR143W	YLR016C	PML1	0.017
YLR143W	YLR143W	YLR043C	TRX1	0.017
YLR143W	YLR143W	YLR092W	SUL2	0.017
YLR143W	YLR143W	YML060W	OGG1	0.017
YLR143W	YLR143W	YML104C	MDM1	0.017
YLR143W	YLR143W	YMR004W	MVP1	0.017
YLR143W	YLR143W	YMR122C	YMR122C	0.017
YLR143W	YLR143W	YMR162C	DNF3	0.017
YLR143W	YLR143W	YMR253C	YMR253C	0.017
YLR143W	YLR143W	YOL042W	NGL1	0.017
YLR143W	YLR143W	YOR028C	CIN5	0.017
YLR143W	YLR143W	YOR252W	TMA16	0.017
YLR143W	YLR143W	YPL163C	SVS1	0.017
YLR143W	YLR143W	YPL214C	THI6	0.017
YLR143W	YLR143W	YPL225W	YPL225W	0.017
YLR143W	YLR143W	YPR152C	URN1	0.017
YLR143W	YLR143W	YBR031W	RPL4A	0.016
YLR143W	YLR143W	YBR090C	YBR090C	0.016
YLR143W	YLR143W	YBR214W	SDS24	0.016
YLR143W	YLR143W	YBR291C	CTP1	0.016
YLR143W	YLR143W	YCL001W-A	YCL001W-A	0.016
YLR143W	YLR143W	YDL010W	GRX6	0.016
YLR143W	YLR143W	YDR010C	YDR010C	0.016
YLR143W	YLR143W	YDR015C	YDR015C	0.016
YLR143W	YLR143W	YDR306C	YDR306C	0.016
YLR143W	YLR143W	YDR368W	YPR1	0.016
YLR143W	YLR143W	YDR501W	PLM2	0.016
YLR143W	YLR143W	YER095W	RAD51	0.016
YLR143W	YLR143W	YER124C	DSE1	0.016
YLR143W	YLR143W	YER144C	UBP5	0.016
YLR143W	YLR143W	YFR011C	AIM13	0.016
YLR143W	YLR143W	YGL151W	NUT1	0.016
YLR143W	YLR143W	YGR015C	YGR015C	0.016
YLR143W	YLR143W	YGR022C	YGR022C	0.016
YLR143W	YLR143W	YGR268C	HUA1	0.016
YLR143W	YLR143W	YHL046C	PAU13	0.016
YLR143W	YLR143W	YJL049W	YJL049W	0.016
YLR143W	YLR143W	YJL082W	IML2	0.016
YLR143W	YLR143W	YKL163W	PIR3	0.016
YLR143W	YLR143W	YLR038C	COX12	0.016
YLR143W	YLR143W	YLR254C	NDL1	0.016
YLR143W	YLR143W	YLR384C	IKI3	0.016
YLR143W	YLR143W	YNR029C	YNR029C	0.016
YLR143W	YLR143W	YOL114C	YOL114C	0.016
YLR143W	YLR143W	YOR113W	AZF1	0.016
YLR143W	YLR143W	YOR164C	GET4	0.016
YLR143W	YLR143W	YOR173W	DCS2	0.016
YLR143W	YLR143W	YOR271C	FSF1	0.016
YLR143W	YLR143W	YPL101W	ELP4	0.016
YLR143W	YLR143W	YPL176C	TRE1	0.016
YLR143W	YLR143W	YAL067C	SEO1	0.015
YLR143W	YLR143W	YBR230C	OM14	0.015
YLR143W	YLR143W	YBR269C	FMP21	0.015
YLR143W	YLR143W	YCL047C	YCL047C	0.015
YLR143W	YLR143W	YCR030C	SYP1	0.015
YLR143W	YLR143W	YCR037C	PHO87	0.015
YLR143W	YLR143W	YCR090C	YCR090C	0.015
YLR143W	YLR143W	YCR091W	KIN82	0.015
YLR143W	YLR143W	YDL113C	ATG20	0.015
YLR143W	YLR143W	YDR186C	YDR186C	0.015
YLR143W	YLR143W	YDR239C	YDR239C	0.015
YLR143W	YLR143W	YDR326C	YSP2	0.015
YLR143W	YLR143W	YDR378C	LSM6	0.015
YLR143W	YLR143W	YDR459C	PFA5	0.015
YLR143W	YLR143W	YDR463W	STP1	0.015
YLR143W	YLR143W	YDR532C	YDR532C	0.015
YLR143W	YLR143W	YER167W	BCK2	0.015
YLR143W	YLR143W	YFL032W	YFL032W	0.015
YLR143W	YLR143W	YFR055W	IRC7	0.015
YLR143W	YLR143W	YGR080W	TWF1	0.015
YLR143W	YLR143W	YGR283C	YGR283C	0.015
YLR143W	YLR143W	YHR143W	DSE2	0.015
YLR143W	YLR143W	YHR150W	PEX28	0.015
YLR143W	YLR143W	YHR154W	RTT107	0.015
YLR143W	YLR143W	YHR204W	MNL1	0.015
YLR143W	YLR143W	YIL030C	SSM4	0.015
YLR143W	YLR143W	YIL130W	ASG1	0.015
YLR143W	YLR143W	YJL057C	IKS1	0.015
YLR143W	YLR143W	YJL155C	FBP26	0.015
YLR143W	YLR143W	YJL168C	SET2	0.015
YLR143W	YLR143W	YML012C-A	YML012C-A	0.015
YLR143W	YLR143W	YMR110C	HFD1	0.015
YLR143W	YLR143W	YMR238W	DFG5	0.015
YLR143W	YLR143W	YOL028C	YAP7	0.015
YLR143W	YLR143W	YOL085C	YOL085C	0.015
YLR143W	YLR143W	YOL122C	SMF1	0.015
YLR143W	YLR143W	YOR041C	YOR041C	0.015
YLR143W	YLR143W	YOR242C	SSP2	0.015
YLR143W	YLR143W	YOR292C	YOR292C	0.015
YLR143W	YLR143W	YPL180W	TCO89	0.015
YLR143W	YLR143W	YAL053W	FLC2	0.014
YLR143W	YLR143W	YBR012C	YBR012C	0.014
YLR143W	YLR143W	YBR046C	ZTA1	0.014
YLR143W	YLR143W	YBR241C	YBR241C	0.014
YLR143W	YLR143W	YCL025C	AGP1	0.014
YLR143W	YLR143W	YDL171C	GLT1	0.014
YLR143W	YLR143W	YDL210W	UGA4	0.014
YLR143W	YLR143W	YDR093W	DNF2	0.014
YLR143W	YLR143W	YDR130C	FIN1	0.014
YLR143W	YLR143W	YDR426C	YDR426C	0.014
YLR143W	YLR143W	YDR440W	DOT1	0.014
YLR143W	YLR143W	YER059W	PCL6	0.014
YLR143W	YLR143W	YER060W	FCY21	0.014
YLR143W	YLR143W	YER073W	ALD5	0.014
YLR143W	YLR143W	YFR024C-A	LSB3	0.014
YLR143W	YLR143W	YGL083W	SCY1	0.014
YLR143W	YLR143W	YGL173C	KEM1	0.014
YLR143W	YLR143W	YGR226C	YGR226C	0.014
YLR143W	YLR143W	YGR242W	YGR242W	0.014
YLR143W	YLR143W	YHL039W	YHL039W	0.014
YLR143W	YLR143W	YHR134W	WSS1	0.014
YLR143W	YLR143W	YHR151C	MTC6	0.014
YLR143W	YLR143W	YIL072W	HOP1	0.014
YLR143W	YLR143W	YJL201W	ECM25	0.014
YLR143W	YLR143W	YKL020C	SPT23	0.014
YLR143W	YLR143W	YLR436C	ECM30	0.014
YLR143W	YLR143W	YNR015W	SMM1	0.014
YLR143W	YLR143W	YOR047C	STD1	0.014
YLR143W	YLR143W	YPL089C	RLM1	0.014
YLR143W	YLR143W	YPL112C	PEX25	0.014
YLR143W	YLR143W	YPL179W	PPQ1	0.014
YLR143W	YLR143W	YPR095C	SYT1	0.014
YLR143W	YLR143W	YPR171W	BSP1	0.014
YLR143W	YLR143W	YBR009C	HHF1	0.013
YLR143W	YLR143W	YBR030W	RKM3	0.013
YLR143W	YLR143W	YBR072W	HSP26	0.013
YLR143W	YLR143W	YBR149W	ARA1	0.013
YLR143W	YLR143W	YBR212W	NGR1	0.013
YLR143W	YLR143W	YBR273C	UBX7	0.013
YLR143W	YLR143W	YCR023C	YCR023C	0.013
YLR143W	YLR143W	YDL006W	PTC1	0.013
YLR143W	YLR143W	YDL024C	DIA3	0.013
YLR143W	YLR143W	YDR205W	MSC2	0.013
YLR143W	YLR143W	YDR354W	TRP4	0.013
YLR143W	YLR143W	YDR425W	SNX41	0.013
YLR143W	YLR143W	YER056C	FCY2	0.013
YLR143W	YLR143W	YER080W	AIM9	0.013
YLR143W	YLR143W	YFR057W	YFR057W	0.013
YLR143W	YLR143W	YGL027C	CWH41	0.013
YLR143W	YLR143W	YGL079W	YGL079W	0.013
YLR143W	YLR143W	YGL149W	YGL149W	0.013
YLR143W	YLR143W	YGL228W	SHE10	0.013
YLR143W	YLR143W	YHR081W	LRP1	0.013
YLR143W	YLR143W	YJL083W	TAX4	0.013
YLR143W	YLR143W	YJL158C	CIS3	0.013
YLR143W	YLR143W	YKR099W	BAS1	0.013
YLR143W	YLR143W	YLL023C	YLL023C	0.013
YLR143W	YLR143W	YLR273C	PIG1	0.013
YLR143W	YLR143W	YLR365W	YLR365W	0.013
YLR143W	YLR143W	YLR394W	CST9	0.013
YLR143W	YLR143W	YML072C	TCB3	0.013
YLR143W	YLR143W	YMR027W	YMR027W	0.013
YLR143W	YLR143W	YMR223W	UBP8	0.013
YLR143W	YLR143W	YMR272C	SCS7	0.013
YLR143W	YLR143W	YMR304C-A	YMR304C-A	0.013
YLR143W	YLR143W	YMR316C-B	YMR316C-B	0.013
YLR143W	YLR143W	YNL105W	YNL105W	0.013
YLR143W	YLR143W	YOL013C	HRD1	0.013
YLR143W	YLR143W	YOR050C	YOR050C	0.013
YLR143W	YLR143W	YPL014W	YPL014W	0.013
YLR143W	YLR143W	YPL246C	RBD2	0.013
YLR143W	YLR143W	YBL039C	URA7	0.012
YLR143W	YLR143W	YBR010W	HHT1	0.012
YLR143W	YLR143W	YCL023C	YCL023C	0.012
YLR143W	YLR143W	YCL024W	KCC4	0.012
YLR143W	YLR143W	YDR203W	YDR203W	0.012
YLR143W	YLR143W	YFR056C	YFR056C	0.012
YLR143W	YLR143W	YGR135W	PRE9	0.012
YLR143W	YLR143W	YGR206W	MVB12	0.012
YLR143W	YLR143W	YHL033C	RPL8A	0.012
YLR143W	YLR143W	YHR044C	DOG1	0.012
YLR143W	YLR143W	YHR131C	YHR131C	0.012
YLR143W	YLR143W	YIL138C	TPM2	0.012
YLR143W	YLR143W	YJL164C	TPK1	0.012
YLR143W	YLR143W	YJL181W	YJL181W	0.012
YLR143W	YLR143W	YJL211C	YJL211C	0.012
YLR143W	YLR143W	YJR117W	STE24	0.012
YLR143W	YLR143W	YKR057W	RPS21A	0.012
YLR143W	YLR143W	YLR248W	RCK2	0.012
YLR143W	YLR143W	YLR329W	REC102	0.012
YLR143W	YLR143W	YLR395C	COX8	0.012
YLR143W	YLR143W	YMR026C	PEX12	0.012
YLR143W	YLR143W	YMR183C	SSO2	0.012
YLR143W	YLR143W	YNL034W	YNL034W	0.012
YLR143W	YLR143W	YNL128W	TEP1	0.012
YLR143W	YLR143W	YOL104C	NDJ1	0.012
YLR143W	YLR143W	YOR029W	YOR029W	0.012
YLR143W	YLR143W	YOR139C	YOR139C	0.012
YLR143W	YLR143W	YOR184W	SER1	0.012
YLR143W	YLR143W	YOR188W	MSB1	0.012
YLR143W	YLR143W	YPL001W	HAT1	0.012
YLR143W	YLR143W	YPL034W	YPL034W	0.012
YLR143W	YLR143W	YPL213W	LEA1	0.012
YLR143W	YLR143W	YPL265W	DIP5	0.012
YLR143W	YLR143W	YPR018W	RLF2	0.012
YLR143W	YLR143W	YPR128C	ANT1	0.012
YLR143W	YLR143W	YAL030W	SNC1	0.011
YLR143W	YLR143W	YBR201W	DER1	0.011
YLR143W	YLR143W	YBR281C	DUG2	0.011
YLR143W	YLR143W	YCL009C	ILV6	0.011
YLR143W	YLR143W	YDL191W	RPL35A	0.011
YLR143W	YLR143W	YDR024W	FYV1	0.011
YLR143W	YLR143W	YDR284C	DPP1	0.011
YLR143W	YLR143W	YDR453C	TSA2	0.011
YLR143W	YLR143W	YER072W	VTC1	0.011
YLR143W	YLR143W	YER178W	PDA1	0.011
YLR143W	YLR143W	YFL025C	BST1	0.011
YLR143W	YLR143W	YGL023C	PIB2	0.011
YLR143W	YLR143W	YGL089C	MF(ALPHA)2	0.011
YLR143W	YLR143W	YGL125W	MET13	0.011
YLR143W	YLR143W	YGL221C	NIF3	0.011
YLR143W	YLR143W	YGR193C	PDX1	0.011
YLR143W	YLR143W	YGR214W	RPS0A	0.011
YLR143W	YLR143W	YHR162W	YHR162W	0.011
YLR143W	YLR143W	YHR193C	EGD2	0.011
YLR143W	YLR143W	YIL015W	BAR1	0.011
YLR143W	YLR143W	YIL099W	SGA1	0.011
YLR143W	YLR143W	YJR066W	TOR1	0.011
YLR143W	YLR143W	YKL106W	AAT1	0.011
YLR143W	YLR143W	YKL197C	PEX1	0.011
YLR143W	YLR143W	YKR005C	YKR005C	0.011
YLR143W	YLR143W	YKR105C	VBA5	0.011
YLR143W	YLR143W	YLR017W	MEU1	0.011
YLR143W	YLR143W	YML102W	CAC2	0.011
YLR143W	YLR143W	YNL041C	COG6	0.011
YLR143W	YLR143W	YNR058W	BIO3	0.011
YLR143W	YLR143W	YOR191W	ULS1	0.011
YLR143W	YLR143W	YPL121C	MEI5	0.011
YLR143W	YLR143W	YPL191C	YPL191C	0.011
YLR143W	YLR143W	YPR068C	HOS1	0.011
YLR143W	YLR143W	YAL036C	RBG1	0.01
YLR143W	YLR143W	YBL032W	HEK2	0.01
YLR143W	YLR143W	YBL085W	BOI1	0.01
YLR143W	YLR143W	YBR278W	DPB3	0.01
YLR143W	YLR143W	YCL075W	YCL075W	0.01
YLR143W	YLR143W	YCR105W	ADH7	0.01
YLR143W	YLR143W	YDR083W	RRP8	0.01
YLR143W	YLR143W	YDR214W	AHA1	0.01
YLR143W	YLR143W	YDR266C	YDR266C	0.01
YLR143W	YLR143W	YDR293C	SSD1	0.01
YLR143W	YLR143W	YER164W	CHD1	0.01
YLR143W	YLR143W	YFL049W	SWP82	0.01
YLR143W	YLR143W	YGL226C-A	OST5	0.01
YLR143W	YLR143W	YKR014C	YPT52	0.01
YLR143W	YLR143W	YLR237W	THI7	0.01
YLR143W	YLR143W	YMR068W	AVO2	0.01
YLR143W	YLR143W	YMR177W	MMT1	0.01
YLR143W	YLR143W	YNL081C	SWS2	0.01
YLR143W	YLR143W	YOL029C	YOL029C	0.01
YLR143W	YLR143W	YOR121C	YOR121C	0.01
YLR143W	YLR143W	YOR125C	CAT5	0.01
YLR143W	YLR143W	YOR227W	HER1	0.01
YLR143W	YLR143W	YPR024W	YME1	0.01
YLR143W	YLR143W	YPR192W	AQY1	0.01
YLR143W	YLR143W	YAR042W	SWH1	0.009
YLR143W	YLR143W	YBL042C	FUI1	0.009
YLR143W	YLR143W	YBL083C	YBL083C	0.009
YLR143W	YLR143W	YBR008C	FLR1	0.009
YLR143W	YLR143W	YBR255W	MTC4	0.009
YLR143W	YLR143W	YBR275C	RIF1	0.009
YLR143W	YLR143W	YCL060C	YCL060C	0.009
YLR143W	YLR143W	YDL197C	ASF2	0.009
YLR143W	YLR143W	YDR271C	YDR271C	0.009
YLR143W	YLR143W	YDR291W	HRQ1	0.009
YLR143W	YLR143W	YDR503C	LPP1	0.009
YLR143W	YLR143W	YGL007W	BRP1	0.009
YLR143W	YLR143W	YGL094C	PAN2	0.009
YLR143W	YLR143W	YGL262W	YGL262W	0.009
YLR143W	YLR143W	YGR093W	DRN1	0.009
YLR143W	YLR143W	YGR203W	YGR203W	0.009
YLR143W	YLR143W	YHL022C	SPO11	0.009
YLR143W	YLR143W	YHR029C	YHI9	0.009
YLR143W	YLR143W	YIL007C	NAS2	0.009
YLR143W	YLR143W	YIL035C	CKA1	0.009
YLR143W	YLR143W	YJL177W	RPL17B	0.009
YLR143W	YLR143W	YKL051W	SFK1	0.009
YLR143W	YLR143W	YKR069W	MET1	0.009
YLR143W	YLR143W	YLL038C	ENT4	0.009
YLR143W	YLR143W	YLR184W	YLR184W	0.009
YLR143W	YLR143W	YLR372W	SUR4	0.009
YLR143W	YLR143W	YLR401C	DUS3	0.009
[truncated: 2,277 more rows]
